# Supplementary material
Source: PubMed Central journal article supplement (PMC7252948)

# Supporting Information

## Umpolung Difunctionalization of Carbonyls via Visible-light Photoredox Catalytic Radical-Carbanion Relay

Shun Wang, Bei-Yi Cheng, Matea Sršen, Burkhard König\*

Institute of Organic Chemistry, Faculty of Chemistry and Pharmacy, University of Regensburg, D-93040 Regensburg, Germany

[burkhard.koenig@ur.de](mailto:burkhard.koenig@ur.de)

### Contents

|                                                     |     |
|-----------------------------------------------------|-----|
| 1. General information                              | S2  |
| 2. Starting materials                               | S4  |
| 3. Experimental procedures                          | S4  |
| 4. Optimization details for the reaction conditions | S6  |
| 5. Mechanistic studies                              | S12 |
| 6. Characterization of products                     | S33 |
| 7. References                                       | S57 |
| 8. Copies of NMR spectra                            | S58 |

## 1. General information

All NMR spectra were recorded at room temperature using a Bruker Avance 300 (300 MHz for  $^1\text{H}$ , 75 MHz for  $^{13}\text{C}$ , 282 MHz for  $^{19}\text{F}$ ), or a Bruker Avance 400 (400 MHz for  $^1\text{H}$ , 101 MHz for  $^{13}\text{C}$ , 376 MHz for  $^{19}\text{F}$ ) NMR spectrometer.<sup>1</sup> All chemical shifts are reported in  $\delta$  - scale as parts per million [ppm] (multiplicity, coupling constant  $J$ , number of protons) relative to the solvent residual peaks as the internal standard.<sup>2</sup> Coupling constants  $J$  are given in Hertz [Hz]. Abbreviations used for signal multiplicity:  $^1\text{H}$  - NMR: br = broad, s = singlet, d = doublet, t = triplet, q = quartet, dd = doublet of doublets, dt = doublet of triplets, and m = multiplet. High resolution mass spectra (HRMS) were obtained from the central analytic mass spectrometry facilities of the Faculty of Chemistry and Pharmacy, Regensburg University, and are reported according to the IUPAC recommendations 2013. All mass spectra were recorded on a Finnigan MAT 95, Thermo Quest Finnigan TSQ 7000, Finnigan MATSSQ 710 A or an Agilent Q - TOF 6540 UHD instrument. GC measurements were performed on a GC 7890 from Agilent Technologies. Data acquisition and evaluation was done with Agilent ChemStation Rev.C.01.04. [35]. Analytical TLC was performed on silica gel coated alumina plates (MN TLC sheets ALUGRAM<sup>®</sup> Xtra SIL G/UV254). Visualization was done by UV light (254 or 366 nm). If necessary, potassium permanganate was used for chemical staining. Purification by column chromatography was performed with silica gel 60 M (40 - 63  $\mu\text{m}$ , 230 - 440 mesh, Merck) on a Biotage<sup>®</sup> Isolera TM Spektra One device. All photocatalytic reactions were performed with 455 nm LEDs (OSRAM Oslon SSL 80 royal - blue LEDs ( $\lambda = 455 \text{ nm} (\pm 15 \text{ nm})$ , 3.5 V, 700 mA). The sample was irradiated with a LED through the vial's plane bottom side and cooled from the side using custom-made aluminum cooling blocks connected to a thermostat (Figure S1). Gram-scale reactions were in a classic glass tube photochemical reactor setup irradiated from the outside (Figure S2). The glass tube with reaction mixture and LED cooling block were thermostated at 25 °C.  $\text{CO}_2$  was bubbled continuously through the reaction mixture in the large-scale carboxylation reactions. UV-Vis and fluorescence measurements were performed with a Varian Cary 100 UV/Vis spectrophotometer and FluoroMax - 4 spectrofluorometer, respectively. Electrochemical studies were carried out under argon atmosphere. The measurements were performed in anhydrous solvent containing 0.1 M tetra-n-butylammonium tetrafluoroborate using ferrocene/ferrocenium ( $\text{Fc}/\text{Fc}^+$ ) as an internal reference. A glassy carbon electrode (working electrode), platinum wire counter electrode, and Ag quasi-reference electrode were employed. Commercially available starting materials and solvents were used without further purification.

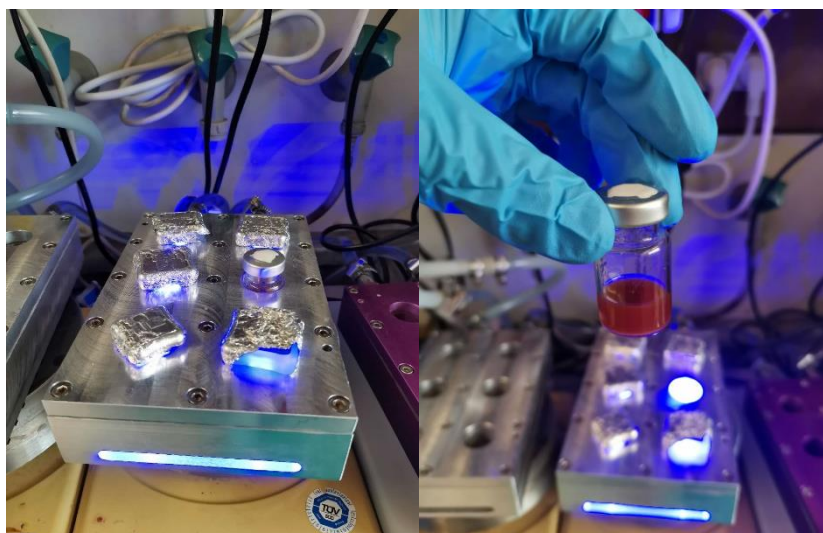

**Figure S1. Photochemical set-up for regular-scale reactions**

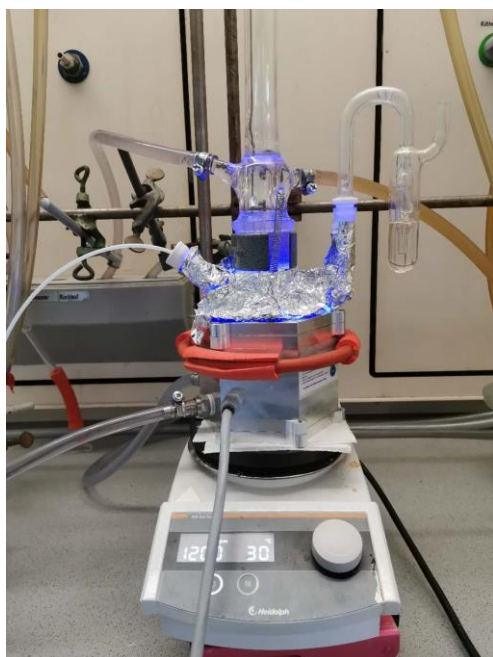

**Figure S2. Photochemical set-up for large-scale reactions**

## 2. Starting materials

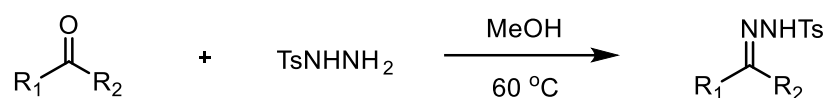

N-tosylhydrazone was prepared according a reported procedure.<sup>3</sup> To a stirred solution of tosylhydrazide (10 mmol) in MeOH (10 mL) at 60 °C, aldehyde or ketone (1 equiv.) was added dropwise (or portionwise if solid). The reaction was completed within 0.5 h. After that, the solvent was removed directly under reduced pressure, and the crude mixture was either directly used or further purified by recrystallization.

## 3. Experimental procedures

### General procedure A

To a 9 mL snap vial with magnetic stirring bar, tosylhydrazone (0.2 mmol), Cs<sub>2</sub>CO<sub>3</sub> (0.6 mmol), [Ir(dFCF<sub>3</sub>ppy)<sub>2</sub>dtbbpy]PF<sub>6</sub> (0.002 mmol) were added. The vial was evacuated and back filled with CO<sub>2</sub> for three times. A solution of thiol (0.3 mmol) in dry DMSO (2 mL) was added by syringe. Then the solution was bubbled with CO<sub>2</sub> for 3 minutes. After CO<sub>2</sub> (14 mL) was injected by syringe the vial was sealed with wax. The mixture was irradiated with a 455 nm LED at 25 °C. After 24 or 48 h, the mixture was quenched with 2N HCl and extracted with EtOAc (10 mL \*3). The combined organic phase was then washed with H<sub>2</sub>O (10 mL) and brine, dried over sodium sulfate, concentrated under vacuum. The residue was purified by silica gel flash chromatography (gradient eluent: petroleum ether/EtOAc/HOAc=50/1/0.1% to 10/1/0.1%) to give the desired product.

### General procedure B

To a 9 mL snap vial with magnetic stirring bar, tosylhydrazone (0.2 mmol), Cs<sub>2</sub>CO<sub>3</sub> (0.3 mmol), [Ir(dFCF<sub>3</sub>ppy)<sub>2</sub>dtbbpy]PF<sub>6</sub> (0.002 mmol) were added. The vial was evacuated and back filled with N<sub>2</sub> for three times. A solution of thiophenol (0.3 mmol) and carbonyl compound (0.8 mmol) in dry DMSO (2 mL) was added by syringe. The mixture was irradiated with a 455 nm LED at 25 °C. After 24 h, the mixture was quenched with H<sub>2</sub>O and extracted with EtOAc (10 mL \*3). The combined organic phase was then washed with H<sub>2</sub>O (10 mL) and brine, dried over sodium sulfate, concentrated under vacuum. The residue was purified by silica gel flash chromatography (gradient eluent: pentane/EtOAc =50/1 to 10/1) to give the desired product.

### General procedure C

To a 9 mL snap vial with magnetic stirring bar, tosylhydrazone (0.2 mmol), Cs<sub>2</sub>CO<sub>3</sub> (0.3 mmol), [Ir(dFCF<sub>3</sub>ppy)<sub>2</sub>dtbbpy]PF<sub>6</sub> (0.004 mmol) and CF<sub>3</sub>SO<sub>2</sub>Na (0.3 mmol) were added. The vial was evacuated and back filled with N<sub>2</sub> for three times, DMSO/acetone = 1/1 (1 mL) was added by syringe. The mixture was irradiated with a 455 nm LED at 25 °C. After the indicated time, the mixture was quenched with H<sub>2</sub>O and extracted with EtOAc (10 mL \*3). The combined organic phase was then washed with H<sub>2</sub>O (10 mL) and brine, dried over sodium sulfate, concentrated under vacuum. The residue was purified by silica gel flash chromatography (eluent: pentane/EA) to give the desired product.



#### **General procedure D-for “one-pot” thiocarboxylation of N-tosylhydrazone**

To a 9 mL snap vial with magnetic stirring bar, carbonyl compound (0.2 mmol), tosylhydrazide (0.2 mmol) and MeOH (1 mL), the mixture was stirred at 60 °C for 30 minutes. After the solvent was removed under vacuum, [Ir(dFCF<sub>3</sub>ppy)<sub>2</sub>dtbbpy]PF<sub>6</sub> (0.002 mmol) and Cs<sub>2</sub>CO<sub>3</sub> (0.6 mmol) were added. The vial was evacuated and back filled with CO<sub>2</sub> for three times. A solution of thiophenol (0.3 mmol) in dry DMSO (2 mL) was added by syringe. Then the solution was bubbled with CO<sub>2</sub> for 3 minutes. After CO<sub>2</sub> (14 mL) was injected by syringe the vial was sealed with wax. The mixture was irradiated with a 455 nm LED at 25 °C. After 24 or 48 h, the mixture was quenched with 2N HCl and extracted with EtOAc (10 mL \*3). The combined organic phase was then washed with H<sub>2</sub>O (10 mL) and brine, dried over sodium sulfate, concentrated under vacuum. The residue was purified by silica gel flash chromatography (gradient eluent: petroleum ether/EtOAc/HOAc=50/1/0.1% to 10/1/0.1%) to give the desired product.

#### **General procedure E-for “one-pot” 1,1-difluoroolefination of N-tosylhydrazone**

To a 9 mL snap vial with magnetic stirring bar, carbonyl compound (0.2 mmol), tosylhydrazide (0.2 mmol) and MeOH (1 mL), the mixture was stirred at 60 °C for 30 minutes. After the solvent was removed under vacuum, [Ir(dFCF<sub>3</sub>ppy)<sub>2</sub>dtbbpy]PF<sub>6</sub> (0.004 mmol), Cs<sub>2</sub>CO<sub>3</sub> (0.3 mmol) and CF<sub>3</sub>SO<sub>2</sub>Na (0.3 mmol) were added. The vial was evacuated and back filled with N<sub>2</sub> for three times, DMSO/acetone = 1/1 (1 mL) was added by syringe. The mixture was irradiated with a 455 nm LED at 25 °C. After the indicated time, the mixture was quenched with H<sub>2</sub>O and extracted with EtOAc (10 mL \*3). The combined organic phase was then washed with H<sub>2</sub>O (10 mL) and brine, dried over sodium sulfate, concentrated under vacuum. The residue was purified by silica gel flash chromatography (eluent: pentane/EA) to give the desired product.

## 4. Optimization details for the reaction conditions

### 4.1 Optimization details for thiocarboxylation of tosylhydrazone **1a**

**Table S1. Screening of photocatalysts<sup>a</sup>**

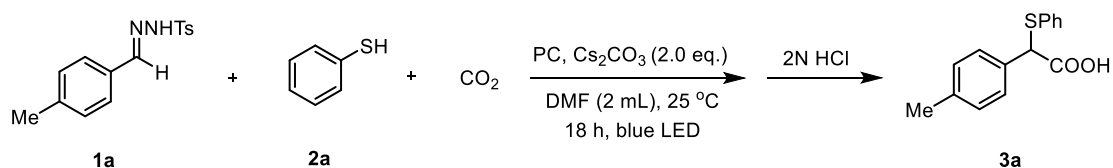

| Entry | PC (mol%)                                                               | CO <sub>2</sub> | Yield (%) <sup>b</sup> |
|-------|-------------------------------------------------------------------------|-----------------|------------------------|
| 1     | [Ir(dFCF <sub>3</sub> ppy) <sub>2</sub> dtbbpy]PF <sub>6</sub> (1 mol%) | 4 atm           | <b>55</b>              |
| 2     | [Ir(dFCF <sub>3</sub> ppy) <sub>2</sub> bpy]PF <sub>6</sub> (1 mol%)    | 4 atm           | 40                     |
| 3     | 4CzIPN (2 mol%)                                                         | 4 atm           | 0                      |
| 4     | Eosin Y (2 mol%)                                                        | 4 atm           | 0                      |
| 5     | [Ir(ppy) <sub>2</sub> dtbbpy]PF <sub>6</sub> (1 mol%)                   | 4 atm           | 13                     |
| 6     | Ru(bpy) <sub>3</sub> Cl <sub>2</sub> ·6H <sub>2</sub> O (1 mol%)        | 4 atm           | 34                     |
| 7     | -                                                                       | 4 atm           | 0                      |

<sup>a</sup> Reaction conditions: Unless otherwise noted, all reactions were carried out with **1a** (0.2 mmol), **2a** (0.4 mmol), Cs<sub>2</sub>CO<sub>3</sub> (0.4 mmol), photocatalyst and 4 atm of CO<sub>2</sub> in 2 mL DMF, irradiation with a blue LED at 25 °C for 24 hours. <sup>b</sup> Yields were determined by <sup>1</sup>H NMR analysis of crude reaction mixture using 1,3,5-trimethoxybenzene as internal standard.

**Table S2. Screening of solvents<sup>a</sup>**

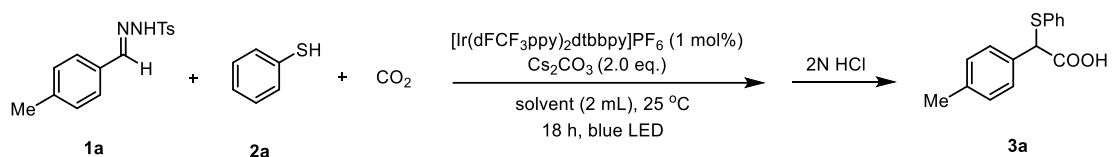

| Entry | Solvent | CO <sub>2</sub> | Yield (%) <sup>b</sup> |
|-------|---------|-----------------|------------------------|
| 1     | DMF     | 4 atm           | 55                     |
| 2     | DMSO    | 4 atm           | <b>68</b>              |
| 3     | MeCN    | 4 atm           | 0                      |
| 4     | toluene | 4 atm           | 0                      |
| 5     | THF     | 4 atm           | 0                      |

<sup>a</sup> Reaction conditions: Unless otherwise noted, all reactions were carried out with **1a** (0.2 mmol), **2a** (0.4 mmol), Cs<sub>2</sub>CO<sub>3</sub> (0.4 mmol), [Ir(dFCF<sub>3</sub>ppy)<sub>2</sub>dtbbpy]PF<sub>6</sub> (1 mol%) and 4 atm of CO<sub>2</sub> in 2 mL solvent, irradiation with blue LED at 25 °C for 24 hours. <sup>b</sup> Yields were determined by <sup>1</sup>H NMR analysis of crude reaction mixture using 1,3,5-trimethoxybenzene as internal standard.

**Table S3. Screening of bases<sup>a</sup>**

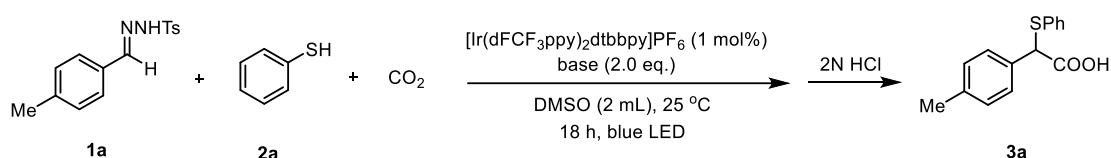

| Entry | Base                                      | CO <sub>2</sub> | Yield (%) <sup>b</sup> |
|-------|-------------------------------------------|-----------------|------------------------|
| 1     | Cs <sub>2</sub> CO <sub>3</sub>           | 4 atm.          | 68                     |
| 2     | K <sub>2</sub> CO <sub>3</sub>            | 4 atm.          | 39                     |
| 3     | Na <sub>2</sub> CO <sub>3</sub>           | 4 atm.          | 50                     |
| 4     | Li <sub>2</sub> CO <sub>3</sub>           | 4 atm.          | 10                     |
| 5     | NaHCO <sub>3</sub>                        | 4 atm.          | 16                     |
| 6     | K <sub>3</sub> PO <sub>4</sub>            | 4 atm.          | 53                     |
| 7     | CsOAc                                     | 4 atm.          | 55                     |
| 8     | KOAc                                      | 4 atm.          | 58                     |
| 9     | NaOAc                                     | 4 atm.          | 38                     |
| 10    | NaOH                                      | 4 atm.          | 47                     |
| 11    | DBU                                       | 4 atm.          | 44                     |
| 12    | Cs <sub>2</sub> CO <sub>3</sub> (1.0 eq.) | 4 atm.          | 57                     |
| 13    | Cs <sub>2</sub> CO <sub>3</sub> (1.5 eq.) | 4 atm.          | 66                     |
| 14    | Cs <sub>2</sub> CO <sub>3</sub> (2.5 eq.) | 4 atm.          | 71                     |
| 15    | Cs <sub>2</sub> CO <sub>3</sub> (3.0 eq.) | 4 atm.          | <b>76</b>              |
| 16    | -                                         | 4 atm.          | <b>0</b>               |

<sup>a</sup> Reaction conditions: Unless otherwise noted, all reactions were carried out with **1a** (0.2 mmol), **2a** (0.4 mmol), base, [Ir(dFCF<sub>3</sub>ppy)<sub>2</sub>dtbbpy]PF<sub>6</sub> (1 mol%) and 4 atm of CO<sub>2</sub> in 2 mL DMSO, irradiation with blue LED at 25 °C for 24 hours. <sup>b</sup> Yields were determined by <sup>1</sup>H NMR analysis of crude reaction mixture using 1,3,5-trimethoxybenzene as internal standard.

**Table S4. Screening of substrate ratios and control experiments<sup>a</sup>**

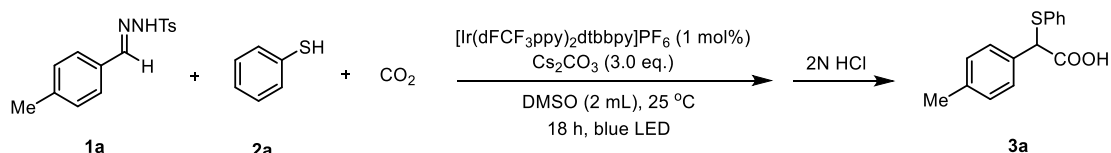

| Entry           | <b>1a</b> : <b>2a</b> | $\text{CO}_2$ | Yield (%) <sup>b</sup> |
|-----------------|-----------------------|---------------|------------------------|
| 1 <sup>c</sup>  | 1 : 2.0               | 4 atm.        | 21                     |
| 2               | 1 : 2.0               | 4 atm.        | 76                     |
| 3               | 1 : 1.5               | 4 atm.        | <b>81</b>              |
| 4               | 1 : 1.0               | 4 atm.        | 62                     |
| 5               | 1 : 2.5               | 4 atm.        | 72                     |
| 6               | 1 : 3.0               | 4 atm.        | 48                     |
| 7               | 1 : 1.5               | 2 atm.        | 65                     |
| 8               | 1 : 1.5               | balloon       | 70                     |
| 9               | 1 : 1.5               | 3 atm.        | <b>81</b>              |
| 10 <sup>d</sup> | 1 : 1.5               | 3 atm.        | 0                      |
| 11 <sup>e</sup> | 1 : 1.5               | 3 atm.        | 0                      |

<sup>a</sup> Reaction conditions: Unless otherwise noted, all reactions were carried out with **7a** (0.2 mmol), **8** (0.4 mmol), base (0.6 mmol),  $[\text{Ir}(\text{dFCF}_3\text{ppy})_2\text{dtbbpy}]\text{PF}_6$  (1 mol%) and 4 atm of  $\text{CO}_2$  in 2 mL DMSO, irradiation with a blue LED at 25 °C for 24 hours. <sup>b</sup> Yields were determined by  $^1\text{H}$  NMR analysis of crude reaction mixture using 1,3,5-trimethoxybenzene as internal standard. <sup>c</sup> **2a** was replaced by 2.0 eq. of PhSSPh (diphenyl disulfide). <sup>d</sup> without light. <sup>e</sup> without photocatalyst.

## 4.2 Optimization details for *gem*-difluoroolefination of tosylhydrazone **7a**

Table S5. Optimization of the reaction conditions<sup>a</sup>

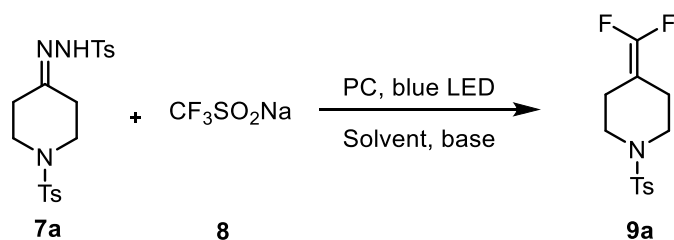

| Entry | Base (1.5 eq)                   | Photocatalyst                                                              | Solvent | Yield [%] <sup>b</sup> |
|-------|---------------------------------|----------------------------------------------------------------------------|---------|------------------------|
| 1     | Cs <sub>2</sub> CO <sub>3</sub> | [Ir(dFCF <sub>3</sub> ppy) <sub>2</sub> dtbbpy]PF <sub>6</sub><br>(1 mol%) | DMSO    | <b>59</b>              |
| 2     | K <sub>2</sub> CO <sub>3</sub>  | [Ir(dFCF <sub>3</sub> ppy) <sub>2</sub> dtbbpy]PF <sub>6</sub><br>(1 mol%) | DMSO    | 25                     |
| 3     | Na <sub>2</sub> CO <sub>3</sub> | [Ir(dFCF <sub>3</sub> ppy) <sub>2</sub> dtbbpy]PF <sub>6</sub><br>(1 mol%) | DMSO    | n.d                    |
| 4     | NaOH                            | [Ir(dFCF <sub>3</sub> ppy) <sub>2</sub> dtbbpy]PF <sub>6</sub><br>(1 mol%) | DMSO    | n.d                    |
| 5     | CH <sub>3</sub> COOCs           | [Ir(dFCF <sub>3</sub> ppy) <sub>2</sub> dtbbpy]PF <sub>6</sub><br>(1 mol%) | DMSO    | n.d                    |
| 6     | K <sub>3</sub> PO <sub>4</sub>  | [Ir(dFCF <sub>3</sub> ppy) <sub>2</sub> dtbbpy]PF <sub>6</sub><br>(1 mol%) | DMSO    | n.d                    |
| 7     | KO <sup>t</sup> Bu              | [Ir(dFCF <sub>3</sub> ppy) <sub>2</sub> dtbbpy]PF <sub>6</sub><br>(1 mol%) | DMSO    | n.d                    |
| 8     | 2,4,6-collidine                 | [Ir(dFCF <sub>3</sub> ppy) <sub>2</sub> dtbbpy]PF <sub>6</sub><br>(1 mol%) | DMSO    | n.d                    |
| 9     | CsF                             | [Ir(dFCF <sub>3</sub> ppy) <sub>2</sub> dtbbpy]PF <sub>6</sub><br>(1 mol%) | DMSO    | n.d                    |
| 10    | -                               | [Ir(dFCF <sub>3</sub> ppy) <sub>2</sub> dtbbpy]PF <sub>6</sub><br>(1 mol%) | DMSO    | n.d                    |

<sup>a</sup>Unless otherwise noted, all the reactions were carried out with **7a** (0.2 mmol), **8** (0.3 mmol), base (0.3 mmol), [Ir(dFCF<sub>3</sub>(ppy)<sub>2</sub>dtbbpy]PF<sub>6</sub> (1 mol%, 0.002 mmol) in DMSO (1 mL), irradiation with a blue LED at 25 °C for 24 h. <sup>b</sup> <sup>19</sup>F NMR yield using 4,4'-difluorobenzophenone as an internal standard. n.d = not detected

**Table S6. Photocatalyst screening**

| Entry | Base                            | Photocatalyst                                                                | Solvent | Yield[%] <sup>b</sup> |
|-------|---------------------------------|------------------------------------------------------------------------------|---------|-----------------------|
| 1     | Cs <sub>2</sub> CO <sub>3</sub> | [Ir(dFCF <sub>3</sub> ppy) <sub>2</sub> dtbbpy]PF <sub>6</sub><br>(1 mol%)   | DMSO    | 59                    |
| 2     | Cs <sub>2</sub> CO <sub>3</sub> | [Ir(dFCF <sub>3</sub> ppy) <sub>2</sub> dtbbpy]PF <sub>6</sub><br>(2 mol%)   | DMSO    | 61                    |
| 3     | Cs <sub>2</sub> CO <sub>3</sub> | [Ir(dFCF <sub>3</sub> ppy) <sub>2</sub> dtbbpy]PF <sub>6</sub><br>(0.5 mol%) | DMSO    | 44                    |
| 4     | Cs <sub>2</sub> CO <sub>3</sub> | [Ir(dFCF <sub>3</sub> ppy) <sub>2</sub> dtbbpy]PF <sub>6</sub><br>(1 mol%)   | DMSO    | 41                    |
| 5     | Cs <sub>2</sub> CO <sub>3</sub> | [IrdF(Me)(ppy) <sub>2</sub> dtbbpy]PF <sub>6</sub><br>(1 mol%)               | DMSO    | trace                 |
| 6     | Cs <sub>2</sub> CO <sub>3</sub> | [Ir(ppy) <sub>2</sub> dtbbpy]PF <sub>6</sub><br>(1 mol%)                     | DMSO    | n.d                   |
| 7     | Cs <sub>2</sub> CO <sub>3</sub> | 4CzIPN (5 mol%)                                                              | DMSO    | 18                    |
| 8     | Cs <sub>2</sub> CO <sub>3</sub> | EoSIn Y<br>(2 mol%)                                                          | DMSO    | n.d                   |
| 9     | Cs <sub>2</sub> CO <sub>3</sub> | Rh-6G<br>(10 mol%)                                                           | DMSO    | n.d                   |
| 10    | Cs <sub>2</sub> CO <sub>3</sub> | Fukuzumi ClO <sub>4</sub> <sup>-</sup><br>(5 mol%)                           | DMSO    | n.d                   |
| 11    | Cs <sub>2</sub> CO <sub>3</sub> | Carbon Nitride<br>20 mg                                                      | DMSO    | n.d                   |

<sup>a</sup> Unless otherwise noted, all the reactions were carried out with **7a** (0.2 mmol), **8** (0.3 mmol), base (0.3 mmol), photocatalyst (1 mol%, 0.002 mmol) in DMSO (1 mL), irradiation with a blue LED at 25 °C for 24 h. <sup>b</sup> <sup>19</sup>F NMR yield using 4,4'-difluorobenzophenone as an internal standard. n.d = not detected.

**Table S7. Optimization of the reaction conditions<sup>a</sup>**

| Entry | Base                            | Photocatalyst                                                              | Solvent | Yield [%] <sup>b</sup> |
|-------|---------------------------------|----------------------------------------------------------------------------|---------|------------------------|
| 1     | Cs <sub>2</sub> CO <sub>3</sub> | [Ir(dFCF <sub>3</sub> ppy) <sub>2</sub> dtbbpy]PF <sub>6</sub><br>(1 mol%) | DMF     | 38                     |
| 2     | Cs <sub>2</sub> CO <sub>3</sub> | [Ir(dFCF <sub>3</sub> ppy) <sub>2</sub> dtbbpy]PF <sub>6</sub><br>(1 mol%) | DMA     | 30                     |
| 3     | Cs <sub>2</sub> CO <sub>3</sub> | [Ir(dFCF <sub>3</sub> ppy) <sub>2</sub> dtbbpy]PF <sub>6</sub><br>(1 mol%) | MeCN    | trace                  |
| 4     | Cs <sub>2</sub> CO <sub>3</sub> | [Ir(dFCF <sub>3</sub> ppy) <sub>2</sub> dtbbpy]PF <sub>6</sub><br>(1 mol%) | DCE     | n.d                    |
| 5     | Cs <sub>2</sub> CO <sub>3</sub> | [Ir(dFCF <sub>3</sub> ppy) <sub>2</sub> dtbbpy]PF <sub>6</sub>             | THF     | n.d                    |

|                 |                                 |                                                                            |                                       |                            |
|-----------------|---------------------------------|----------------------------------------------------------------------------|---------------------------------------|----------------------------|
|                 |                                 | (1 mol%)                                                                   |                                       |                            |
| 6               | Cs <sub>2</sub> CO <sub>3</sub> | [Ir(dFCF <sub>3</sub> ppy) <sub>2</sub> dtbbpy]PF <sub>6</sub><br>(1 mol%) | toluene                               | n.d                        |
| 7               | Cs <sub>2</sub> CO <sub>3</sub> | [Ir(dFCF <sub>3</sub> ppy) <sub>2</sub> dtbbpy]PF <sub>6</sub><br>(1 mol%) | dioxane                               | n.d                        |
| 8               | Cs <sub>2</sub> CO <sub>3</sub> | [Ir(dFCF <sub>3</sub> ppy) <sub>2</sub> dtbbpy]PF <sub>6</sub><br>(1 mol%) | MeOH                                  | n.d                        |
| 9               | Cs <sub>2</sub> CO <sub>3</sub> | [Ir(dFCF <sub>3</sub> ppy) <sub>2</sub> dtbbpy]PF <sub>6</sub><br>(1 mol%) | NMP                                   | n.d                        |
| 10              | Cs <sub>2</sub> CO <sub>3</sub> | [Ir(dFCF <sub>3</sub> ppy) <sub>2</sub> dtbbpy]PF <sub>6</sub><br>(1 mol%) | DMSO/THF=4:1                          | 52                         |
| 11              | Cs <sub>2</sub> CO <sub>3</sub> | [IrdFCF <sub>3</sub> (ppy) <sub>2</sub> dtbbpy]PF <sub>6</sub><br>(1 mol%) | DMSO/1,4-dioxane=4:1                  | 53                         |
| 12              | Cs <sub>2</sub> CO <sub>3</sub> | [Ir(dFCF <sub>3</sub> ppy) <sub>2</sub> dtbbpy]PF <sub>6</sub><br>(1 mol%) | DMSO/MeCN=4:1                         | 62                         |
| 13              | Cs <sub>2</sub> CO <sub>3</sub> | [Ir(dFCF <sub>3</sub> ppy) <sub>2</sub> dtbbpy]PF <sub>6</sub><br>(1 mol%) | DMSO/EA=4:1                           | 62                         |
| 14              | Cs <sub>2</sub> CO <sub>3</sub> | [Ir(dFCF <sub>3</sub> ppy) <sub>2</sub> dtbbpy]PF <sub>6</sub><br>(1 mol%) | DMSO/toluene=4:1                      | 38                         |
| 15              | Cs <sub>2</sub> CO <sub>3</sub> | [Ir(dFCF <sub>3</sub> ppy) <sub>2</sub> dtbbpy]PF <sub>6</sub><br>(1 mol%) | DMSO/DME=4:1                          | 46                         |
| 16              | Cs <sub>2</sub> CO <sub>3</sub> | [Ir(dFCF <sub>3</sub> ppy) <sub>2</sub> dtbbpy]PF <sub>6</sub><br>(1 mol%) | DMSO/H <sub>2</sub> O=4:1             | n.d                        |
| 17              | Cs <sub>2</sub> CO <sub>3</sub> | [Ir(dFCF <sub>3</sub> ppy) <sub>2</sub> dtbbpy]PF <sub>6</sub><br>(1 mol%) | DMSO/acetone=4:1                      | 65                         |
| 18              | Cs <sub>2</sub> CO <sub>3</sub> | [Ir(dFCF <sub>3</sub> ppy) <sub>2</sub> dtbbpy]PF <sub>6</sub><br>(1 mol%) | DMSO/acetone=2:1                      | 67                         |
| 19              | Cs <sub>2</sub> CO <sub>3</sub> | [Ir(dFCF <sub>3</sub> ppy) <sub>2</sub> dtbbpy]PF <sub>6</sub><br>(1 mol%) | DMSO/acetone=1:1                      | 70                         |
| 20              | Cs <sub>2</sub> CO <sub>3</sub> | [Ir(dFCF <sub>3</sub> ppy) <sub>2</sub> dtbbpy]PF <sub>6</sub><br>(1 mol%) | DMSO/acetone=1:2                      | 70                         |
| 21              | Cs <sub>2</sub> CO <sub>3</sub> | [Ir(dFCF <sub>3</sub> ppy) <sub>2</sub> dtbbpy]PF <sub>6</sub><br>(1 mol%) | DMSO/acetone=1:1<br>(0.6 mL in total) | 65                         |
| 22              | Cs <sub>2</sub> CO <sub>3</sub> | [Ir(dFCF <sub>3</sub> ppy) <sub>2</sub> dtbbpy]PF <sub>6</sub><br>(1 mol%) | DMSO/acetone=1:1<br>(1.5 mL in total) | 70                         |
| 23              | Cs <sub>2</sub> CO <sub>3</sub> | [Ir(dFCF <sub>3</sub> ppy) <sub>2</sub> dtbbpy]PF <sub>6</sub><br>(2 mol%) | DMSO/acetone=1:1                      | <b>77 (73)<sup>c</sup></b> |
| 24              | Cs <sub>2</sub> CO <sub>3</sub> | -                                                                          | DMSO/acetone=1:1                      | n.d                        |
| 25 <sup>d</sup> | Cs <sub>2</sub> CO <sub>3</sub> | [Ir(dFCF <sub>3</sub> ppy) <sub>2</sub> dtbbpy]PF <sub>6</sub><br>(2 mol%) | DMSO/acetone=1:1                      | n.d                        |

<sup>a</sup> Unless otherwise noted, all the reactions were carried out with **7a** (0.2 mmol), **8** (0.3 mmol), Cs<sub>2</sub>CO<sub>3</sub> (0.3 mmol), [IrdFCF<sub>3</sub>(ppy)<sub>2</sub>dtbbpy]PF<sub>6</sub> (1 mol%, 0.002 mmol) in solvent (1 mL),

irradiation with a blue LED at 25 °C for 24 h. <sup>b</sup> <sup>19</sup>F NMR yield using 4,4'-difluorobenzophenone as an internal standard. n.d = not detected. <sup>c</sup> isolated yield. <sup>d</sup> in the dark.

## 5. Mechanistic studies

### CV measurements

CV measurements were taken on a three-electrode potentiostat galvanostat PGSTAT302N from Metrohm Autolab by using a glassy carbon working electrode, a platinum wire counter electrode, a silver wire as a reference electrode. The voltammograms were taken at room temperature in a degassed DMF or MeCN solution ([n-Bu<sub>4</sub>NBF<sub>4</sub>] = 0.1 M, [substrate] = 1 mM, ferrocene as the internal standard) under Argon atmosphere. The scan rate was 0.1 V/s. Potentials vs. SCE were reported according to  $E_{SCE} = E_{Fc/Fc^+} + 0.38$  V.

Index Peak position

- 1 0.67978
- 2 1.425
- 3 0.59418

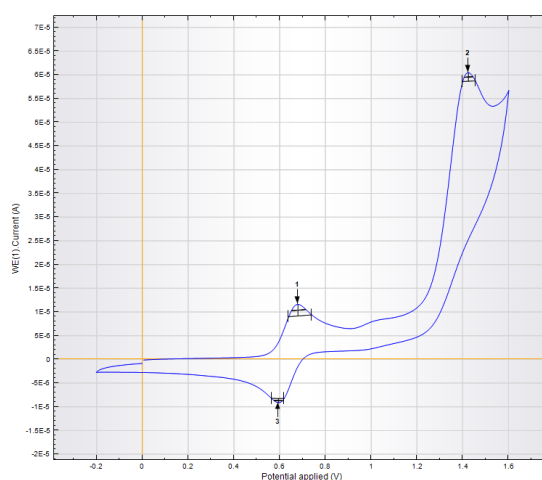

$E_{ox}(1a) = 1.17$  V vs. SCE

**Figure S3.** Cyclic voltammogram of N-tosylhydrazone **1a** in DMSO (with Ferrocene)

Index Peak position

- 1 2.0595
- 2 0.64957
- 3 0.569

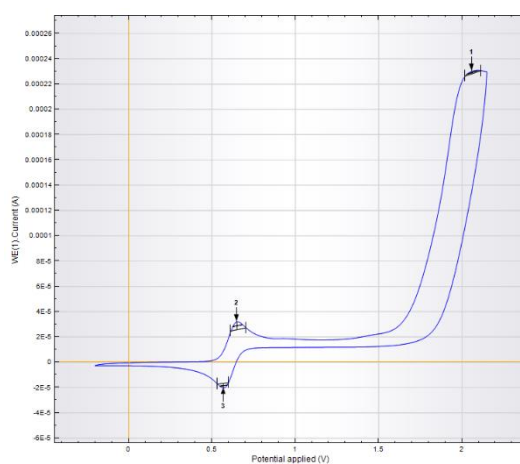

$E_{ox}(1a) = 1.83$  V vs. SCE

**Figure S4.** Cyclic voltammogram of N-tosylhydrazone **7a** in MeCN (with Ferrocene)



## “On-off” Experiments

Tosylhydrazone **1a** (0.2 mmol, 57.6 mg), Cs<sub>2</sub>CO<sub>3</sub> (0.6 mmol, 195.5 mg), [Ir(dFCF<sub>3</sub>ppy)<sub>2</sub>dtbbpy]PF<sub>6</sub> (0.002 mmol, 2.2 mg) were added into a 9 mL snap vial equipped with a stirring bar. The vial was evacuated and back filled with CO<sub>2</sub> for three times. A solution of thiophenol **2a** (0.3 mmol) in dry DMSO (2 mL) was added by syringe. Then the solution was bubbled with CO<sub>2</sub> for 3 minutes. After CO<sub>2</sub> (14 mL) was injected by syringe the vial was sealed with wax. The reaction mixture was irradiated by a blue LED at 25 °C. Parallel reactions were carried out for various reaction times. The yield of carboxylic acid was determined by <sup>1</sup>H NMR analysis using 1,3,5-trimethoxybenzene as internal standard after acidified with 2N HCl.

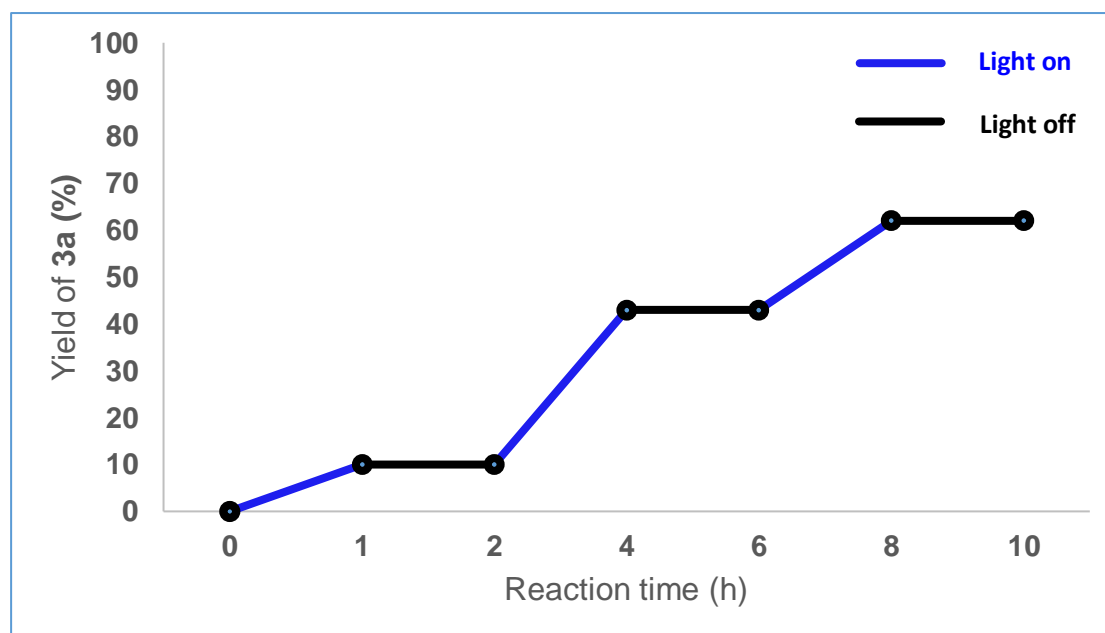

## Determination of the reaction quantum yield

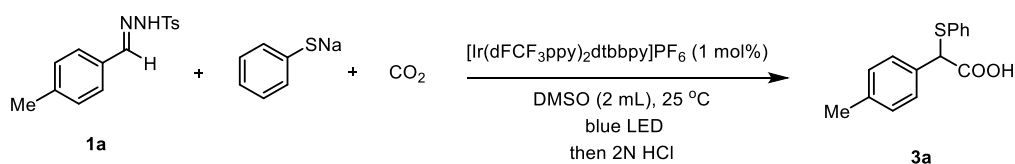

To a 9 mL snap vial, **1a** (0.2 mmol, 1.0 eq), sodium thiophenolate (0.3 mmol, 1.5 eq), [Ir(dFCF<sub>3</sub>ppy)<sub>2</sub>dtbbpy]PF<sub>6</sub> (0.002 mmol, 1 mol%) were added. The vial was evacuated and back filled with CO<sub>2</sub> for three times, and then dry DMSO (6 mL) was added by syringe. After that, 2 mL solution was transferred from the vial into the cuvette by syringe, the solution in cuvette was bubbled with CO<sub>2</sub> for 5 minutes and equipped with a CO<sub>2</sub> balloon. The sample was placed in the quantum yield spectrometer and irradiated with a 455 nm LED for 300.76 s. After irradiation, the yield of the formed product was determined by <sup>1</sup>H NMR analysis of acidified crude reaction mixture using 1,3,5-trimethoxybenzene as internal standard. The yield of **3a** was determined to be 28.5%.

$$\Phi = \frac{\text{Number of product molecules}}{\text{Number of absorbed photons}} = \frac{N_{\text{prod}}}{N_{\text{ph,abs}}} = \frac{c_{\text{prod}} \cdot V \cdot N_A \cdot h \cdot c}{P_{\text{abs}} \cdot \Delta t \cdot \lambda} = 2.1\%$$

$c_{\text{prod}}$ : concentration of product **3a**;  $V$ : 2 mL;  $N_A$ :  $6.02 \cdot 10^{23}/\text{mol}$ ;  $h$ : planck constant;  $c$ : speed of light;  
 $P_{\text{abs}}$ : absorbed optical power = 131.7 mW;  $\Delta t$ : illumination time = 300.76 s;  $\lambda$ : 455 nm.

The quantum yield ( $\Phi$ ) was calculated to be 2.1%

## Control experiments

### (A) Radical inhibiting and trapping experiments

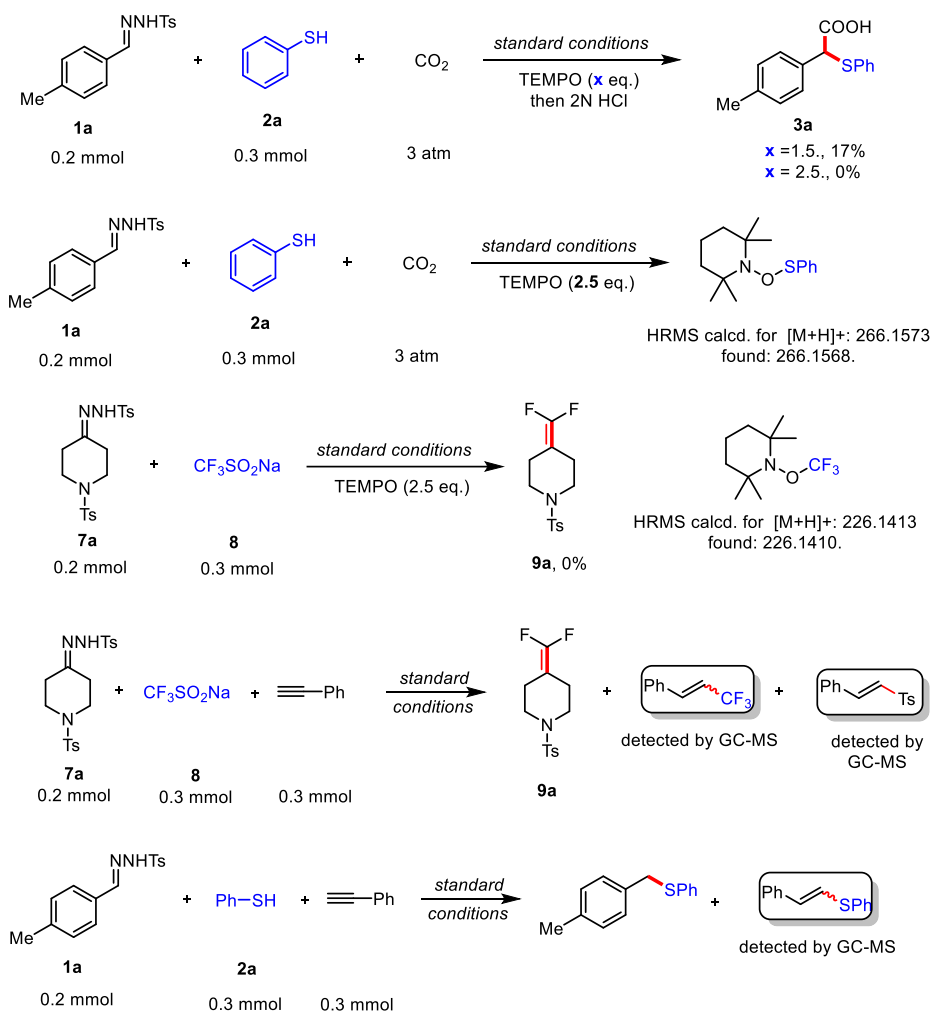

To further prove the existence of radicals (thiyl radicals, trifluoromethyl radical and tosyl radical) in the proposed catalytic cycle, we attempted to use trapping reagents including TEMPO and phenylacetylene under the standard conditions. First, products **3a** and **9a** were not formed when the radical scavenger TEMPO (2.5 eq.) was added to the thiocarboxylation and *gem*-difluoroolefination reaction respectively, TEMPO-SPh and TEMPO-CF<sub>3</sub> adducts were detected by HRMS. Moreover, hydrotrifluoromethylation and hydrothiolation products were detected by GC-MS when phenylacetylene was added. It is to be noted that the proposed tosyl radical could be trapped in the reaction of **7a** with **8** by the phenylacetylene to give hydrosulfonylation product.

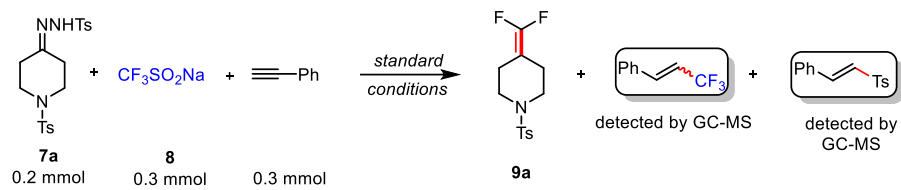

File :M:\Benutzer\Shun Wang\hydrazone revision\gc-ms\18.03.2020\G4  
 ... 016\_07.D  
 Operator :  
 Instrument : Intuvo MSD  
 Acquired : 18 Mar 2020 05:56 using AcqMethod G4016\_INT\_00.M  
 Sample Name: MS-R1-1  
 Misc Info : Wang

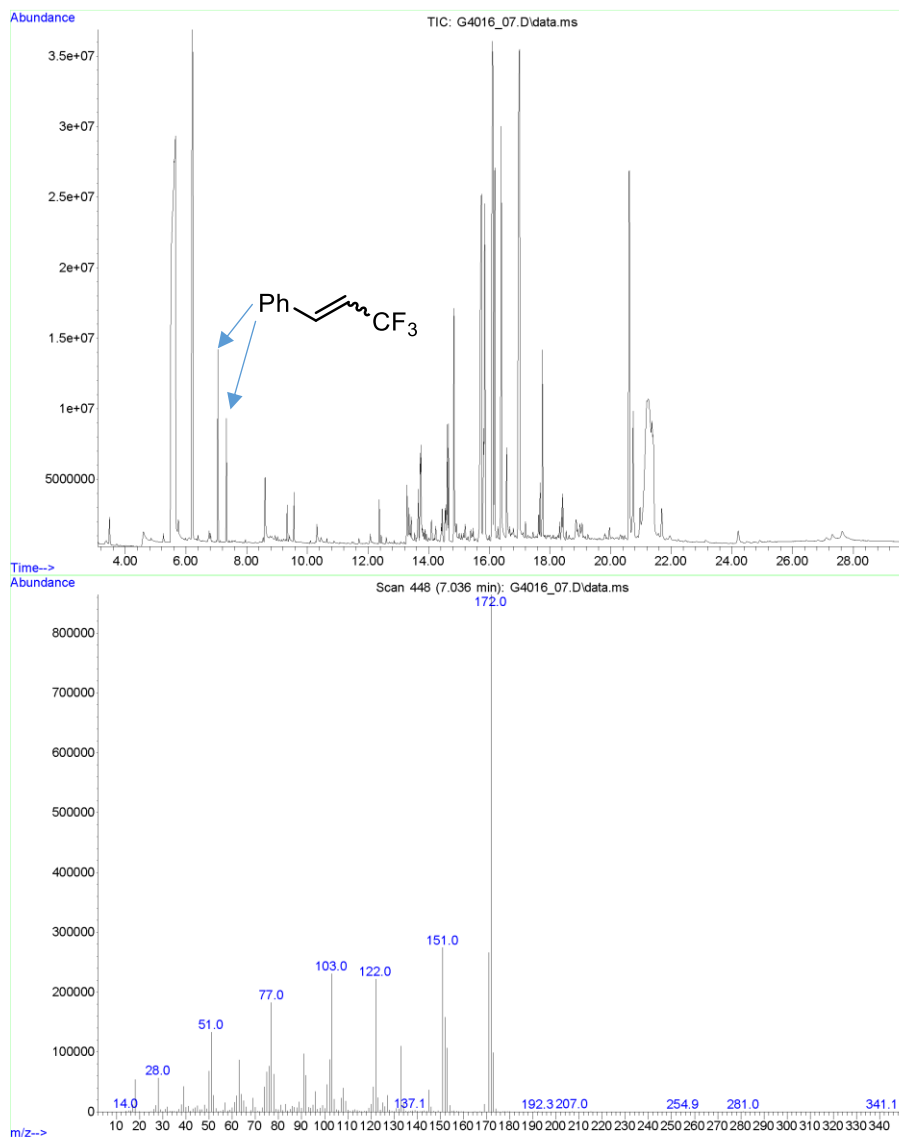

**Figure S5.** GC-MS report of hydrotrifluoromethylation product



File : M:\GCMS\_TEMP\Wang\G4016\_07.D  
 Operator :  
 Acquired : 18 Mar 2020 05:56 using AcqMethod G4016\_INT\_00.M  
 Instrument : Intuvo MSD  
 Sample Name : MS-R1-1  
 Misc Info : Wang  
 Vial Number : 33

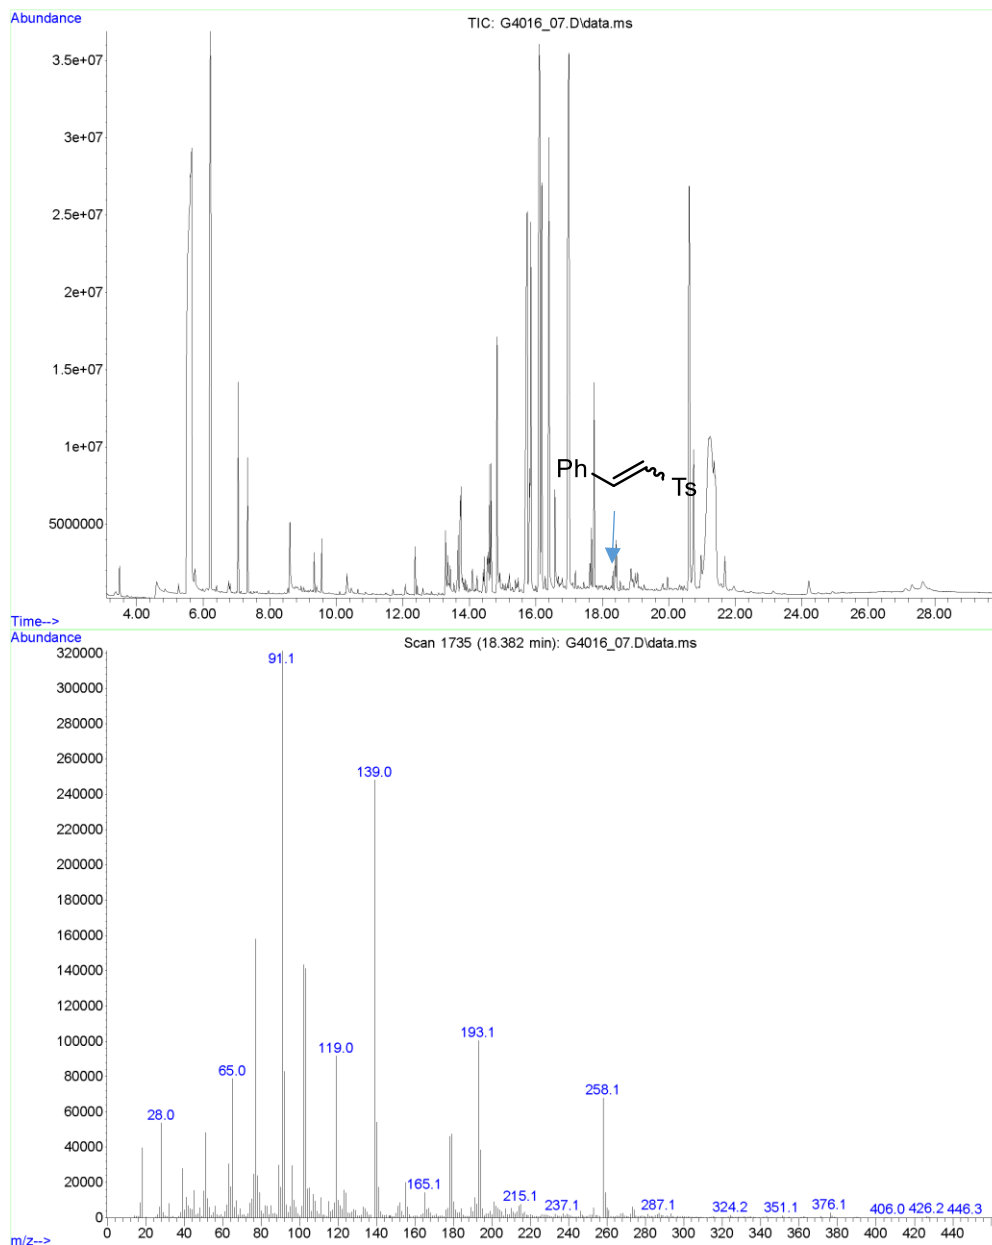

Figure S6. GC-MS report of hydrosulfonation product

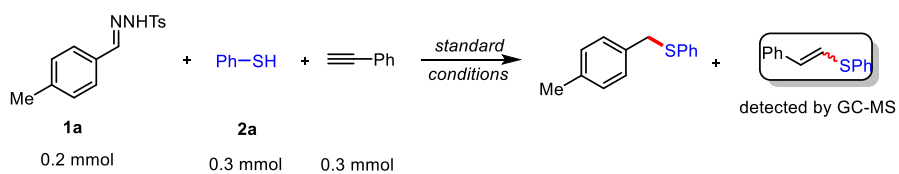

File : M:\GCMS\_TEMP\Wang\G3986\_00.D  
 Operator :  
 Acquired : 03 Mar 2020 22:09 using AcqMethod G3986\_INT\_00.M  
 Instrument : Intuvo MSD  
 Sample Name : SC-R 1  
 Misc Info : Wang  
 Vial Number: 13

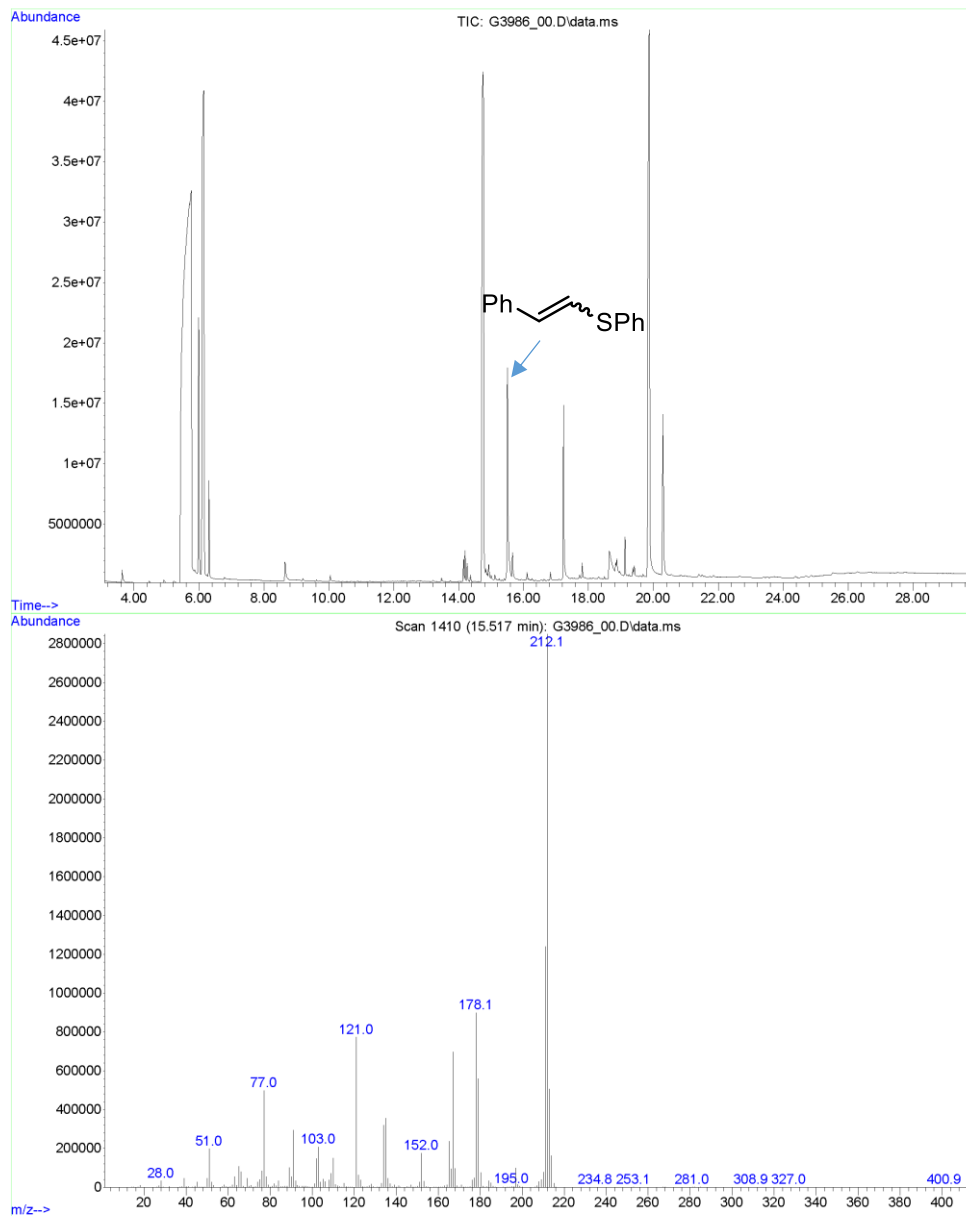

Figure S7. GC-MS report of hydrosulfonation product

### (B) Using sodium thiophenolate in place of thiophenol

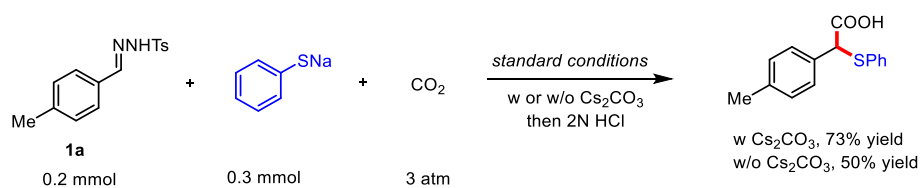

### (C) Control experiments in the absence of $\text{CO}_2$

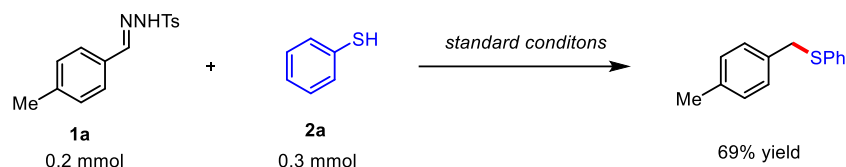

### (D) Deuterium incorporation experiments

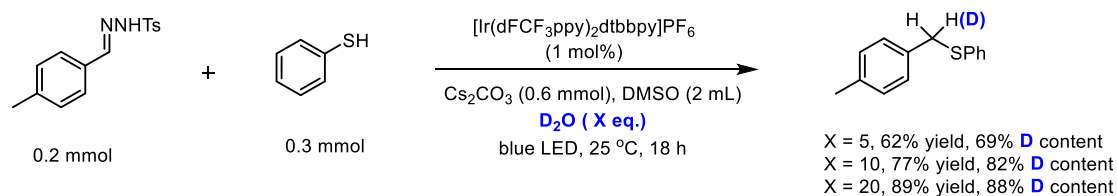

Tosylhydrazone **1a** (0.2 mmol, 57.6 mg),  $\text{Cs}_2\text{CO}_3$  (0.6 mmol, 195.5 mg),  $[\text{Ir}(\text{dFCF}_3\text{ppy})_2\text{dtbbpy}]\text{PF}_6$  (0.002 mmol, 2.2 mg) were added into a 9 mL snap vial equipped with a stirring bar. The vial was evacuated and back filled with  $\text{N}_2$  for three times. Then PhSH (0.3 mmol), dry DMSO (2.0 mL) and  $\text{D}_2\text{O}$  (x eq.) were added sequentially by syringes. The reaction mixtures were irradiated with a blue LED at 25 °C for 24 h. The reaction mixture was quenched with  $\text{H}_2\text{O}$  and extracted with EtOAc (10 mL \*3). The combined organic phase was then washed with  $\text{H}_2\text{O}$  (10 mL) and brine, dried over sodium sulfate, concentrated under vacuum. The residue was purified by silica gel flash chromatography (eluent: petroleum ether) to give the desired product. The recorded  $^1\text{H-NMR}$  spectra are depicted below.

**X = 5.0 eq.**

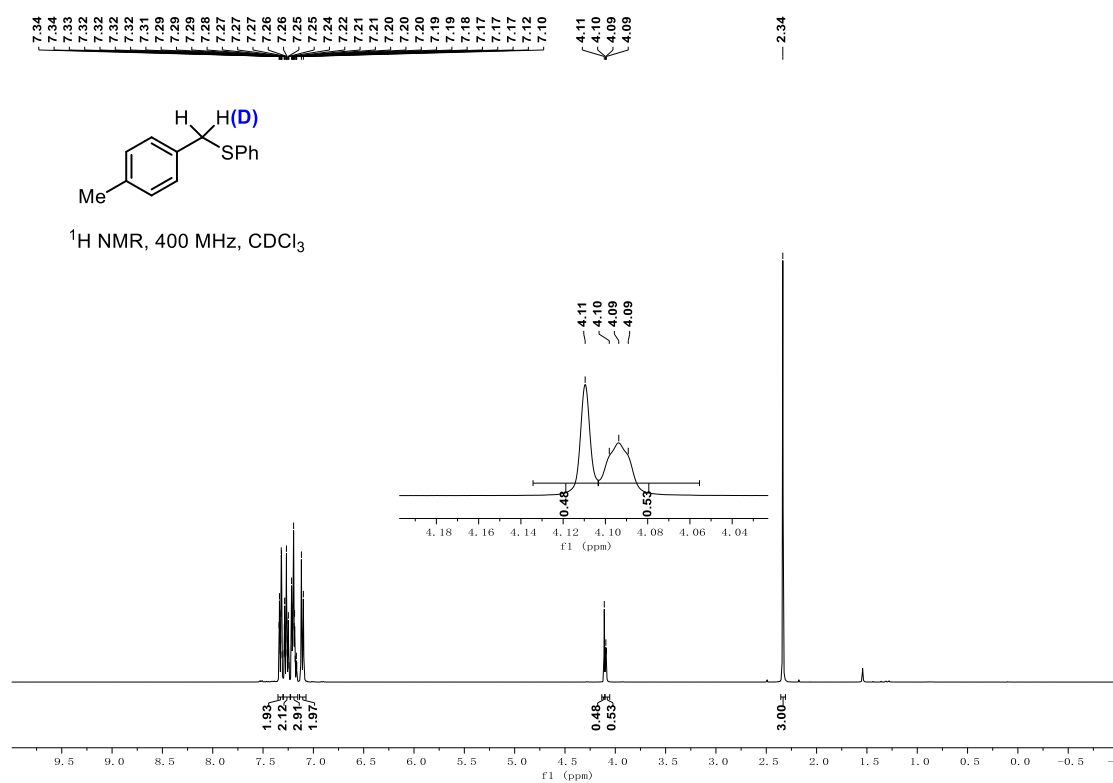

**X = 10.0 eq.**

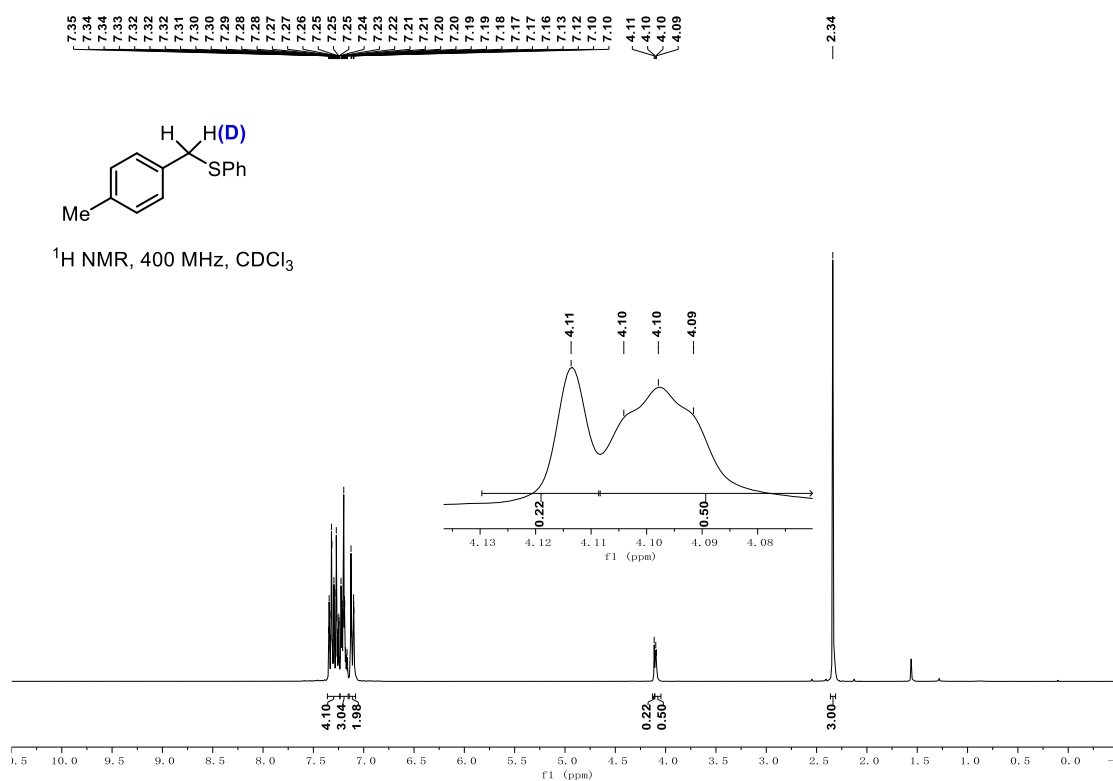

X = 20 eq.

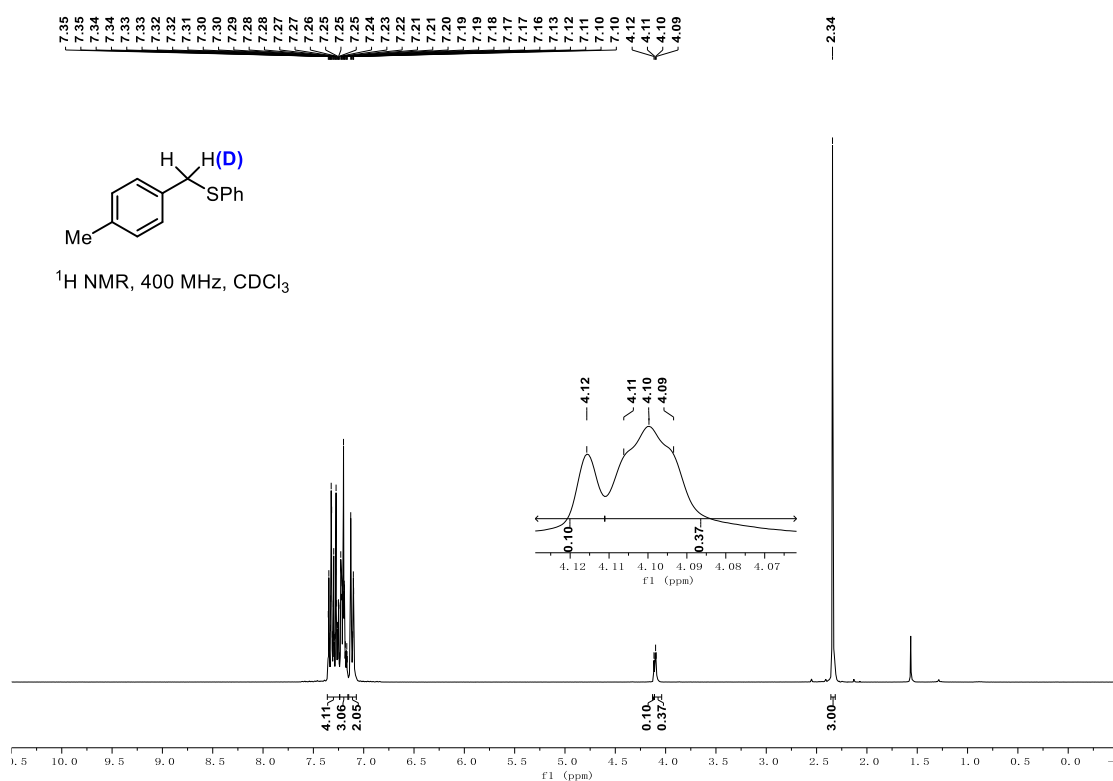

### (E) E1cb elimination

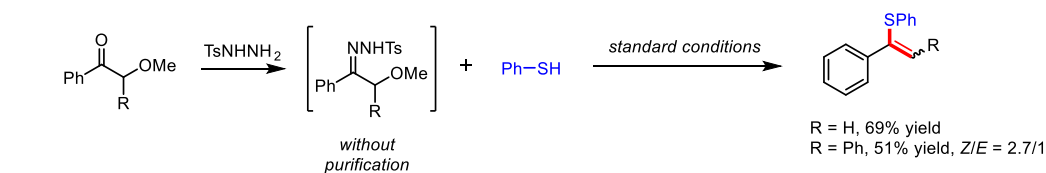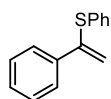

### phenyl(1-phenylvinyl)sulfane

The product was obtained as a colorless oil, 29.3 mg, yield = 69%. <sup>1</sup>H NMR (300 MHz, CDCl<sub>3</sub>) δ 7.56 – 7.50 (m, 2H), 7.32 – 7.28 (m, 2H), 7.22 – 7.11 (m, 4H), 7.16 – 7.11 (m, 2H), 5.57 (s, 1H), 5.21 (s, 1H). <sup>13</sup>C NMR (75 MHz, CDCl<sub>3</sub>) δ 144.43, 138.69, 133.75, 131.90, 129.01, 128.44, 128.26, 127.28, 127.12, 115.81. HRMS (EI) calcd for C<sub>14</sub>H<sub>12</sub>S [M]<sup>+</sup>: 212.0654, found: 212.0653.

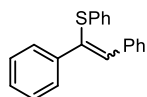

### (Z) and (E)-(1,2-diphenylvinyl)(phenyl)sulfane

The product was obtained as a colorless oil, 29.4 mg, yield = 51% (Z/E = 2.7/1). <sup>1</sup>H NMR (400 MHz, CDCl<sub>3</sub>) (Z and E isomer) δ 7.75 (dd, J = 7.5, 1.7 Hz, 3H), 7.67 – 7.61 (m, 3H), 7.43 – 7.33 (m, 7H), 7.32 – 7.18 (m, 16H), 7.14 – 7.07 (m, 6H), 7.06 – 7.00 (m, 1H), 6.98 – 6.94 (m, 2H), 6.80 (s, 1H). <sup>13</sup>C NMR (101 MHz, CDCl<sub>3</sub>) (Z and E isomer) δ 145.19, 144.59, 139.96, 138.15, 136.94, 134.73, 126.94, 125.75,



124.94, 124.72, 124.51, 123.82, 122.37, 121.91, 121.38, 120.96, 120.40, 119.63, 116.34, 111.60, 109.92, 109.45, 109.40. **HRMS** (EI) calcd for C<sub>20</sub>H<sub>16</sub>S [M]<sup>+</sup>: 288.0967, found: 288.0962.

### Luminescence quenching experiments

Luminescence spectra of  $[\text{Ir}(\text{dFCF}_3\text{ppy})_2\text{dtbbpy}]\text{PF}_6$  ( $1.0 \times 10^{-5}\text{M}$ ) was collected as a function of different quenchers in degassed DMSO with excitation at 420 nm and data of emission intensity at 480 nm was recorded.

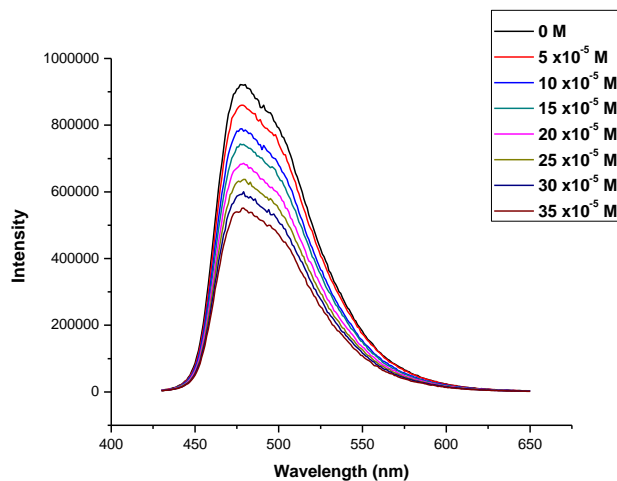

**Figure S8.** A solution of PhSNa in DMSO was added and its concentration was changed from 0 to  $35 \times 10^{-5}\text{ M}$

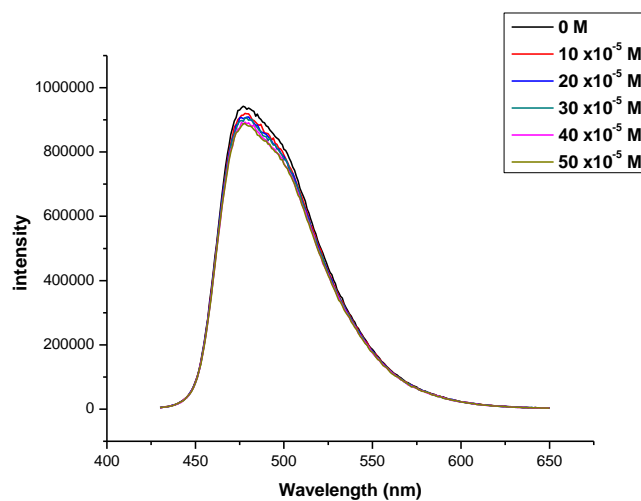

**Figure S9.** A solution of PhSH in DMSO was added and its concentration was changed from 0 to  $50 \times 10^{-5}\text{ M}$

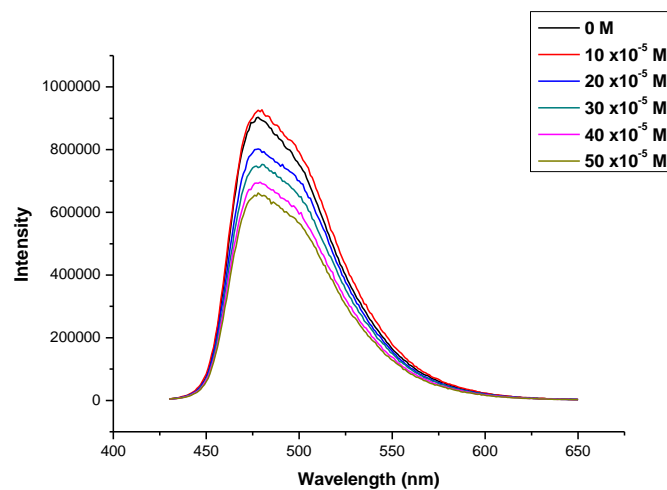

**Figure S10.** A solution of **1a** in DMSO was added and its concentration was changed from 0 to  $50 \times 10^{-5} \text{ M}$

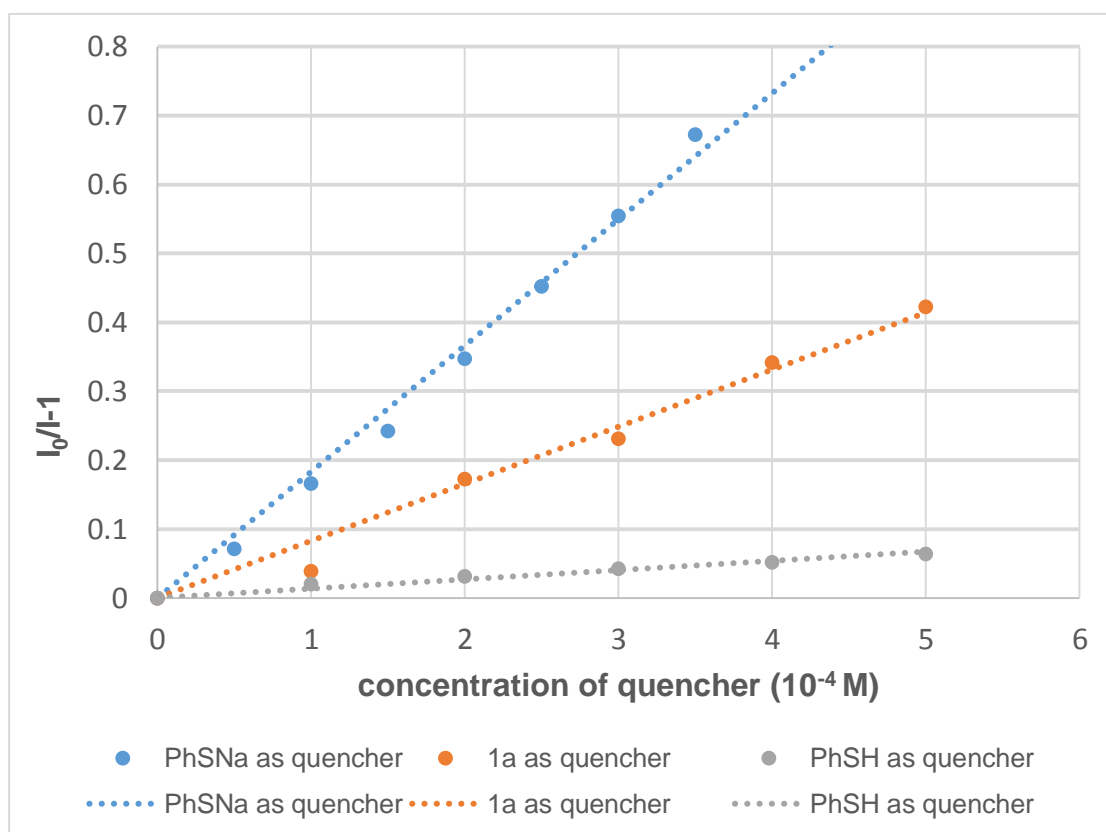

**Figure S11.** Stern-Volmer plot of  $[\text{Ir}(\text{dFCF}_3\text{ppy})_2\text{dtbbpy}]\text{PF}_6$  by different components

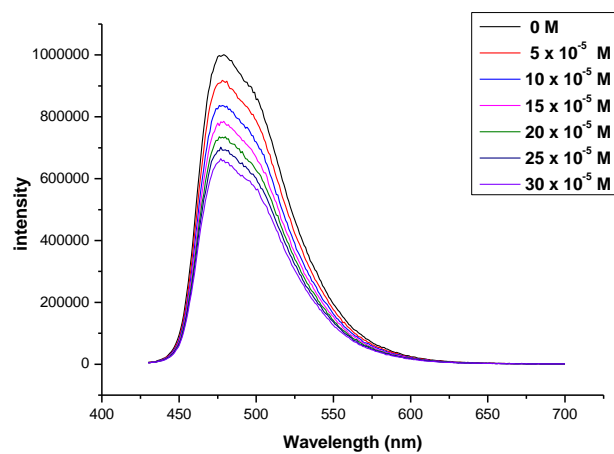

**Figure S12.** A solution of **8** ( $\text{CF}_3\text{SO}_2\text{Na}$ ) in DMSO was added and its concentration was changed from 0 to  $30 \times 10^{-5} \text{ M}$

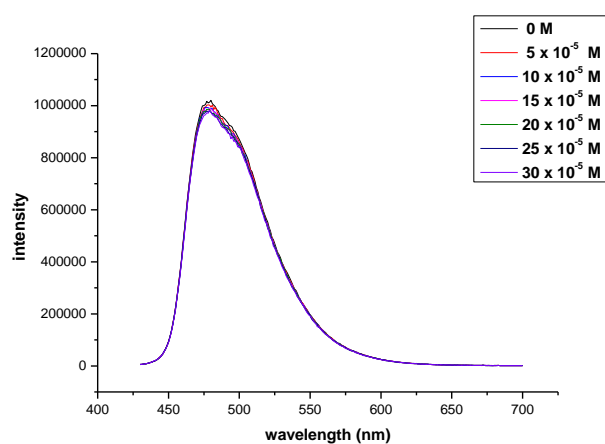

**Figure S13.** A solution of **7a** in DMSO was added and its concentration was changed from 0 to  $30 \times 10^{-5} \text{ M}$

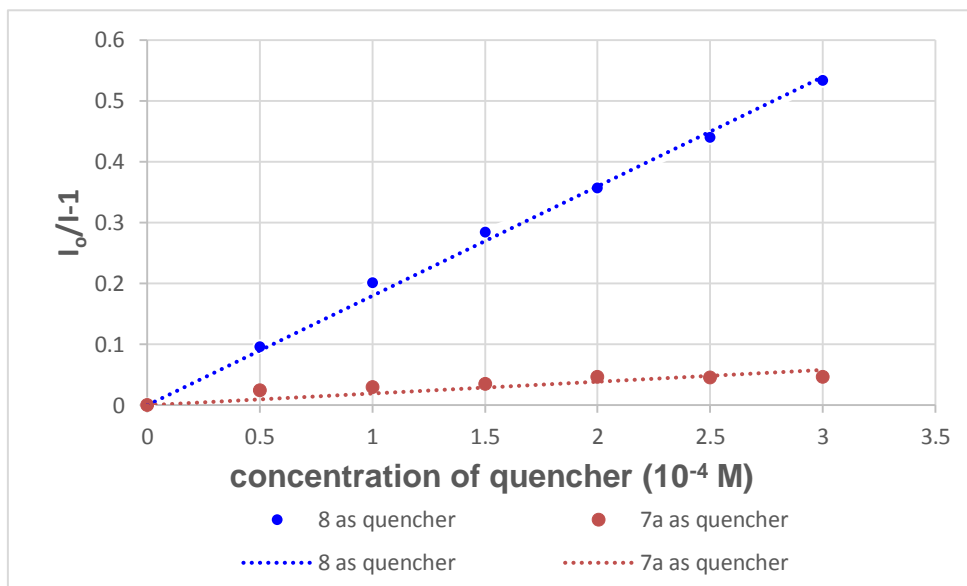

**Figure S14.** Stern-Volmer plot of [Ir(dFCF<sub>3</sub>ppy)<sub>2</sub>dtbbpy]PF<sub>6</sub> by different components

**Scheme S1. Testing other radical precursors in the photoredox catalytic Wolff-Kishner processes**

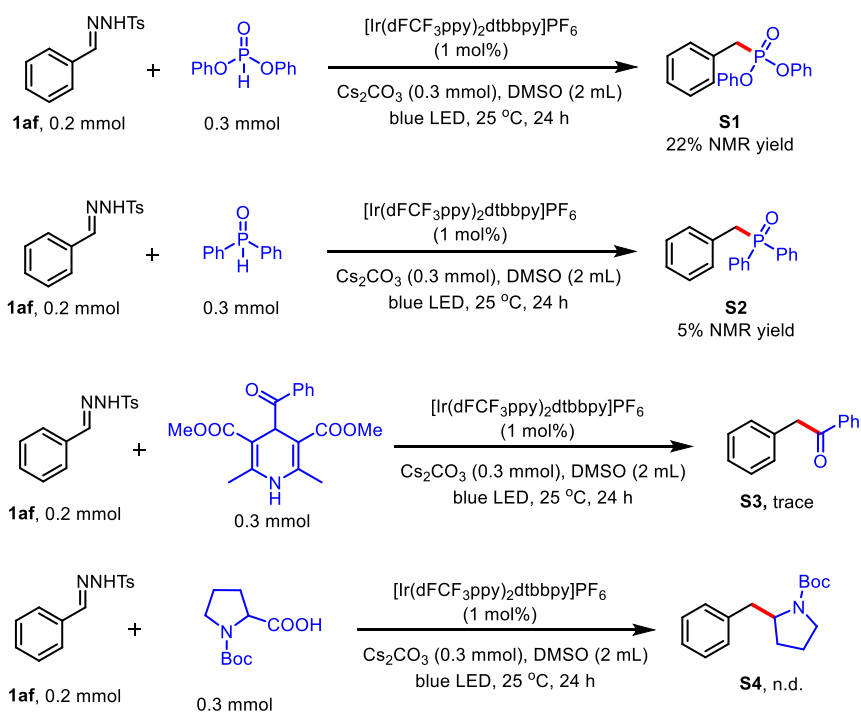

In addition to  $CF_3SO_2Na$  and thiols, other radical precursors including phosphite, phosphine oxide, 1,4-dihydropyridine and carboxylic acid are tested in this photocatalytic radical-anion relay sequence. As summarized in **Scheme S1**, under the unoptimized reaction conditions phosphite, phosphine oxide and dihydropyridine could react with N-tosylhydrazone **1af** to give corresponding carbanions which are then trapped by the protons in the reaction mixture. These results demonstrated that this novel strategy could be further extended in the production and transformation of other functionalized carbanions. Further studies along this lines are currently underway in our laboratory.

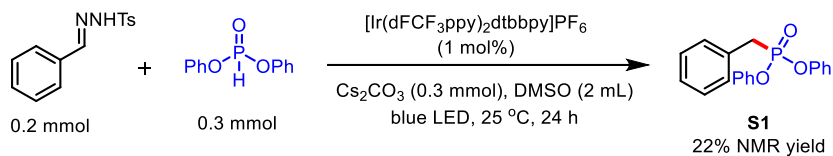

File :M:\GCMS\_TEMP\Wang\G4016\_03.D  
 Operator :  
 Acquired : 18 Mar 2020 03:37 using AcqMethod G4016\_INT\_00.M  
 Instrument : Intuvo MSD  
 Sample Name : SC-MR-3  
 Misc Info : Wang  
 Vial Number : 29

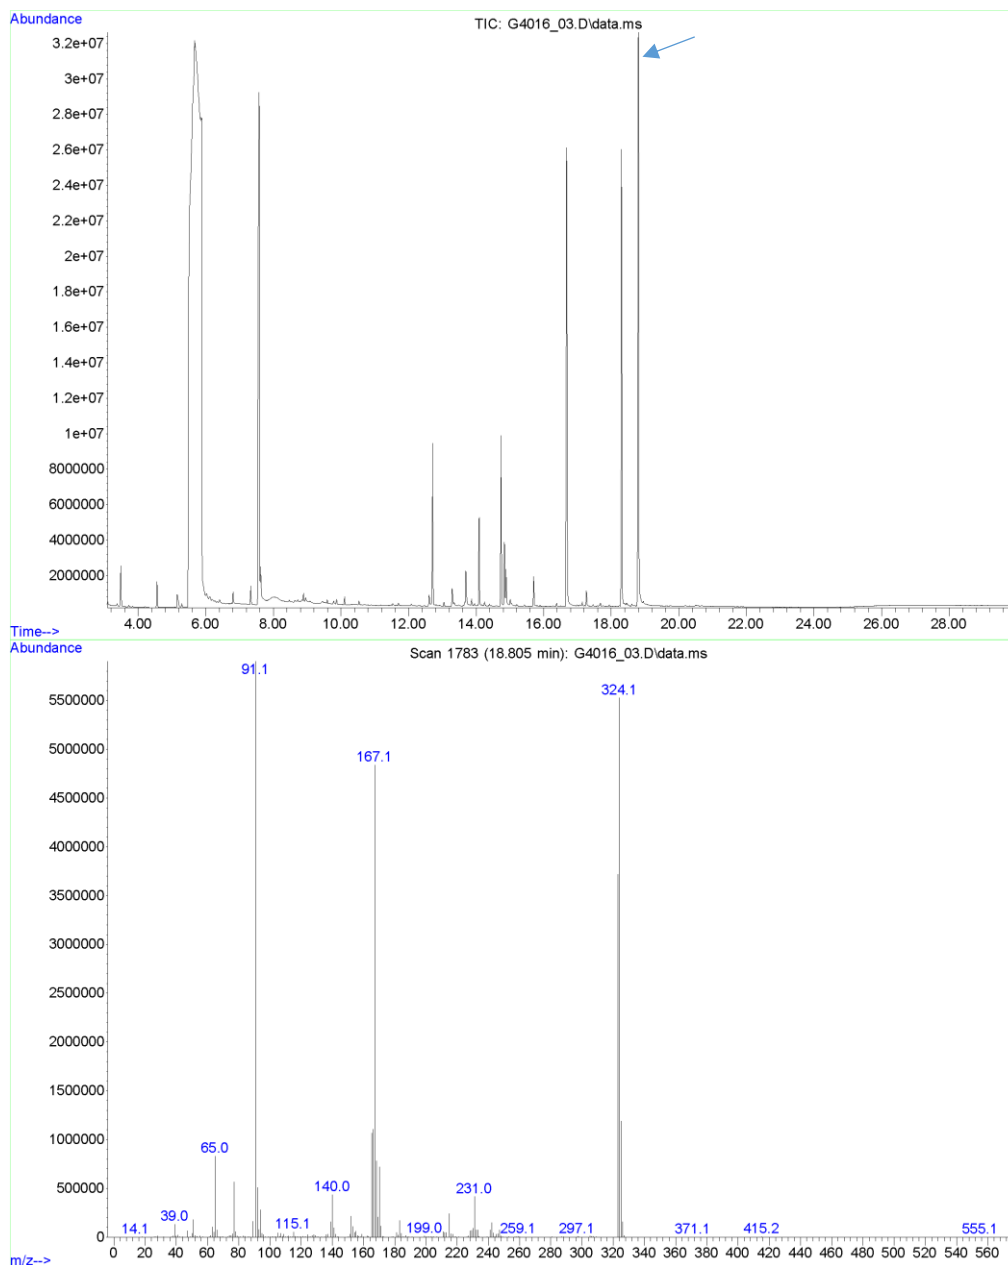

**Figure S15.** GC-MS report of product **S1**

**Figure S16.** Crude  $^1\text{H}$  NMR spectrum of the reaction between **1af** and diphenylphosphite<sup>4</sup>

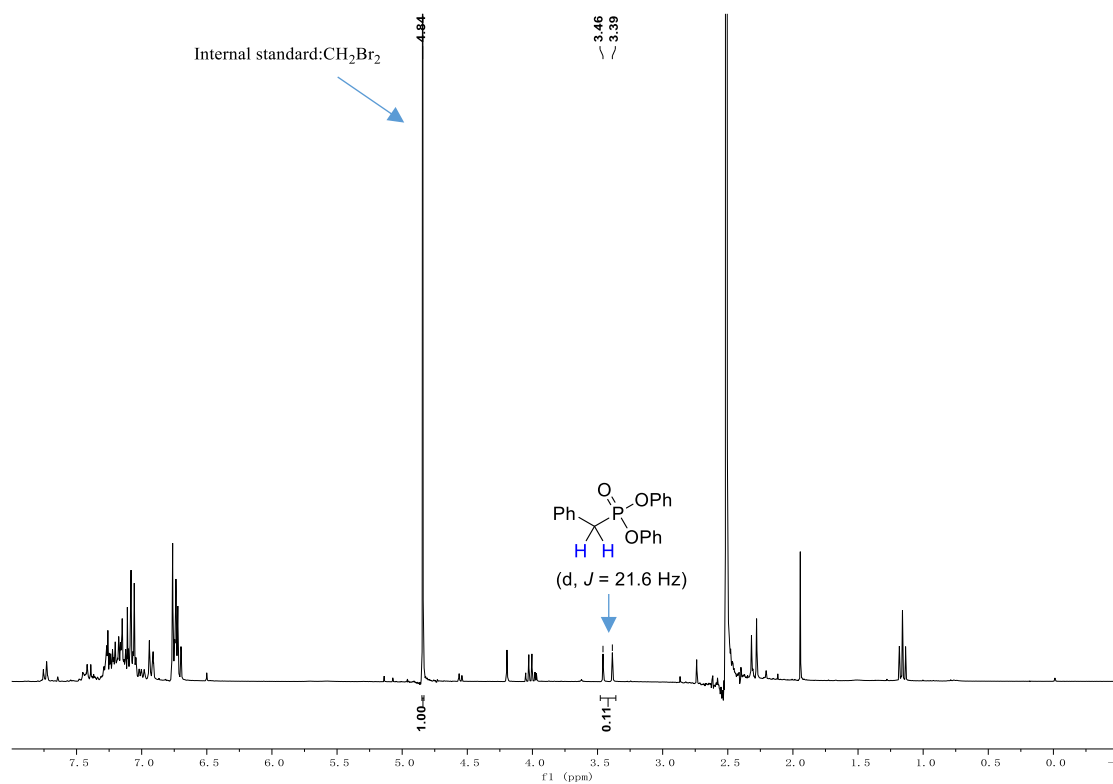

**Figure S17.** Crude  $^1\text{H}$  NMR spectrum of the reaction between **1af** and diphenylphosphite<sup>4</sup>



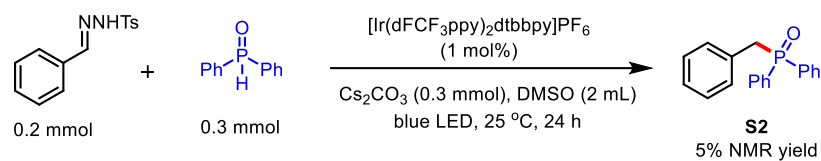

File : M:\GCMS\_TEMP\Wang\G4016\_04.D  
 Operator :  
 Acquired : 18 Mar 2020 04:12 using AcqMethod G4016\_INT\_00.M  
 Instrument : Intuvo MSD  
 Sample Name : SC-MR-4  
 Misc Info : Wang  
 Vial Number : 30

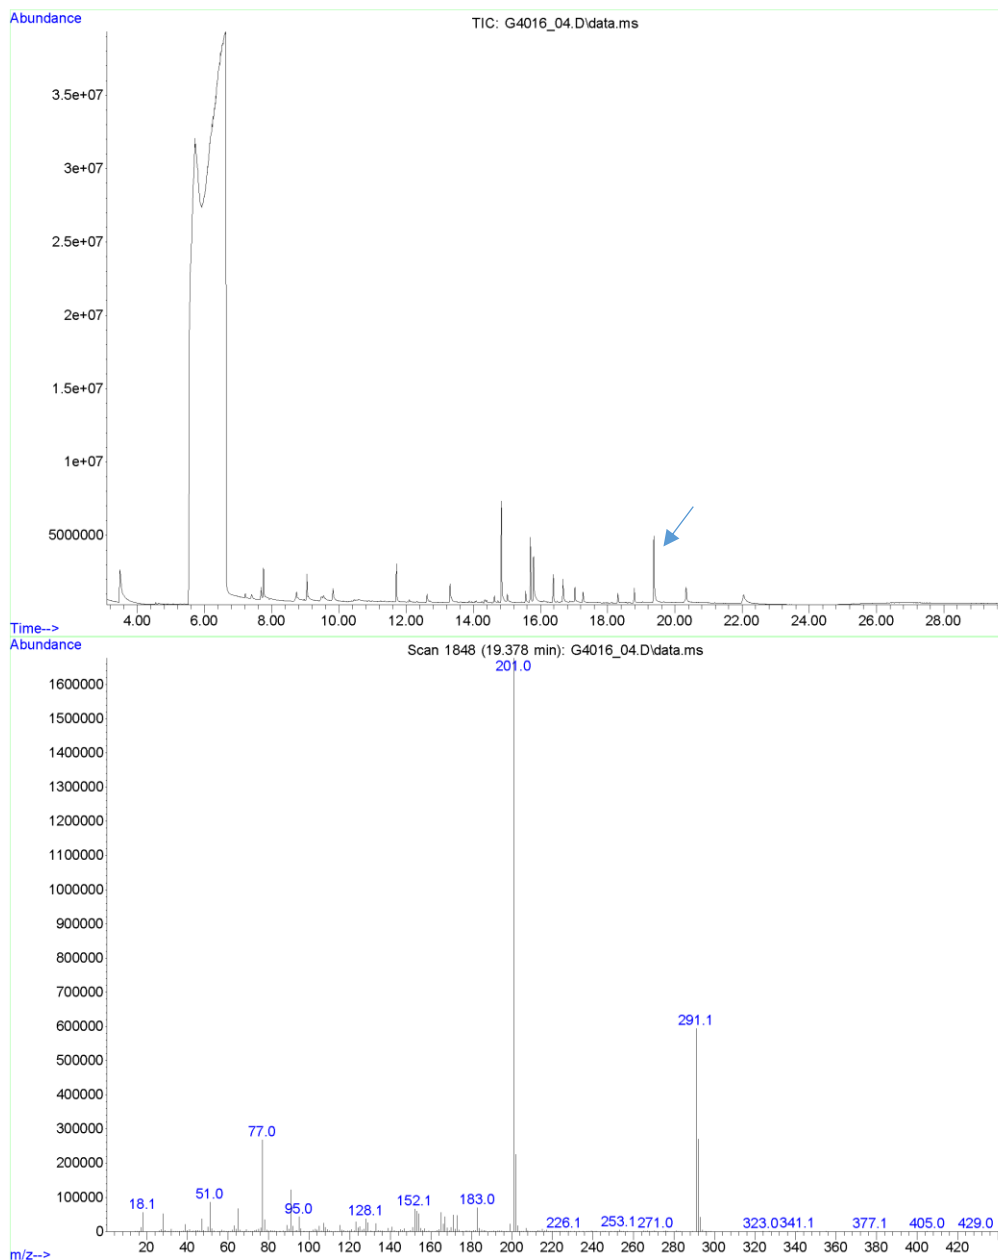

**Figure S18.** GC-MS report of product **S2**

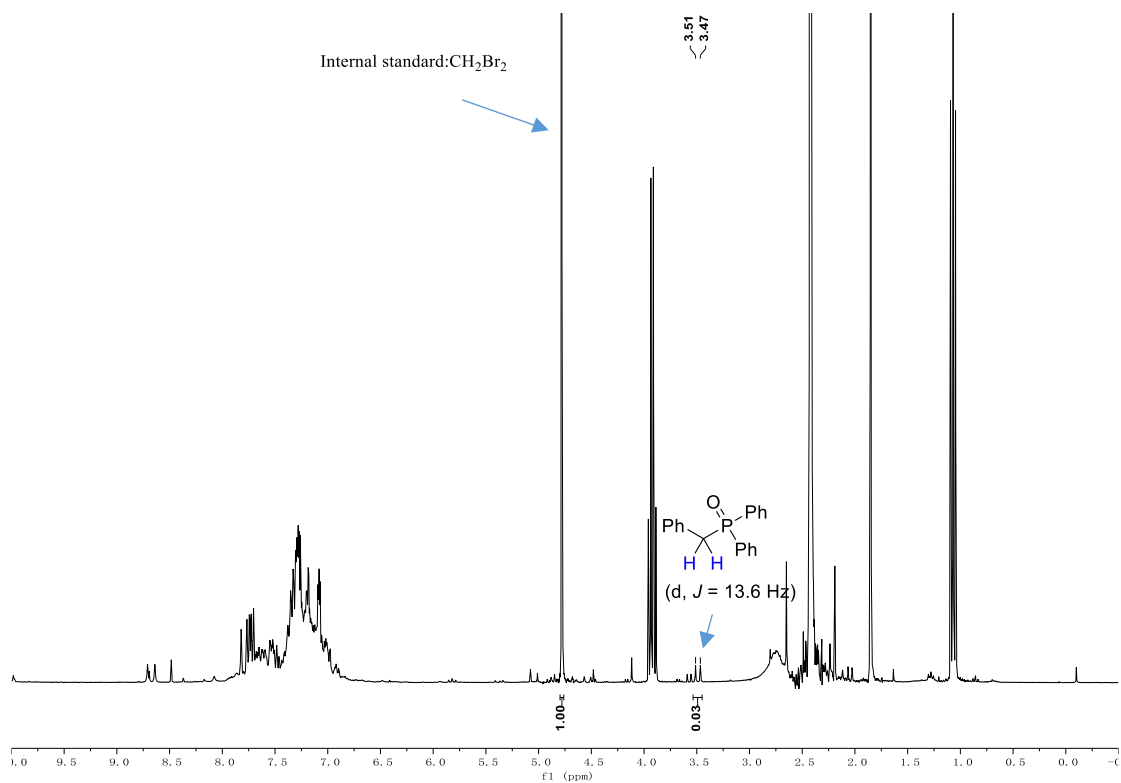

**Figure S19.** Crude <sup>1</sup>H NMR spectrum of the reaction between **1af** and diphenylphosphine oxide<sup>5</sup>

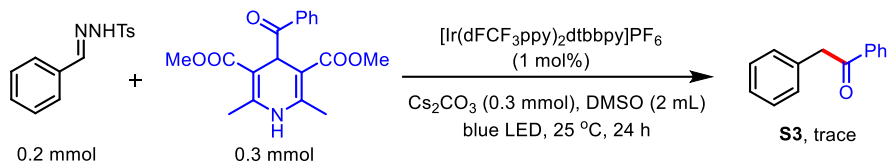

File : M:\GCMS\_TEMP\Wang\G4016\_01.D  
 Operator :  
 Acquired : 18 Mar 2020 02:28 using AcqMethod G4016\_INT\_00.M  
 Instrument : Intuvo MSD  
 Sample Name : SC-MR-1-1  
 Misc Info : Wang  
 Vial Number : 27

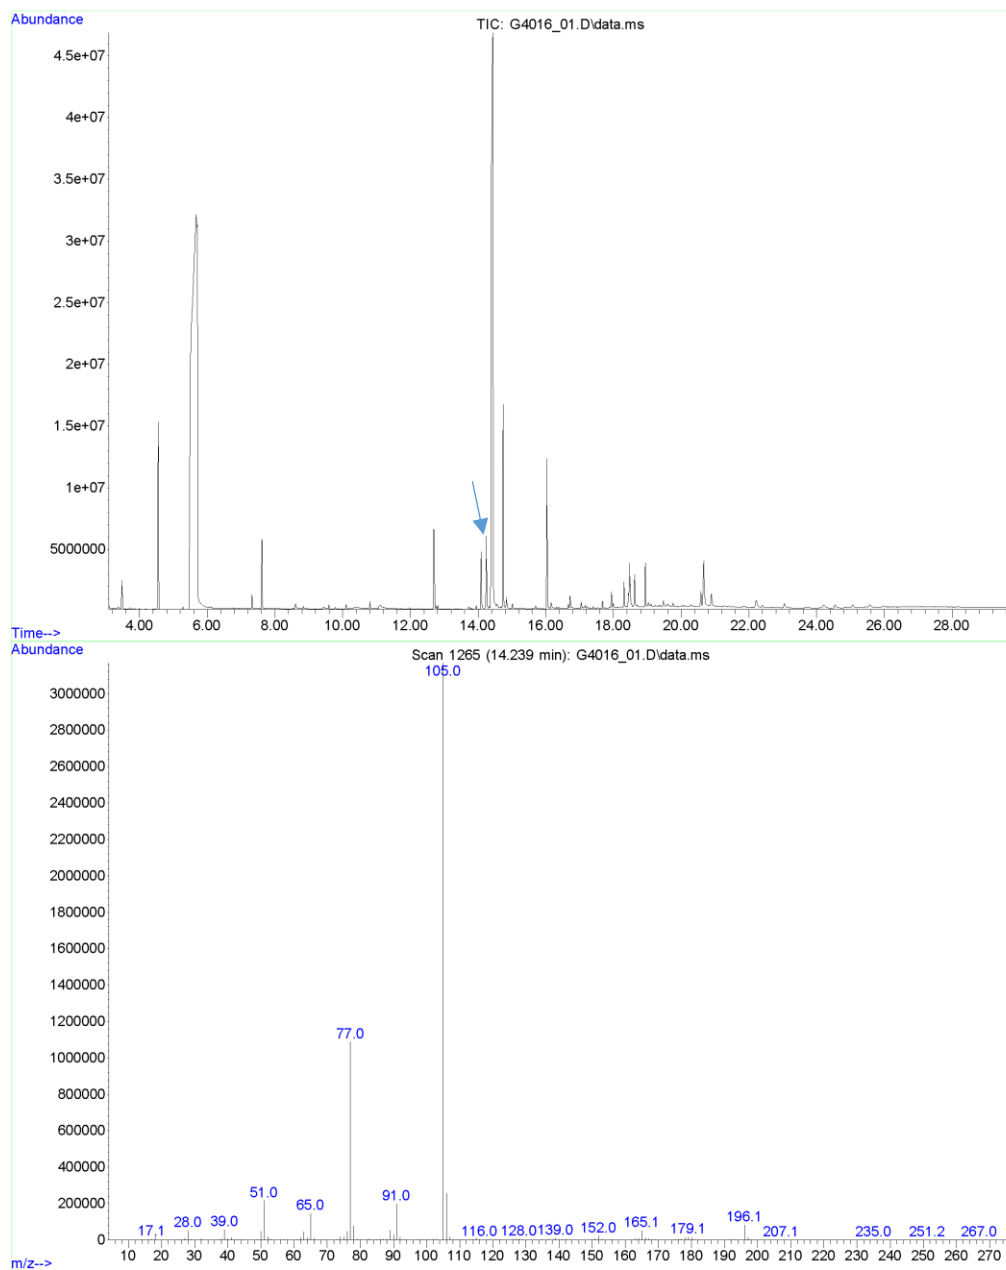

**Figure S20.** GC-MS report of product **S3**

**Table S8. Diastereoselectivity of  $\alpha$ -sulfenyl carbanion addition to benzaldehyde<sup>a</sup>**

| Entry | Base                            | Additive           | Yield of 6a | Syn:Anti <sup>b</sup> |
|-------|---------------------------------|--------------------|-------------|-----------------------|
| 1     | Cs <sub>2</sub> CO <sub>3</sub> | -                  | 78%         | 44:56                 |
| 2     | Li <sub>2</sub> CO <sub>3</sub> | -                  | 15%         | 44:56                 |
| 3     | MgCO <sub>3</sub>               | -                  | n.d.        | -                     |
| 4     | Cs <sub>2</sub> CO <sub>3</sub> | MgClO <sub>4</sub> | 25%         | 43:57                 |
| 5     | Cs <sub>2</sub> CO <sub>3</sub> | LiCl               | 80%         | 51:49                 |

<sup>a</sup>Reaction conditions: Unless otherwise noted, all reactions were carried out with **1af** (0.2 mmol), **2a** (0.3 mmol), **5** (0.8 mmol), base (0.3 mmol), [Ir(dFCF<sub>3</sub>ppy)<sub>2</sub>dtbbpy]PF<sub>6</sub> (1 mol%) in 2 mL DMSO, irradiation with blue LED (455 nm) at 25 °C for 24 hours, NMR yields were shown. <sup>b</sup>Determined by <sup>1</sup>H NMR analysis.

Regarding the diastereoselectivity of  $\alpha$ -sulfenyl carbanion addition to benzaldehyde, we attempted to improve the syn/anti ratio by adding chelating bases or additives. We tested commonly used chelating metal cation including Li<sup>+</sup> and Mg<sup>2+</sup> in this reaction. As demonstrated above, when Cs<sub>2</sub>CO<sub>3</sub> was replaced by Li<sub>2</sub>CO<sub>3</sub> or MgCO<sub>3</sub>, the reaction efficiencies dropped dramatically whereas the diastereoselectivity remained unchanged. Adding MgClO<sub>4</sub> (1.5 eq) did not improve diastereoselectivity but decreased the yield significantly. Moreover, using LiCl as additive afforded the product in retained efficiency and poor diastereoselectivity.

## 6. Characterization of products

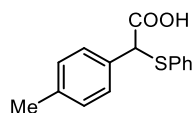

### 2-(phenylthio)-2-(p-tolyl)acetic acid (3a)

Following the general procedure A, the product was obtained as a white solid, 41.2 mg, 81% yield; mp 108.3-110.6 °C.  $^1\text{H NMR}$  (300 MHz,  $\text{CDCl}_3$ )  $\delta$  7.41 – 7.36 (m, 2H), 7.36 – 7.30 (m, 2H), 7.28 – 7.24 (m, 3H), 7.14 (d,  $J = 7.8$  Hz, 2H), 4.87 (s, 1H), 2.34 (s, 3H).  $^{13}\text{C NMR}$  (75 MHz,  $\text{CDCl}_3$ )  $\delta$  175.69, 138.47, 133.56, 132.38, 131.90, 129.47, 129.05, 128.36, 128.03, 55.83, 21.16. **HRMS** (ESI) Calcd. for  $[\text{M}+\text{H}]^+$ : 259.0787. Found: 259.0791.

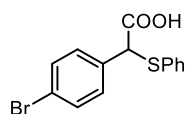

### 2-(4-bromophenyl)-2-(phenylthio)acetic acid (3b)

Following the general procedure A, the product was obtained as a white solid, 42.4 mg, 66% yield. mp 110.5-114.8 °C.  $^1\text{H NMR}$  (300 MHz,  $\text{CDCl}_3$ )  $\delta$  9.12 (s, 1H), 7.41 – 7.33 (m, 2H), 7.32 – 7.25 (m, 2H), 7.25 – 7.13 (m, 5H), 4.74 (s, 1H).  $^{13}\text{C NMR}$  (75 MHz,  $\text{CDCl}_3$ )  $\delta$  175.86, 134.08, 132.97, 132.66, 131.85, 130.21, 129.15, 128.50, 122.70, 55.63. **HRMS** (ESI) Calcd. for  $[\text{M}+\text{H}]^+$ : 322.9736. Found: 322.9737.

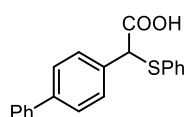

### 2-([1,1'-biphenyl]-4-yl)-2-(phenylthio)acetic acid (3c)

Following the general procedure A, the product was obtained as a white solid, 38.7 mg, 60% yield. mp 150.4-154.6 °C.  $^1\text{H NMR}$  (300 MHz,  $\text{CDCl}_3$ )  $\delta$  9.07 (s, 1H), 7.61 – 7.50 (m, 6H), 7.48 – 7.33 (m, 5H), 7.31 – 7.27 (m, 3H), 4.95 (s, 1H).  $^{13}\text{C NMR}$  (75 MHz,  $\text{CDCl}_3$ )  $\delta$  176.31, 141.45, 140.31, 133.89, 133.29, 132.64, 129.10, 128.94, 128.78, 128.22, 127.53, 127.46, 127.07, 55.94. **HRMS** (ESI) Calcd. for  $[\text{M}+\text{NH}_4]^+$ : 338.1209. Found: 338.1214.

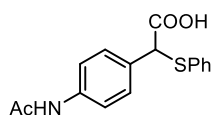

### 2-(4-acetamidophenyl)-2-(phenylthio)acetic acid (3d)

Following the general procedure A, the product was obtained as a white solid, 45.6 mg, 76% yield. mp 212.3-215.1 °C.  $^1\text{H NMR}$  (400 MHz,  $\text{DMSO}-d_6$ )  $\delta$  9.98 (s, 1H), 7.56 – 7.51 (m, 2H), 7.41 – 7.33 (m, 4H), 7.32 – 7.25 (m, 2H), 7.24 – 7.19 (m, 1H), 5.17 (s, 1H), 2.03 (s, 3H).  $^{13}\text{C NMR}$  (101 MHz,  $\text{DMSO}-d_6$ )  $\delta$  171.28, 168.39, 139.11, 134.36, 130.55, 130.40, 129.02, 128.80, 127.04, 118.99, 54.20, 24.02. **HRMS** (ESI) Calcd. for  $[\text{M}+\text{H}]^+$ : 302.0845. Found: 302.0852.

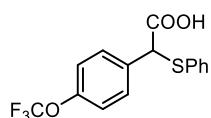

### 2-(phenylthio)-2-(4-(trifluoromethoxy)phenyl)acetic acid (3e)

Following the general procedure A, the product was obtained as a white solid, 43.2 mg, 66% yield. mp 78.9-83.2 °C.  $^1\text{H NMR}$  (300 MHz,  $\text{CDCl}_3$ )  $\delta$  8.18 (s, 1H), 7.42 – 7.34 (m, 2H), 7.32 – 7.25 (m, 2H), 7.22 – 7.14 (m, 3H), 7.13 – 7.05 (m, 2H), 4.79 (s, 1H).  $^{13}\text{C NMR}$  (75 MHz,  $\text{CDCl}_3$ )  $\delta$  175.88, 149.20 (q,  $J = 2.1$  Hz), 133.68, 133.08, 132.59, 130.11, 129.16, 128.57, 121.06, 55.43.  $^{19}\text{F NMR}$  (282 MHz,  $\text{CDCl}_3$ )  $\delta$  -58.32. **HRMS** (ESI) Calcd. for  $[\text{M}+\text{H}]^+$ : 329.0454. Found: 329.0456.

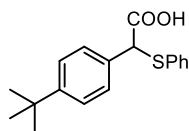

### 2-(4-(tert-butyl)phenyl)-2-(phenylthio)acetic acid (3f)

Following the general procedure, the product was obtained as a white solid, 43.3 mg, 72% yield. mp 105.7-110.8 °C.  $^1\text{H NMR}$  (400 MHz,  $\text{CDCl}_3$ )  $\delta$  8.42 (s, 1H), 7.35 – 7.25 (m, 6H), 7.20 – 7.14 (m, 3H), 4.79 (s, 1H), 1.22 (s, 9H).  $^{13}\text{C NMR}$  (101 MHz,  $\text{CDCl}_3$ )  $\delta$  176.42, 151.63, 133.74, 132.27, 131.71, 129.05, 128.14, 127.99, 125.75, 55.76, 34.59, 31.24. **HRMS** (ESI) Calcd. for  $[\text{M}+\text{NH}_4]^+$ : 318.1522. Found: 318.1529.

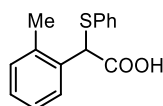

### 2-(phenylthio)-2-(o-tolyl)acetic acid (3g)

Following the general procedure A, the product was obtained as a yellow gel-like solid, 42.2 mg, 82% yield.  $^1\text{H NMR}$  (400 MHz,  $\text{CDCl}_3$ )  $\delta$  8.57 (s, 1H), 7.50 – 7.44 (m, 1H), 7.31 (dd,  $J = 6.5, 2.9$  Hz, 2H), 7.21 – 7.15 (m, 3H), 7.14 – 7.05 (m, 3H), 5.05 (s, 1H), 2.28 (s, 3H).  $^{13}\text{C NMR}$  (101 MHz,  $\text{CDCl}_3$ )  $\delta$  176.41, 136.24, 133.63, 133.34, 132.58, 130.61, 129.06, 128.39, 128.25, 128.13, 126.60, 52.67, 19.50. **HRMS** (ESI) Calcd. for  $[\text{M}+\text{H}]^+$ : 259.0787. Found: 259.0787.

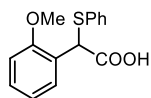

### 2-(phenylthio)-2-(o-tolyl)acetic acid (3h)

Following the general procedure A, the product was obtained as yellow gel-like solid, 36.9 mg, 67% yield.  $^1\text{H NMR}$  (400 MHz,  $\text{CDCl}_3$ )  $\delta$  7.97 (s, 1H), 7.40 (dd,  $J = 7.7, 1.7$  Hz, 1H), 7.37 – 7.29 (m, 2H), 7.21 – 7.14 (m, 4H), 6.86 (td,  $J = 7.5, 1.1$  Hz, 1H), 6.79 (dd,  $J = 8.3, 1.1$  Hz, 1H), 5.30 (s, 1H), 3.72 (s, 3H).  $^{13}\text{C NMR}$  (101 MHz,  $\text{CDCl}_3$ )  $\delta$  176.22, 156.44, 134.04, 132.37, 129.59, 129.41, 128.89, 127.80, 123.85, 120.86, 110.86, 55.69, 49.53. **HRMS** (ESI) Calcd. for  $[\text{M}+\text{H}]^+$ : 275.0739. Found: 275.0736.

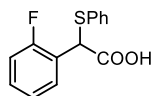

### 2-(2-fluorophenyl)-2-(phenylthio)acetic acid (3i)

Following the general procedure A, the product was obtained as yellow gel-like solid, 30.2 mg, 58% yield.  $^1\text{H NMR}$  (400 MHz,  $\text{CDCl}_3$ )  $\delta$  10.69 (s, 1H), 7.48 (td,  $J = 7.6, 1.8$  Hz, 1H), 7.35 – 7.30 (m, 2H),

7.23 – 7.14 (m, 4H), 7.04 (td,  $J = 7.6, 1.3$  Hz, 1H), 6.95 (ddd,  $J = 9.7, 8.2, 1.2$  Hz, 1H), 5.17 (s, 1H).  $^{13}\text{C}$  NMR (101 MHz,  $\text{CDCl}_3$ )  $\delta$  175.87, 161.15, 158.68, 133.10, 132.78, 130.09 (d,  $J = 8.4$  Hz), 130.01 (d,  $J = 2.6$  Hz), 129.08, 128.46, 124.42 (d,  $J = 3.6$  Hz), 122.66 (d,  $J = 13.9$  Hz), 115.43 (d,  $J = 21.8$  Hz), 48.39 (d,  $J = 3.2$  Hz). HRMS (ESI) Calcd. for  $[\text{M}+\text{H}]^+$ : 263.0538. Found: 263.0537.

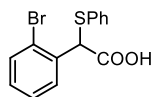

### 2-(2-bromophenyl)-2-(phenylthio)acetic acid (3j)

Following the general procedure A, the product was obtained as yellow gel-like solid, 40.4 mg, 63% yield.  $^1\text{H}$  NMR (400 MHz,  $\text{CDCl}_3$ )  $\delta$  7.57 (dd,  $J = 7.9, 1.7$  Hz, 1H), 7.48 (dd,  $J = 8.0, 1.3$  Hz, 1H), 7.39 – 7.32 (m, 2H), 7.24 – 7.18 (m, 4H), 7.09 (td,  $J = 7.7, 1.7$  Hz, 1H), 5.40 (s, 1H).  $^{13}\text{C}$  NMR (101 MHz,  $\text{CDCl}_3$ )  $\delta$  174.98, 134.84, 133.03, 132.95, 132.84, 130.26, 129.80, 129.09, 128.42, 127.85, 124.49, 54.92. HRMS (ESI) Calcd. for  $[\text{M}+\text{H}]^+$ : 322.9737. Found: 322.9736.

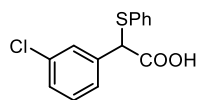

### 2-(3-chlorophenyl)-2-(phenylthio)acetic acid (3k)

Following the general procedure A, the product was obtained as a yellow gel-like solid, 35.6 mg, 64% yield.  $^1\text{H}$  NMR (300 MHz,  $\text{CDCl}_3$ )  $\delta$  8.95 (s, 1H), 7.45 (t,  $J = 1.8$  Hz, 1H), 7.40 – 7.35 (m, 2H), 7.33 – 7.23 (m, 6H), 4.82 (s, 1H).  $^{13}\text{C}$  NMR (75 MHz,  $\text{CDCl}_3$ )  $\delta$  175.78, 136.93, 134.53, 133.01, 132.62, 129.90, 129.16, 128.72, 128.69, 128.54, 126.77, 55.74. HRMS (ESI) Calcd. for  $[\text{M}-\text{H}]^-$ : 277.0092. Found: 277.0096.

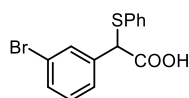

### 2-(3-bromophenyl)-2-(phenylthio)acetic acid (3l)

Following the general procedure A, the product was obtained as a white solid, 40.3 mg, 63% yield, mp 92.8 - 93.5 °C.  $^1\text{H}$  NMR (400 MHz,  $\text{CDCl}_3$ )  $\delta$  7.59 (d,  $J = 1.8$  Hz, 1H), 7.46 (d,  $J = 7.9$  Hz, 1H), 7.37 (t,  $J = 7.7$  Hz, 3H), 7.32 – 7.26 (m, 3H), 7.20 (t,  $J = 7.9$  Hz, 1H), 6.27 (s, 1H), 4.82 (s, 1H).  $^{13}\text{C}$  NMR (101 MHz,  $\text{CDCl}_3$ )  $\delta$  175.09, 137.26, 133.05, 132.66, 131.64, 131.59, 130.18, 129.17, 128.57, 127.24, 122.65, 55.67. HRMS (ESI) Calcd. for  $[\text{M}+\text{H}]^+$ : 322.9735. Found: 322.9736.

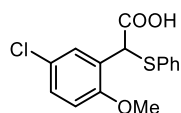

### 2-(5-chloro-2-methoxyphenyl)-2-(phenylthio)acetic acid (3m)

Following the general procedure A, the product was obtained as a white solid, 35.2 mg, 57% yield, mp 136.3-140.0 °C.  $^1\text{H}$  NMR (300 MHz,  $\text{CDCl}_3$ )  $\delta$  8.06 (s, 1H), 7.46 (d,  $J = 2.6$  Hz, 1H), 7.45 – 7.37 (m, 2H), 7.31 – 7.26 (m, 3H), 7.23 (dd,  $J = 8.8, 2.6$  Hz, 1H), 6.79 (d,  $J = 8.8$  Hz, 1H), 5.30 (s, 1H), 3.77 (s, 3H).  $^{13}\text{C}$  NMR (75 MHz,  $\text{CDCl}_3$ )  $\delta$  175.96, 155.06, 133.29, 132.79, 129.39, 129.24, 128.99, 128.21, 125.75, 125.54, 111.96, 55.99, 49.05. HRMS (ESI) Calcd. for  $[\text{M}+\text{H}]^+$ : 309.0347. Found: 309.0353.

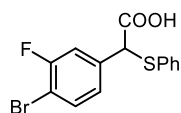

### 2-(4-bromo-3-fluorophenyl)-2-(phenylthio)acetic acid (3n)

Following the general procedure A, the product was obtained as a white solid, 29.4 mg, 43% yield.  $^1\text{H NMR}$  (300 MHz,  $\text{CDCl}_3$ )  $\delta$  9.51 (s, 1H), 7.53 – 7.46 (m, 1H), 7.37 – 7.32 (m, 2H), 7.31 – 7.23 (m, 4H), 7.09 – 7.04 (m, 1H), 4.80 (s, 1H).  $^{13}\text{C NMR}$  (75 MHz,  $\text{CDCl}_3$ )  $\delta$  175.40, 158.94 (d,  $J = 248.4$  Hz), 136.72 (d,  $J = 6.8$  Hz), 133.59, 133.16, 132.24, 129.23, 128.74, 125.44 (d,  $J = 3.5$  Hz), 116.76 (d,  $J = 23.7$  Hz), 109.30 (d,  $J = 21.0$  Hz), 55.43.  $^{19}\text{F NMR}$  (282 MHz,  $\text{CDCl}_3$ )  $\delta$  -106.44. **HRMS** (ESI) Calcd. for  $[\text{M}+\text{H}]^+$ : 340.9642. Found: 340.9644.

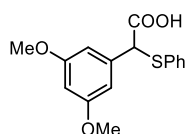

### 2-(3,5-dimethoxyphenyl)-2-(phenylthio)acetic acid (3o)

Following the general procedure A, the product was obtained as a white solid, 35.1 mg, 58% yield. mp 115.3-119.9 °C.  $^1\text{H NMR}$  (400 MHz,  $\text{CDCl}_3$ )  $\delta$  9.55 (s, 1H), 7.33 – 7.27 (m, 2H), 7.19 – 7.16 (m, 3H), 6.51 (d,  $J = 2.3$  Hz, 2H), 6.32 (t,  $J = 2.3$  Hz, 1H), 4.71 (s, 1H), 3.67 (s, 6H).  $^{13}\text{C NMR}$  (101 MHz,  $\text{CDCl}_3$ )  $\delta$  175.89, 160.86, 136.97, 133.37, 132.52, 129.08, 128.16, 106.54, 100.76, 56.35, 55.40. **HRMS** (ESI) Calcd. for  $[\text{M}+\text{H}]^+$ : 305.0842. Found: 305.0846.

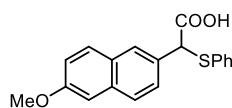

### 2-(6-methoxynaphthalen-2-yl)-2-(phenylthio)acetic acid (3p)

Following the general procedure A, the product was obtained as a white solid, 41.2 mg, 64% yield. mp 162.8-168.4 °C.  $^1\text{H NMR}$  (300 MHz,  $\text{CDCl}_3$ )  $\delta$  8.45 (s, 1H), 7.78 – 7.64 (m, 3H), 7.57 (dd,  $J = 8.5$ , 1.9 Hz, 1H), 7.41 – 7.35 (m, 2H), 7.26 – 7.20 (m, 3H), 7.17 – 7.08 (m, 2H), 5.02 (s, 1H), 3.92 (s, 3H).  $^{13}\text{C NMR}$  (75 MHz,  $\text{CDCl}_3$ )  $\delta$  176.17, 158.12, 134.38, 133.37, 132.62, 129.86, 129.53, 129.05, 128.53, 128.14, 127.63, 127.48, 126.46, 119.25, 105.57, 56.36, 55.31. **HRMS** (ESI) Calcd. for  $[\text{M}+\text{H}]^+$ : 325.0893. Found: 325.0901.

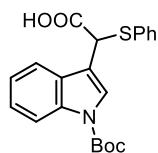

### 2-(1-(tert-butoxycarbonyl)-1H-indol-3-yl)-2-(phenylthio)acetic acid (3q)

Following the general procedure A, the product was obtained as a yellowish oil, 40.6 mg, 56% yield.  $^1\text{H NMR}$  (400 MHz,  $\text{CDCl}_3$ )  $\delta$  8.16 (d,  $J = 8.3$  Hz, 1H), 7.70 (d,  $J = 7.8$  Hz, 1H), 7.64 (s, 1H), 7.46 – 7.40 (m, 2H), 7.38 – 7.27 (m, 5H), 5.12 (s, 1H), 1.65 (s, 9H).  $^{13}\text{C NMR}$  (101 MHz,  $\text{CDCl}_3$ )  $\delta$  174.96, 149.34, 135.46, 133.26, 133.14, 129.03, 128.48, 128.43, 125.42, 124.90, 122.84, 119.40, 115.39, 113.75, 84.06, 47.68, 28.14. **HRMS** (ESI) Calcd. for  $[\text{M}-\text{H}]^-$ : 382.1119. Found: 382.1119.



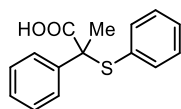

### 2-phenyl-2-(phenylthio)propanoic acid (3r)

Following the general procedure A, the product was obtained as a white solid, 31.2 mg, 62% yield. mp 96.4-98.9 °C.  $^1\text{H NMR}$  (300 MHz,  $\text{CDCl}_3$ )  $\delta$  7.57 – 7.50 (m, 2H), 7.39 -7.27 (m, 7H), 7.25 – 7.20 (m, 1H), 1.82 (s, 3H).  $^{13}\text{C NMR}$  (75 MHz,  $\text{CDCl}_3$ )  $\delta$  177.40 , 139.85 , 136.69 , 130.86 , 129.47 , 128.69 , 128.36 , 127.92 , 127.10 , 59.57 , 25.20 . **HRMS** (ESI) Calcd. for  $[\text{M}+\text{NH}_4]^+$ : 276.1053. Found: 276.1055.

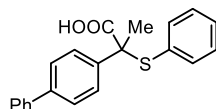

### 2-([1,1'-biphenyl]-4-yl)-2-(phenylthio)propanoic acid (3s)

Following the general procedure A, the product was obtained as a white solid, 52.9 mg, 79% yield. mp 138.4-142.3 °C.  $^1\text{H NMR}$  (300 MHz,  $\text{CDCl}_3$ )  $\delta$  8.90 (s, 1H), 7.56 – 7.46 (m, 6H), 7.39 – 7.21 (m, 6H), 7.19 – 7.11 (m, 2H), 1.77 (s, 3H).  $^{13}\text{C NMR}$  (75 MHz,  $\text{CDCl}_3$ )  $\delta$  178.57 , 140.68 , 140.28 , 138.80 , 136.75 , 130.91 , 129.48 , 128.78 , 128.69 , 127.62 , 127.48 , 127.04 , 126.95 , 59.21 , 25.00 . **HRMS** (ESI) Calcd. for  $[\text{M}+\text{NH}_4]^+$ : 352.1366. Found: 352.1373.

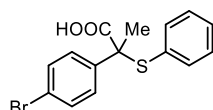

### 2-(4-bromophenyl)-2-(phenylthio)propanoic acid (3t)

Following the general procedure A, the product was obtained as a white solid, 38.3 mg, 57% yield. mp 111.7-114.5 °C.  $^1\text{H NMR}$  (400 MHz,  $\text{CDCl}_3$ )  $\delta$  8.99 (s, 1H), 7.41 – 7.31 (m, 4H), 7.27 (ddt,  $J$  = 10.0, 7.3, 1.6 Hz, 3H), 7.20 – 7.14 (m, 2H), 1.71 (s, 3H).  $^{13}\text{C NMR}$  (100 MHz,  $\text{CDCl}_3$ )  $\delta$  178.09 , 139.00 , 136.74 , 131.37 , 130.55 , 129.64 , 129.07 , 128.76 , 122.05 , 58.87 , 24.89 . **HRMS** (ESI) Calcd. for  $[\text{M}+\text{H}]^+$ : 336.9892. Found: 336.9889.

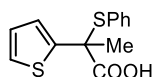

### 2-(phenylthio)-2-(thiophen-2-yl)propanoic acid (3u)

Following the general procedure A, the product was obtained as a white solid, 30.7 mg, 58% yield, mp 68.5 -69.6 °C.  $^1\text{H NMR}$  (400 MHz,  $\text{CDCl}_3$ )  $\delta$  7.43 – 7.36 (m, 3H), 7.32 – 7.26 (m, 3H), 7.14 (dd,  $J$  = 3.7, 1.2 Hz, 1H), 6.96 (dd,  $J$  = 5.1, 3.7 Hz, 1H), 1.92 (s, 3H).  $^{13}\text{C NMR}$  (101 MHz,  $\text{CDCl}_3$ )  $\delta$  176.91, 143.40, 136.69, 130.90, 129.81, 128.74, 126.95, 126.55, 126.12, 56.04, 25.72. **HRMS** (ESI) Calcd. for  $[\text{M}-\text{H}]^-$ : 263.0206. Found: 263.0213.

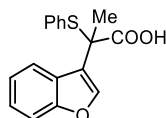

### 2-(benzofuran-3-yl)-2-(phenylthio)propanoic acid (3v)

Following the general procedure A, the product was obtained as a white solid, 30.6 mg, 51% yield, mp 131.5 - 133.0 °C.  $^1\text{H NMR}$  (400 MHz,  $\text{CDCl}_3$ )  $\delta$  7.51 (t,  $J$  = 8.5 Hz, 2H), 7.38 – 7.29 (m, 4H),

7.22 (dtd,  $J = 8.4, 4.1, 2.1$  Hz, 3H), 6.64 (d,  $J = 0.9$  Hz, 1H), 1.92 (s, 3H).  $^{13}\text{C}$  NMR (101 MHz,  $\text{CDCl}_3$ )  $\delta$  174.74, 154.75, 154.11, 137.13, 130.00, 129.87, 128.69, 127.80, 124.71, 122.95, 121.17, 111.31, 106.15, 55.09, 23.03. HRMS (ESI) Calcd. for  $[\text{M}+\text{H}]^+$ : 299.0736. Found: 299.0737.

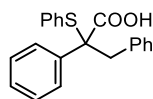

### 2,3-diphenyl-2-(phenylthio)propanoic acid (3w)

Following the general procedure A, the product was obtained as a oily solid, 42.1 mg, 63% yield.  $^1\text{H}$  NMR (400 MHz,  $\text{CDCl}_3$ )  $\delta$  7.32 – 7.28 (m, 2H), 7.26 – 7.15 (m, 6H), 7.14 – 7.00 (m, 5H), 6.83 (dt,  $J = 6.8, 1.5$  Hz, 2H), 3.40 (dd,  $J = 93.5, 13.7$  Hz, 2H).  $^{13}\text{C}$  NMR (101 MHz,  $\text{CDCl}_3$ )  $\delta$  176.41, 137.97, 136.21, 135.65, 130.92, 130.90, 129.37, 128.72, 128.51, 127.85, 127.66, 127.62, 126.76, 65.49, 44.50. HRMS (EI) Calcd. for  $[\text{M}-\text{H}]^-$ : 333.0955. Found: 333.0962.

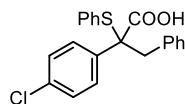

### 2-(4-chlorophenyl)-3-phenyl-2-(phenylthio)propanoic acid (3x)

Following the general procedure A, the product was obtained as a oily solid, 44.2 mg, 60% yield.  $^1\text{H}$  NMR (300 MHz,  $\text{CDCl}_3$ )  $\delta$  10.22 (s, 1H), 7.31 – 7.23 (m, 2H), 7.23 – 6.98 (m, 10H), 6.84 – 6.76 (m, 2H), 3.36 (dd,  $J = 92.5, 13.6$  Hz, 2H).  $^{13}\text{C}$  NMR (101 MHz,  $\text{CDCl}_3$ )  $\delta$  176.28, 136.48, 136.12, 135.27, 133.51, 130.83, 130.63, 130.17, 129.58, 128.82, 127.89, 127.80, 126.96, 64.87, 44.67. HRMS (ESI) Calcd. for  $[\text{M}+\text{H}]^+$ : 369.0711. Found: 369.0708.

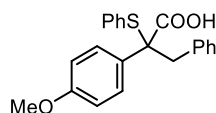

### 2-(4-methoxyphenyl)-3-phenyl-2-(phenylthio)propanoic acid (3y)

Following the general procedure A, the product was obtained as a oily solid, 44.8 mg, 62% yield.  $^1\text{H}$  NMR (300 MHz,  $\text{CDCl}_3$ )  $\delta$  7.85 (s, 1H), 7.41 – 7.36 (m, 2H), 7.35 – 7.10 (m, 8H), 6.97 – 6.86 (m, 2H), 6.84 – 6.75 (m, 2H), 3.81 (s, 3H), 3.46 (dd,  $J = 69.9, 13.5$  Hz, 2H).  $^{13}\text{C}$  NMR (75 MHz,  $\text{CDCl}_3$ )  $\delta$  176.88, 158.78, 136.13, 135.78, 131.07, 130.93, 129.97, 129.78, 129.29, 128.69, 127.61, 126.68, 113.14, 64.91, 55.26, 44.50. HRMS (ESI) Calcd. for  $[\text{M}+\text{Na}]^+$ : 387.1025. Found: 387.1027.

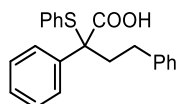

### 2,4-diphenyl-2-(phenylthio)butanoic acid (3z)

Following the general procedure A, the product was obtained as a oily solid, 51.9 mg, 75% yield.  $^1\text{H}$  NMR (300 MHz,  $\text{CDCl}_3$ )  $\delta$  8.53 (s, 1H), 7.41 – 7.34 (m, 2H), 7.31 – 7.14 (m, 8H), 7.13 – 7.00 (m, 5H), 2.67 (dtd,  $J = 50.4, 13.1, 4.7$  Hz, 2H), 2.29 (dddd,  $J = 33.5, 13.9, 12.1, 4.7$  Hz, 2H).  $^{13}\text{C}$  NMR (75 MHz,  $\text{CDCl}_3$ )  $\delta$  177.66, 141.31, 139.04, 136.48, 130.30, 129.47, 128.67, 128.40, 128.37, 128.31, 127.82, 127.52, 126.00, 64.53, 38.12, 31.29. HRMS (ESI) Calcd. for  $[\text{M}+\text{H}]^+$ : 349.1257. Found: 349.1259.

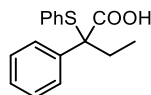

### 3-methyl-2-phenyl-2-(phenylthio)butanoic acid (3aa)

Following the general procedure A, the product was obtained as a yellow gel-like solid, 34.8 mg, 64% yield.  $^1\text{H NMR}$  (300 MHz,  $\text{CDCl}_3$ )  $\delta$  7.35 – 7.30 (m, 2H), 7.26 (d,  $J$  = 5.8 Hz, 2H), 7.23 – 7.20 (m, 2H), 7.18 – 7.07 (m, 4H), 2.16 – 1.91 (m, 2H), 0.94 (t,  $J$  = 7.3 Hz, 3H).  $^{13}\text{C NMR}$  (75 MHz,  $\text{CDCl}_3$ )  $\delta$  177.13, 139.04, 136.59, 130.43, 129.34, 128.58, 128.14, 127.62, 127.59, 65.55, 29.12, 9.27. **HRMS** (ESI) Calcd. for  $[\text{M-H}]^-$ : 271.0798. Found: 271.0801.

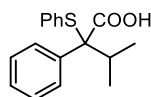

### 3-methyl-2-phenyl-2-(phenylthio)butanoic acid (3ab)

Following the general procedure A, the product was obtained as a white solid, mp 130.1-131.2 °C, 33.2 mg, 58% yield.  $^1\text{H NMR}$  (400 MHz,  $\text{CDCl}_3$ )  $\delta$  7.46 – 7.42 (m, 2H), 7.35 (d,  $J$  = 1.2 Hz, 1H), 7.33 – 7.31 (m, 2H), 7.28 (dd,  $J$  = 8.2, 1.6 Hz, 2H), 7.23 – 7.17 (m, 2H), 2.60 (p,  $J$  = 6.7 Hz, 1H), 1.00 (d,  $J$  = 6.7 Hz, 6H).  $^{13}\text{C NMR}$  (101 MHz,  $\text{CDCl}_3$ )  $\delta$  175.90, 135.99, 135.10, 131.26, 129.74, 129.25, 128.61, 127.42, 127.23, 70.22, 33.74, 19.36, 18.01. **HRMS** (ESI) Calcd. for  $[\text{M-H}]^-$ : 285.0955. Found: 285.0958.

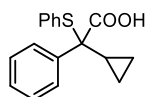

### 2-cyclopropyl-2-phenyl-2-(phenylthio)acetic acid (3ac)

Following the general procedure A, the product was obtained as a yellow gel-like solid, 45.1 mg, 79% yield.  $^1\text{H NMR}$  (400 MHz,  $\text{CDCl}_3$ )  $\delta$  7.43 – 7.38 (m, 2H), 7.37 – 7.32 (m, 2H), 7.24 (d,  $J$  = 7.8 Hz, 3H), 7.21 – 7.11 (m, 3H), 1.45 (ddd,  $J$  = 14.0, 8.4, 5.5 Hz, 1H), 0.51 (qq,  $J$  = 8.8, 4.4 Hz, 2H), 0.31 (dq,  $J$  = 10.5, 5.3, 4.8 Hz, 1H), 0.19 (dq,  $J$  = 8.6, 4.6, 4.1 Hz, 1H).  $^{13}\text{C NMR}$  (101 MHz,  $\text{CDCl}_3$ )  $\delta$  177.20, 136.67, 136.48, 130.92, 129.31, 129.06, 128.56, 127.83, 127.70, 66.06, 17.87, 4.25, 2.33. **HRMS** (ESI) Calcd. for  $[\text{M-H}]^-$ : 283.0798. Found: 283.0803.

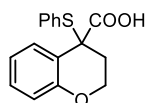

### 4-(phenylthio)chromane-4-carboxylic acid (3ad)

Following the general procedure A, the product was obtained as a white solid, mp 130.2 -131.4 °C, 24.3 mg, 43% yield.  $^1\text{H NMR}$  (400 MHz,  $\text{CDCl}_3$ )  $\delta$  7.75 (dd,  $J$  = 8.0, 1.5 Hz, 1H), 7.43 – 7.37 (m, 2H), 7.33 – 7.27 (m, 1H), 7.24 – 7.11 (m, 3H), 6.91 – 6.84 (m, 1H), 6.76 (dd,  $J$  = 8.3, 1.2 Hz, 1H), 4.32 (ddd,  $J$  = 11.4, 6.5, 3.2 Hz, 1H), 4.02 (ddd,  $J$  = 11.5, 8.9, 2.5 Hz, 1H), 2.47 (ddd,  $J$  = 14.4, 6.5, 2.5 Hz, 1H), 2.12 (ddd,  $J$  = 14.4, 8.9, 3.2 Hz, 1H).  $^{13}\text{C NMR}$  (101 MHz,  $\text{CDCl}_3$ )  $\delta$  177.23, 154.57, 136.66, 130.83, 130.49, 129.91, 129.84, 129.00, 120.52, 119.27, 117.37, 63.48, 53.80, 31.74. **HRMS** (ESI) Calcd. for  $[\text{M+Na}]^+$ : 309.0556. Found: 309.0556.

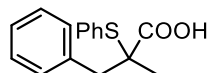

### 2-methyl-3-phenyl-2-(phenylthio)propanoic acid (3ae)

Following the slightly modified procedure A (reaction was conducted at 0 °C in 2 mL DMF, reaction time: 48 h), the product was obtained as a white solid, 26.5 mg, 49% yield. mp 101.5-105.3 °C. <sup>1</sup>H NMR (300 MHz, CDCl<sub>3</sub>) δ 7.42 – 7.27 (m, 6H), 7.26 – 7.14 (m, 4H), 6.50 (s, 1H), 2.21 – 2.00 (m, 2H), 1.01 (t, *J* = 7.2 Hz, 3H). <sup>13</sup>C NMR (75 MHz, CDCl<sub>3</sub>) δ 177.09, 139.03, 136.59, 130.43, 129.35, 128.58, 128.14, 127.63, 127.59, 65.55, 29.14, 9.27. HRMS (ESI) Calcd. for [M-H]<sup>-</sup>: 271.0798. Found: 271.0799.

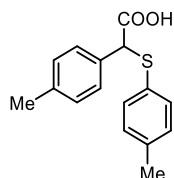

### 2-(p-tolyl)-2-(p-tolylthio)acetic acid (4a)

Following the general procedure A, the product was obtained as a white solid, 40.6 mg, 75% yield. mp 124.7-128.8 °C. <sup>1</sup>H NMR (300 MHz, CDCl<sub>3</sub>) δ 8.32 (s, 1H), 7.35 – 7.26 (m, 4H), 7.17 – 7.11 (m, 2H), 7.10 – 7.03 (m, 2H), 4.79 (s, 1H), 2.34 (s, 3H), 2.31 (s, 3H). <sup>13</sup>C NMR (75 MHz, CDCl<sub>3</sub>) δ 176.40, 138.44, 138.36, 133.12, 132.03, 129.83, 129.74, 129.41, 128.38, 56.35, 21.16. HRMS (ESI) Calcd. for [M+H]<sup>+</sup>: 273.0944. Found: 273.0951.

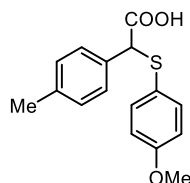

### 2-((4-methoxyphenyl)thio)-2-(p-tolyl)acetic acid (4b)

Following the general procedure A, the product was obtained as a white solid, 29.7 mg, 55% yield. mp 136.9-141.5 °C. <sup>1</sup>H NMR (400 MHz, CDCl<sub>3</sub>) δ 7.37 – 7.32 (m, 2H), 7.31 – 7.27 (m, 2H), 7.13 (d, *J* = 7.9 Hz, 2H), 6.83 – 6.75 (m, 2H), 4.71 (s, 1H), 3.78 (s, 3H), 2.34 (s, 3H). <sup>13</sup>C NMR (101 MHz, CDCl<sub>3</sub>) δ 176.34, 160.22, 138.27, 136.03, 132.12, 129.35, 128.43, 123.53, 114.58, 57.04, 55.28, 21.15. HRMS (ESI) Calcd. for [M+NH<sub>4</sub>]<sup>+</sup>: 306.1158. Found: 306.1165.

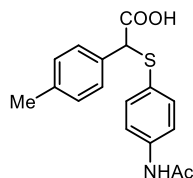

### 2-((4-acetamidophenyl)thio)-2-(p-tolyl)acetic acid (4c)

Following the general procedure A, the product was obtained as a yellowish solid, 31.3 mg, 50% yield. mp 208.9-220.4 °C. <sup>1</sup>H NMR (400 MHz, DMSO-*d*<sub>6</sub>) δ 12.94 (s, 1H), 9.98 (s, 1H), 7.51 – 7.45 (m, 2H), 7.32 – 7.25 (m, 4H), 7.12 (d, *J* = 7.9 Hz, 2H), 5.01 (s, 1H), 2.26 (s, 3H), 2.02 (s, 3H). <sup>13</sup>C NMR (101 MHz, DMSO-*d*<sub>6</sub>) δ 171.32, 168.37, 138.92, 137.23, 133.43, 132.57, 129.00, 128.26, 126.97, 119.29, 55.40, 24.01, 20.69. HRMS (ESI) Calcd. for [M+H]<sup>+</sup>: 316.1002. Found: 316.1009.

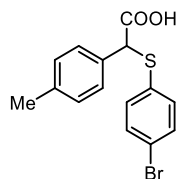

#### 2-((4-bromophenyl)thio)-2-(p-tolyl)acetic acid (4d)

Following the general procedure A, the product was obtained as a white solid, 41.5 mg, 62% yield. mp 118.5-122.4 °C.  $^1\text{H NMR}$  (300 MHz,  $\text{CDCl}_3$ )  $\delta$  8.10 (s, 1H), 7.45 – 7.35 (m, 2H), 7.33 – 7.27 (m, 2H), 7.25 – 7.18 (m, 2H), 7.17 – 7.12 (m, 2H), 4.83 (s, 1H), 2.34 (s, 3H).  $^{13}\text{C NMR}$  (75 MHz,  $\text{CDCl}_3$ )  $\delta$  176.00, 138.68, 134.09, 132.49, 132.14, 131.49, 129.55, 128.36, 122.50, 55.80, 21.17. **HRMS** (ESI) Calcd. for  $[\text{M}+\text{H}]^+$ : 336.9892. Found: 336.9890.

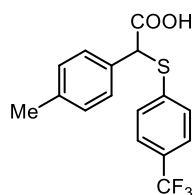

#### 2-(p-tolyl)-2-((4-(trifluoromethyl)phenyl)thio)acetic acid (4e)

Following the general procedure A, the product was obtained as a white solid, 43.1 mg, 66% yield. mp 109.1-119.8 °C.  $^1\text{H NMR}$  (300 MHz,  $\text{CDCl}_3$ )  $\delta$  9.11 (s, 1H), 7.54 – 7.46 (m, 2H), 7.45 – 7.39 (m, 2H), 7.38 – 7.33 (m, 2H), 7.21 – 7.12 (m, 2H), 4.97 (s, 1H), 2.35 (s, 3H).  $^{13}\text{C NMR}$  (75 MHz,  $\text{CDCl}_3$ )  $\delta$  176.05, 139.02 (d,  $J = 1.2$  Hz), 138.96, 131.10, 130.50, 129.69, 128.32, 125.84 (q,  $J = 3.8$  Hz), 54.74, 21.15.  $^{19}\text{F NMR}$  (282 MHz,  $\text{CDCl}_3$ )  $\delta$  -63.14. **HRMS** (ESI) Calcd. for  $[\text{M}+\text{NH}_4]^+$ : 344.0927. Found: 344.0931.

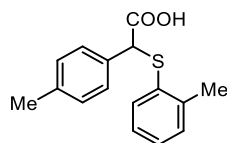

#### 2-(p-tolyl)-2-(o-tolylthio)acetic acid (4f)

Following the general procedure A, the product was obtained as a white solid, 38.7 mg, 71% yield. mp 91.3-93.9 °C.  $^1\text{H NMR}$  (400 MHz,  $\text{CDCl}_3$ )  $\delta$  9.51 (s, 1H), 7.37 – 7.34 (m, 3H), 7.21 – 7.13 (m, 4H), 7.10 (ddd,  $J = 8.7, 5.1, 2.5$  Hz, 1H), 4.80 (s, 1H), 2.39 (s, 3H), 2.35 (s, 3H).  $^{13}\text{C NMR}$  (101 MHz,  $\text{CDCl}_3$ )  $\delta$  176.62, 140.17, 138.44, 132.90, 132.59, 131.93, 130.42, 129.43, 128.35, 128.06, 126.60, 55.04, 21.15, 20.54. **HRMS** (ESI) Calcd. for  $[\text{M}+\text{H}]^+$ : 273.0944. Found: 273.0948.

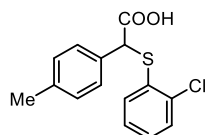

#### 2-((2-chlorophenyl)thio)-2-(p-tolyl)acetic acid (4g)

Following the general procedure A, the product was obtained as a white solid, 49.7 mg, 85% yield. mp 107.4-109.9 °C.  $^1\text{H NMR}$  (300 MHz,  $\text{CDCl}_3$ )  $\delta$  9.11 (s, 1H), 7.42-7.35 (m, 4H), 7.23 – 7.10 (m, 4H), 5.03 (s, 1H), 2.34 (s, 3H).  $^{13}\text{C NMR}$  (75 MHz,  $\text{CDCl}_3$ )  $\delta$  176.08, 138.65, 136.13, 132.88, 132.76, 131.21, 129.92, 129.53, 128.87, 128.38, 127.28, 53.87, 21.15. **HRMS** (ESI) Calcd. for  $[\text{M}+\text{H}]^+$ :

293.0398. Found: 293.0395.

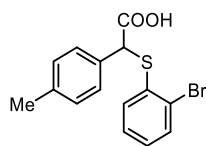

#### 2-((2-bromophenyl)thio)-2-(p-tolyl)acetic acid (4h)

Following the general procedure A, the product was obtained as a white solid, 55.1 mg, 82% yield. mp 91.9-93.8 °C.  $^1\text{H NMR}$  (400 MHz,  $\text{CDCl}_3$ )  $\delta$  7.86 (s, 1H), 7.58 (dd,  $J = 7.9, 1.4$  Hz, 1H), 7.41 – 7.36 (m, 2H), 7.35 (dd,  $J = 7.8, 1.7$  Hz, 1H), 7.21 – 7.13 (m, 3H), 7.09 (td,  $J = 7.7, 1.7$  Hz, 1H), 5.02 (s, 1H), 2.34 (s, 3H).  $^{13}\text{C NMR}$  (101 MHz,  $\text{CDCl}_3$ )  $\delta$  175.89, 138.70, 134.92, 133.26, 132.50, 131.11, 129.56, 128.86, 128.42, 127.94, 126.47, 54.22, 21.16. **HRMS** (ESI) Calcd. for  $[\text{M}+\text{H}]^+$ : 336.9892. Found: 336.9895.

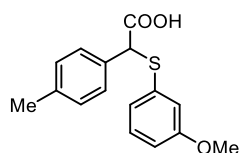

#### 2-((3-methoxyphenyl)thio)-2-(p-tolyl)acetic acid (4i)

Following the general procedure A, the product was obtained as a white solid, 44.3 mg, 77% yield. mp 96.1-99.4 °C.  $^1\text{H NMR}$  (400 MHz,  $\text{CDCl}_3$ )  $\delta$  9.56 (s, 1H), 7.35 (d,  $J = 7.9$  Hz, 2H), 7.21 – 7.12 (m, 3H), 6.98 (dt,  $J = 7.8, 1.2$  Hz, 1H), 6.90 (t,  $J = 2.0$  Hz, 1H), 6.80 (ddd,  $J = 8.3, 2.5, 1.0$  Hz, 1H), 4.89 (s, 1H), 3.72 (s, 3H), 2.34 (s, 3H).  $^{13}\text{C NMR}$  (101 MHz,  $\text{CDCl}_3$ )  $\delta$  176.53, 159.67, 138.48, 134.80, 131.88, 129.83, 129.47, 128.37, 124.15, 116.87, 114.19, 55.69, 55.19, 21.12. **HRMS** (ESI) Calcd. for  $[\text{M}+\text{H}]^+$ : 289.0893. Found: 289.0897.

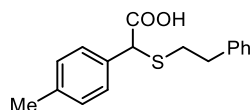

#### 2-(phenethylthio)-2-(p-tolyl)acetic acid (4j)

Following the general procedure A, the product was obtained as a yellowish oil, 23.1 mg, 40% yield.  $^1\text{H NMR}$  (400 MHz,  $\text{CDCl}_3$ )  $\delta$  8.00 (s, 1H), 7.24 (d,  $J = 8.0$  Hz, 2H), 7.22 – 7.16 (m, 2H), 7.15 – 7.10 (m, 1H), 7.09 – 7.04 (m, 4H), 4.43 (s, 1H), 2.81 – 2.64 (m, 4H), 2.26 (s, 3H).  $^{13}\text{C NMR}$  (101 MHz,  $\text{CDCl}_3$ )  $\delta$  176.72, 139.95, 138.29, 132.18, 129.42, 128.50, 128.48, 128.39, 126.44, 51.70, 35.68, 33.45, 21.13. **HRMS** (ESI) Calcd. for  $[\text{M}+\text{H}]^+$ : 287.1100. Found: 287.1107.

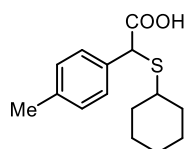

#### 2-(cyclohexylthio)-2-(p-tolyl)acetic acid (4k)

Following the general procedure A, the product was obtained as a white solid, 22.8 mg, 43% yield. mp 62.9-64.6 °C.  $^1\text{H NMR}$  (400 MHz,  $\text{CDCl}_3$ )  $\delta$  7.38 – 7.31 (m, 2H), 7.15 (d,  $J = 8.0$  Hz, 2H), 4.61 (s, 1H), 2.74 (tt,  $J = 10.4, 3.7$  Hz, 1H), 2.33 (s, 3H), 2.00 – 1.91 (m, 2H), 1.79 – 1.68 (m, 2H), 1.63 – 1.54

(m, 1H), 1.40 – 1.19 (m, 5H).  $^{13}\text{C}$  NMR (101 MHz,  $\text{CDCl}_3$ )  $\delta$  177.21, 138.10, 132.86, 129.38, 128.29, 50.17, 44.25, 33.19, 33.09, 25.79, 25.76, 25.68, 21.12. HRMS (ESI) Calcd. for  $[\text{M}+\text{H}]^+$ : 265.1257. Found: 265.1262.

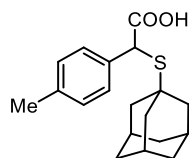

#### 2-((adamantan-1-ylthio)-2-(p-tolyl)acetic acid (4l)

Following the general procedure A, the product was obtained as a white solid, 21.6 mg, 34% yield. mp 173.3-175.6 °C.  $^1\text{H}$  NMR (400 MHz,  $\text{CDCl}_3$ )  $\delta$  10.80 (s, 1H), 7.37 – 7.31 (m, 2H), 7.13 (d,  $J$  = 7.9 Hz, 2H), 4.62 (s, 1H), 2.32 (s, 3H), 2.04 (q,  $J$  = 3.2 Hz, 3H), 1.93 – 1.85 (m, 6H), 1.73 – 1.60 (m, 6H).  $^{13}\text{C}$  NMR (101 MHz,  $\text{CDCl}_3$ )  $\delta$  178.34, 137.78, 134.01, 129.36, 128.14, 47.28, 46.77, 43.28, 36.05, 29.66, 21.07. HRMS (ESI) Calcd. for  $[\text{M}+\text{H}]^+$ : 317.1570. Found: 317.1576.

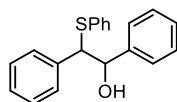

#### 1,2-diphenyl-2-(phenylthio)ethan-1-ol (6a)

Following the general procedure B, the product was obtained as a colorless oil, 47.0 mg, 78% yield; *syn: anti* = 44: 56;  $^1\text{H}$  NMR of (*syn*)- and (*anti*)-6a (300 MHz,  $\text{CDCl}_3$ )  $\delta$  7.23 – 7.01 (m, 26H), 6.97 – 6.89 (m, 2H), 4.95 (d,  $J$  = 5.8 Hz, 1H, *anti*), 4.85 (d,  $J$  = 8.6 Hz, 1H, *syn*), 4.36 (d,  $J$  = 5.8 Hz, 1H, *anti*), 4.27 (d,  $J$  = 8.6 Hz, 1H, *syn*), 3.24 (s, 1H, *syn*), 2.52 (s, 1H, *anti*).  $^{13}\text{C}$  NMR of (*syn*)- and (*anti*)-6a (75 MHz,  $\text{CDCl}_3$ )  $\delta$  140.47, 140.31, 139.13, 137.50, 134.27, 134.06, 132.32, 132.21, 129.09, 128.83, 128.50, 128.15, 128.07, 127.96, 127.93, 127.80, 127.73, 127.60, 127.38, 127.30, 127.21, 126.83, 126.62, 76.80, 75.77, 63.87, 61.34. HRMS (ESI) Calcd. for  $[\text{M}+\text{H}]^+$ : 307.1151. Found: 307.1161.

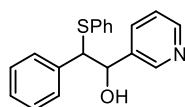

#### 2-phenyl-2-(phenylthio)-1-(pyridin-3-yl)ethan-1-ol (6b)

Following the general procedure B, the product was obtained as a sticky oil, 46.7 mg, 76% yield; *syn: anti* = 44: 56;  $^1\text{H}$  NMR of (*syn*)- and (*anti*)-6b (300 MHz,  $\text{CDCl}_3$ )  $\delta$  8.23 – 8.10 (m, 4H), 7.41 (dt,  $J$  = 7.9, 2.0 Hz, 1H), 7.33 (dt,  $J$  = 7.9, 2.0 Hz, 1H), 7.21 – 7.12 (m, 9H), 7.12 – 7.02 (m, 8H), 7.02 – 6.89 (m, 4H), 4.96 (d,  $J$  = 5.8 Hz, 1H), 4.87 (d,  $J$  = 8.0 Hz, 1H), 4.29 (d,  $J$  = 5.8 Hz, 2H), 4.25 (d,  $J$  = 8.0 Hz, 1H).  $^{13}\text{C}$  NMR of (*syn*)- and (*anti*)-6b (75 MHz,  $\text{CDCl}_3$ )  $\delta$  148.38, 148.32, 148.06, 147.90, 138.47, 137.23, 136.84, 136.71, 134.72, 134.61, 134.06, 133.82, 132.23, 132.09, 129.05, 128.88, 128.82, 128.50, 128.21, 127.70, 127.50, 127.38, 127.35, 122.95, 122.90, 74.46, 73.52, 63.14, 61.14. HRMS (EI) Calcd. for  $\text{C}_{19}\text{H}_{17}\text{NOS}$   $[\text{M}]^+$ : 307.1019. Found: 307.1018.

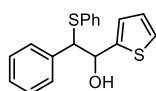

#### 2-phenyl-2-(phenylthio)-1-(thiophen-2-yl)ethan-1-ol (6c)

Following the general procedure B, the product was obtained as a sticky oil, 38 mg, 61% yield; *syn: anti*

= 53:47. **<sup>1</sup>H NMR** (400 MHz, CDCl<sub>3</sub>) δ 7.37 – 7.26 (m, 10H), 7.26 – 7.22 (m, 5H), 7.22 – 7.17 (m, 6H), 7.16 (dd, *J* = 5.1, 1.2 Hz, 1H), 7.13 – 7.06 (m, 2H), 6.95 – 6.86 (m, 2H), 6.78 (dd, *J* = 5.1, 3.6 Hz, 1H), 6.63 (dt, *J* = 3.6, 0.9 Hz, 1H), 5.33 (d, *J* = 6.1 Hz, 1H), 5.25 (d, *J* = 8.5 Hz, 1H), 4.50 (d, *J* = 6.1 Hz, 1H), 4.38 (d, *J* = 8.5 Hz, 1H), 3.50 (s, 1H), 2.76 (s, 1H). **<sup>13</sup>C NMR** (101 MHz, CDCl<sub>3</sub>) δ 144.15, 143.85, 139.00, 137.66, 134.07, 133.45, 132.83, 132.35, 129.02, 128.86, 128.41, 128.32, 128.16, 127.77, 127.67, 127.42, 126.24, 126.21, 125.32, 125.26, 125.03, 124.78, 72.82, 72.38, 63.73, 61.74. **HRMS** (ESI) Calcd. for [M+H]<sup>+</sup>: 313.0715. Found: 313.0710.

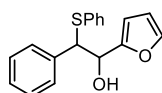

### 1-(furan-2-yl)-2-phenyl-2-(phenylthio)ethan-1-ol (6d)

Following the general procedure B, the product was obtained as a sticky oil, 41.6 mg, 70% yield; *syn:anti* = 48:52; **<sup>1</sup>H NMR** (400 MHz, CDCl<sub>3</sub>) δ 7.29 – 7.19 (m, 11H), 7.19 – 7.11 (m, 9H), 7.11 – 7.05 (m, 2H), 6.23 (dd, *J* = 3.3, 1.8 Hz, 1H), 6.16 – 6.11 (m, 2H), 6.07 – 6.04 (m, 1H), 5.03 (dd, *J* = 6.7, 2.2 Hz, 1H), 4.95 (dd, *J* = 8.2, 1.8 Hz, 1H), 4.61 (d, *J* = 6.7 Hz, 1H), 4.58 (d, *J* = 8.2 Hz, 1H), 3.21 (d, *J* = 3.8 Hz, 1H), 2.48 (d, *J* = 4.7 Hz, 1H). **<sup>13</sup>C NMR** (101 MHz, CDCl<sub>3</sub>) δ 153.09, 152.56, 141.91, 138.94, 137.90, 134.04, 133.39, 132.80, 132.34, 128.81, 128.78, 128.66, 128.37, 128.14, 128.12, 127.70, 127.58, 127.37, 127.33, 110.23, 110.10, 108.23, 108.16, 77.32, 77.00, 76.68, 70.36, 70.24, 60.35, 58.71. **HRMS** (ESI) Calcd. for [M+H]<sup>+</sup>: 297.0944. Found: 297.0937.

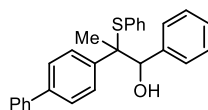

### 2-([1,1'-biphenyl]-4-yl)-1-phenyl-2-(phenylthio)propan-1-ol (6e)

Following the general procedure B, the product was obtained as a colorless oil, 41.4 mg, 52% yield; *syn:anti* = 46:54. **<sup>1</sup>H NMR** (400 MHz, CDCl<sub>3</sub>) δ 7.57 – 7.49 (m, 5H), 7.44 (s, 5H), 7.39 – 7.29 (m, 9H), 7.29 – 7.21 (m, 6H), 7.20 – 7.14 (m, 3H), 7.14 – 7.04 (m, 8H), 7.04 – 6.95 (m, 4H), 6.88 (ddt, *J* = 13.9, 7.0, 1.5 Hz, 4H), 5.19 (s, 1H), 4.78 (s, 1H), 3.23 (s, 1H), 3.14 (s, 1H), 1.47 (s, 3H), 1.43 (s, 3H). **<sup>13</sup>C NMR** (101 MHz, CDCl<sub>3</sub>) δ 141.51, 140.41, 140.28, 139.83, 139.49, 139.36, 138.54, 138.50, 136.89, 136.29, 131.30, 130.90, 129.06, 128.94, 128.80, 128.75, 128.68, 128.63, 128.53, 128.34, 127.83, 127.73, 127.35, 127.33, 127.31, 127.19, 126.94, 126.83, 126.19, 126.08, 79.54, 78.66, 62.60, 60.30, 22.89, 18.78. **HRMS** (ESI) Calcd. for [M+Na]<sup>+</sup>: 419.1440. Found: 419.1441.

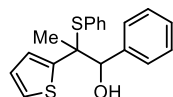

### phenyl-2-(phenylthio)-2-(thiophen-2-yl)propan-1-ol (6f)

Following the general procedure B, the product was obtained as a colorless oil, 48.9 mg, 75% yield; *syn:anti* = 46:54. **<sup>1</sup>H NMR** (400 MHz, CDCl<sub>3</sub>) δ 7.53 – 7.47 (m, 2H), 7.45 – 7.38 (m, 1H), 7.37 – 7.29 (m, 7H), 7.27 – 7.14 (m, 9H), 7.14 – 7.08 (m, 2H), 7.03 – 6.97 (m, 2H), 6.94 (dd, *J* = 5.1, 3.6 Hz, 1H), 6.87 (dd, *J* = 3.7, 1.2 Hz, 1H), 6.80 (dd, *J* = 5.1, 3.6 Hz, 1H), 6.49 (dd, *J* = 3.6, 1.2 Hz, 1H), 5.15 (s, 1H), 4.77 (s, 1H), 3.73 – 3.23 (m, 2H), 1.56 (s, 3H), 1.53 (s, 4H). **<sup>13</sup>C NMR** (101 MHz, CDCl<sub>3</sub>) δ 148.27, 144.28, 138.41, 138.05, 136.93, 136.48, 130.83, 130.59, 129.41, 129.11, 128.77, 128.58, 128.04, 127.93, 127.67, 127.55, 127.41, 127.28, 126.80, 126.15, 126.10, 125.96, 125.63, 124.68, 79.16, 78.97, 60.84, 59.18, 24.67, 20.61. **HRMS** (ESI) Calcd. for [M+Na]<sup>+</sup>: 349.0691. Found: 349.0697.



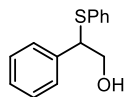

### 2-phenyl-2-(phenylthio)ethan-1-ol (6g)

Following the modified general procedure B, paraformaldehyde (4.0 eq., 0.8 mmol) and DMSO (4 mL) were used, the product was obtained as a colorless oil, 22.1 mg, 48% yield.  $^1\text{H NMR}$  (400 MHz,  $\text{CDCl}_3$ )  $\delta$  7.29 – 7.21 (m, 6H), 7.21 – 7.14 (m, 4H), 4.24 (t,  $J = 6.9$  Hz, 1H), 3.89 – 3.79 (m, 2H), 1.79 (s, 1H).  $^{13}\text{C NMR}$  (100 MHz,  $\text{CDCl}_3$ )  $\delta$  138.88, 133.68, 132.55, 128.92, 128.71, 128.05, 127.79, 127.56, 65.24, 56.07. **HRMS** (ESI) Calcd. for  $[\text{M}+\text{H}]^+$ : 231.0838. Found: 231.0840.

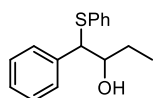

### 1-phenyl-1-(phenylthio)butan-2-ol (6h)

Following the general procedure B, the product was obtained as a colorless oil, 21.3 mg, 41% yield; *syn:anti* = 53:47;  $^1\text{H NMR}$  of (*syn*)- and (*anti*)-**6c** (400 MHz,  $\text{CDCl}_3$ )  $\delta$  7.41 – 7.36 (m, 2H), 7.36 – 7.30 (m, 3H), 7.30 – 7.23 (m, 8H), 7.23 – 7.15 (m, 8H), 4.25 (d,  $J = 5.0$  Hz, 1H, *anti*), 4.08 (d,  $J = 8.3$  Hz, 1H, *syn*), 3.83 – 3.88 (m, 2H), 1.63 – 1.49 (m, 2H, *anti*), 1.45 – 1.28 (m, 3H, *syn*), 0.95 (td,  $J = 7.4, 5.9$  Hz, 7H, mix).  $^{13}\text{C NMR}$  of (*syn*)- and (*anti*)-**6c** (101 MHz,  $\text{CDCl}_3$ )  $\delta$  140.05, 138.29, 134.46, 133.99, 132.66, 132.09, 128.99, 128.91, 128.81, 128.43, 128.20, 127.58, 127.45, 127.36, 127.28, 74.77, 74.47, 62.21, 59.89, 27.12, 27.05, 10.28, 9.97. **HRMS** (ESI) Calcd. for  $[\text{M}+\text{H}]^+$ : 259.1151. Found: 259.1153.

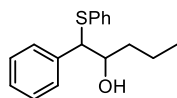

### phenyl-1-(phenylthio)pentan-2-ol (6i)

Following the modified general procedure B, the product was obtained as a colorless oil, 23.4 mg, 43% yield; *syn:anti* = 55:45;  $^1\text{H NMR}$  of (*syn*)- and (*anti*)-**6d** (400 MHz,  $\text{CDCl}_3$ )  $\delta$  7.34 – 7.07 (m, 22H), 4.16 (d,  $J = 4.9$  Hz, 1H, *anti*), 4.00 (d,  $J = 8.1$  Hz, 1H, *syn*), 3.84 (td,  $J = 7.8, 3.1$  Hz, 2H), 2.03 (d,  $J = 49.7$  Hz, 2H), 1.51 – 1.20 (m, 9H), 0.77 (dt,  $J = 12.9, 6.5$  Hz, 7H).  $^1\text{H NMR}$  of (*syn*)- and (*anti*)-**6c** (101 MHz,  $\text{CDCl}_3$ )  $\delta$  140.03, 138.29, 134.48, 134.05, 132.60, 132.05, 129.00, 128.90, 128.81, 128.44, 128.42, 128.22, 127.56, 127.41, 127.35, 127.26, 73.31, 72.85, 62.53, 60.23, 36.28, 36.26, 19.16, 18.96, 13.93, 13.90. **HRMS** (ESI) Calcd. for  $[\text{M}+\text{H}]^+$ : 273.1308. Found: 273.1310.

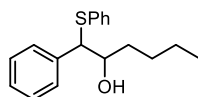

### phenyl-1-(phenylthio)hexan-2-ol (6j)

Following the general procedure B, the product was obtained as a colorless oil, 24.4 mg, 43% yield; *syn:anti* = 54:46;  $^1\text{H NMR}$  of (*syn*)- and (*anti*)-**6e** (400 MHz,  $\text{CDCl}_3$ )  $\delta$  7.33 – 7.28 (m, 2H, mix, 7.28 – 7.22 (m, 3H), 7.21 – 7.14 (m, 9H), 7.14 – 7.06 (m, 7H), 4.16 (d,  $J = 5.0$  Hz, 1H, *anti*), 4.00 (d,  $J = 8.1$  Hz, 1H, *syn*), 3.83 (dt,  $J = 7.6, 4.0, 2.2$  Hz, 2H), 2.62 (s, 1H, *anti*), 2.00 (s, 1H, *syn*), 1.53 – 1.05 (m, 16H), 0.76 (dt,  $J = 11.5, 7.1$  Hz, 7H).  $^{13}\text{C NMR}$  of (*syn*)- and (*anti*)-**6e** (101 MHz,  $\text{CDCl}_3$ )  $\delta$  140.05, 138.29, 134.49, 134.04, 132.61, 132.05, 128.99, 128.90, 128.80, 128.43, 128.21, 127.56, 127.41, 127.35, 127.26,

73.52, 73.11, 62.49, 60.19, 33.87, 33.83, 28.10, 27.89, 22.57, 22.51, 13.98, 13.95. **HRMS** (ESI) Calcd. for  $[M+H]^+$ : 287.1464. Found: 287.1467.

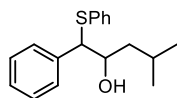

#### 4-methyl-1-phenyl-1-(phenylthio)pentan-2-ol (6k)

Following the general procedure B, the product was obtained as a colorless oil, 20.6 mg, 36% yield; *syn:anti* = 52:48;  **$^1\text{H}$  NMR** of (*syn*)- and (*anti*)-**6f** (400 MHz,  $\text{CDCl}_3$ )  $\delta$  7.33 – 7.28 (m, 2H), 7.27 – 7.22 (m, 3H), 7.21 – 7.17 (m, 7H), 7.16 – 7.06 (m, 9H), 4.14 (d,  $J = 4.8$  Hz, 1H, *anti*), 3.98 (d,  $J = 8.0$  Hz, 1H, *syn*), 3.96 – 3.87 (m, 2H), 2.03 (s, 2H), 1.81 – 1.67 (m, 2H), 1.33 – 1.01 (m, 6H), 0.77 (dt,  $J = 10.8, 6.6$  Hz, 13H).  **$^{13}\text{C}$  NMR** of (*syn*)- and (*anti*)-**6f** (101 MHz,  $\text{CDCl}_3$ )  $\delta$  140.01, 138.26, 134.53, 134.11, 132.59, 131.97, 129.03, 128.89, 128.82, 128.45, 128.42, 128.23, 127.56, 127.41, 127.35, 127.23, 71.71, 71.19, 62.95, 60.61, 43.33, 43.26, 24.81, 24.78, 23.68, 23.47, 21.76, 21.36. **HRMS** (ESI) Calcd. for  $[M+H]^+$ : 287.1464. Found: 287.1466.

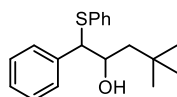

#### 4,4-dimethyl-1-phenyl-1-(phenylthio)pentan-2-ol (6l)

Following the general procedure B, the product was obtained as a colorless oil, 22.1 mg, 37% yield; *syn:anti* = 64:36;  **$^1\text{H}$  NMR** of (*syn*)- and (*anti*)-**6g** (400 MHz,  $\text{CDCl}_3$ )  $\delta$  7.49 – 7.43 (m, 2H), 7.37 (ddd,  $J = 6.8, 3.9, 1.9$  Hz, 3H), 7.35 – 7.20 (m, 14H), 4.24 (d,  $J = 5.0$  Hz, 1H, *syn*), 4.11 (tt,  $J = 4.3, 2.4$  Hz, 3H), 2.12 (s, 2H, mix), 1.60 (dd,  $J = 14.6, 1.6$  Hz, 1H), 1.46 – 1.37 (m, 2H), 0.94 (s, 9H), 0.93 (s, 9H).  **$^{13}\text{C}$  NMR** of (*syn*)- and (*anti*)-**6g** (101 MHz,  $\text{CDCl}_3$ )  $\delta$  140.07, 138.35, 134.64, 134.26, 132.45, 131.74, 129.06, 128.89, 128.81, 128.42, 128.36, 127.53, 127.35, 127.33, 127.14, 77.32, 77.00, 76.68, 71.42, 70.85, 63.55, 61.70, 47.72, 47.52, 30.34, 29.98, 29.95. **HRMS** (ESI) Calcd. for  $[M+H]^+$ : 301.1621. Found: 301.1624.

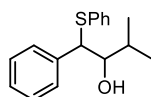

#### 3-methyl-1-phenyl-1-(phenylthio)butan-2-ol (6m)

Following the general procedure B, the product was obtained as a colorless oil, 17.8 mg, 33% yield; *syn:anti* = 51:49;  **$^1\text{H}$  NMR** of (*syn*)- and (*anti*)-**6h** (300 MHz,  $\text{CDCl}_3$ )  $\delta$  7.43 – 7.37 (m, 2H), 7.37 – 7.28 (m, 4H), 7.28 – 7.19 (m, 14H), 7.18 – 7.10 (m, 3H), 4.32 (d,  $J = 5.5$  Hz, 1H, *anti*), 4.16 (d,  $J = 8.8$  Hz, 1H, *syn*), 3.76 (dd,  $J = 8.7, 3.5$  Hz, 1H), 3.61 (dd,  $J = 6.7, 5.5$  Hz, 1H), 1.89 – 1.72 (m,  $J = 6.7$  Hz, 1H), 1.62 (pd,  $J = 6.8, 3.5$  Hz, 1H), 1.02 – 0.84 (m, 14H).  **$^{13}\text{C}$  NMR** of (*syn*)- and (*anti*)-**6h** (75 MHz,  $\text{CDCl}_3$ )  $\delta$  140.26, 138.38, 134.12, 133.81, 132.92, 132.49, 129.14, 128.91, 128.77, 128.46, 128.42, 128.06, 127.57, 127.50, 127.45, 127.29, 60.70, 57.65, 30.51, 29.76, 20.56, 19.53, 17.52, 14.82. **HRMS** (ESI) Calcd. for  $[M+H]^+$ : 273.1308. Found: 273.1309.

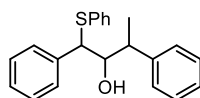

### 1,3-diphenyl-1-(phenylthio)butan-2-ol (6n)

Following the general procedure B, the product was obtained as a colorless oil, 19.2 mg, 29% yield; *syn:anti* = 53:47;  $^1\text{H NMR}$  of (*syn*)- and (*anti*)-**6i** (400 MHz,  $\text{CDCl}_3$ )  $\delta$  7.24 – 7.05 (m, 26H), 6.94 – 6.89 (m, 2H), 4.08 – 4.00 (m, 2H), 3.99 – 3.93 (m, 2H), 2.91 – 2.80 (m, 1H, *syn*), 2.72 – 2.63 (m, 1H, *anti*), 2.47 (s, 1H), 2.34 (s, 1H), 1.24 (d,  $J = 7.0$  Hz, 3H), 1.20 (d,  $J = 6.9$  Hz, 3H).  $^{13}\text{C NMR}$  of (*syn*)- and (*anti*)-**6i** (101 MHz,  $\text{CDCl}_3$ )  $\delta$  144.69, 144.10, 140.66, 137.33, 134.08, 134.01, 132.52, 132.09, 129.56, 128.93, 128.71, 128.58, 128.50, 128.44, 128.23, 128.02, 127.80, 127.71, 127.68, 127.37, 127.23, 126.58, 126.49, 78.81, 76.11, 59.53, 56.42, 42.91, 42.22, 18.48, 14.94. **HRMS** (ESI) Calcd. for  $[\text{M}+\text{H}]^+$ : 335.1464. Found: 335.1463.

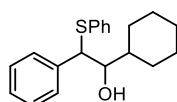

### cyclohexyl-2-phenyl-2-(phenylthio)ethan-1-ol (6o)

Following the general procedure B, the product was obtained as a colorless oil, 16.5 mg, 26% yield; *syn:anti* = 54:46;  $^1\text{H NMR}$  of (*syn*)- and (*anti*)-**6i** (300 MHz,  $\text{CDCl}_3$ )  $\delta$  7.42 – 7.37 (m, 2H), 7.36 – 7.29 (m, 4H), 7.27 (d,  $J = 2.2$  Hz, 2H), 7.26 – 7.15 (m, 14H), 4.36 (d,  $J = 5.4$  Hz, 1H, *anti*), 4.26 (d,  $J = 8.0$  Hz, 1H, *syn*), 3.72 – 3.63 (m, 2H), 2.65 (s, 1H), 2.17 (s, 1H), 1.96 – 1.51 (m, 14H), 1.50 – 1.29 (m, 4H), 1.23 – 0.92 (m, 11H).  $^{13}\text{C NMR}$  of (*syn*)- and (*anti*)-**6i** (75 MHz,  $\text{CDCl}_3$ )  $\delta$  140.40, 138.40, 134.28, 134.14, 132.50, 132.34, 129.13, 128.90, 128.75, 128.48, 128.43, 128.09, 127.53, 127.37, 127.29, 127.27, 77.75, 76.85, 39.94, 39.73, 30.56, 29.66, 27.74, 26.35, 26.31, 25.98, 25.91, 25.82, 25.76. **HRMS** (ESI) Calcd. for  $[\text{M}+\text{H}]^+$ : 313.1621. Found: 313.1624.

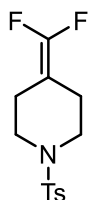

### 4-(difluoromethylene)-1-tosylpiperidine (9a)

Following the general procedure C, the product was obtained as a white solid, 42 mg, 73% yield.  $^1\text{H NMR}$  (400 MHz,  $\text{CDCl}_3$ )  $\delta$  7.65 – 7.59 (m, 2H), 7.31 (d,  $J = 8.0$  Hz, 2H), 3.02 (t,  $J = 5.7$  Hz, 4H), 2.42 (s, 3H), 2.30 – 2.23 (m, 4H).  $^{13}\text{C NMR}$  (101 MHz,  $\text{CDCl}_3$ )  $\delta$  151.23 (t,  $J = 283.0$  Hz), 143.67, 133.14, 129.67, 127.56, 83.64 (t,  $J = 20.7$  Hz), 46.20 (t,  $J = 2.1$  Hz), 23.62 (t,  $J = 1.9$  Hz), 21.47.  $^{19}\text{F NMR}$  (377 MHz,  $\text{CDCl}_3$ )  $\delta$  -96.51. **HRMS** (ESI) Calcd. for  $\text{C}_{13}\text{H}_{16}\text{F}_2\text{NO}_2\text{S}$   $[\text{M}+\text{H}]^+$ : 288.0864, found: 288.0866.

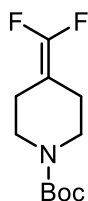

### tert-butyl 4-(difluoromethylene)piperidine-1-carboxylate (9b)

Following the general procedure C, the product was obtained as a colorless oil, 23.7 mg, 51% yield.; **<sup>1</sup>H NMR** (400 MHz, CDCl<sub>3</sub>) δ 3.44 – 3.35 (m, 4H), 2.16 – 2.12 (m, 4H), 1.46 (s, 9H). **<sup>13</sup>C NMR** (101 MHz, CDCl<sub>3</sub>) δ 154.60 , 151.41 (t, *J* = 281.9 Hz), 84.97 (t, *J* = 20.2 Hz), 79.76 , 43.83 , 28.39 , 23.95 . **<sup>19</sup>F NMR** (376 MHz, CDCl<sub>3</sub>) δ -97.37. **HRMS** (ESI) calcd for C<sub>11</sub>H<sub>18</sub>F<sub>2</sub>NO<sub>2</sub> [M+H]<sup>+</sup>: 234.1300, found: 234.1299.

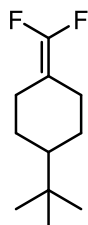

### 1-(tert-butyl)-4-(difluoromethylene)cyclohexane (9c)

Following the general procedure C, the product was obtained as a colorless oil, 14.8 mg, 39% yield. **<sup>1</sup>H NMR** (400 MHz, CDCl<sub>3</sub>) δ 2.54 – 2.45 (m, 2H), 1.88 – 1.80 (m, 2H), 1.77 – 1.64 (m, 2H), 1.10 – 0.94 (m, 3H), 0.85 (s, 9H). **<sup>13</sup>C NMR** (101 MHz, CDCl<sub>3</sub>) δ 150.42 (t, *J* = 280.0 Hz), 88.00 (t, *J* = 18.6 Hz), 47.81 , 32.47 , 27.51 , 27.22 (t, *J* = 1.9 Hz), 24.61 (t, *J* = 1.9 Hz). **<sup>19</sup>F NMR** (376 MHz, CDCl<sub>3</sub>) δ -99.99. **HRMS** (EI) calcd for C<sub>13</sub>H<sub>22</sub>F<sub>2</sub> [M]<sup>+</sup>: 188.1377, found: 188.1367.

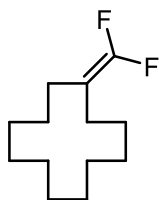

### (difluoromethylene)cyclododecane (9d)

Following the general procedure C, the product was obtained as a colorless oil, 17.1 mg, 40% yield. **<sup>1</sup>H NMR** (300 MHz, CDCl<sub>3</sub>) δ 2.02 (tt, *J* = 7.0, 2.4 Hz, 4H), 1.48 (p, *J* = 6.7, 6.3 Hz, 4H), 1.38 – 1.31 (m, 14H). **<sup>13</sup>C NMR** (75 MHz, CDCl<sub>3</sub>) δ 153.64, (t, *J* = 281.25 Hz), 87.05 (t, *J* = 16.0 Hz), 25.12 (t, *J* = 1.5 Hz), 24.34 , 24.17 (t, *J* = 1.5Hz), 23.38 , 23.05 . **<sup>19</sup>F NMR** (282 MHz, CDCl<sub>3</sub>) δ -94.71. **HRMS** (EI) calcd for C<sub>13</sub>H<sub>22</sub>F<sub>2</sub> [M]<sup>+</sup>: 216.1684, found: 216.1688.

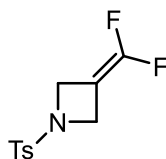

### 3-(difluoromethylene)-1-tosylazetidone (9e)

Following the general procedure C, the product was obtained as a white solid, 19.8 mg, 38% yield. **<sup>1</sup>H NMR** (300 MHz, CDCl<sub>3</sub>) δ 7.80 – 7.70 (m, 2H), 7.43 – 7.34 (m, 2H), 4.38 (t, *J* = 3.8 Hz, 4H), 2.46 (s, 3H). **<sup>13</sup>C NMR** (75 MHz, CDCl<sub>3</sub>) δ 150.19 (t, *J* = 284.6 Hz), 144.69 , 131.34 , 130.04 , 128.41 , 78.24 (t, *J* = 30.1 Hz), 53.06 (t, *J* = 2.8 Hz), 21.66. **<sup>19</sup>F NMR** (282 MHz, CDCl<sub>3</sub>) δ -91.60. **HRMS** (ESI) calcd for [M+H]<sup>+</sup>: 260.0551, found: 260.0558.

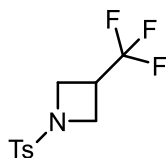

#### **tosyl-3-(trifluoromethyl)azetidine (9e')**

Following the general procedure C, the product was obtained as a white solid (by product), 14.8 mg, 21% yield.  $^1\text{H NMR}$  (400 MHz,  $\text{CDCl}_3$ )  $\delta$  7.75 – 7.70 (m, 2H), 7.39 (d,  $J = 8.0$  Hz, 2H), 3.97 (t,  $J = 8.8$  Hz, 2H), 3.81 (dd,  $J = 8.8, 6.4$  Hz, 2H), 3.10 (ht,  $J = 8.5, 6.4$  Hz, 1H), 2.46 (s, 3H).  $^{13}\text{C NMR}$  (101 MHz,  $\text{CDCl}_3$ )  $\delta$  144.60, 131.04, 129.92, 128.27, 125.26 (q,  $J = 275.5$  Hz), 49.61 (q,  $J = 3.8$  Hz), 31.10 (q,  $J = 32.9$  Hz), 21.59.  $^{19}\text{F NMR}$  (376 MHz,  $\text{CDCl}_3$ )  $\delta$  -73.79. **HRMS** (ESI) calcd for  $[\text{M}+\text{H}]^+$ : 280.0614, found: 280.0617.

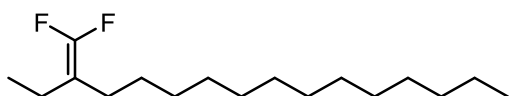

#### **3-(difluoromethylene)hexadecane (9f)**

Following the general procedure C, the product was obtained as a colorless oil, 33.9 mg, 62% yield.  $^1\text{H NMR}$  (300 MHz,  $\text{CDCl}_3$ )  $\delta$  2.03 – 1.92 (m, 4H), 1.43 – 1.33 (m, 2H), 1.26 (s, 20H), 0.99 (t,  $J = 7.5$  Hz, 3H), 0.92 – 0.84 (m, 3H).  $^{13}\text{C NMR}$  (75 MHz,  $\text{CDCl}_3$ )  $\delta$  152.95 (t,  $J = 282.5$  Hz), 90.33 (t,  $J = 16.4$  Hz), 31.95, 29.71, 29.68, 29.62, 29.44, 29.39, 29.20, 27.45 (t,  $J = 2.6$  Hz), 26.01 – 25.19 (m), 22.71, 19.28 (t,  $J = 2.0$  Hz), 14.12, 12.43 (t,  $J = 2.7$  Hz).  $^{19}\text{F NMR}$  (282 MHz,  $\text{CDCl}_3$ )  $\delta$  -97.45 (d,  $J = 59.2$  Hz, 1F),  $\delta$  -97.69 (d,  $J = 59.2$  Hz, 1F), **HRMS** (EI) calcd for  $\text{C}_{17}\text{H}_{32}\text{F}_2$   $[\text{M}]^+$ : 274.2467, found: 274.2461.

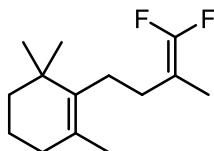

#### **2-(4,4-difluoro-3-methylbut-3-en-1-yl)-1,3,3-trimethylcyclohex-1-ene (9g)**

Following the general procedure C, the product was obtained as a colorless oil, 20.0 mg, 44% yield.  $^1\text{H NMR}$  (400 MHz,  $\text{CDCl}_3$ )  $\delta$  2.09 – 2.03 (m, 2H), 2.03 – 1.95 (m, 2H), 1.95 – 1.88 (m, 2H), 1.61 (q,  $J = 3.4$  Hz, 6H), 1.59 – 1.54 (m, 2H), 1.45 – 1.39 (m, 2H), 1.00 (s, 6H).  $^{13}\text{C NMR}$  (101 MHz,  $\text{CDCl}_3$ )  $\delta$  152.72 (dd,  $J = 282.8, 280.7$  Hz), 136.31, 127.72, 85.25 (dd,  $J = 20.4, 16.9$  Hz), 39.78, 34.94, 32.75, 28.99 (d,  $J = 2.1$  Hz), 28.52, 26.76 (dd,  $J = 2.6, 2.3$  Hz), 22.35, 19.65, 19.50, 14.06, 11.92 (t,  $J = 2.1$  Hz).  $^{19}\text{F NMR}$  (377 MHz,  $\text{CDCl}_3$ )  $\delta$  -97.41 (d,  $J = 59.5$  Hz, 1F), -98.25 (d,  $J = 59.3$  Hz, 1F). **HRMS** (EI) calcd for  $\text{C}_{14}\text{H}_{22}\text{F}_2$   $[\text{M}]^+$ : 228.1684, found: 228.1683.

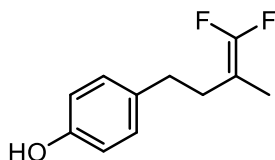

#### **4-(4,4-difluoro-3-methylbut-3-en-1-yl)phenol (9h)**

Following the general procedure C, the product was obtained as a colorless oil, 20.6 mg, 52% yield.  $^1\text{H NMR}$  (300 MHz,  $\text{CDCl}_3$ )  $\delta$  7.11 – 6.99 (m, 2H), 6.82 – 6.70 (m, 2H), 4.78 (s, 1H), 2.63 (dd,  $J = 9.1, 6.7$  Hz, 2H), 2.23 (ddt,  $J = 7.5, 6.5, 2.1$  Hz, 2H), 1.57 (t,  $J = 3.2$  Hz, 3H).  $^{13}\text{C NMR}$  (101 MHz,  $\text{CDCl}_3$ )  $\delta$

153.69, 152.96 (t,  $J = 281.2$  Hz), 150.16, 133.50, 129.41, 115.18, 84.12 (dd,  $J = 19.5, 18.2$  Hz) 32.67 (t,  $J = 2.0$  Hz), 30.38 (d,  $J = 2.4$  Hz), 11.95 (t,  $J = 2.1$  Hz).  $^{19}\text{F}$  NMR (376 MHz,  $\text{CDCl}_3$ )  $\delta$  -96.81 (d,  $J = 57.6$  Hz, 1F), -97.10 (d,  $J = 57.6$  Hz, 1F).

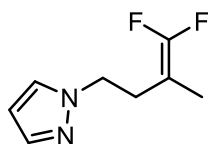

#### 1-(4,4-difluoro-3-methylbut-3-en-1-yl)-1H-pyrazole (9i)

Following the general procedure C, the product was obtained as a colorless oil, 15.5 mg, 45% yield.  $^1\text{H}$  NMR (400 MHz,  $\text{CDCl}_3$ )  $\delta$  7.54 – 7.46 (m, 1H), 7.35 (dd,  $J = 2.3, 0.6$  Hz, 1H), 6.24 (t,  $J = 2.1$  Hz, 1H), 4.20 (t,  $J = 7.1$  Hz, 2H), 2.52 (tt,  $J = 7.1, 2.1$  Hz, 2H), 1.51 (t,  $J = 3.2$  Hz, 3H).  $^{13}\text{C}$  NMR (101 MHz,  $\text{CDCl}_3$ )  $\delta$  153.44 (t,  $J = 284.8$  Hz), 139.37, 128.90, 105.52, 81.77 (t,  $J = 19.7$  Hz), 49.83 (t,  $J = 3.2$  Hz), 29.72 (d,  $J = 2.7$  Hz), 11.90 (t,  $J = 1.9$  Hz).  $^{19}\text{F}$  NMR (377 MHz,  $\text{CDCl}_3$ )  $\delta$  -94.76 (d,  $J = 53.2$  Hz), -95.25 (d,  $J = 53.2$  Hz). HRMS (EI) Calcd. for  $\text{C}_8\text{H}_9\text{F}_2\text{N}_2$   $[\text{M}]^+$ : 171.0728. Found: 171.0731.

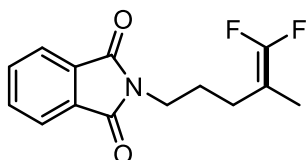

#### 2-(5,5-difluoro-4-methylpent-4-en-1-yl)isoindoline-1,3-dione (9j)

Following the general procedure C, the product was obtained as a white solid, 44.2 mg, 83% yield.  $^1\text{H}$  NMR (300 MHz,  $\text{CDCl}_3$ )  $\delta$  7.86 – 7.78 (m, 2H), 7.75 – 7.65 (m, 2H), 3.68 – 3.60 (m, 2H), 2.03 (tt,  $J = 8.1, 2.2$  Hz, 2H), 1.77 (tt,  $J = 9.3, 6.5$  Hz, 2H), 1.56 (t,  $J = 3.2$  Hz, 3H).  $^{13}\text{C}$  NMR (75 MHz,  $\text{CDCl}_3$ )  $\delta$  168.24, 152.74 (t,  $J = 282.1$  Hz), 133.88, 132.01, 123.15, 83.61 (t,  $J = 19.0$  Hz), 37.39, 25.86 (t,  $J = 2.6$  Hz), 25.57 (t,  $J = 1.8$  Hz), 11.54 (t,  $J = 1.9$  Hz).  $^{19}\text{F}$  NMR (282 MHz,  $\text{CDCl}_3$ )  $\delta$  -96.39 (d,  $J = 57.2$  Hz, 1F), -96.41 (d,  $J = 57.2$  Hz, 1F). HRMS (EI) calcd for  $\text{C}_{14}\text{H}_{13}\text{NO}_2\text{F}_2$   $[\text{M}]^+$ : 265.0909, found: 265.0905.

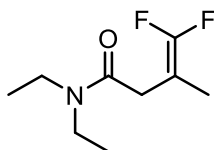

#### N,N-diethyl-4,4-difluoro-3-methylbut-3-enamide (9k)

Following the general procedure C, the product was obtained as a colorless oil, 16.1 mg, 42% yield.  $^1\text{H}$  NMR (300 MHz,  $\text{CDCl}_3$ )  $\delta$  3.32 (m, 3.39-3.25, 4H), 2.99 (t,  $J = 2.0$  Hz, 2H), 1.64 (t,  $J = 3.2$  Hz, 3H), 1.13 (dt,  $J = 19.9, 7.1$  Hz, 6H).  $^{13}\text{C}$  NMR (75 MHz,  $\text{CDCl}_3$ )  $\delta$  168.41 (t,  $J = 3.0$  Hz), 153.27 (t,  $J = 280.7$  Hz), 81.33 (dd,  $J = 22.1, 19.0$  Hz), 41.98, 40.27, 33.17 (d,  $J = 2.8$  Hz), 14.15, 12.93, 12.31.  $^{19}\text{F}$  NMR (282 MHz,  $\text{CDCl}_3$ )  $\delta$  -95.76 (d,  $J = 54.5$  Hz, 1F), -96.06 (d,  $J = 54.5$  Hz, 1F). HRMS (ESI) calcd for  $\text{C}_9\text{H}_{16}\text{F}_2\text{NO}$   $[\text{M}+\text{H}]^+$ : 192.1194, found: 192.1196.

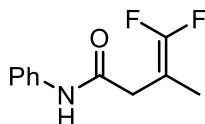

#### 4,4-difluoro-3-methyl-N-phenylbut-3-enamide (9l)

Following the general procedure C, the product was obtained as a white solid, 18.3 mg, 43% yield.;  $^1\text{H NMR}$  (300 MHz,  $\text{CDCl}_3$ )  $\delta$  7.53 – 7.47 (m, 3H), 7.36 – 7.27 (m, 2H), 7.17 – 7.08 (m, 1H), 3.05 (t,  $J = 2.0$  Hz, 2H), 1.71 (t,  $J = 3.3$  Hz, 3H).  $^{13}\text{C NMR}$  (75 MHz,  $\text{CDCl}_3$ )  $\delta$  167.54 (t,  $J = 3.0$  Hz), 154.07 (t,  $J = 282.7$  Hz), 137.43, 128.98, 124.61, 120.02, 80.79 (t,  $J = 20.6$  Hz), 37.22, 12.43.  $^{19}\text{F NMR}$  (282 MHz,  $\text{CDCl}_3$ )  $\delta$  -93.82. **HRMS** (ESI) calcd for  $\text{C}_{11}\text{H}_{12}\text{F}_2\text{NO}$   $[\text{M}+\text{H}]^+$ : 212.0881, found: 212.0885.

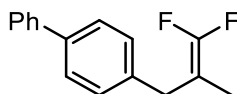

#### 4-(3,3-difluoro-2-methylallyl)-1,1'-biphenyl (9m)

Following the general procedure C, the product was obtained as a colorless oil, 31.8 mg, 65% yield.  $^1\text{H NMR}$  (300 MHz,  $\text{CDCl}_3$ )  $\delta$  7.64 – 7.53 (m, 4H), 7.50 – 7.42 (m, 2H), 7.39 – 7.33 (m, 1H), 7.30 – 7.24 (m, 2H), 3.35 (t,  $J = 2.1$  Hz, 2H), 1.56 (t,  $J = 3.2$  Hz, 3H).  $^{13}\text{C NMR}$  (75 MHz,  $\text{CDCl}_3$ )  $\delta$  153.1 (dd,  $J = 280.5$  Hz, 279.8 Hz), 140.86, 139.43, 137.62 (t,  $J = 2.7$  Hz), 128.96, 128.73, 127.21, 127.15, 126.99, 84.61 (t,  $J = 19.0$  Hz), 34.14 (q,  $J = 1.6$  Hz), 11.84 (t,  $J = 1.6$  Hz).  $^{19}\text{F NMR}$  (282 MHz,  $\text{CDCl}_3$ )  $\delta$  -96.97 (d,  $J = 56.2$  Hz, 1F), -97.23 (d,  $J = 56.2$  Hz, 1F). **HRMS** (EI) calcd for  $\text{C}_{16}\text{H}_{14}\text{F}_2$   $[\text{M}]^+$ : 244.1058, found: 244.1054.

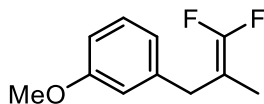

#### 1-(3,3-difluoro-2-methylallyl)-3-methoxybenzene (9n)

Following the general procedure C, the product was obtained as a colorless oil, 21.8 mg, 55% yield.  $^1\text{H NMR}$  (300 MHz,  $\text{CDCl}_3$ )  $\delta$  7.23 (dd,  $J = 8.3, 7.4$  Hz, 1H), 6.82 – 6.71 (m, 3H), 3.81 (s, 3H), 3.27 (t,  $J = 2.1$  Hz, 2H), 1.51 (t,  $J = 3.2$  Hz, 3H).  $^{13}\text{C NMR}$  (75 MHz,  $\text{CDCl}_3$ )  $\delta$  159.72, 153.27 (dd, 280.5 Hz, 279.8 Hz), 140.15 (t,  $J = 2.6$  Hz), 129.42, 120.96, 114.36, 111.57, 84.57 (t,  $J = 19.0$  Hz), 55.13, 34.50 (t,  $J = 2.0$  Hz), 11.78 (t,  $J = 1.7$  Hz).  $^{19}\text{F NMR}$  (282 MHz,  $\text{CDCl}_3$ )  $\delta$  -97.11 (d,  $J = 56.4$  Hz, 1F), -97.36 (d,  $J = 56.4$  Hz, 1F). **HRMS** (EI) calcd for  $\text{C}_{11}\text{H}_{12}\text{OF}_2$   $[\text{M}]^+$ : 198.0851, found: 198.0852.

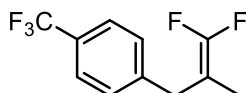

#### 1-(3,3-difluoro-2-methylallyl)-4-(trifluoromethyl)benzene (9o)

Following the general procedure C, the product was obtained as a colorless oil, 17 mg, 36% yield. Colorless oil;  $^1\text{H NMR}$  (400 MHz,  $\text{CDCl}_3$ )  $\delta$  7.52 (d,  $J = 8.0$  Hz, 2H), 7.25 (d,  $J = 8.0$  Hz, 2H), 3.31 (d,  $J = 2.0$  Hz, 2H), 1.46 (t,  $J = 3.2$  Hz, 3H).  $^{13}\text{C NMR}$  (101 MHz,  $\text{CDCl}_3$ )  $\delta$  153.47 (dd, 283.8 Hz, 283.7 Hz), 142.67, 129.10, 128.84, 125.45 (q,  $J = 3.8$  Hz), 122.87, 84.03 (t,  $J = 19.4$  Hz), 34.39 (t,  $J = 1.9$  Hz), 11.75 (d,  $J = 1.9$  Hz).  $^{19}\text{F NMR}$  (377 MHz,  $\text{CDCl}_3$ )  $\delta$  -62.98 (s, 3H), -96.37 (d,  $J = 56.6$  Hz, 1F), -96.59 (d,  $J = 56.6$  Hz, 1F). **HRMS** (EI) calcd for  $\text{C}_{11}\text{H}_9\text{F}_5$   $[\text{M}]^+$ : 236.0624, found: 236.0623.

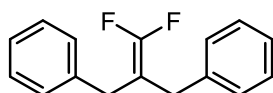

**(2-(difluoromethylene)propane-1,3-diyl)dibenzene (9p)**

Following the general procedure C, the product was obtained as a colorless oil, 14.6 mg, 30% yield.  $^1\text{H NMR}$  (400 MHz,  $\text{CDCl}_3$ )  $\delta$  7.34 – 7.28 (m, 4H), 7.26 – 7.20 (m, 2H), 7.17 – 7.11 (m, 4H), 3.21 (d,  $J$  = 2.1 Hz, 4H).  $^{13}\text{C NMR}$  (101 MHz,  $\text{CDCl}_3$ )  $\delta$  154.22 (t,  $J$  = 284.6 Hz), 138.30 (t,  $J$  = 2.6 Hz), 128.76, 128.50, 126.49, 88.97 (t,  $J$  = 17.4 Hz), 31.54 (t,  $J$  = 1.6 Hz).  $^{19}\text{F NMR}$  (376 MHz,  $\text{CDCl}_3$ )  $\delta$  -96.59. **HRMS** (EI) calcd for  $\text{C}_{16}\text{H}_{14}\text{F}_2$   $[\text{M}]^+$ : 244.1058, found: 244.1051.

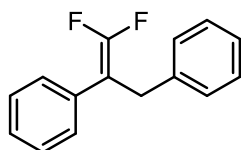

**(3,3-difluoroprop-2-ene-1,2-diyl)dibenzene (9q)**

Following the general procedure C, the product was obtained as a colorless oil, 26.3 mg, 57% yield.  $^1\text{H NMR}$  (300 MHz,  $\text{CDCl}_3$ )  $\delta$  7.33 – 7.27 (m, 4H), 7.27 – 7.22 (m, 3H), 7.22 – 7.14 (m, 3H), 3.75 (t,  $J$  = 2.3 Hz, 2H).  $^{13}\text{C NMR}$  (75 MHz,  $\text{CDCl}_3$ )  $\delta$  154.38 (dd,  $J$  = 291.8, 287.4 Hz), 138.43 (t,  $J$  = 2.7 Hz), 133.48 (t,  $J$  = 3.8 Hz), 128.45, 128.33, 128.24 (t,  $J$  = 3.4 Hz), 127.25, 126.37, 91.66 (dd,  $J$  = 21.4, 13.6 Hz), 33.89 (d,  $J$  = 1.9 Hz).  $^{19}\text{F NMR}$  (282 MHz,  $\text{CDCl}_3$ )  $\delta$  -90.87 (d,  $J$  = 40.1 Hz, 1F), -91.43 (d,  $J$  = 40.0 Hz, 1F). **HRMS** (EI) calcd for  $\text{C}_{15}\text{H}_{12}\text{F}_2$   $[\text{M}]^+$ : 230.0902, found: 230.0904.

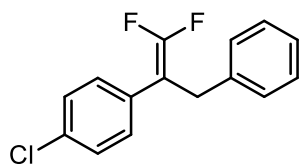

**chloro-4-(1,1-difluoro-3-phenylprop-1-en-2-yl)benzene (9r)**

Following the general procedure C, the product was obtained as a colorless oil, 26.9 mg, 51% yield.  $^1\text{H NMR}$  (300 MHz,  $\text{CDCl}_3$ )  $\delta$  7.31 – 7.23 (m, 4H), 7.23 - 7.20 (m, 2H), 7.19 – 7.12 (m, 3H), 3.72 (t,  $J$  = 2.3 Hz, 2H).  $^{13}\text{C NMR}$  (75 MHz,  $\text{CDCl}_3$ )  $\delta$  154.35 (dd,  $J$  = 292.2, 288.1 Hz), 138.00 (t,  $J$  = 2.6 Hz), 133.10, 131.89 (t,  $J$  = 3.7 Hz), 129.56 (t,  $J$  = 3.6 Hz), 128.56 (d,  $J$  = 1.7 Hz), 128.21, 126.54, 90.96 (dd,  $J$  = 22.0, 13.6 Hz), 33.75.  $^{19}\text{F NMR}$  (282 MHz,  $\text{CDCl}_3$ )  $\delta$  -90.21 (d,  $J$  = 38.7 Hz, 1F), -90.63 (d,  $J$  = 38.8 Hz, 1F). **HRMS** (EI) calcd for  $\text{C}_{15}\text{H}_{11}\text{F}_2\text{Cl}$   $[\text{M}]^+$ : 254.0512, found: 254.0506.

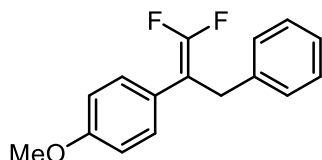

**1-(1,1-difluoro-3-phenylprop-1-en-2-yl)-4-methoxybenzene (9s)**

Following the general procedure C, the product was obtained as a colorless oil, 29.2 mg, 56% yield.  $^1\text{H NMR}$   $\delta$  7.18 – 7.12 (m, 2H), 7.12 – 7.05 (m, 5H), 6.76 – 6.70 (m, 2H), 3.68 (s, 3H), 3.62 (t,  $J$  = 2.3 Hz, 2H).  $^{13}\text{C NMR}$  (101 MHz,  $\text{CDCl}_3$ )  $\delta$  158.62, 154.23 (dd,  $J$  = 290.6, 286.8 Hz), 138.56 (t,  $J$  = 2.6 Hz), 129.38 (t,  $J$  = 3.5 Hz), 128.43, 128.27, 126.33, 113.79, 91.13 (dd,  $J$  = 21.3, 13.9 Hz), 55.15, 33.99 (d,  $J$  = 2.5 Hz).  $^{19}\text{F NMR}$  (376 MHz,  $\text{CDCl}_3$ )  $\delta$  -92.01 (d,  $J$  = 42.9 Hz, 1F), -92.41 (d,  $J$  = 42.9 Hz, 1F). **HRMS** (EI) calcd for  $\text{C}_{16}\text{H}_{14}\text{OF}_2\text{Cl}$   $[\text{M}]^+$ : 260.1007, found: 260.1003.



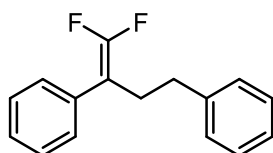

**(4,4-difluorobut-3-ene-1,3-diyl)dibenzene (9t)**

Following the general procedure C, the product was obtained as a colorless oil, 21.1 mg, 43% yield.  $^1\text{H NMR}$  (300 MHz,  $\text{CDCl}_3$ )  $\delta$  7.44 – 7.26 (m, 7H), 7.25 – 7.07 (m, 3H), 2.78 – 2.59 (m, 4H).  $^{13}\text{C NMR}$  (101 MHz,  $\text{CDCl}_3$ )  $\delta$  153.72 (dd,  $J = 290.8, 287.0$  Hz), 141.00, 133.46 (dd,  $J = 4.5, 3.2$  Hz), 128.48, 128.36 (d,  $J = 3.2$  Hz), 128.28 (t,  $J = 3.2$  Hz), 127.30, 126.07, 91.81 (dd,  $J = 21.6, 13.3$  Hz), 34.01 (t,  $J = 2.6$  Hz), 29.67 (d,  $J = 1.6$  Hz).  $^{19}\text{F NMR}$  (282 MHz,  $\text{CDCl}_3$ )  $\delta$  -91.58 (d,  $J = 42.5$  Hz, 1F), -92.02 (d,  $J = 42.5$  Hz, 1F). **HRMS** (EI) calcd for  $\text{C}_{16}\text{H}_{14}\text{F}_2$   $[\text{M}]^+$ : 244.1058, found: 244.1056.

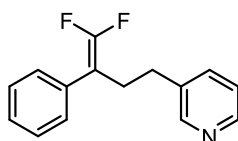

**3-(4,4-difluoro-3-phenylbut-3-en-1-yl)pyridine (9u)**

Following the general procedure C, the product was obtained as a colorless oil, 23.5 mg, 48% yield.  $^1\text{H NMR}$  (400 MHz,  $\text{CDCl}_3$ )  $\delta$  8.41 (dd,  $J = 4.9, 1.6$  Hz, 1H), 8.33 (d,  $J = 2.2$  Hz, 1H), 7.42 (dt,  $J = 7.8, 2.0$  Hz, 1H), 7.37 – 7.30 (m, 2H), 7.29 – 7.22 (m, 3H), 7.20 – 7.14 (m, 1H), 2.73 – 2.59 (m, 4H).  $^{13}\text{C NMR}$  (101 MHz,  $\text{CDCl}_3$ )  $\delta$  153.76 (dd,  $J = 291.2, 287.5$  Hz), 149.58, 147.35, 136.24, 136.11, 132.92 (dd,  $J = 14.3, 11.3$  Hz), 128.61, 128.23 (t,  $J = 3.2$  Hz), 127.51, 123.36, 91.23 (dd,  $J = 21.3, 14.2$  Hz), 30.97 (t,  $J = 2.7$  Hz), 29.12 (d,  $J = 1.7$  Hz).  $^{19}\text{F NMR}$  (377 MHz,  $\text{CDCl}_3$ )  $\delta$  -91.24 (d,  $J = 41.5$  Hz), -91.53 (d,  $J = 41.5$  Hz). **HRMS** (EI) Calcd. for  $\text{C}_{15}\text{H}_{13}\text{F}_2\text{N}$   $[\text{M}]^+$ : 245.1009. Found: 245.1008.

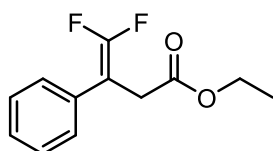

**ethyl 4,4-difluoro-3-phenylbut-3-enoate (9v)**

Following the general procedure C, the product was obtained as a colorless oil, 17.6 mg, 39% yield.  $^1\text{H NMR}$  (300 MHz,  $\text{CDCl}_3$ )  $\delta$  7.40 – 7.26 (m, 5H), 4.13 (q,  $J = 7.1$  Hz, 2H), 3.40 (dd,  $J = 2.5, 2.0$  Hz, 2H), 1.20 (t,  $J = 7.1$  Hz, 3H).  $^{13}\text{C NMR}$  (75 MHz,  $\text{CDCl}_3$ )  $\delta$  170.13 (dd,  $J = 3.0$  Hz, 2.6 Hz), 154.78 (dd,  $J = 292.4, 289.0$  Hz), 133.02 (t,  $J = 3.8$  Hz), 128.48, 127.83 (t,  $J = 3.5$  Hz), 127.52, 87.16 (dd,  $J = 21.5, 17.7$  Hz), 61.09, 33.88 (d,  $J = 2.6$  Hz), 14.05.  $^{19}\text{F NMR}$  (282 MHz,  $\text{CDCl}_3$ )  $\delta$  -88.41 (d,  $J = 35.3$  Hz, 1F), -89.69 (d,  $J = 35.3$  Hz, 1F). **HRMS** (EI) calcd for  $\text{C}_{12}\text{H}_{12}\text{F}_2\text{O}_2$   $[\text{M}]^+$ : 226.0805, found: 226.0808.

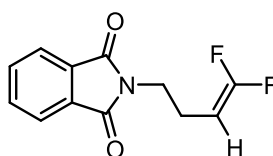

**2-(4,4-difluorobut-3-en-1-yl)isoindoline-1,3-dione (9w)**

Following the general procedure C, the product was obtained as a white solid, 15.9 mg, 34% yield.  $^1\text{H NMR}$  (300 MHz,  $\text{CDCl}_3$ )  $\delta$  7.89 – 7.79 (m, 2H), 7.76 – 7.67 (m, 2H), 4.18 (dtd,  $J = 24.9, 7.9, 2.1$  Hz,

1H), 3.73 (td,  $J = 7.0, 0.8$  Hz, 2H), 2.44 – 2.32 (m, 2H).  $^{13}\text{C}$  NMR (75 MHz,  $\text{CDCl}_3$ )  $\delta$  168.31, 156.36 (dd,  $J = 287.6, 285.4$  Hz), 133.93, 132.04, 123.21, 76.92 (d,  $J = 2.1$  Hz), 37.18, 28.25 (t,  $J = 2.4$  Hz), 19.71 (d,  $J = 4.6$  Hz).  $^{19}\text{F}$  NMR (282 MHz,  $\text{CDCl}_3$ )  $\delta$  -87.00 (d,  $J = 42.6$  Hz, 1F), -90.05 (d,  $J = 42.6$  Hz, 1F). HRMS (EI) calcd for  $\text{C}_{12}\text{H}_9\text{NF}_2\text{O}_2$   $[\text{M}]^+$ :237.0596, found: 237.0597.

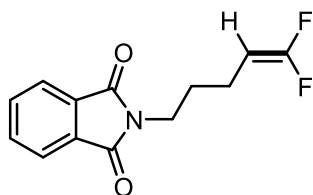

#### 2-(5,5-difluoropent-4-en-1-yl)isoindoline-1,3-dione (9x)

Following the general procedure C, the product was obtained as a white solid, 15.8 mg, 31% yield.  $^1\text{H}$  NMR (400 MHz,  $\text{CDCl}_3$ )  $\delta$  7.84 (dd,  $J = 5.4, 3.0$  Hz, 2H), 7.71 (dd,  $J = 5.5, 3.0$  Hz, 2H), 4.20 (dtd,  $J = 25.2, 7.8, 2.4$  Hz, 1H), 3.73 – 3.66 (m, 2H), 2.04 (qt,  $J = 7.8, 1.9$  Hz, 2H), 1.76 (p,  $J = 7.4$  Hz, 2H).  $^{13}\text{C}$  NMR (101 MHz,  $\text{CDCl}_3$ )  $\delta$  168.31, 159.21, 156.37, 156.35, 153.52, 133.93, 132.04, 123.21, 77.32, 77.14, 77.00, 76.93, 76.91, 76.68, 37.18, 28.27, 28.25, 28.23, 19.73, 19.69.  $^{19}\text{F}$  NMR (282 MHz,  $\text{CDCl}_3$ )  $^{19}\text{F}$  NMR (377 MHz,  $\text{CDCl}_3$ )  $\delta$  -88.91 (d,  $J = 46.4$  Hz), -91.13 (d,  $J = 46.4$  Hz). HRMS (EI) calcd for  $\text{C}_{13}\text{H}_{11}\text{NO}_2\text{F}_2$   $[\text{M}]^+$ :251.0752, found: 251.0748.

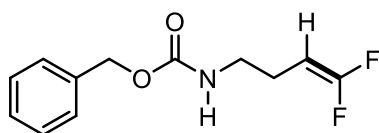

#### benzyl (4,4-difluorobut-3-en-1-yl)carbamate (9y)

Following the general procedure C, the product was obtained as a white solid, 18.5 mg, 38% yield.  $^1\text{H}$  NMR (300 MHz,  $\text{CDCl}_3$ )  $\delta$  7.35 (m, 5H), 5.10 (s, 2H), 4.87 (s, 1H), 4.15 (dtd,  $J = 25.1, 7.9, 2.2$  Hz, 1H), 3.24 (q,  $J = 6.6$  Hz, 2H), 2.28 – 2.11 (m, 2H).  $^{13}\text{C}$  NMR (75 MHz,  $\text{CDCl}_3$ )  $^{13}\text{C}$  NMR (75 MHz, Chloroform-*d*)  $\delta$  156.31, 156.94 (dd, 285.0 Hz, 284.3 Hz), 136.40, 128.51, 128.13, 128.07, 74.95 (dd, 21.0 Hz, 20.3 Hz), 66.73, 40.43, 23.18 (d,  $J = 4.3$  Hz).  $^{19}\text{F}$  NMR (282 MHz,  $\text{CDCl}_3$ )  $\delta$  -87.37 (d,  $J = 44.0$  Hz, 1F), -90.39 (d,  $J = 44.1$  Hz, 1F). HRMS (ESI) calcd for  $[\text{M}+\text{H}]^+$ :242.0987, found: 242.0988.

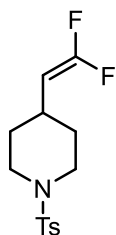

#### 4-(2,2-difluorovinyl)-1-tosylpiperidine (9z)

Following the general procedure C, the product was obtained as a colorless oil, 29.5 mg, 49% yield.  $^1\text{H}$  NMR (400 MHz,  $\text{CDCl}_3$ )  $\delta$  7.66 – 7.59 (m, 2H), 7.32 (d,  $J = 7.9$  Hz, 2H), 4.02 (ddd,  $J = 25.4, 9.3, 2.7$  Hz, 1H), 3.71 (dt,  $J = 11.6, 3.5$  Hz, 2H), 2.43 (s, 3H), 2.30 (td,  $J = 11.9, 2.7$  Hz, 2H), 2.18 – 2.00 (m, 1H), 1.78 – 1.68 (m, 2H), 1.54 – 1.42 (m, 2H).  $^{13}\text{C}$  NMR (101 MHz,  $\text{CDCl}_3$ )  $\delta$  155.87 (t,  $J = 288.8$  Hz), 143.51, 132.93, 129.59, 127.65, 81.77 (dd,  $J = 20.8, 19.7$  Hz), 45.85, 31.46 (t,  $J = 2.3$  Hz), 29.86 (d,  $J = 4.5$  Hz), 21.47.  $^{19}\text{F}$  NMR (377 MHz,  $\text{CDCl}_3$ )  $\delta$  -89.08 (d,  $J = 46.0$  Hz, 1F), -89.82 (d,  $J = 45.9$  Hz, 1F). HRMS (ESI) calcd for  $[\text{M}+\text{H}]^+$ : 302.1021, found: 302.1026.

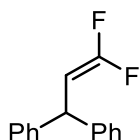

**(3,3-difluoroprop-2-ene-1,1-diyl)dibenzene (9aa)**

Following the general procedure C, the product was obtained as a white solid, 40 mg, 87% yield.  $^1\text{H NMR}$  (400 MHz,  $\text{CDCl}_3$ )  $\delta$  7.26 – 7.19 (m, 4H), 7.17 – 7.06 (m, 6H), 4.83 – 4.77 (m, 1H), 4.69 (ddd,  $J = 23.8, 10.5, 2.4$  Hz, 1H).  $^{13}\text{C NMR}$  (101 MHz,  $\text{CDCl}_3$ )  $\delta$  155.96 (dd,  $J = 288.7, 287.4$  Hz), 143.09 (t,  $J = 2.1$  Hz), 128.60, 127.89, 126.69, 82.00 (dd,  $J = 22.3, 19.1$  Hz), 44.52 (d,  $J = 4.9$  Hz).  $^{19}\text{F NMR}$  (377 MHz,  $\text{CDCl}_3$ )  $\delta$  -88.70 (d,  $J = 42.7$  Hz, 1F), -90.43 (d,  $J = 42.8$  Hz, 1F). **HRMS** (EI) calcd. for  $\text{C}_{15}\text{H}_{11}\text{F}_2$   $[\text{M}]^+$ : 229.0823, found: 229.0826.

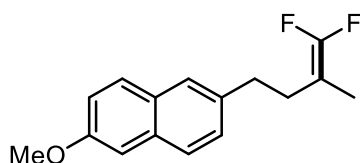

**2-(4,4-difluoro-3-methylbut-3-en-1-yl)-6-methoxynaphthalene (9ab)**

Following the general procedure C, the product was obtained as a colorless oil, 24.3 mg, 46% yield.  $^1\text{H NMR}$  (300 MHz,  $\text{CDCl}_3$ )  $\delta$  7.72 – 7.65 (m, 2H), 7.56 (dt,  $J = 1.4, 0.8$  Hz, 1H), 7.31 (dd,  $J = 8.4, 1.7$  Hz, 1H), 7.17 – 7.11 (m, 2H), 3.92 (s, 3H), 2.84 (dd,  $J = 9.2, 6.7$  Hz, 2H), 2.36 (ddt,  $J = 7.7, 6.4, 2.2$  Hz, 2H), 1.62 (t,  $J = 3.2$  Hz, 3H).  $^{13}\text{C NMR}$  (75 MHz,  $\text{CDCl}_3$ )  $\delta$  157.20, 152.95 (dd,  $J = 280.5$  Hz, 279.8 Hz), 136.39, 133.05, 129.03, 128.90, 127.54, 126.79, 126.26, 118.72, 105.59, 84.22 (dd,  $J = 18.8$  Hz, 18.0 Hz), 55.25, 33.57 (t,  $J = 2.6$  Hz), 30.18 (d,  $J = 2.3$  Hz), 12.02 (t,  $J = 2.1$  Hz).  $^{19}\text{F NMR}$  (282 MHz,  $\text{CDCl}_3$ )  $\delta$  -96.62 (d,  $J = 57.4$  Hz, 1F), -96.97 (d,  $J = 57.4$  Hz, 1F). **HRMS** (EI) calcd for  $\text{C}_{16}\text{H}_{16}\text{F}_2\text{O}$   $[\text{M}]^+$ : 262.1164, found: 262.1164.

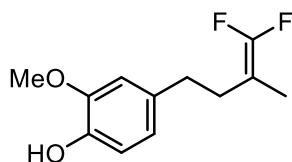

**4-(4,4-difluoro-3-methylbut-3-en-1-yl)-2-methoxyphenol (9ac)**

Following the general procedure C, the product was obtained as a colorless oil, 26.5 mg, 58% yield.  $^1\text{H NMR}$  (400 MHz,  $\text{CDCl}_3$ )  $\delta$  6.84 (d,  $J = 8.5$  Hz, 1H), 6.70 – 6.65 (m, 2H), 5.50 (s, 1H), 3.88 (s, 3H), 2.64 (dd,  $J = 9.1, 6.7$  Hz, 2H), 2.25 (tt,  $J = 8.0, 2.1$  Hz, 2H), 1.58 (t,  $J = 3.2$  Hz, 3H).  $^{13}\text{C NMR}$  (101 MHz,  $\text{CDCl}_3$ )  $\delta$  152.95 (dd,  $J = 282.3, 281.4$  Hz), 146.36, 143.83, 133.14, 120.91, 114.20, 110.79, 84.18 (dd,  $J = 19.4, 18.3$  Hz), 55.86, 33.22 (t,  $J = 2.7$  Hz), 30.35 (d,  $J = 2.2$  Hz), 11.94.  $^{19}\text{F NMR}$  (377 MHz,  $\text{CDCl}_3$ )  $\delta$  -96.79 (d,  $J = 57.8$  Hz, 1F), -97.11 (d,  $J = 57.7$  Hz, 1F). **HRMS** (EI) calcd for  $\text{C}_{12}\text{H}_{14}\text{F}_2\text{O}_2$   $[\text{M}]^+$ : 228.0956, found: 228.0956.

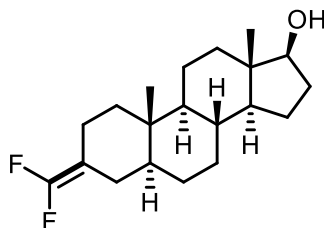

**3-(difluoromethylene)-10,13-dimethylhexadecahydro-1H-cyclopenta[a]phenanthren-17-ol (9ad)**

Following the general procedure C, the product was obtained as a white solid, 27.2 mg, 48% yield. **<sup>1</sup>H NMR** (300 MHz, CDCl<sub>3</sub>) δ 3.62 (dd, *J* = 9.0, 8.0 Hz, 1H), 2.34 – 2.20 (m, 1H), 2.04 (dtd, *J* = 13.2, 9.2, 5.7 Hz, 2H), 1.90 (tddd, *J* = 14.7, 6.2, 3.4, 1.4 Hz, 1H), 1.83 – 1.61 (m, 4H), 1.61 – 1.51 (m, 2H), 1.48 – 1.29 (m, 4H), 1.29 – 0.83 (m, 8H), 0.84 (d, *J* = 0.7 Hz, 3H), 0.73 (d, *J* = 0.7 Hz, 3H), 0.65 (ddd, *J* = 12.3, 10.4, 4.2 Hz, 1H). **<sup>13</sup>C NMR** (75 MHz, CDCl<sub>3</sub>) δ 150.62 (t, *J* = 280.3 Hz), 87.60 (t, *J* = 18.5 Hz), 81.90, 54.22, 50.95, 46.22 (t, *J* = 1.8 Hz), 42.91, 37.92 (t, *J* = 1.5 Hz), 36.67, 36.09, 35.43, 31.35, 30.47, 28.43, 26.62 (d, *J* = 1.8 Hz), 23.34, 20.54, 19.86 (t, *J* = 2.3 Hz), 11.38, 11.12. **<sup>19</sup>F NMR** (282 MHz, CDCl<sub>3</sub>) δ -99.52 (d, *J* = 63.3 Hz, 1F), -99.92 (d, *J* = 63.2 Hz, 1F). **HRMS** (EI) calcd for C<sub>20</sub>H<sub>30</sub>F<sub>2</sub>O [M]<sup>+</sup>: 324.2259, found: 324.2258.

## 7. References

1. Harris, R.; Becker, E.; De Menezes, S. C.; Goodfellow, R.; Granger, P.; Int, C., Union Pure Applied. *Magn. Reson. Chem.* **2002**, *40*, 489-505.
2. Gottlieb, H. E.; Kotlyar, V.; Nudelman, A., NMR Chemical Shifts of Common Laboratory Solvents as Trace Impurities. *J. Org. Chem.* **1997**, *62*, 7512-7515.
3. Zhang, B.-H.; Lei, L.-S.; Liu, S.-Z.; Mou, X.-Q.; Liu, W.-T.; Wang, S.-H.; Wang, J.; Bao, W.; Zhang, K., Zinc-promoted cyclization of tosylhydrazones and 2-(dimethylamino)malononitrile: an efficient strategy for the synthesis of substituted 1-tosyl-1H-pyrazoles. *Chem. Commun.* **2017**, *53*, 8545-8548.
4. Gavara, L.; Petit, C.; Montchamp, J.-L., DBU-promoted alkylation of alkyl phosphinates and H-phosphonates. *Tetrahedron Lett.* **2012**, *53*, 5000-5003.
5. Stepen, A. J.; Bursch, M.; Grimme, S.; Stephan, D. W.; Paradies, J., Electrophilic Phosphonium Cation-Mediated Phosphane Oxide Reduction Using Oxalyl Chloride and Hydrogen. *Angew. Chem. Int. Ed.* **2018**, *57*, 15253-15256.

## 8. Copies of NMR spectra

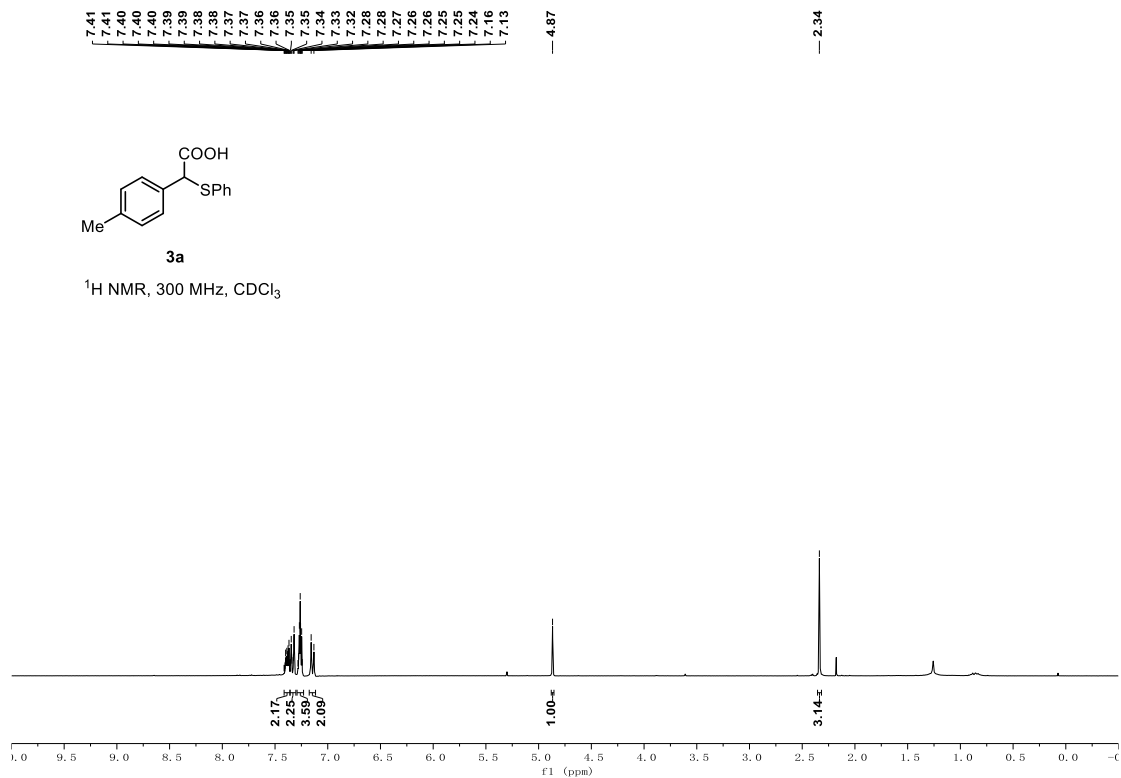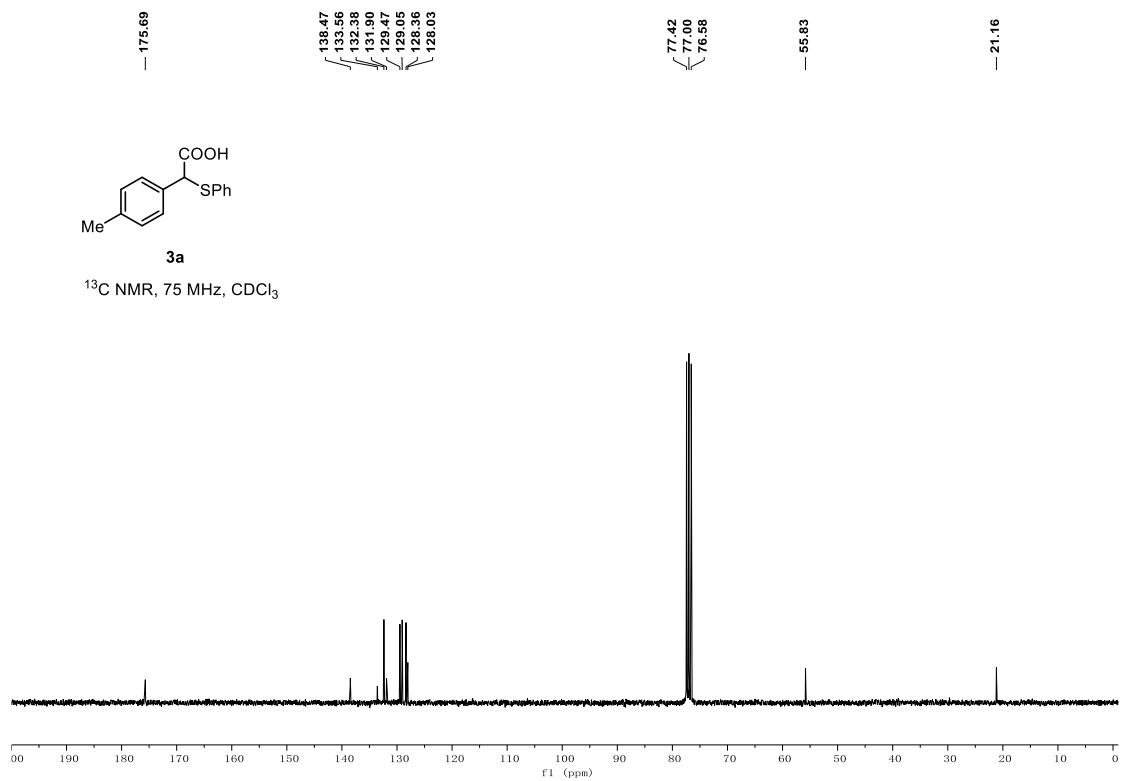

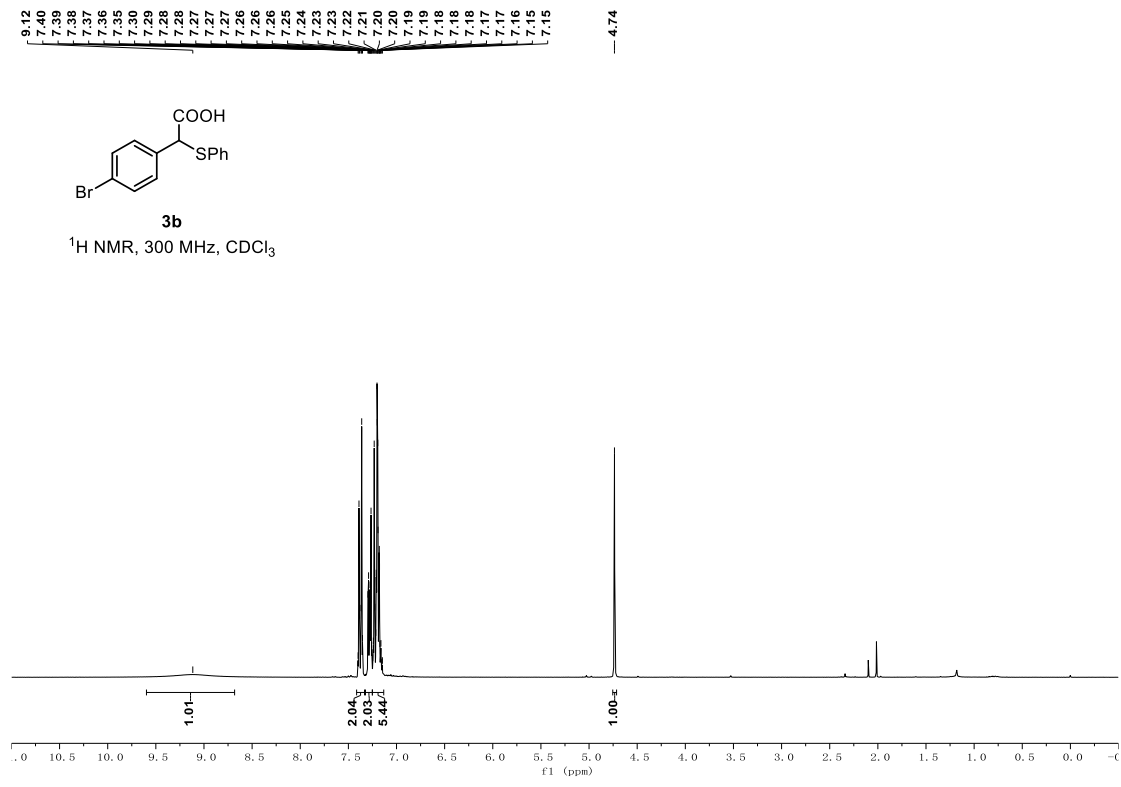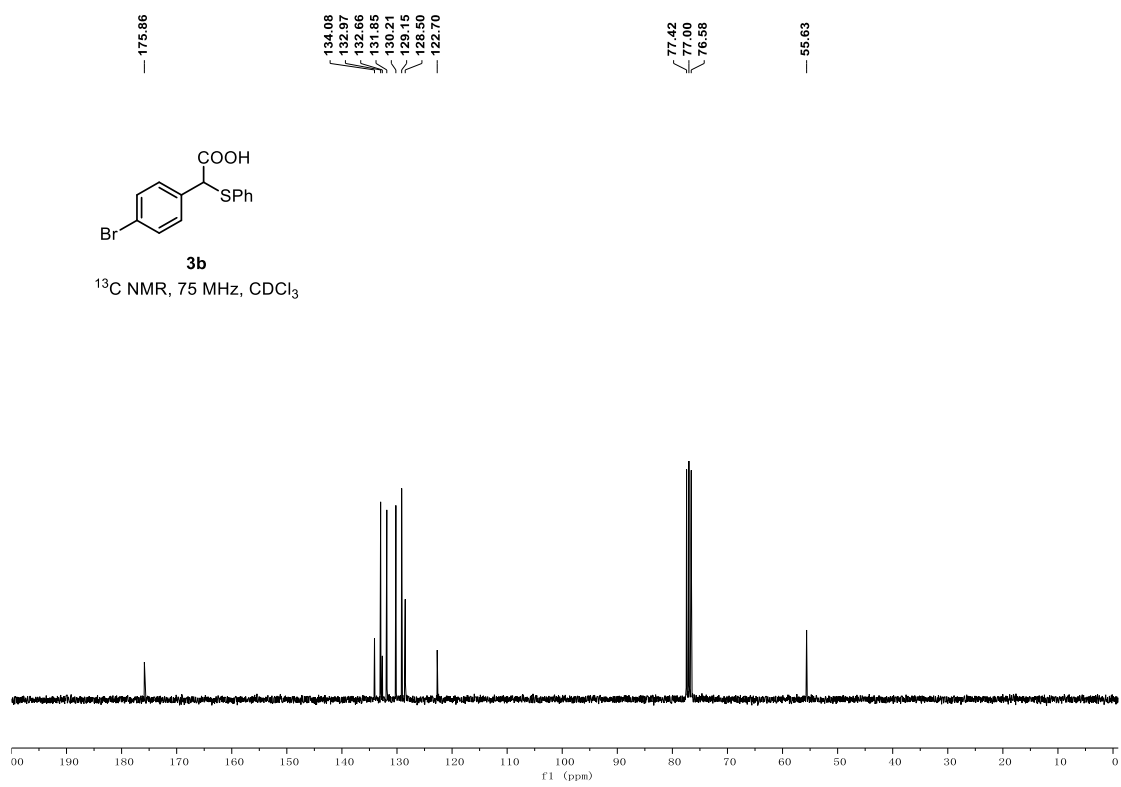

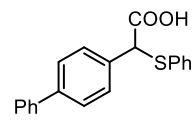

**3c**

<sup>1</sup>H NMR, 300 MHz, CDCl<sub>3</sub>

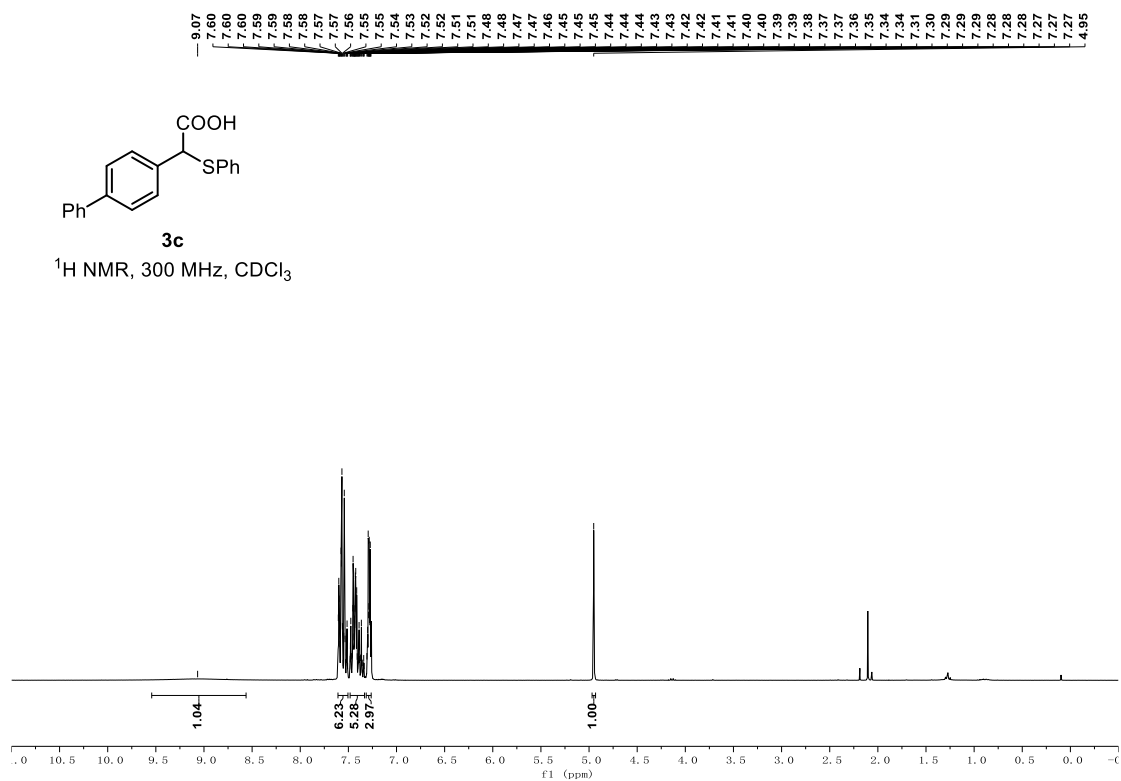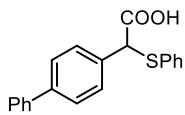

**3c**

<sup>13</sup>C NMR, 75 MHz, CDCl<sub>3</sub>

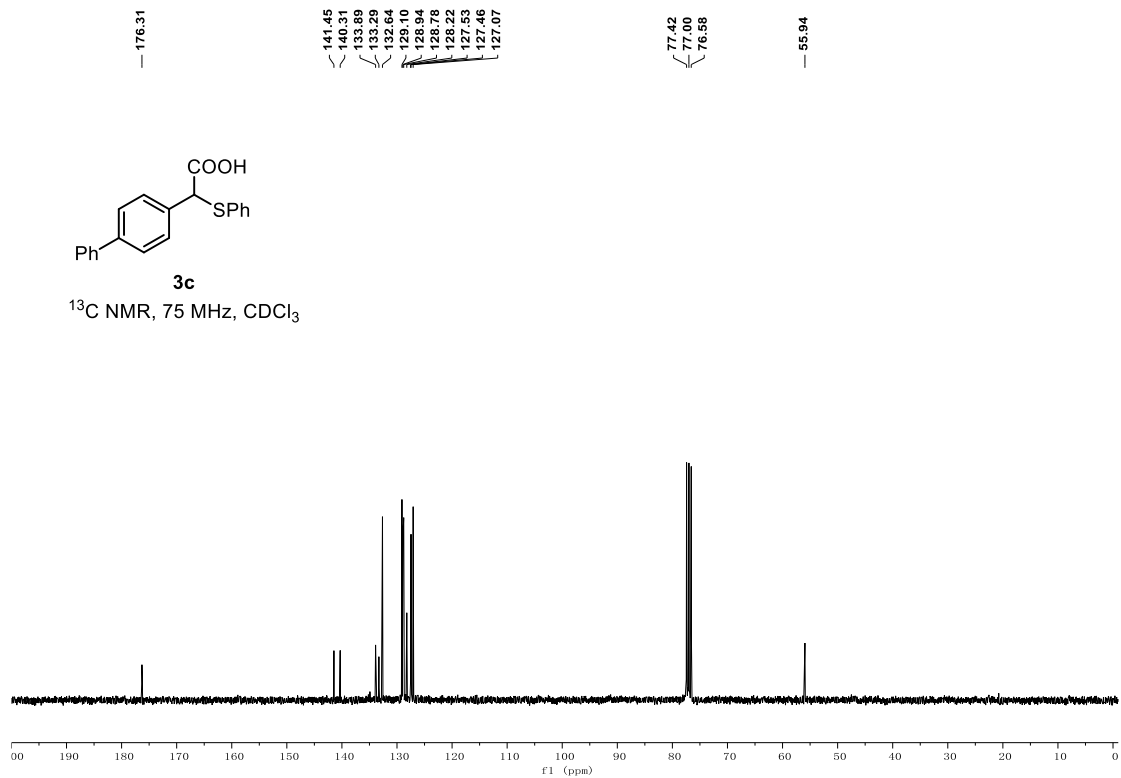



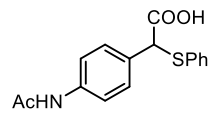

**3d**

<sup>1</sup>H NMR, 400 MHz, DMSO-*d*<sub>6</sub>

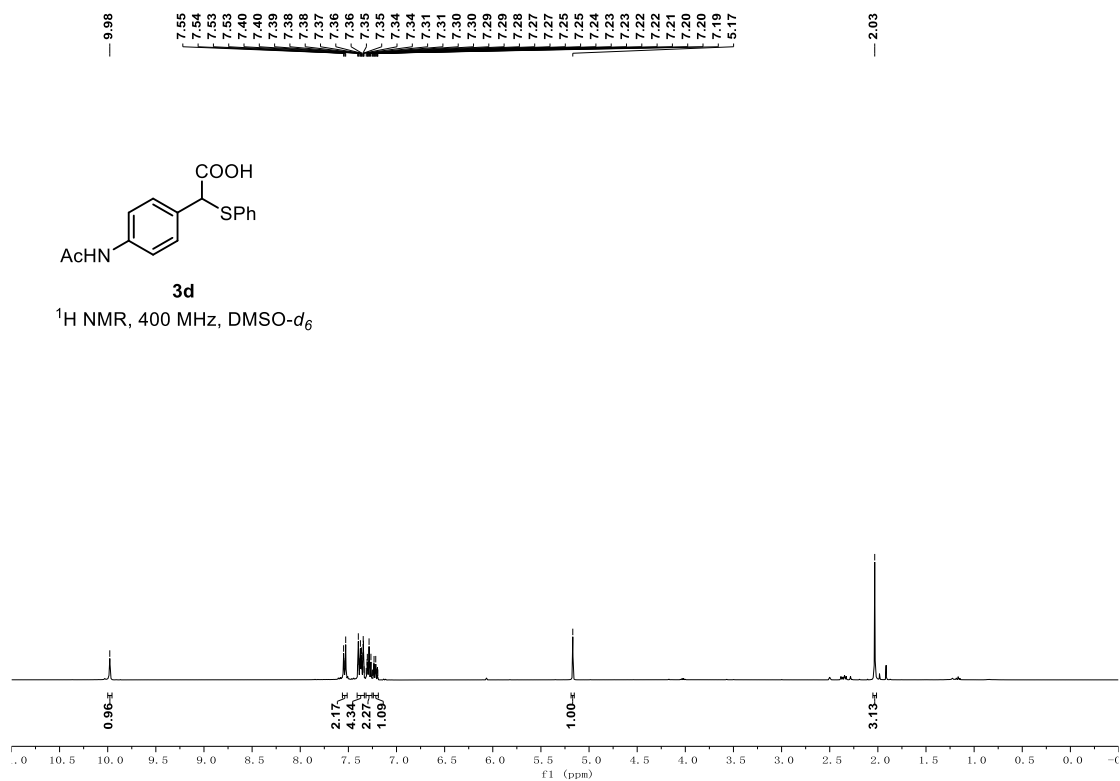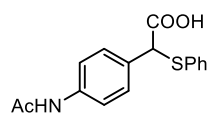

**3d**

<sup>13</sup>C NMR, 100 MHz, DMSO-*d*<sub>6</sub>

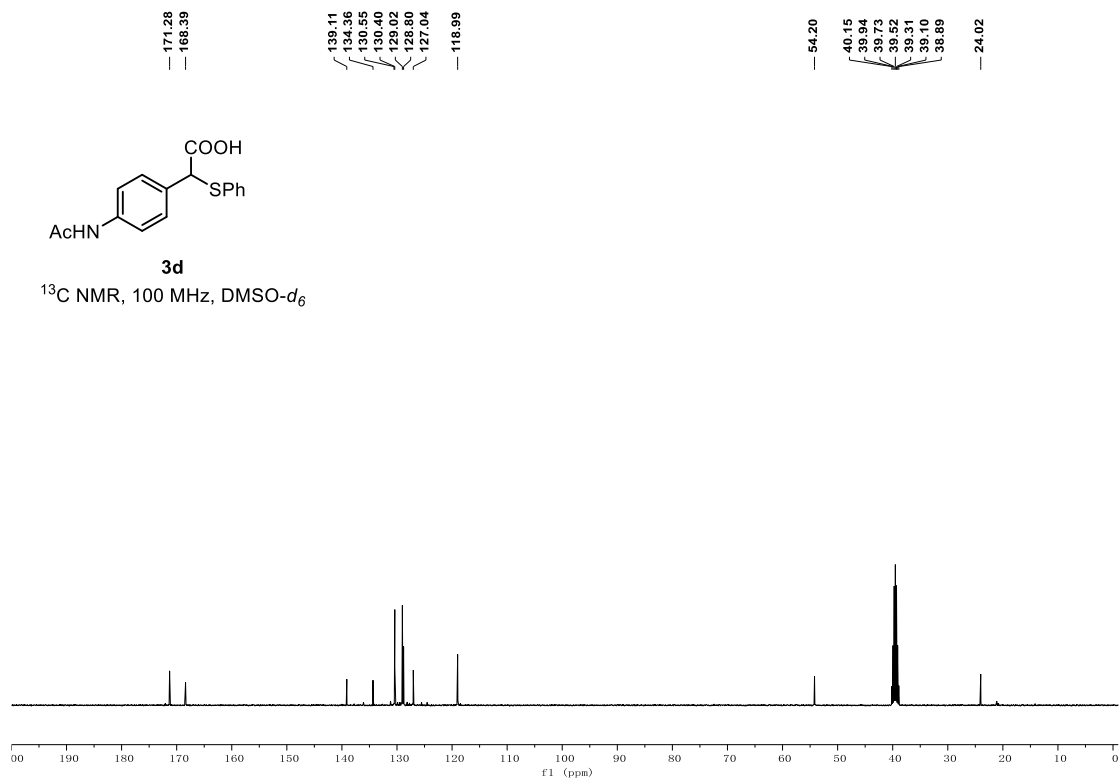

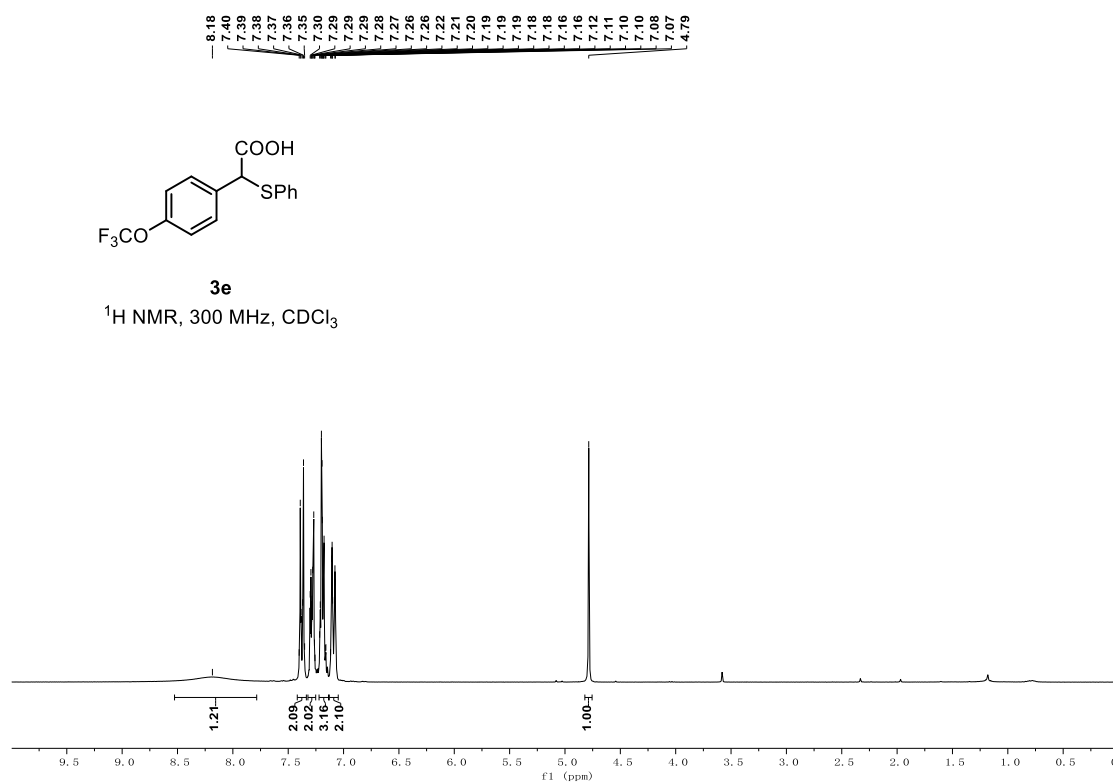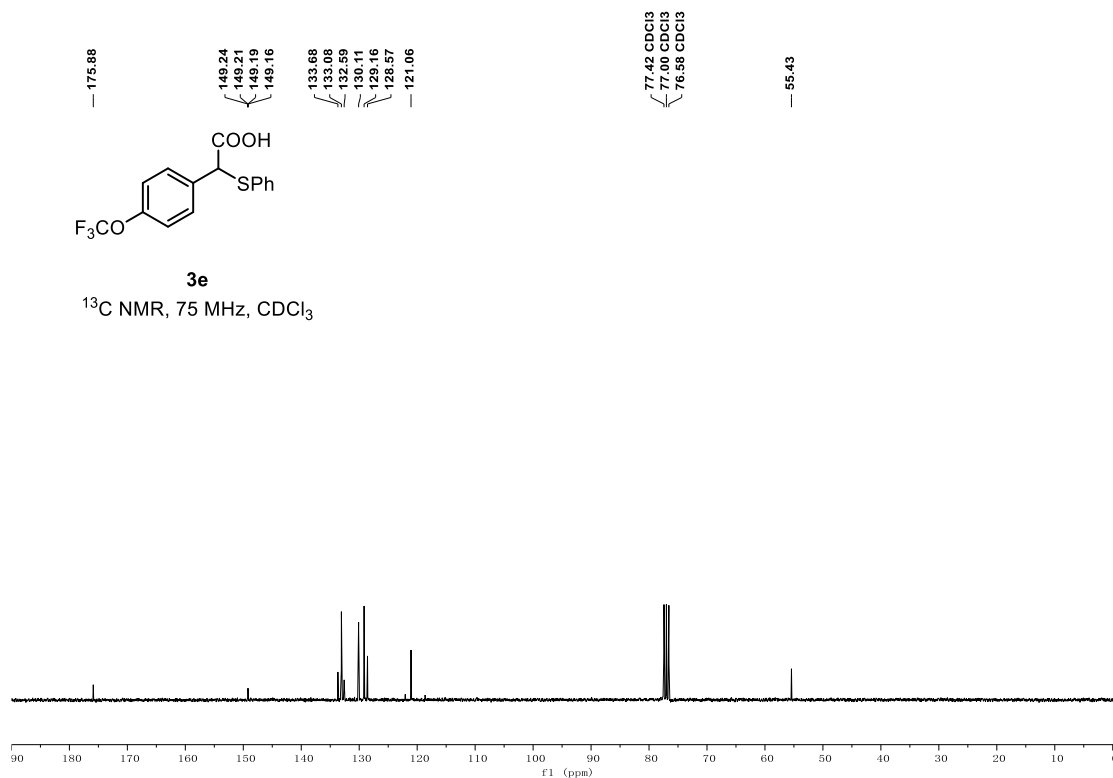

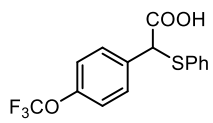

**3e**

<sup>19</sup>F NMR, 282 MHz, CDCl<sub>3</sub>

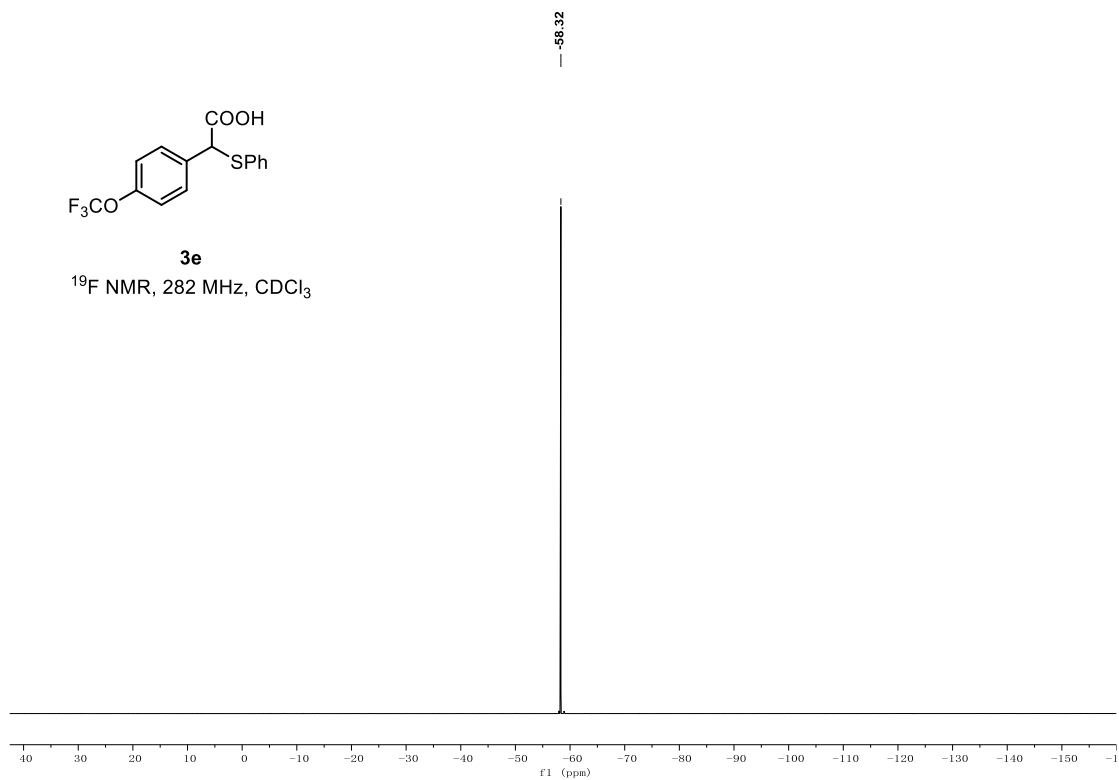

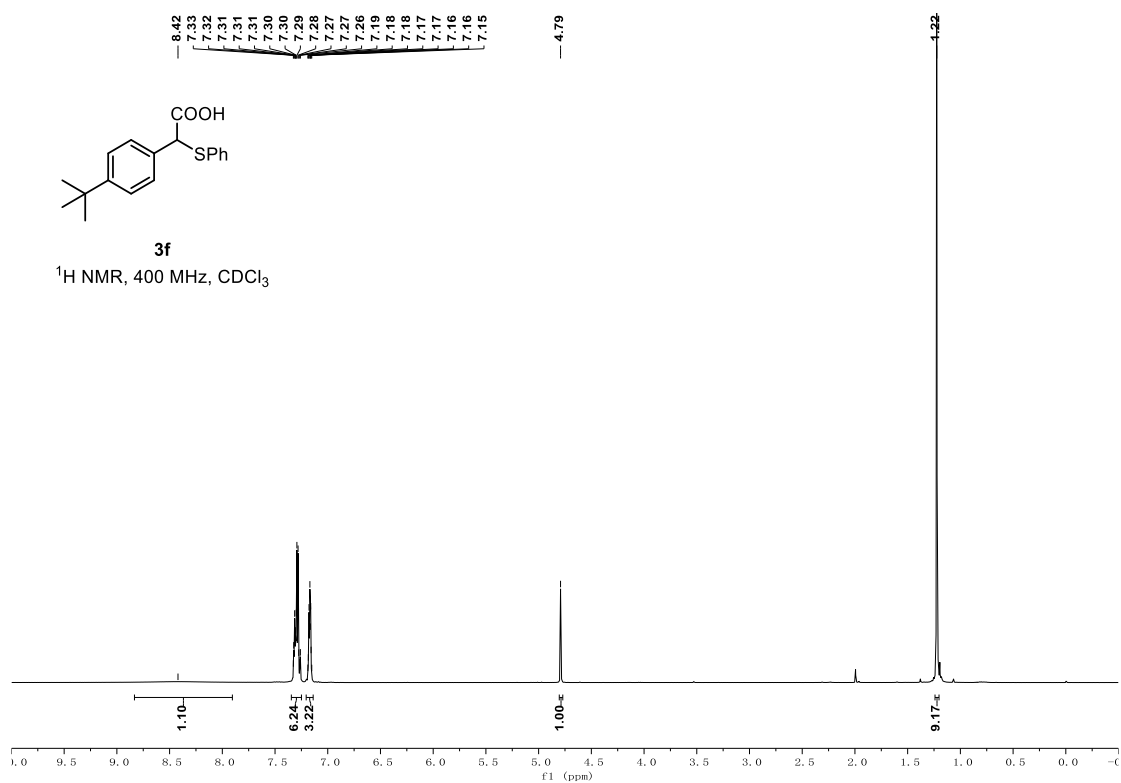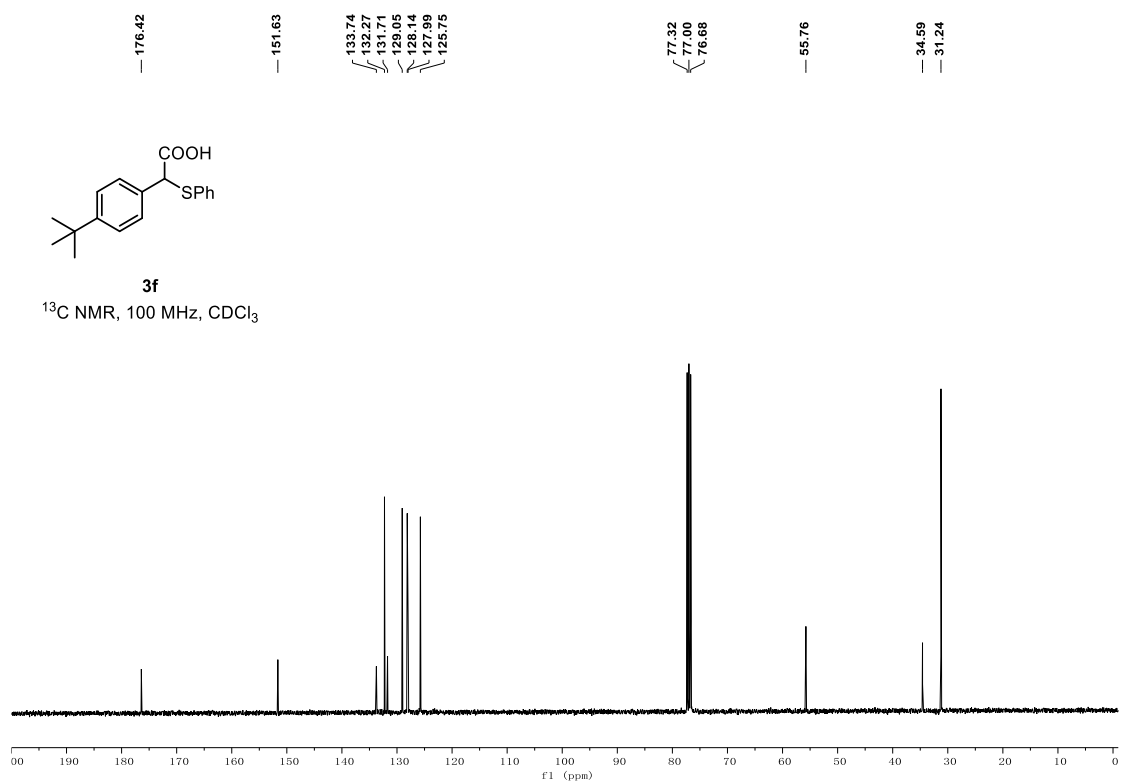

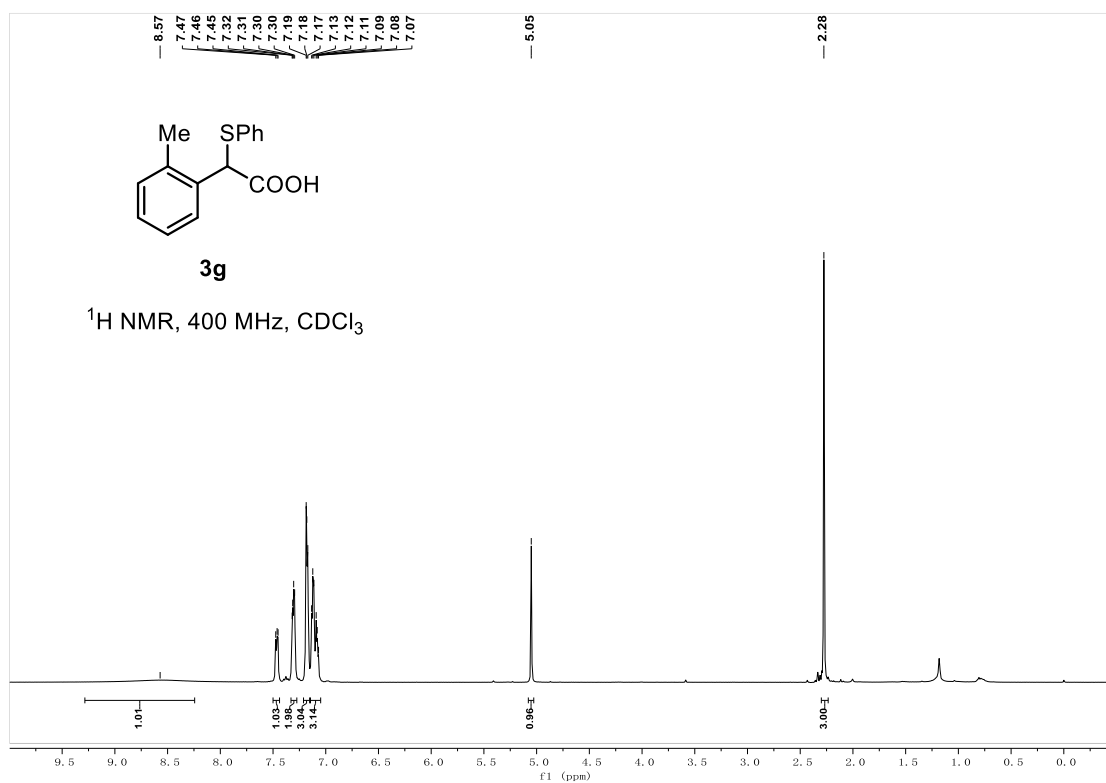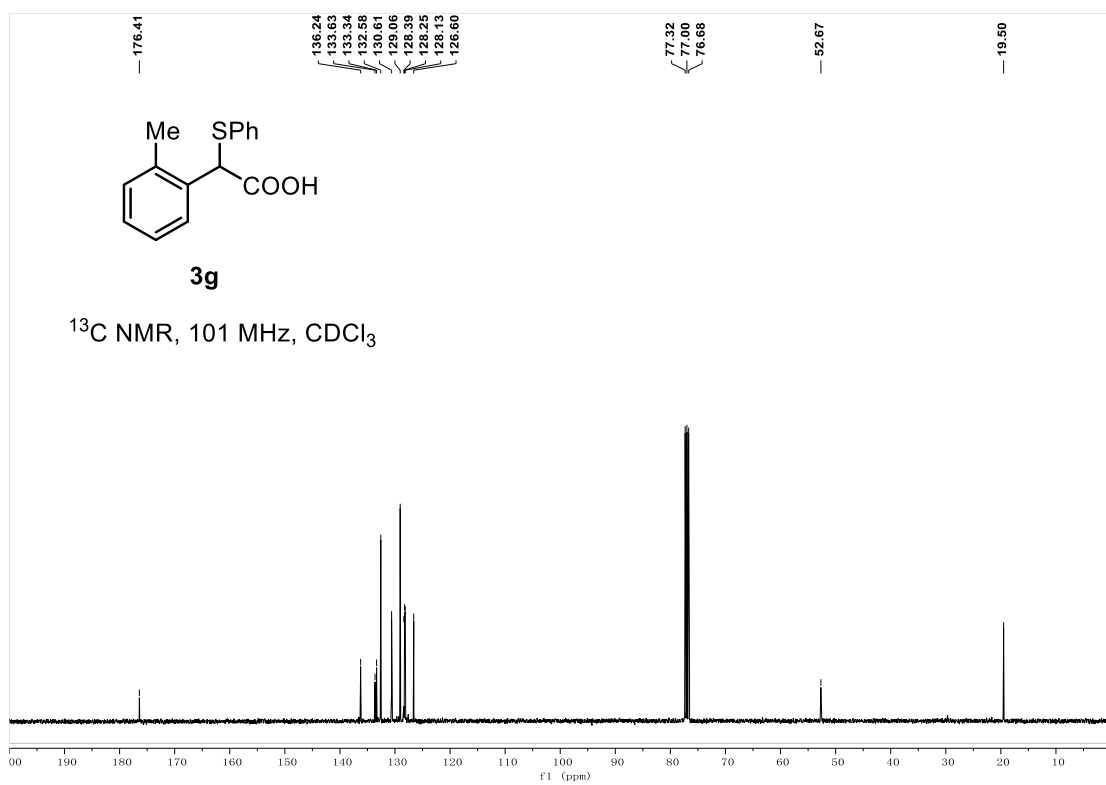

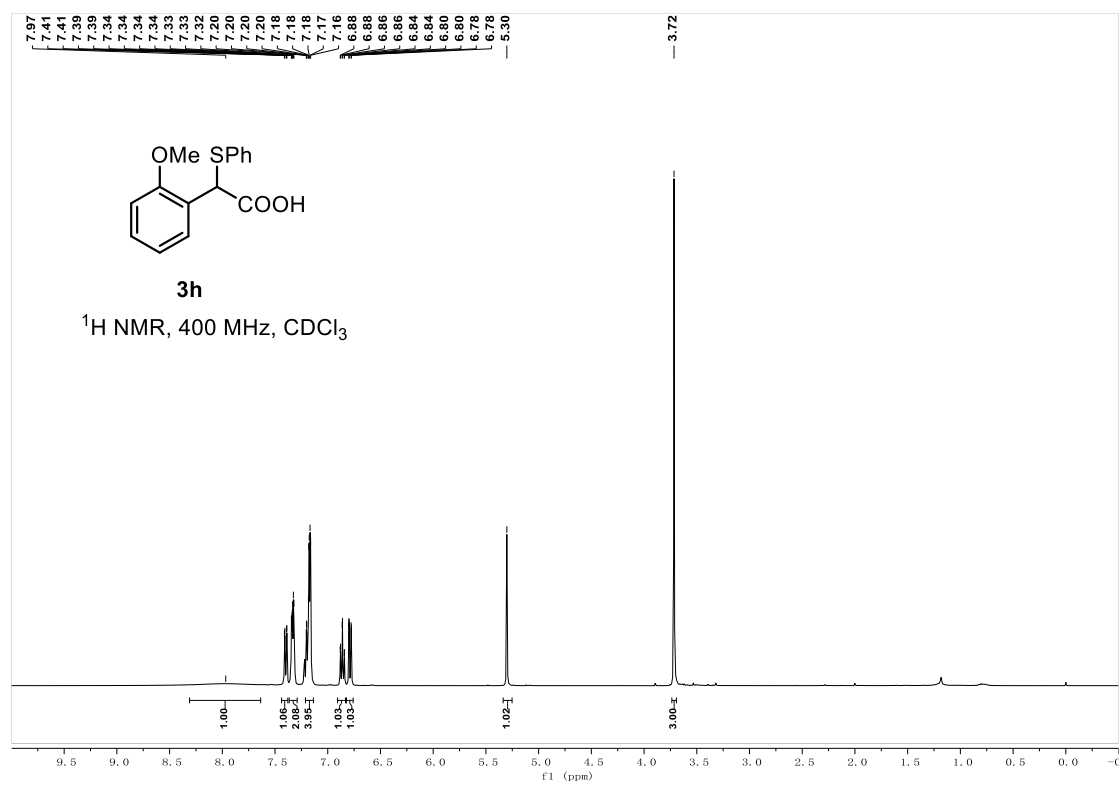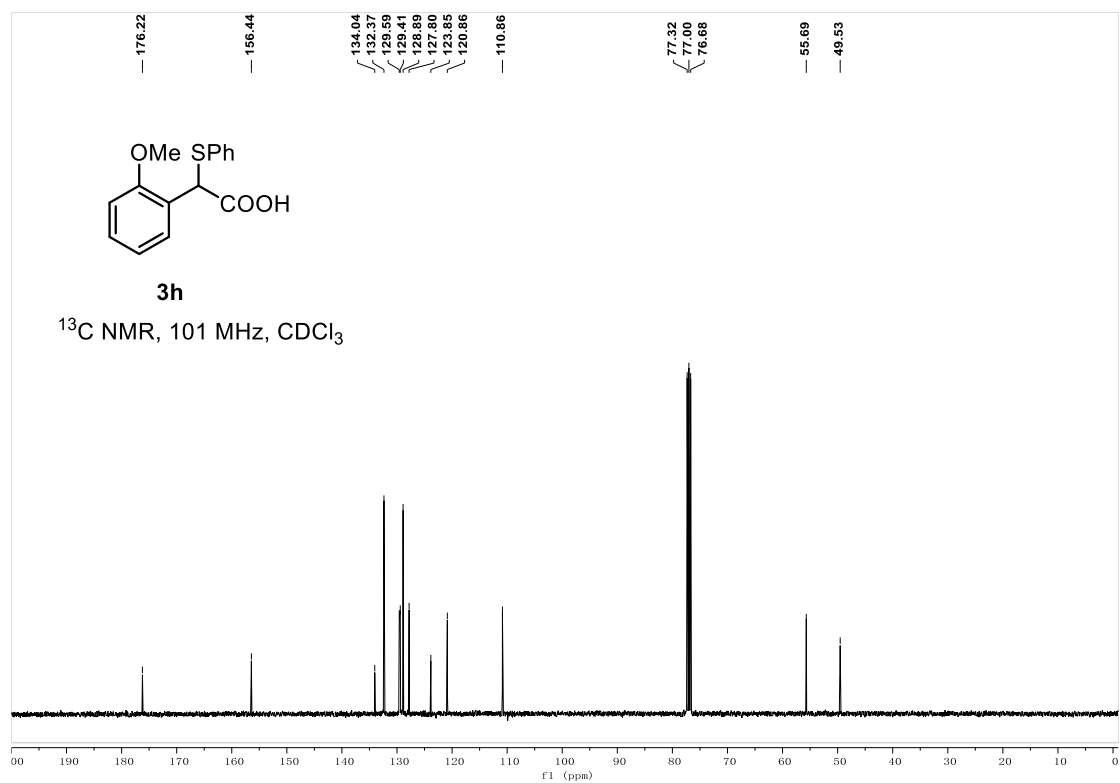

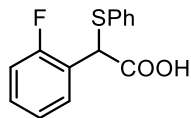

**3i**

<sup>1</sup>H NMR, 300 MHz, CDCl<sub>3</sub>

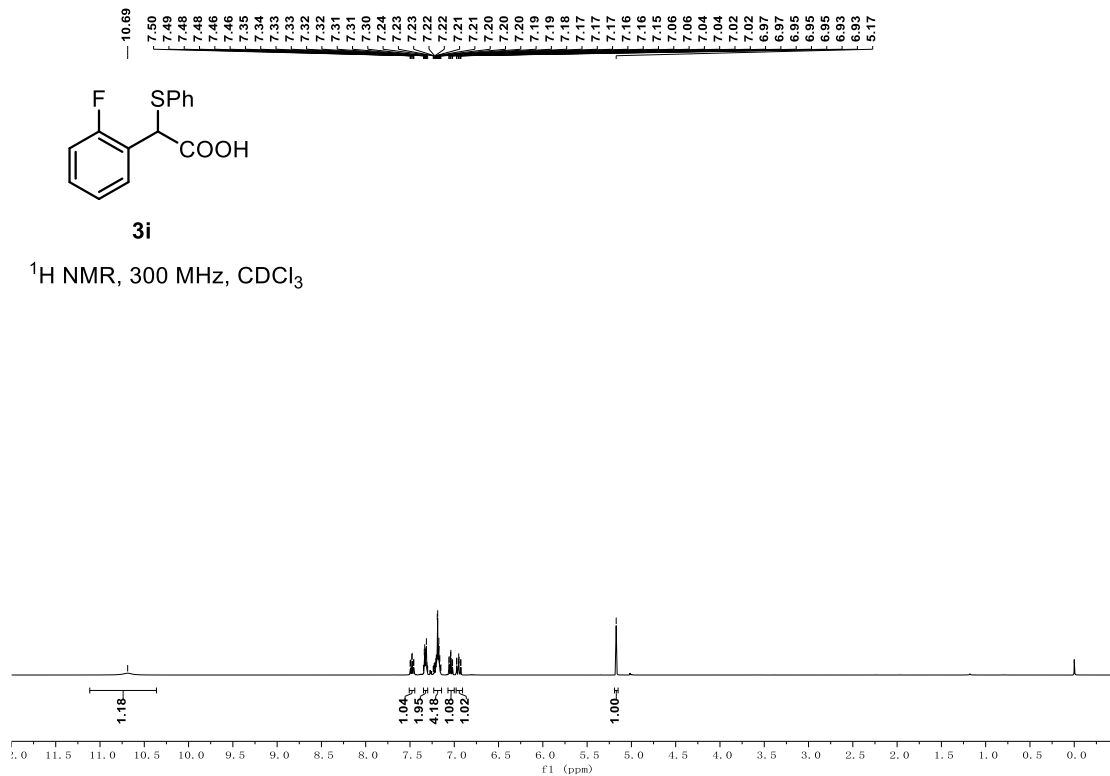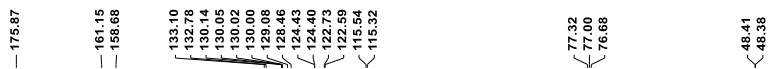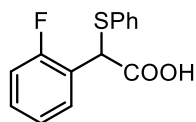

**3i**

<sup>13</sup>C NMR, 75 MHz, CDCl<sub>3</sub>

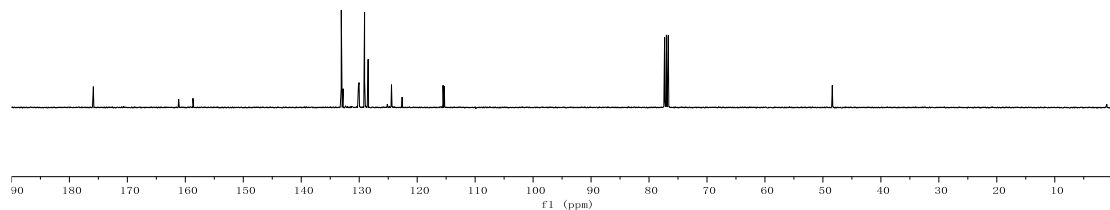

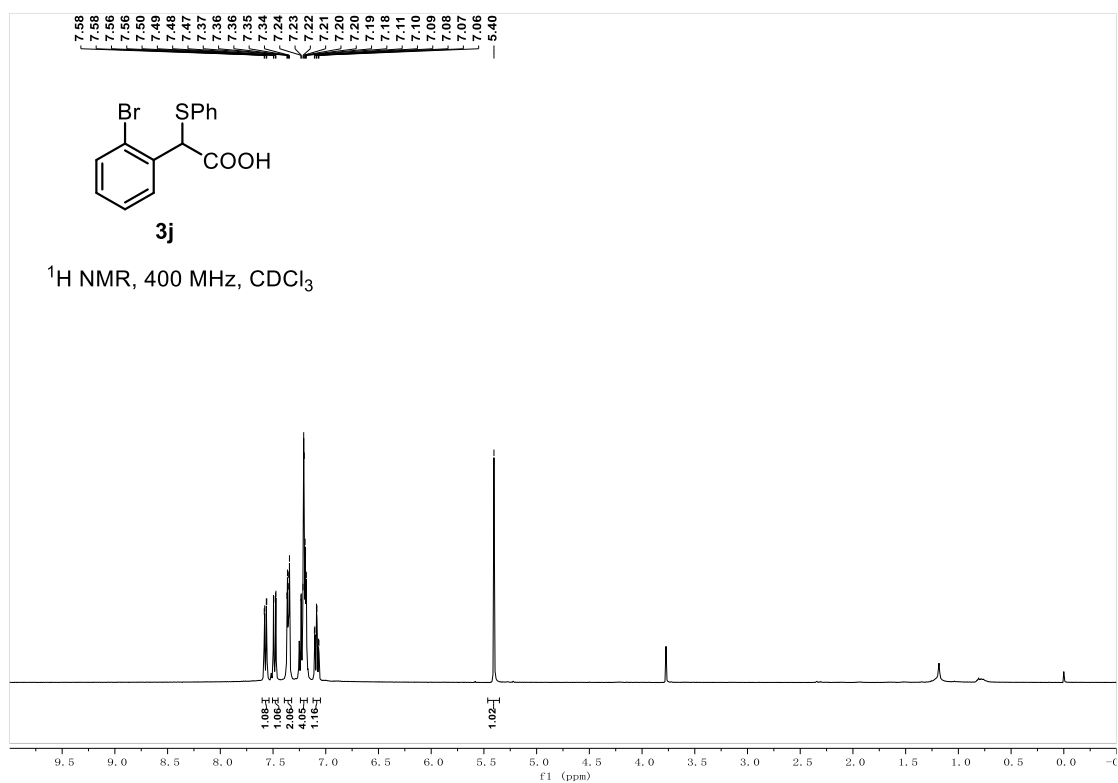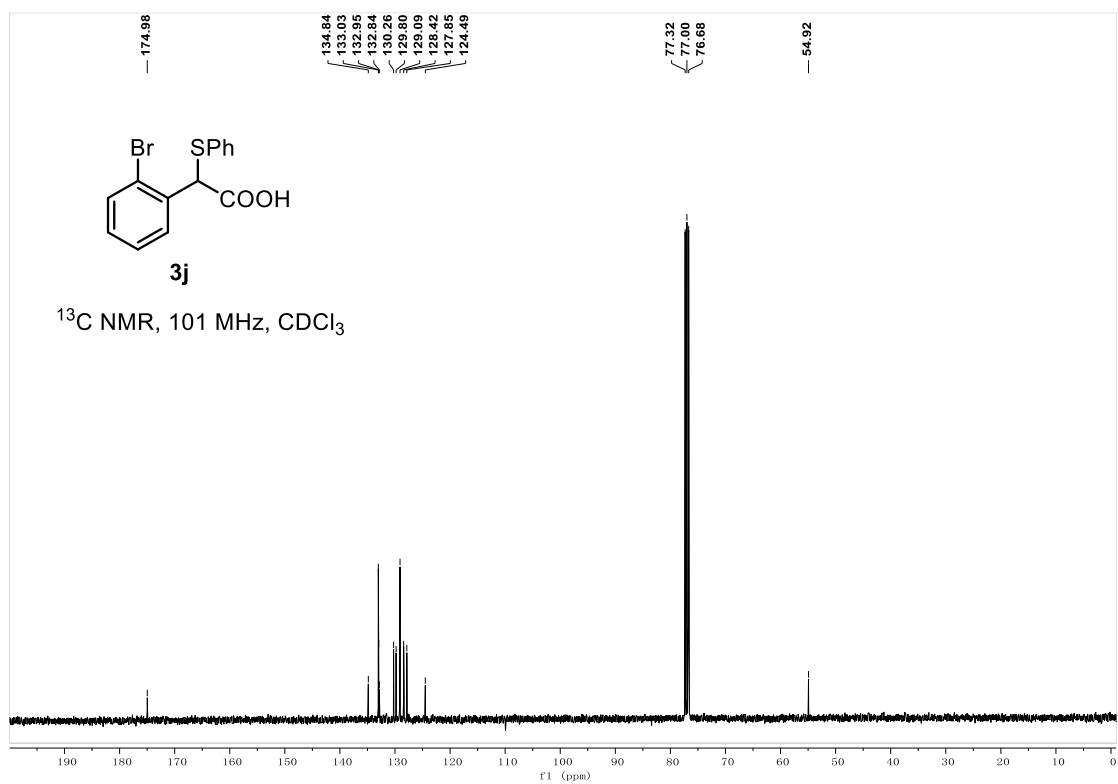



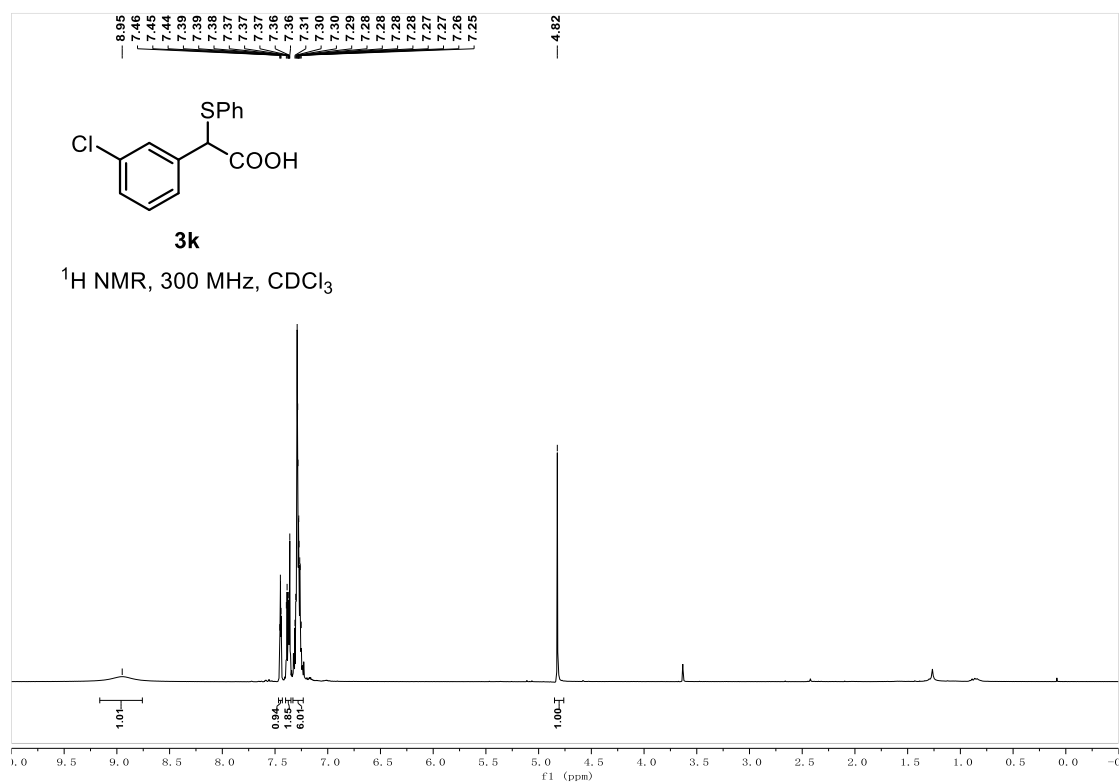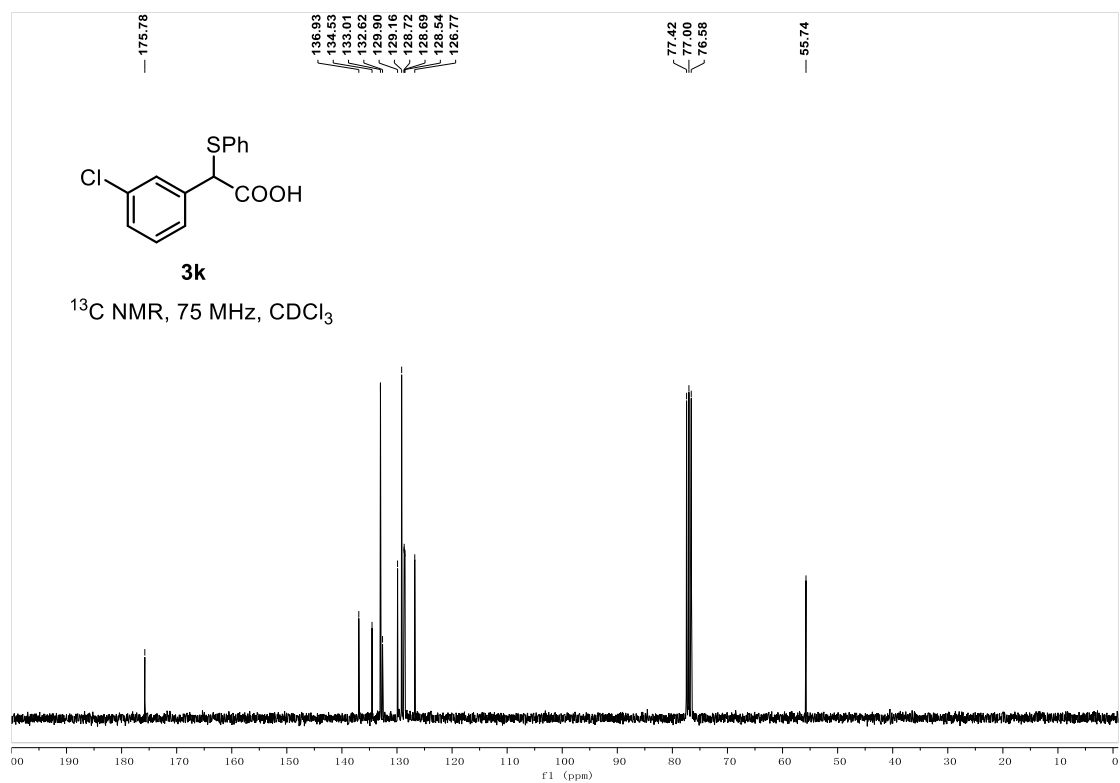

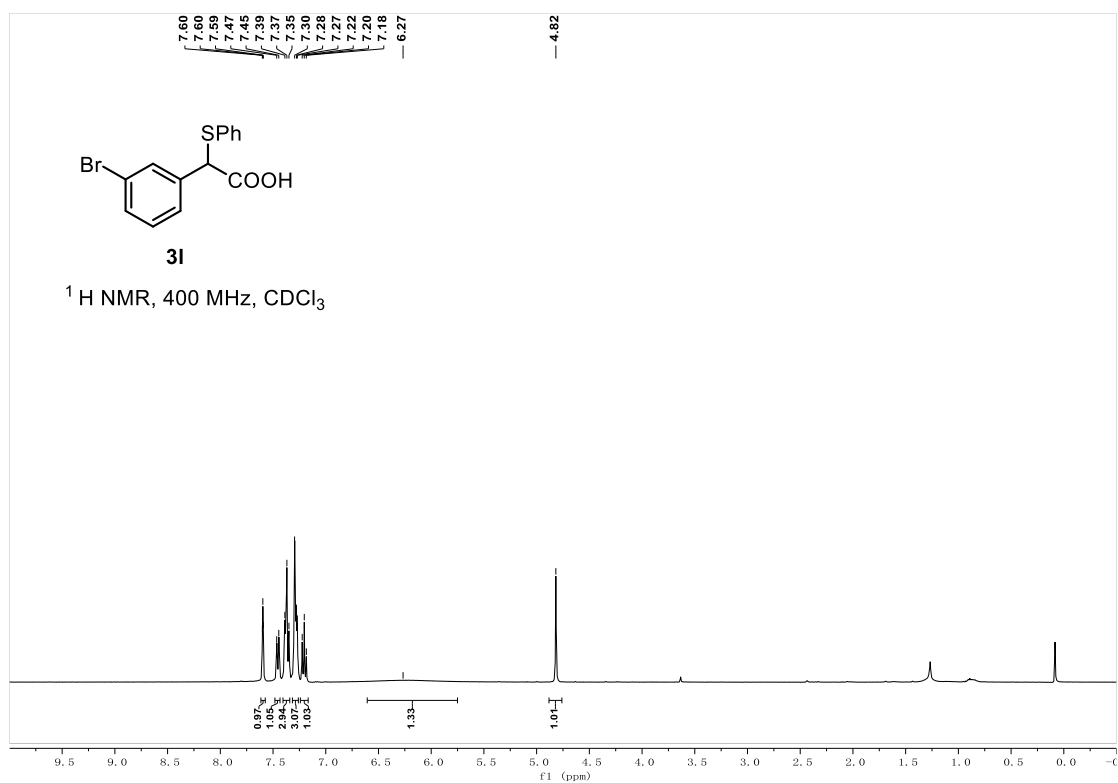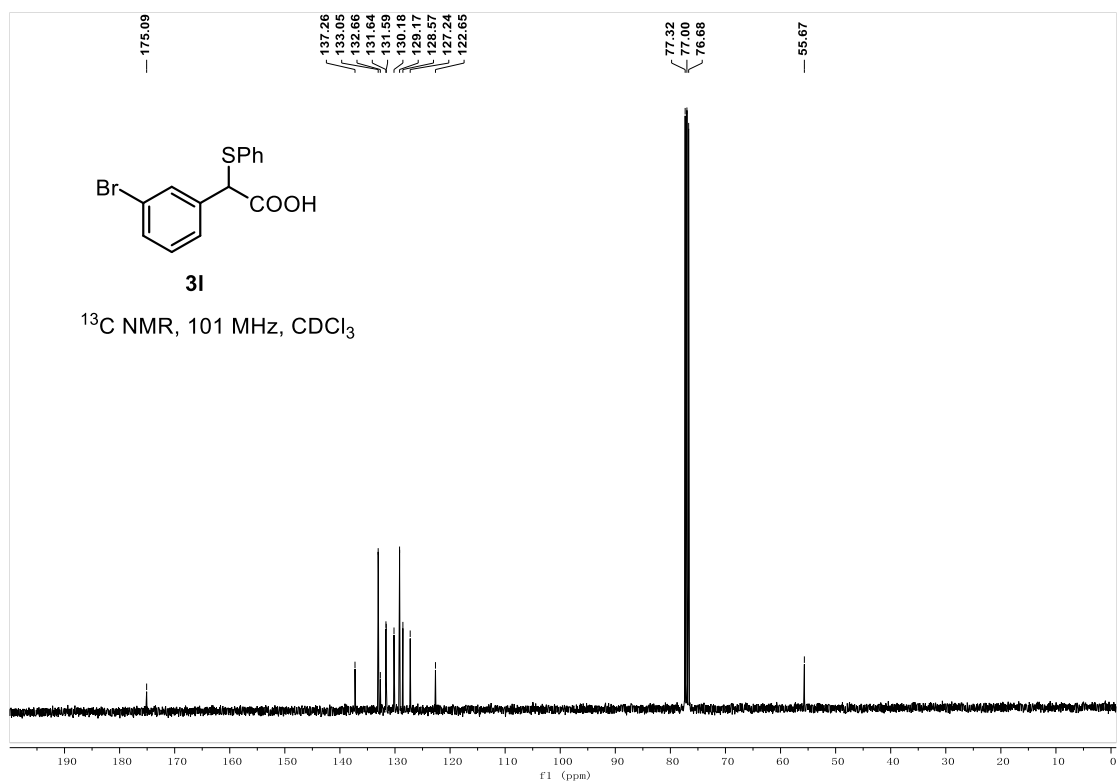

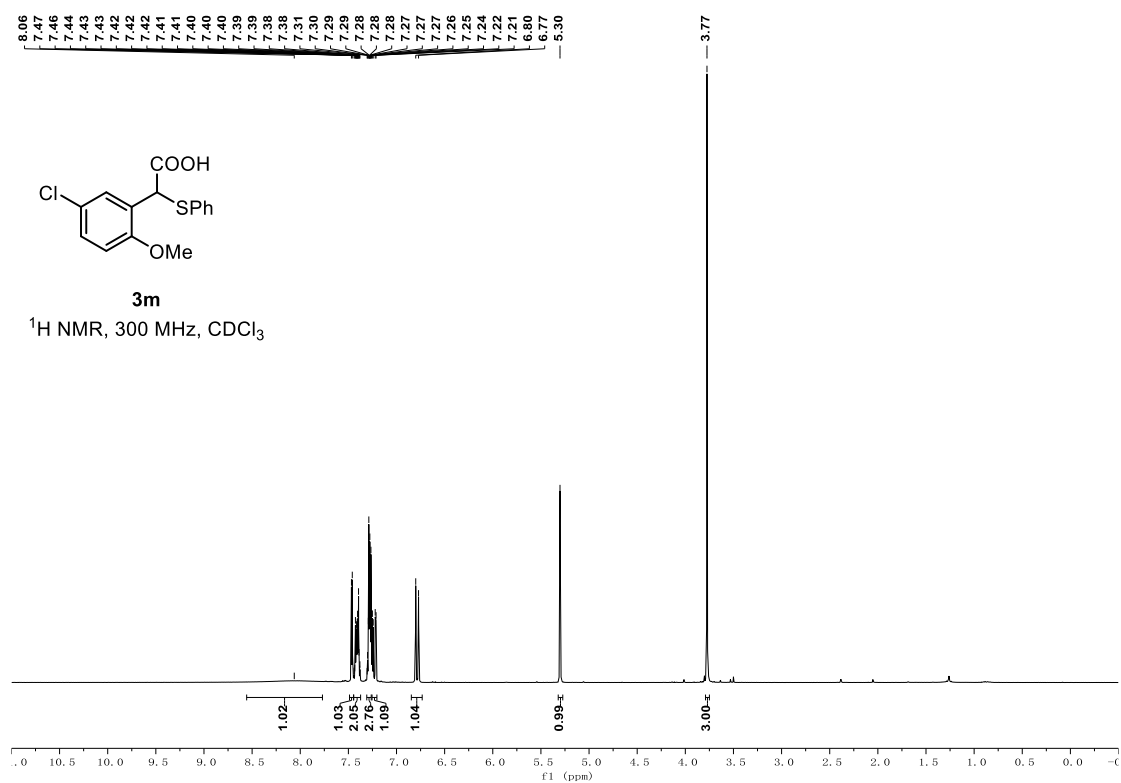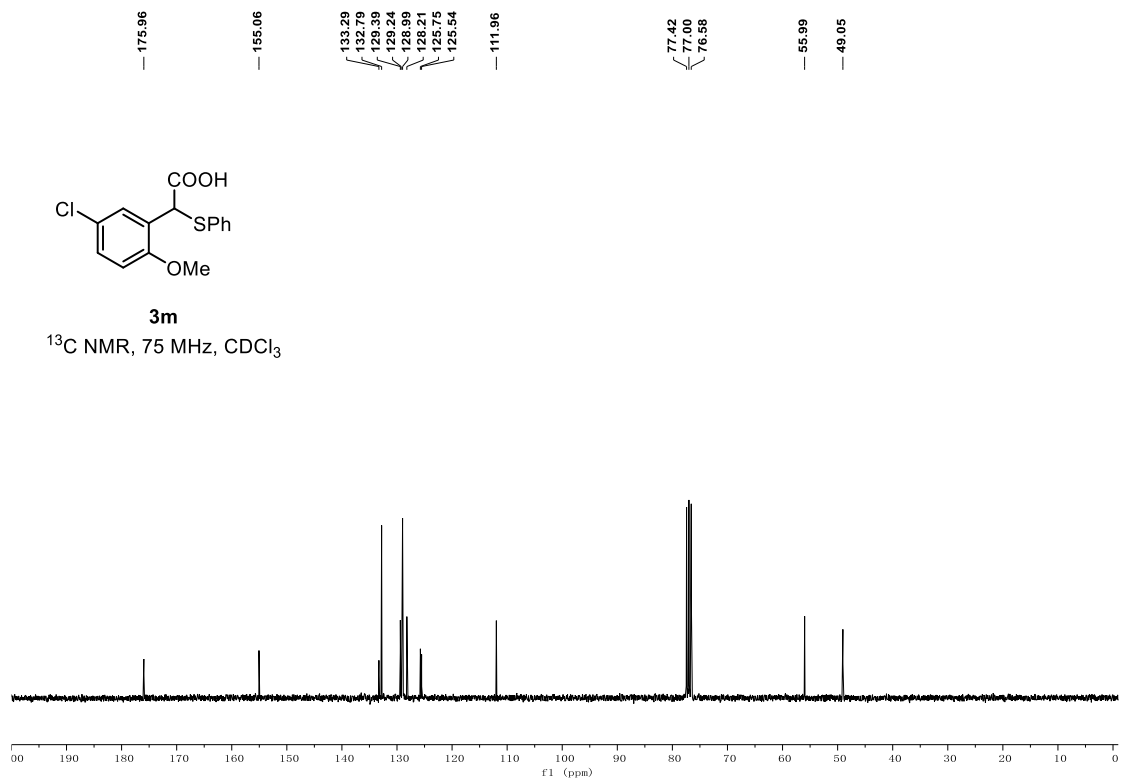

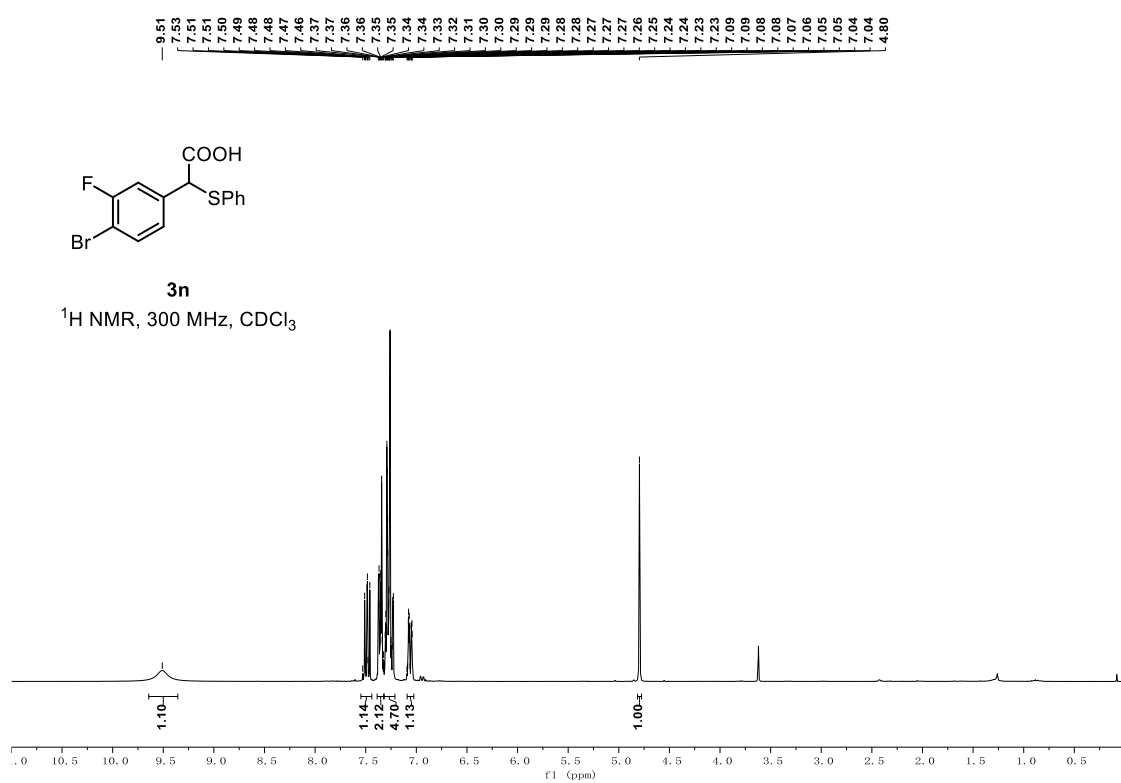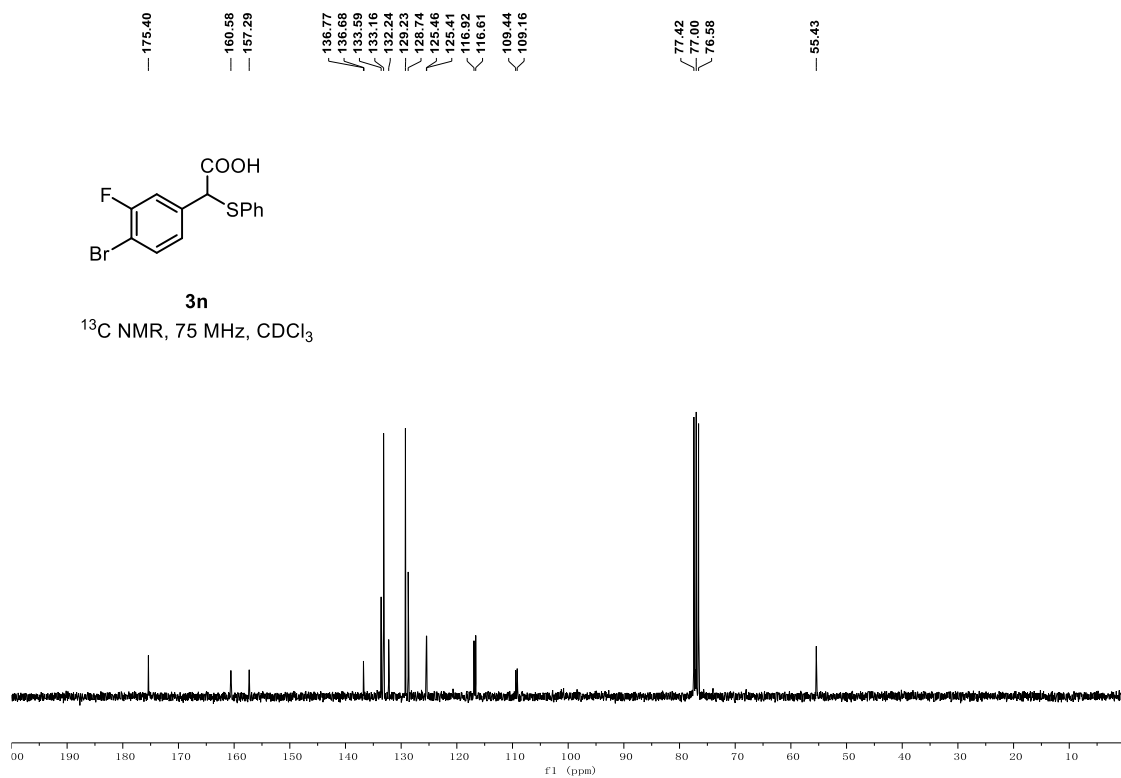

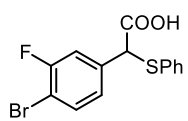

**3n**

$^{19}\text{F}$  NMR, 282 MHz,  $\text{CDCl}_3$

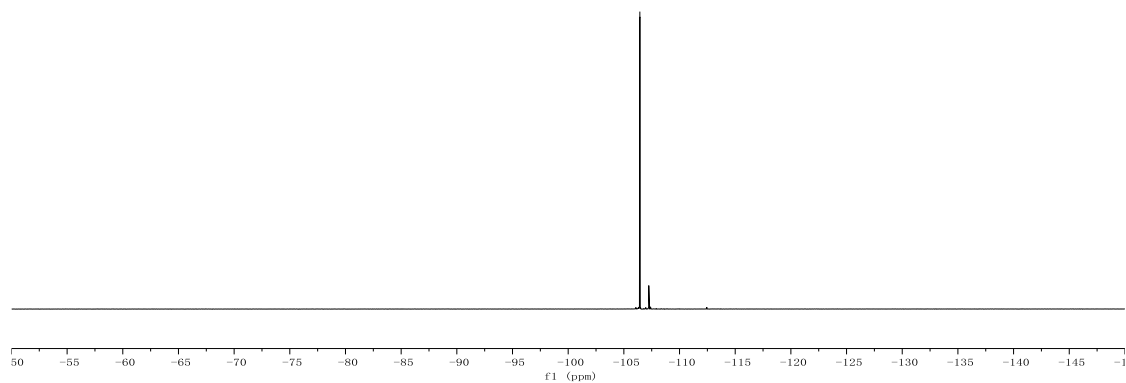

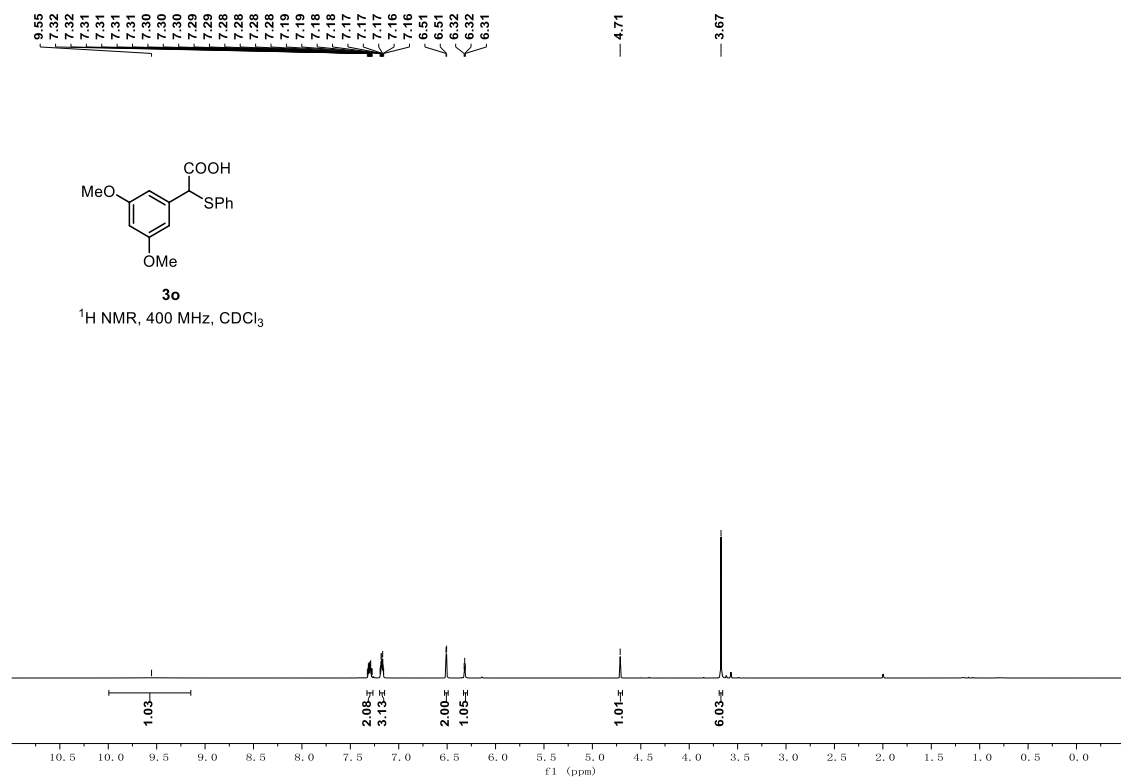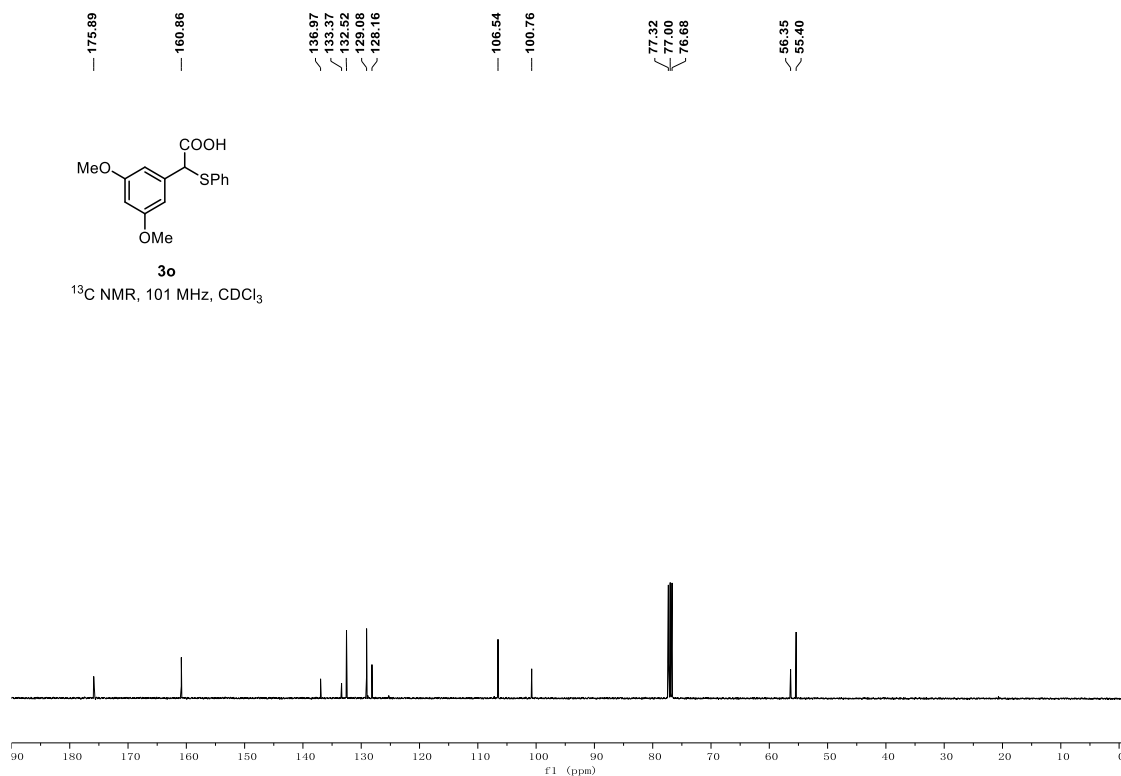

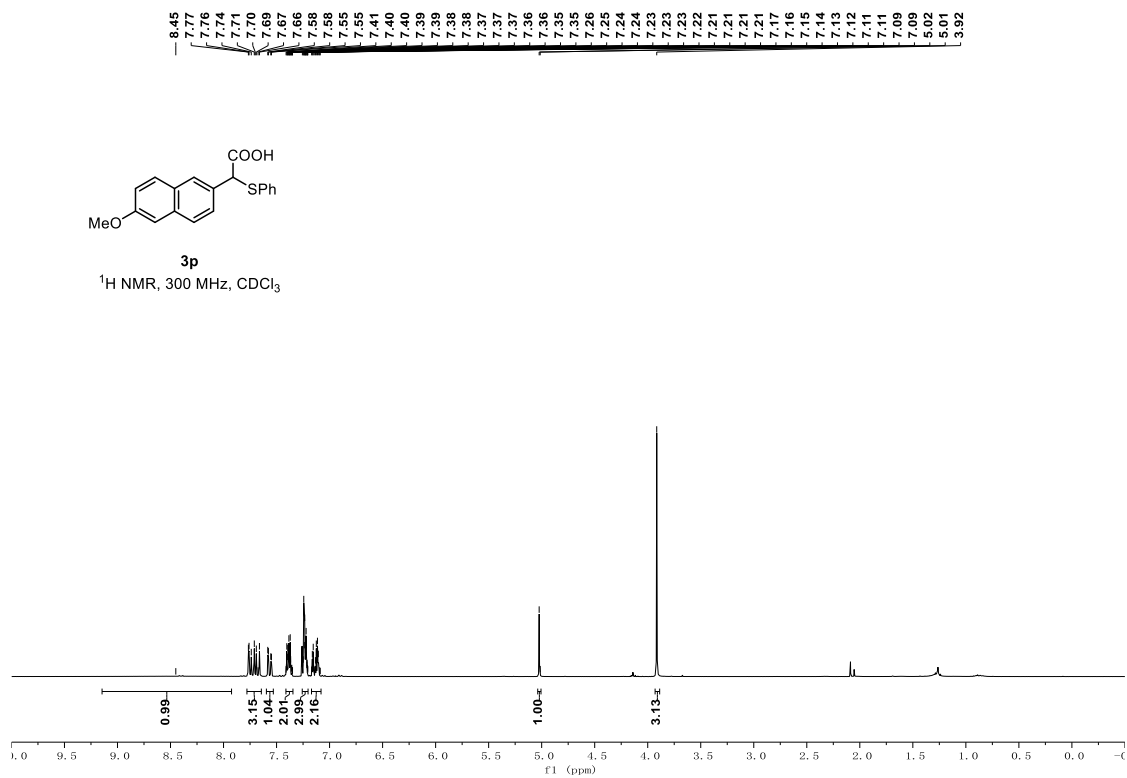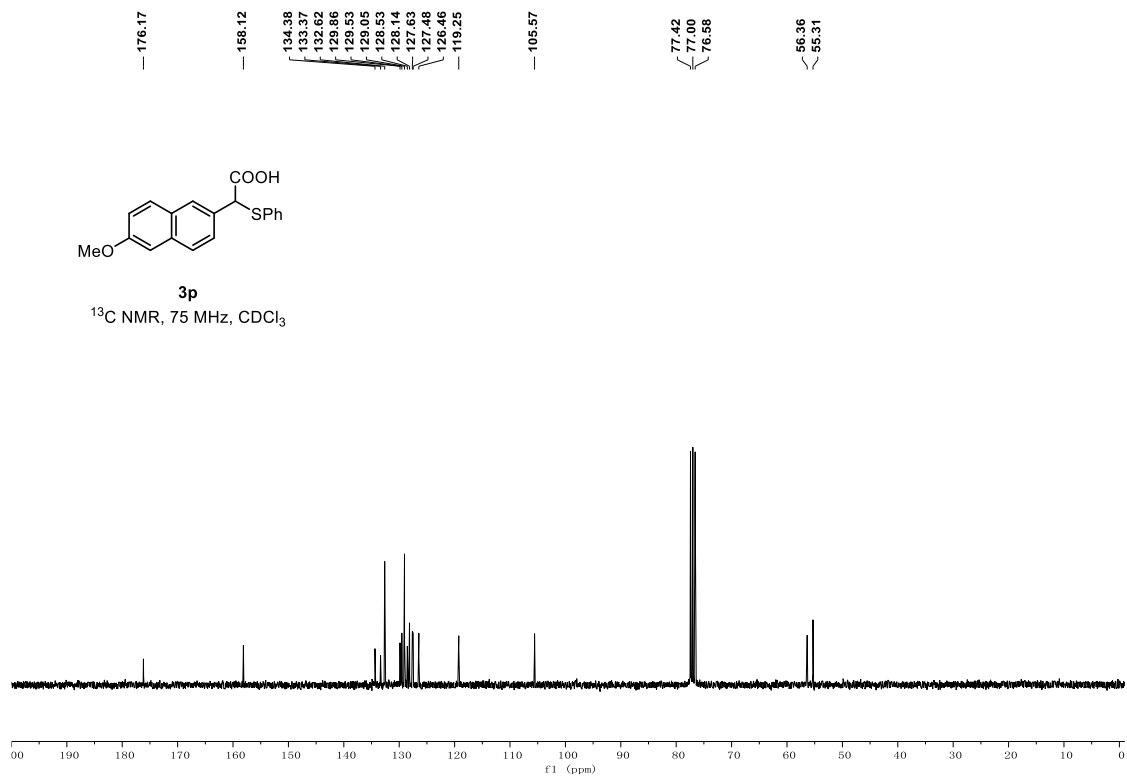

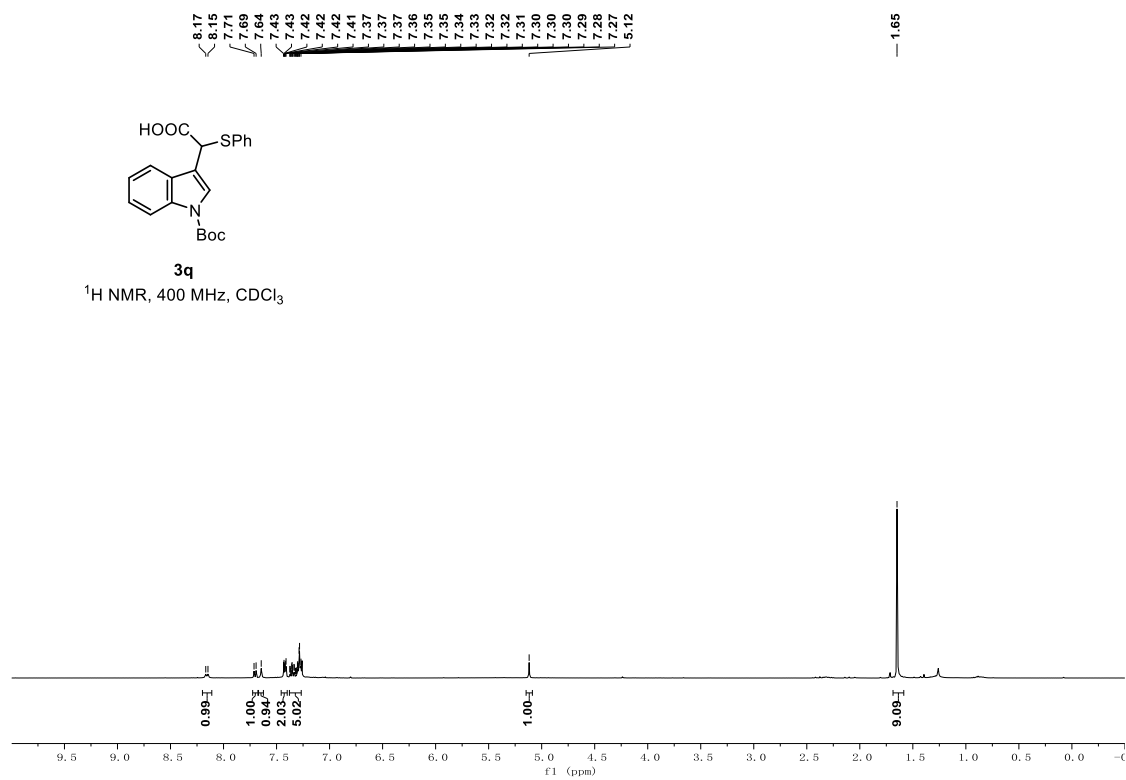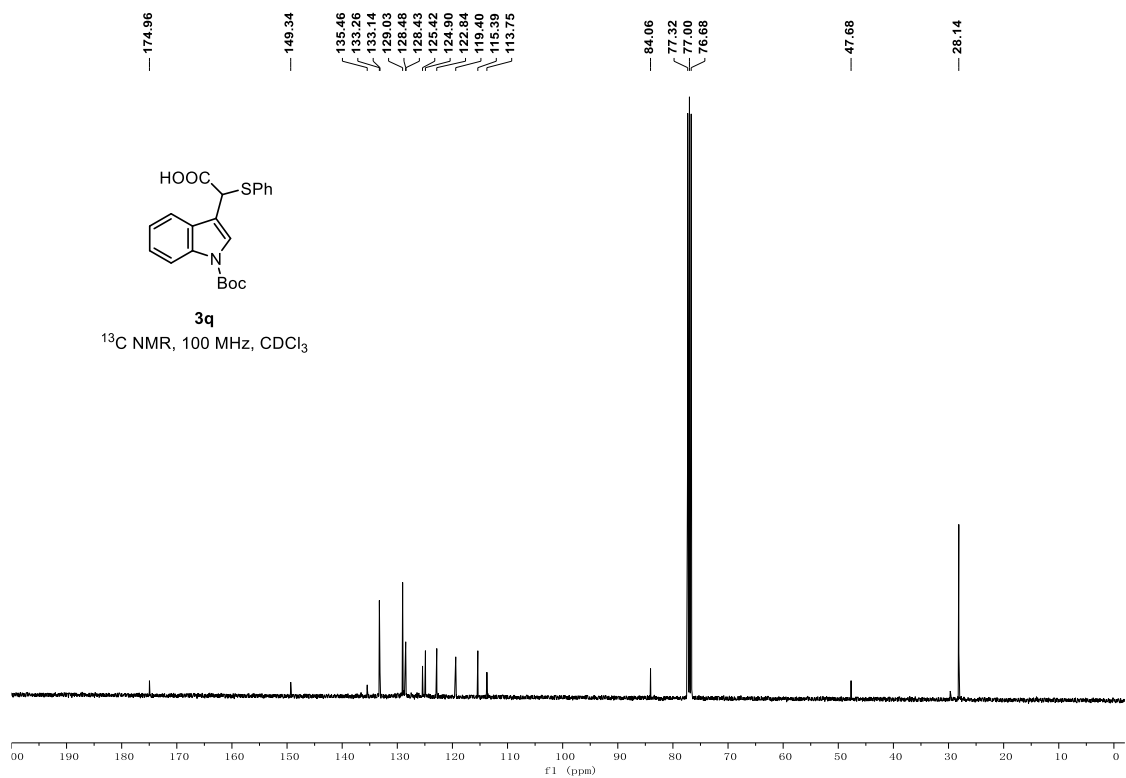



7.56  
7.55  
7.55  
7.55  
7.54  
7.53  
7.52  
7.51  
7.39  
7.38  
7.38  
7.37  
7.36  
7.36  
7.35  
7.35  
7.34  
7.34  
7.33  
7.33  
7.32  
7.31  
7.31  
7.30  
7.30  
7.29  
7.29  
7.28  
7.28  
7.27  
7.27  
7.25  
7.24  
7.24  
7.23  
7.22  
7.21  
7.21

— 1.82

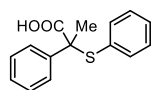

**3r**

<sup>1</sup>H NMR, 300 MHz, CDCl<sub>3</sub>

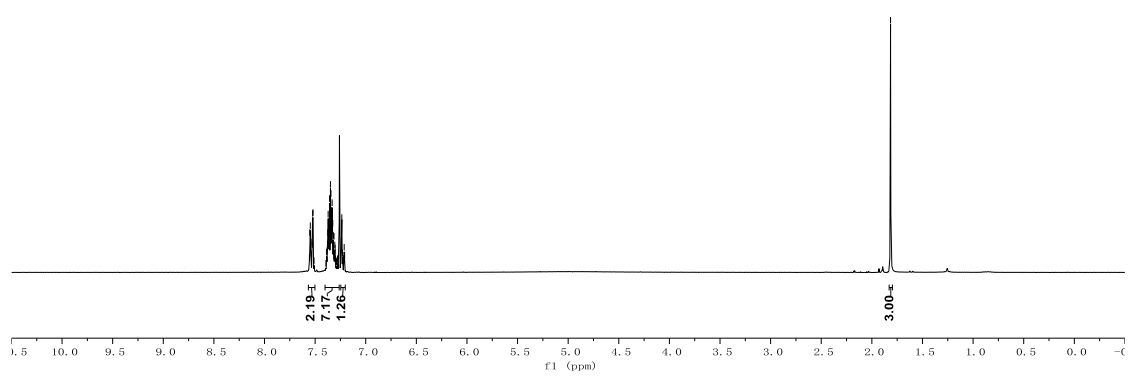

— 177.40

138.85  
136.89  
136.46  
135.45  
133.66  
128.36  
127.92  
127.10

77.42  
77.00  
76.58

— 59.57

— 25.20

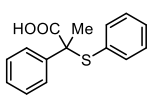

**3r**

<sup>13</sup>C NMR, 75 MHz, CDCl<sub>3</sub>

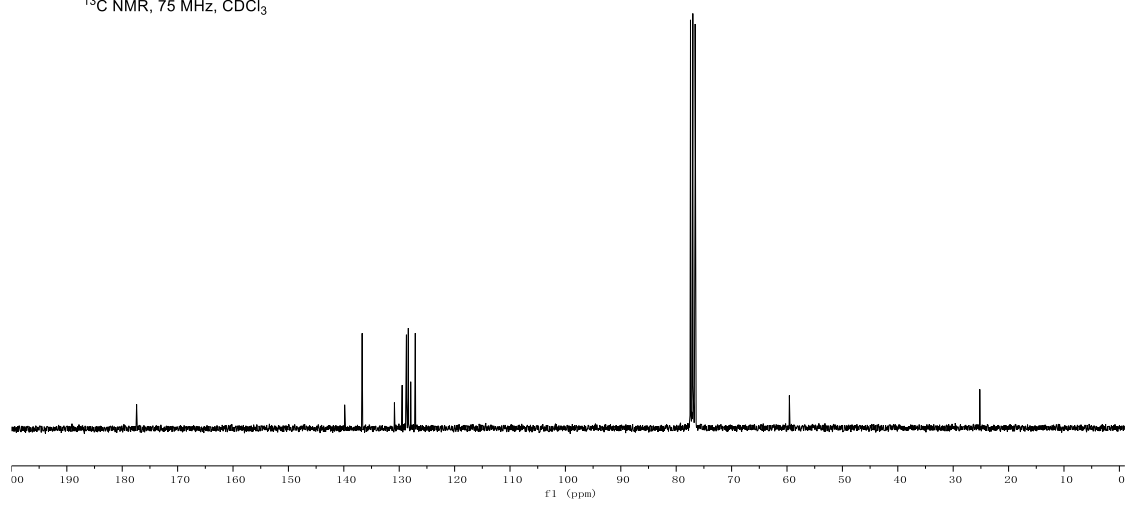

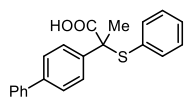

**3s**

<sup>1</sup>H NMR, 300 MHz, CDCl<sub>3</sub>

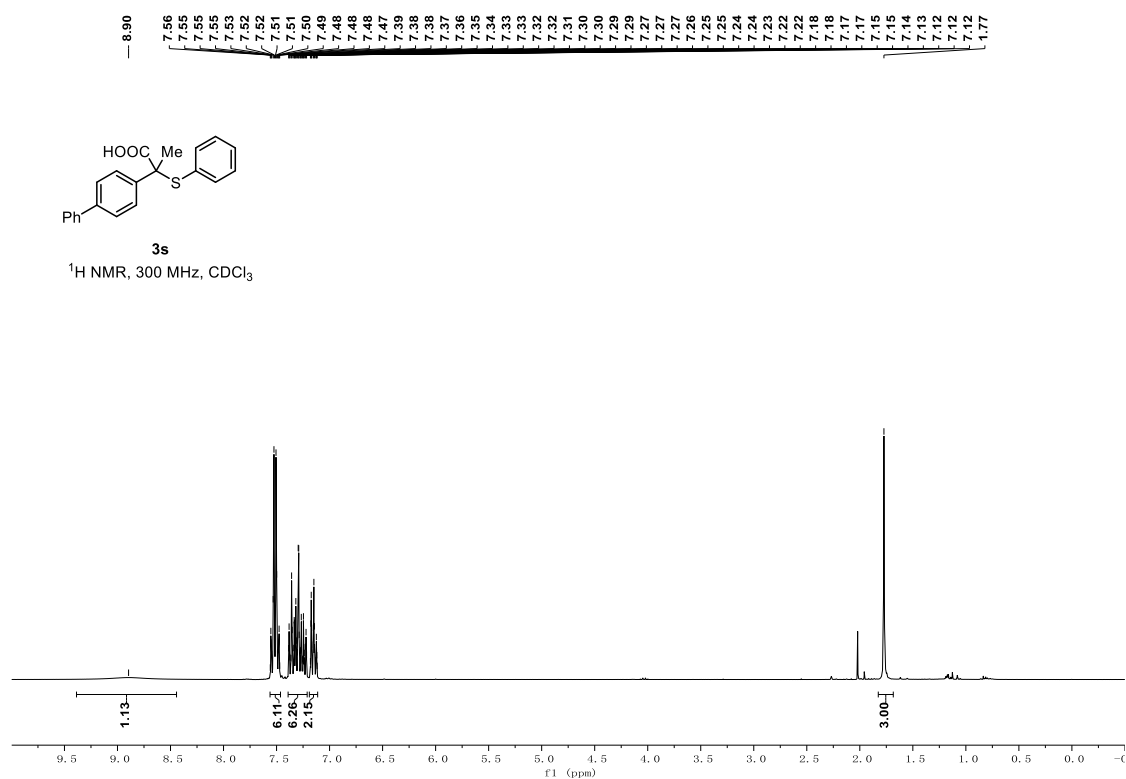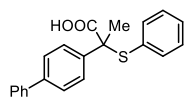

**3s**

<sup>13</sup>C NMR, 75 MHz, CDCl<sub>3</sub>

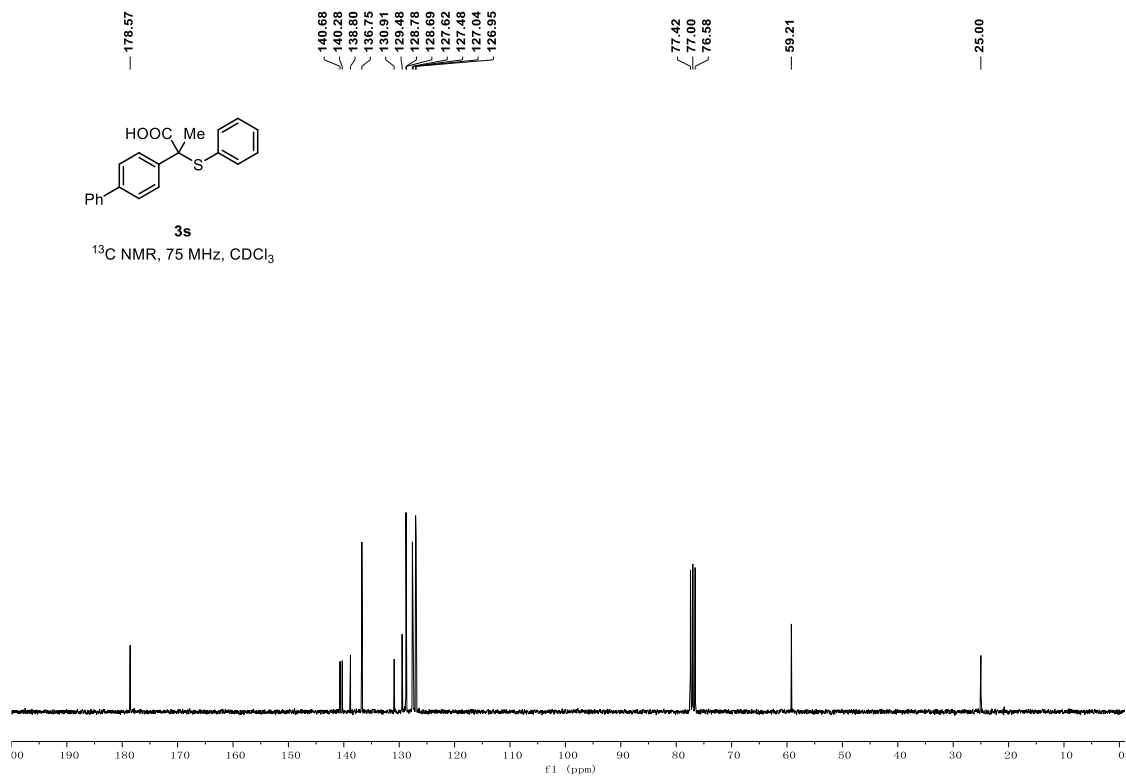

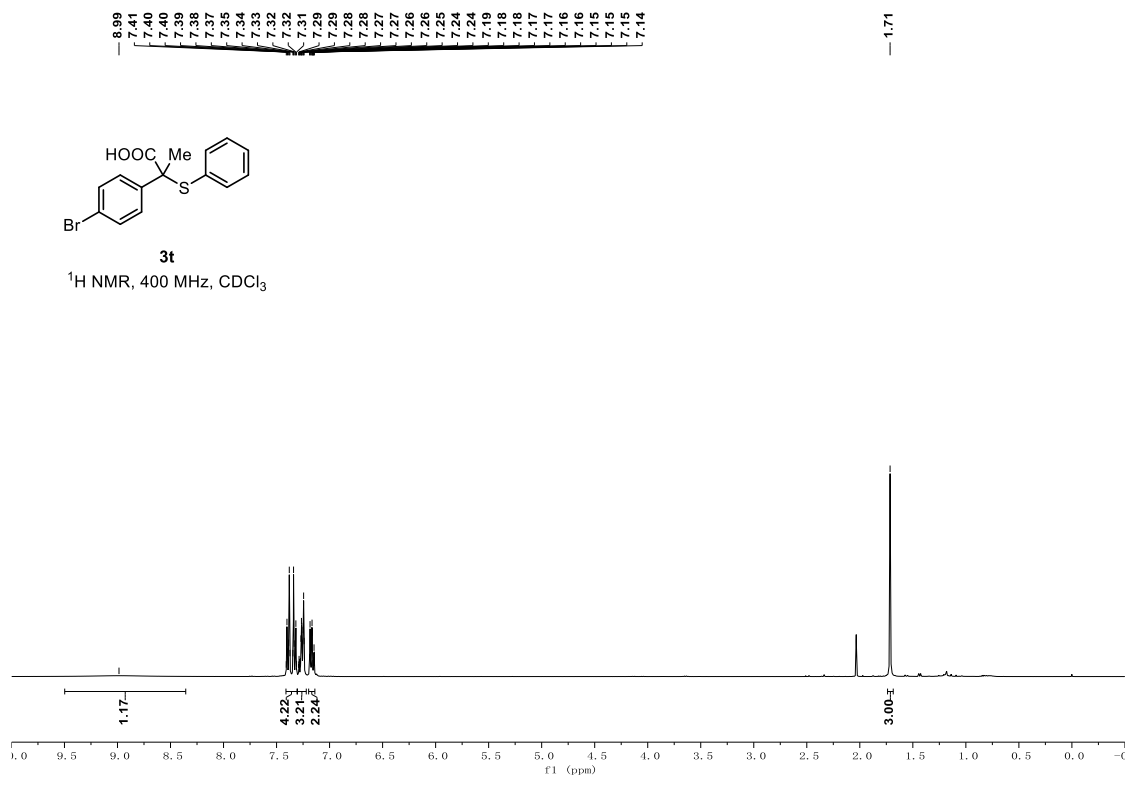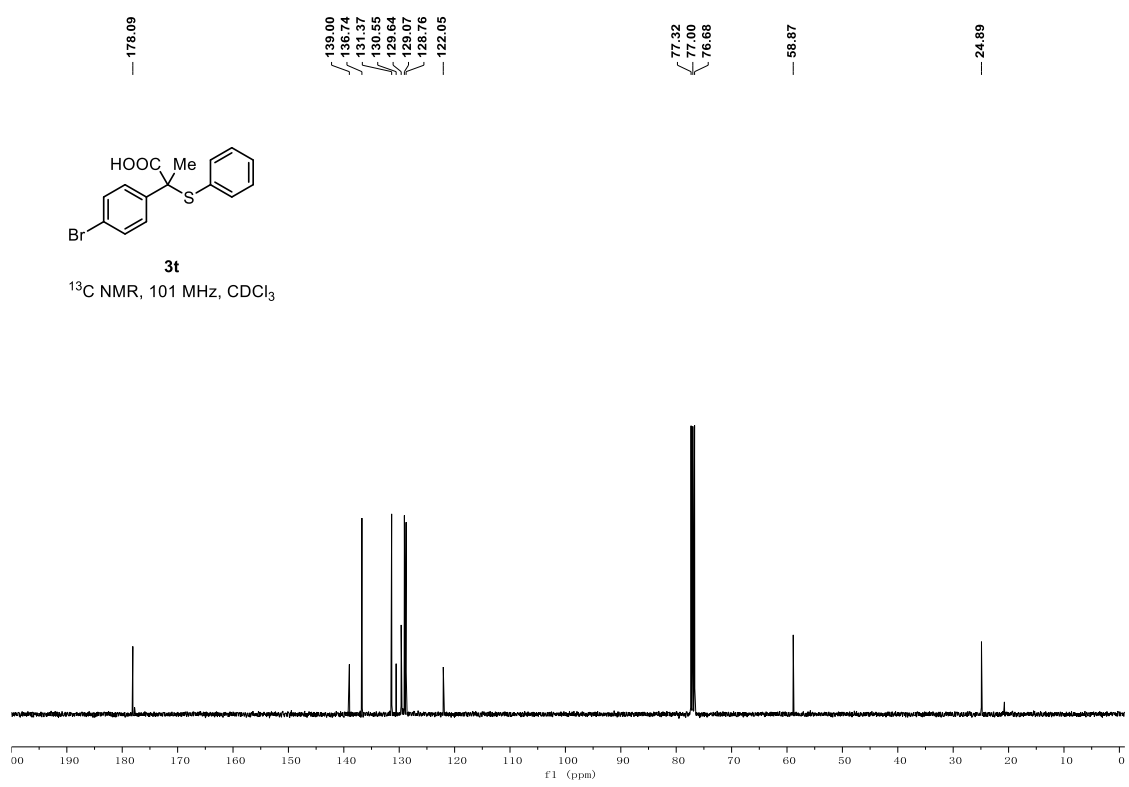

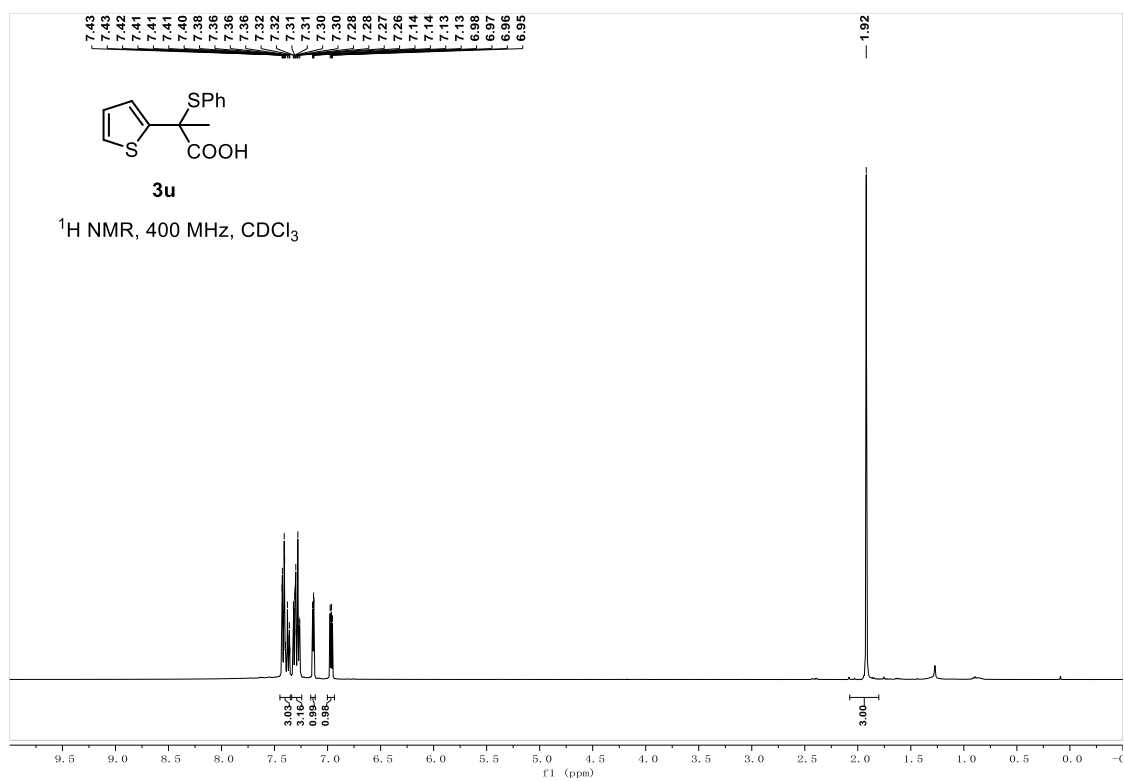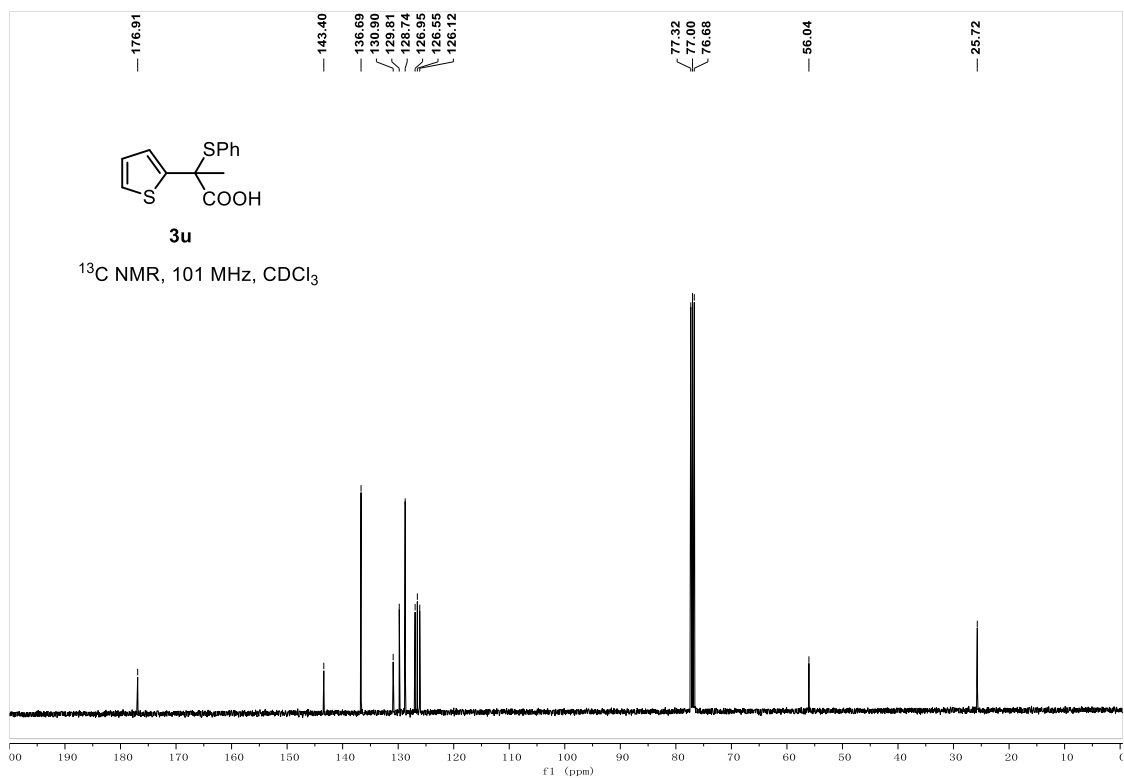

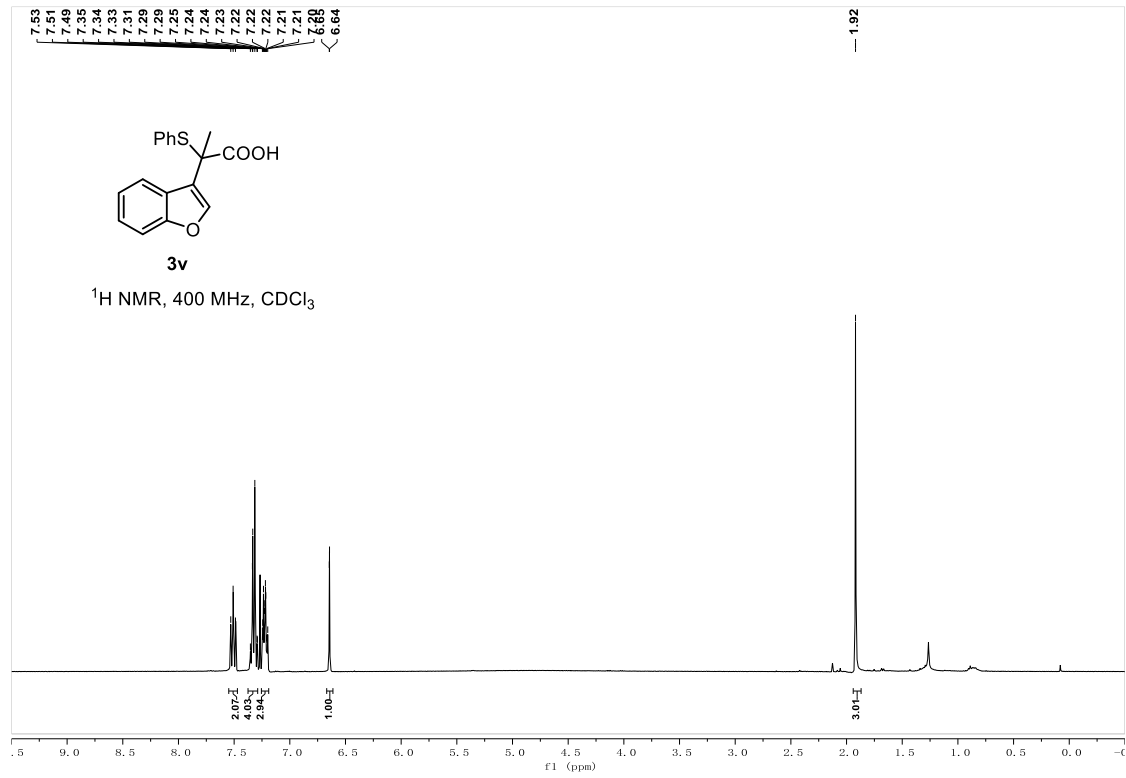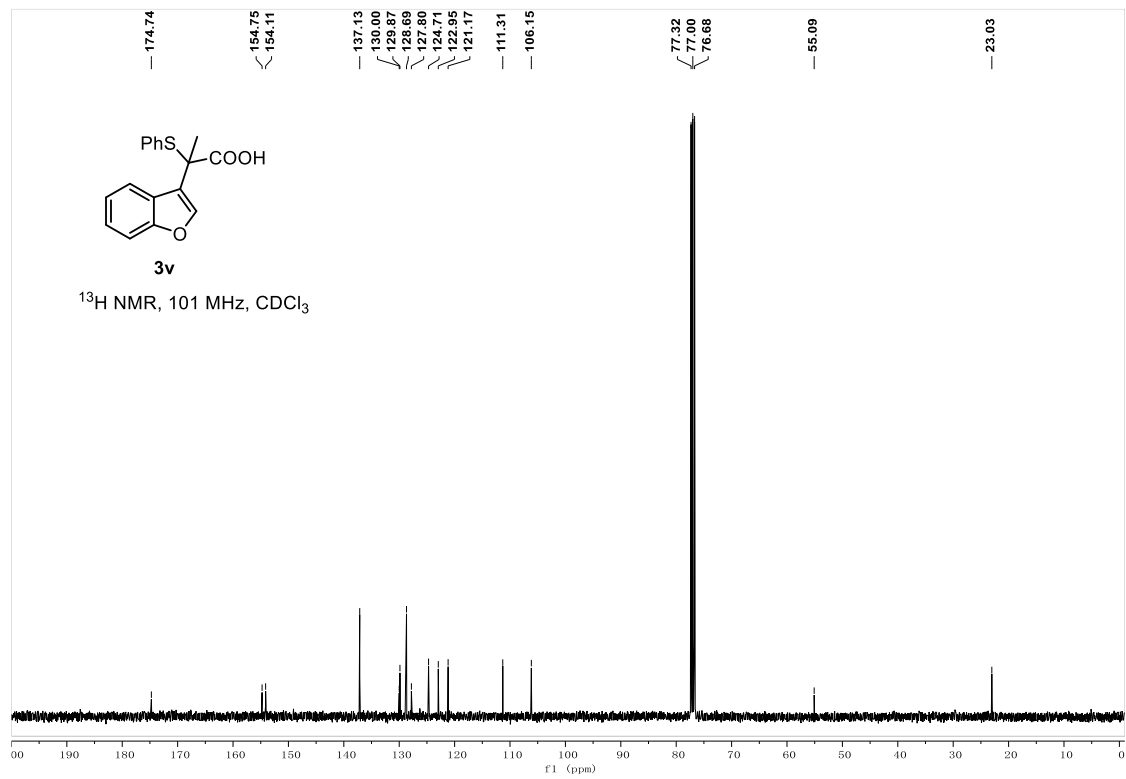

7.32  
7.31  
7.31  
7.30  
7.29  
7.29  
7.27  
7.26  
7.26  
7.25  
7.25  
7.25  
7.24  
7.24  
7.24  
7.23  
7.22  
7.22  
7.21  
7.21  
7.21  
7.20  
7.20  
7.20  
7.19  
7.19  
7.18  
7.17  
7.17  
7.16  
7.16  
7.13  
7.12  
7.11  
7.10  
7.10  
7.09  
7.09  
7.08  
7.08  
7.07  
7.07  
7.06  
7.05  
7.05  
7.04  
7.03  
7.03  
7.02  
7.02  
7.01  
7.01  
6.85  
6.84  
6.84  
6.84  
6.83  
6.82  
6.82  
3.50  
3.50  
3.27

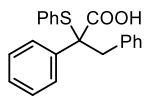

**3w**

<sup>1</sup>H NMR, 400 MHz, CDCl<sub>3</sub>

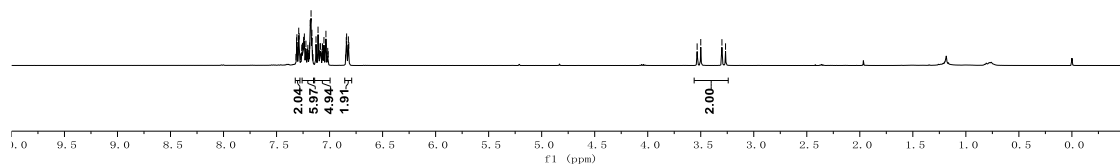

176.41  
137.97  
136.21  
135.65  
130.92  
130.90  
129.37  
128.72  
128.51  
127.85  
127.82  
126.76  
77.32  
77.00  
76.68  
65.49  
44.50

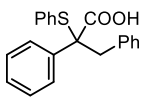

**3w**

<sup>13</sup>C NMR, 101 MHz, CDCl<sub>3</sub>

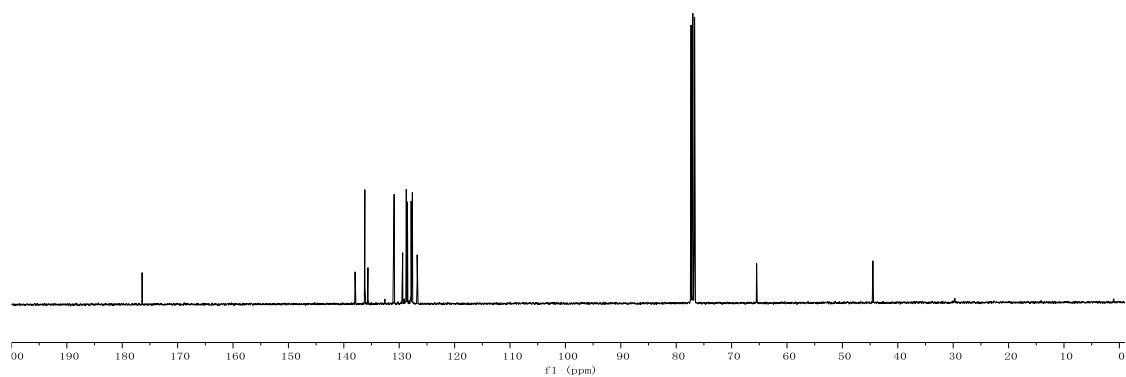

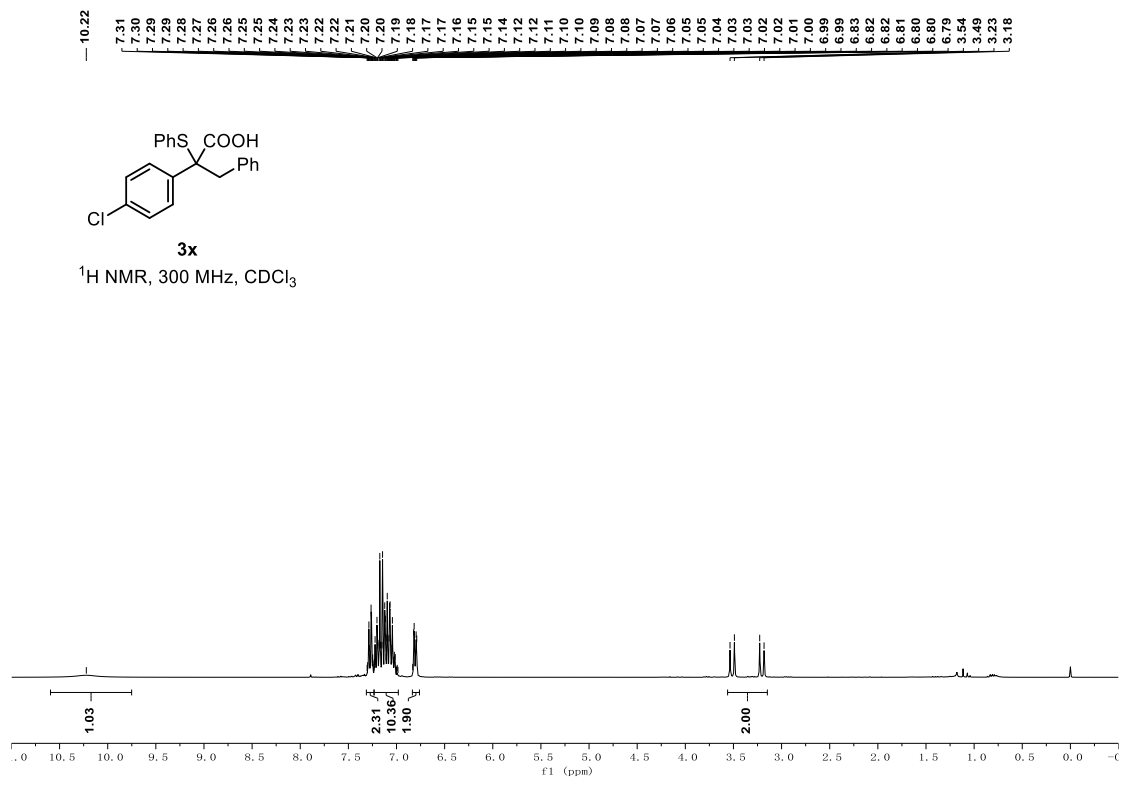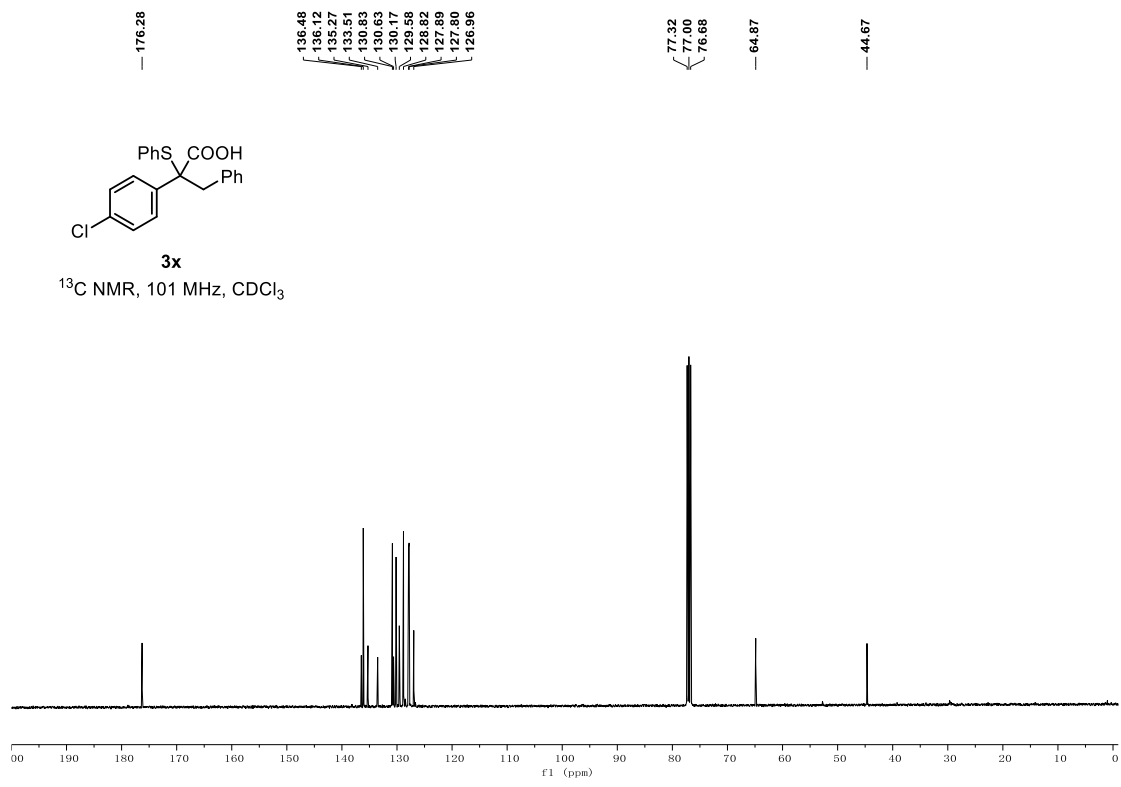

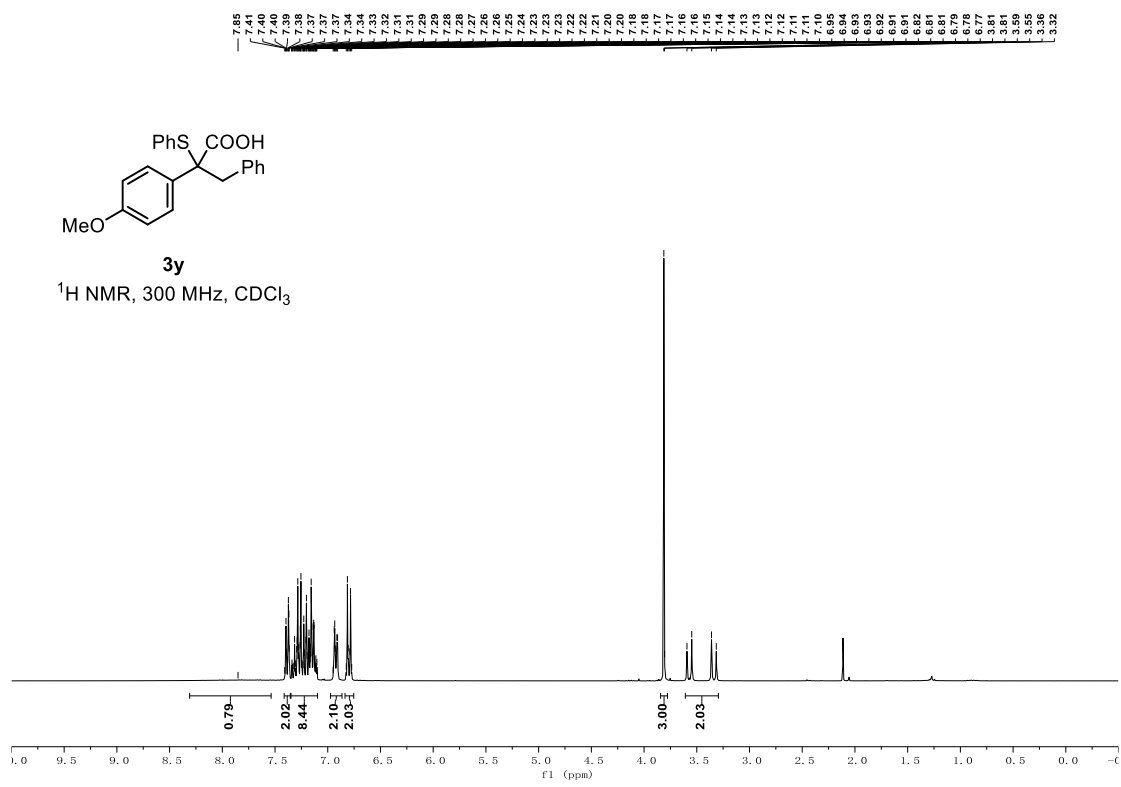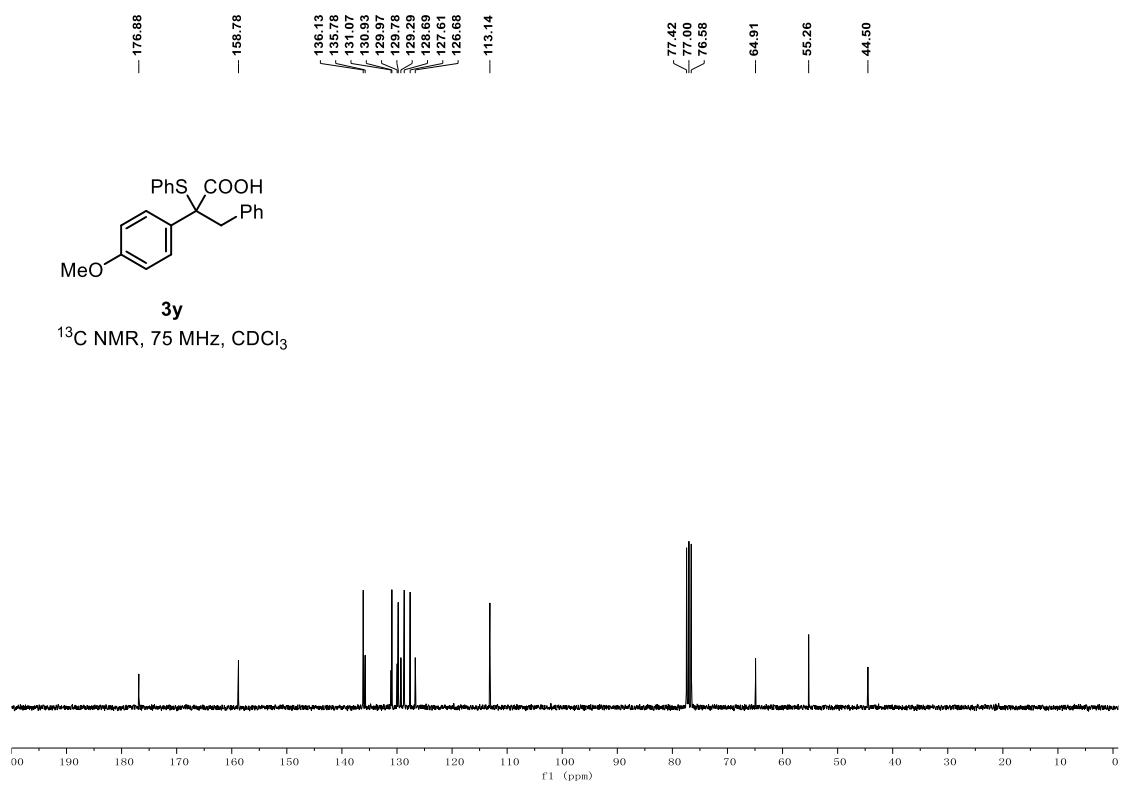



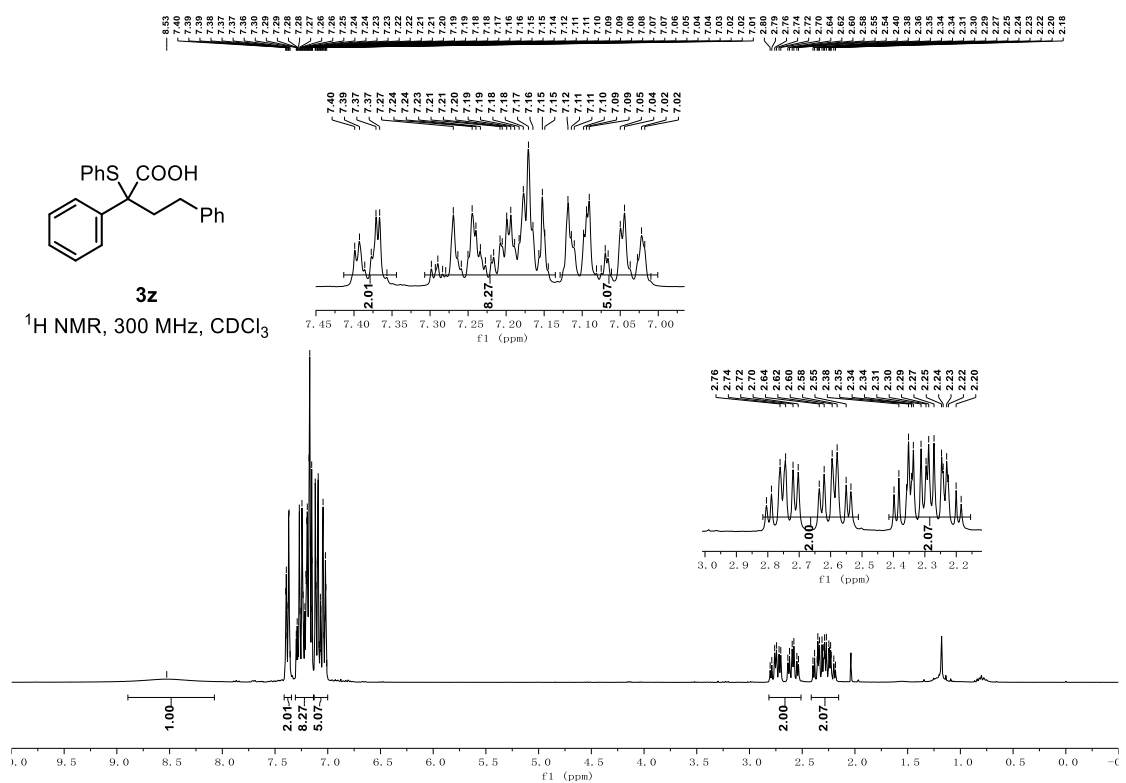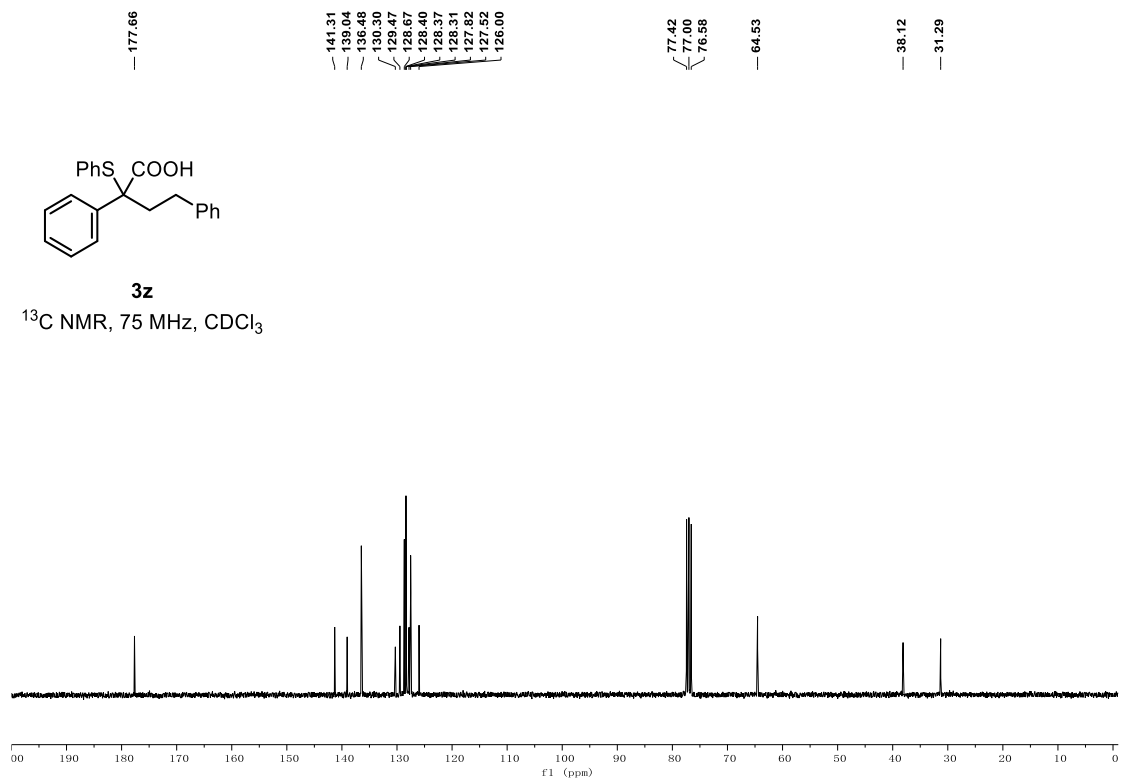

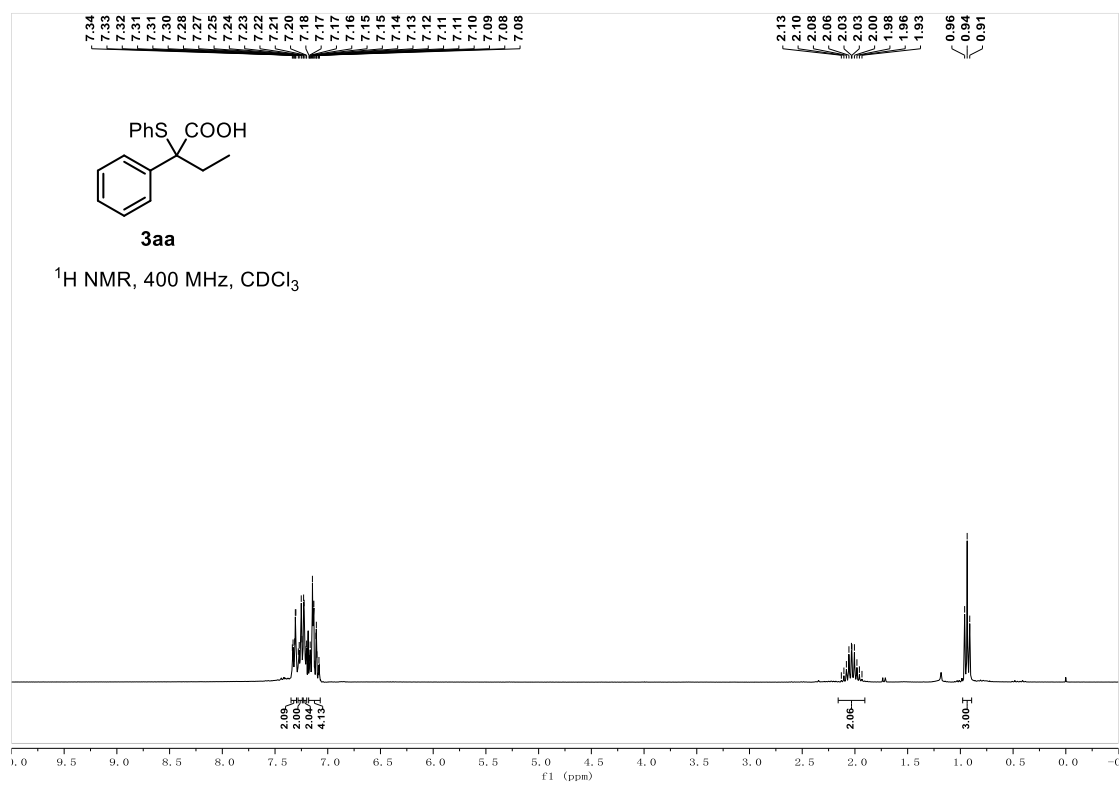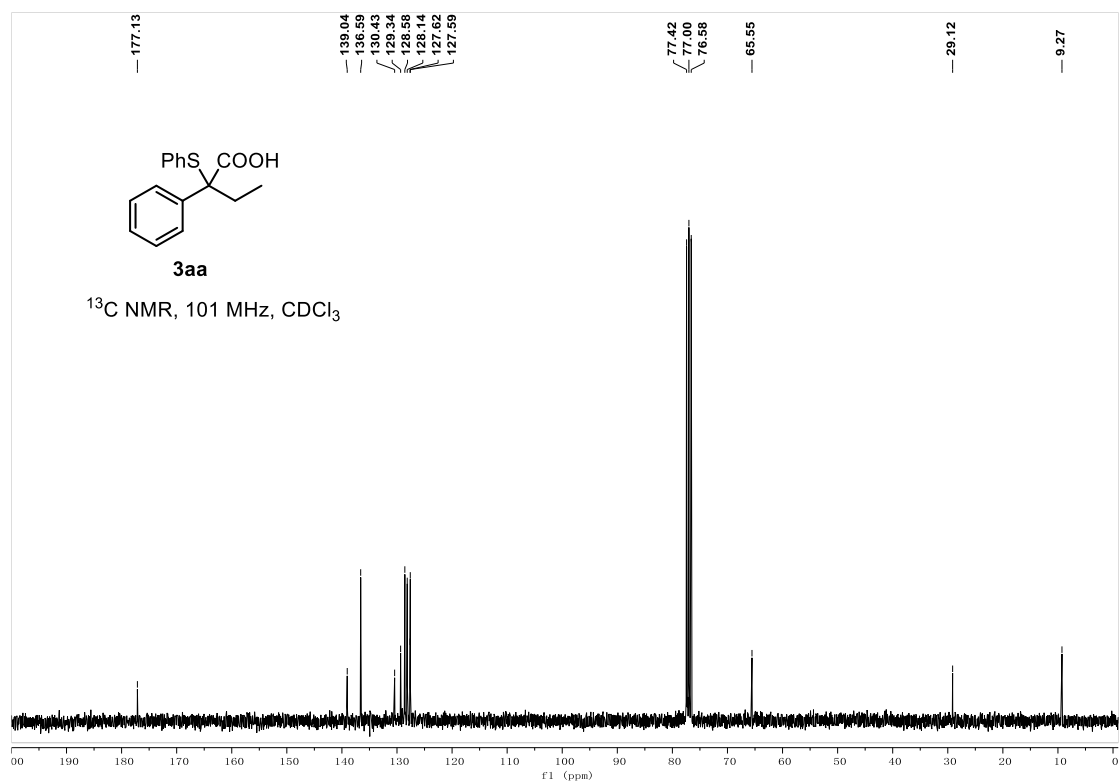

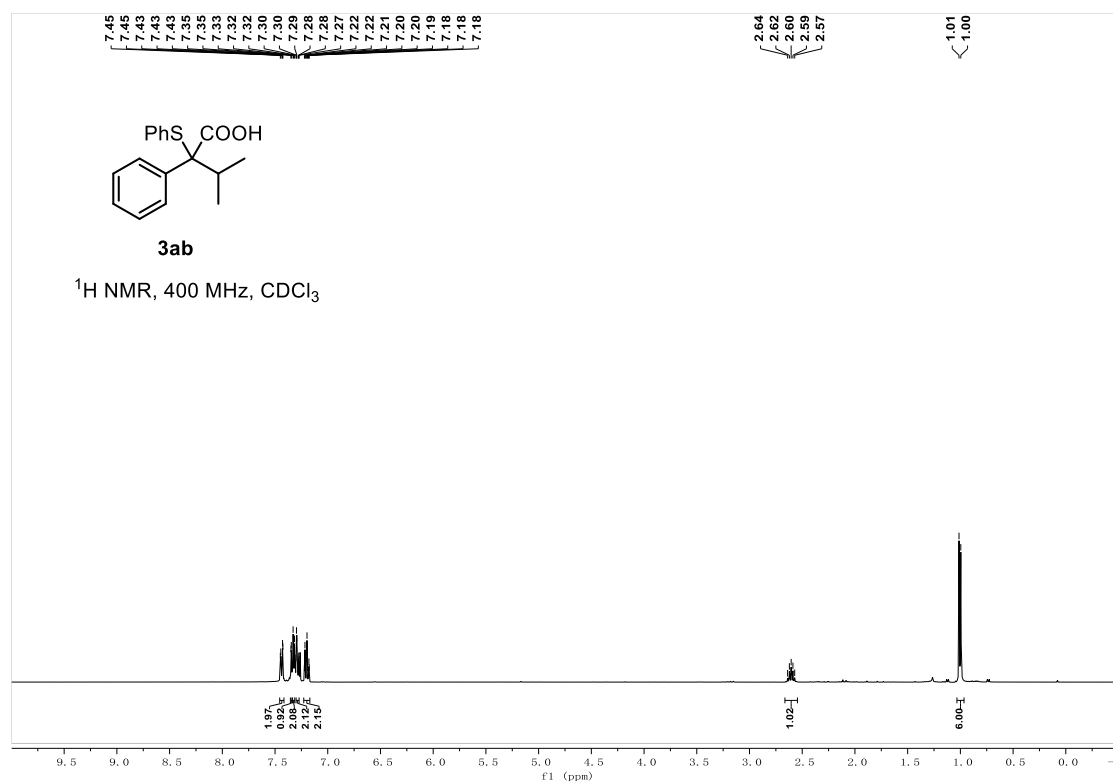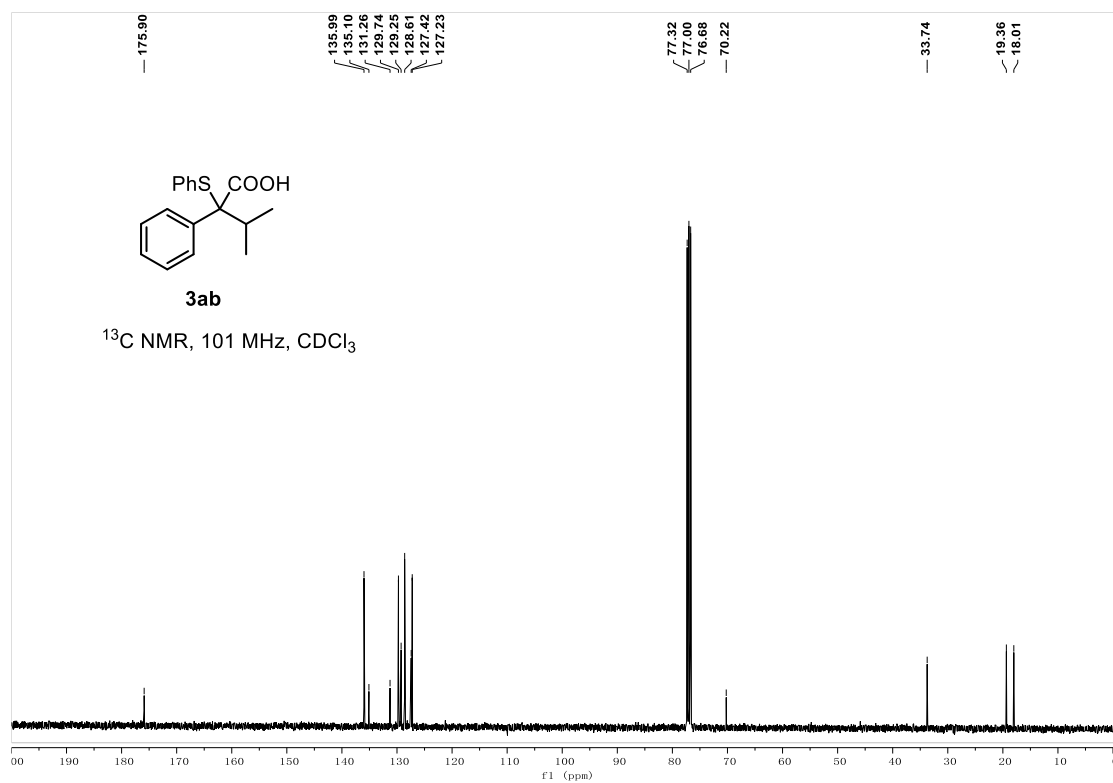

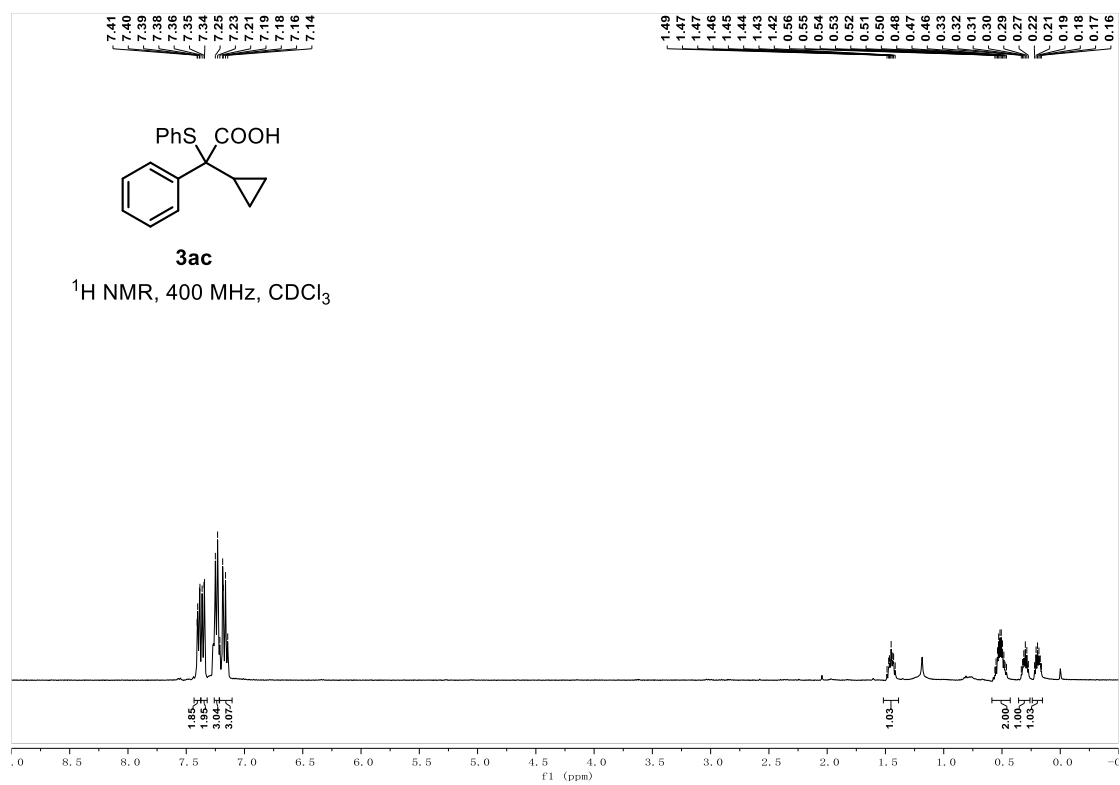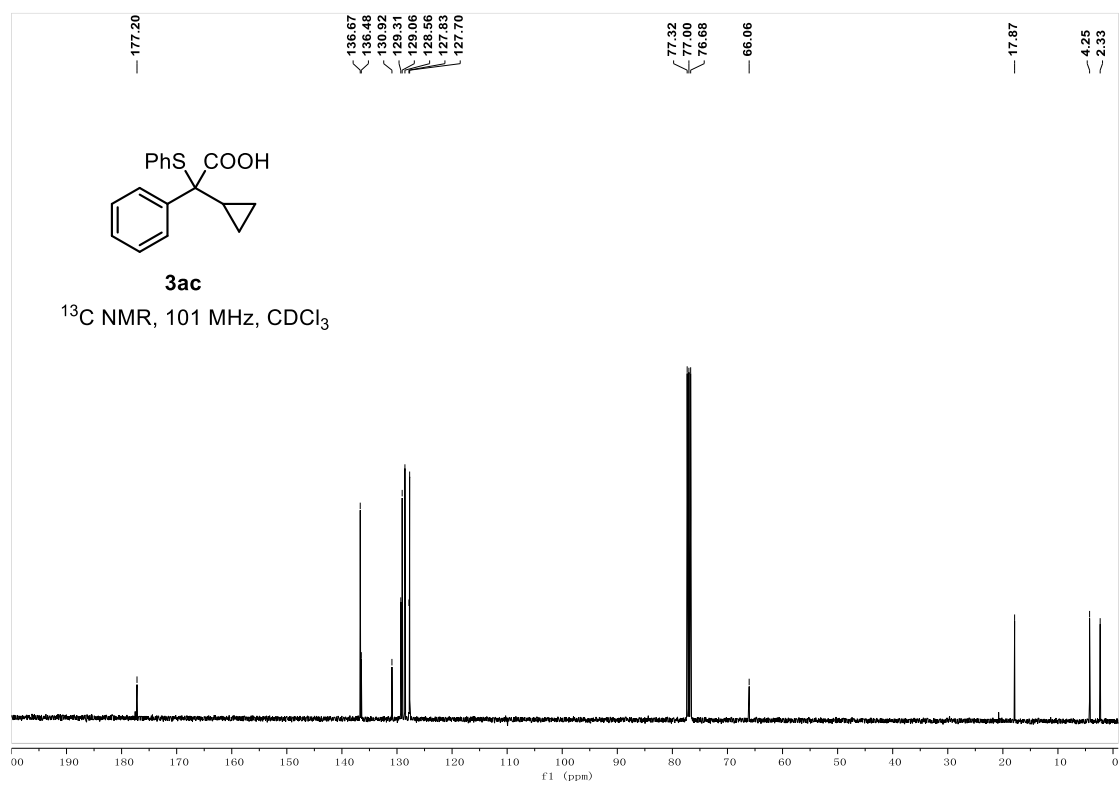

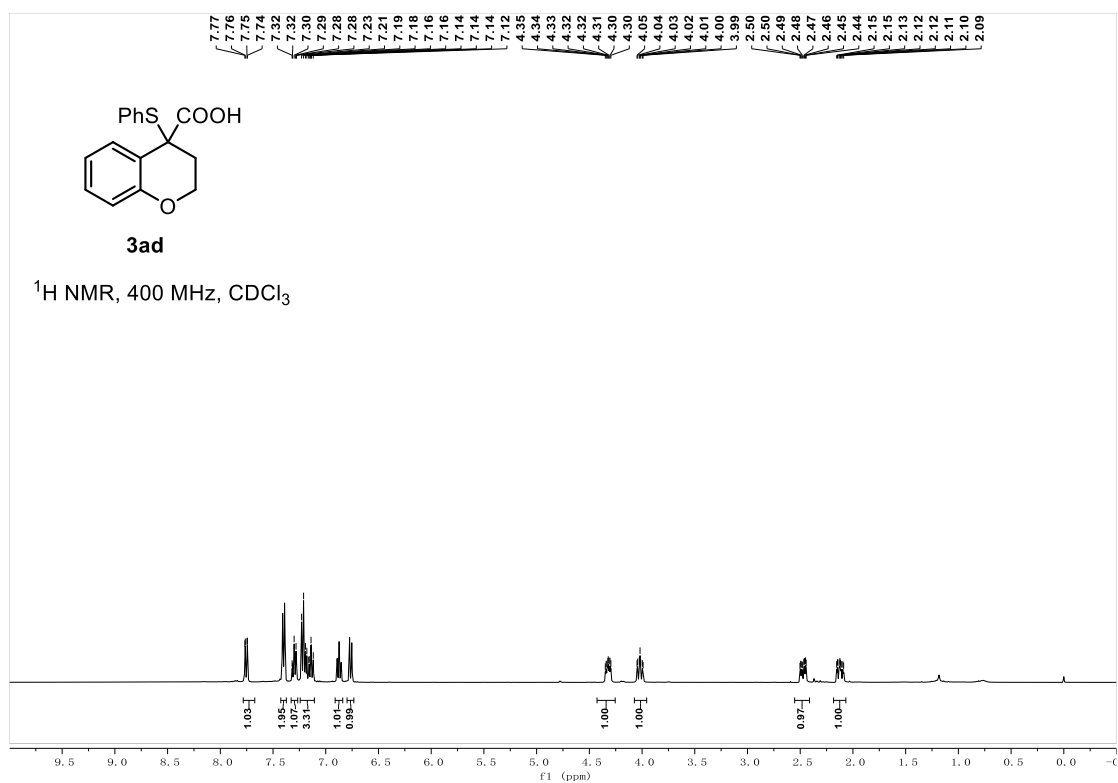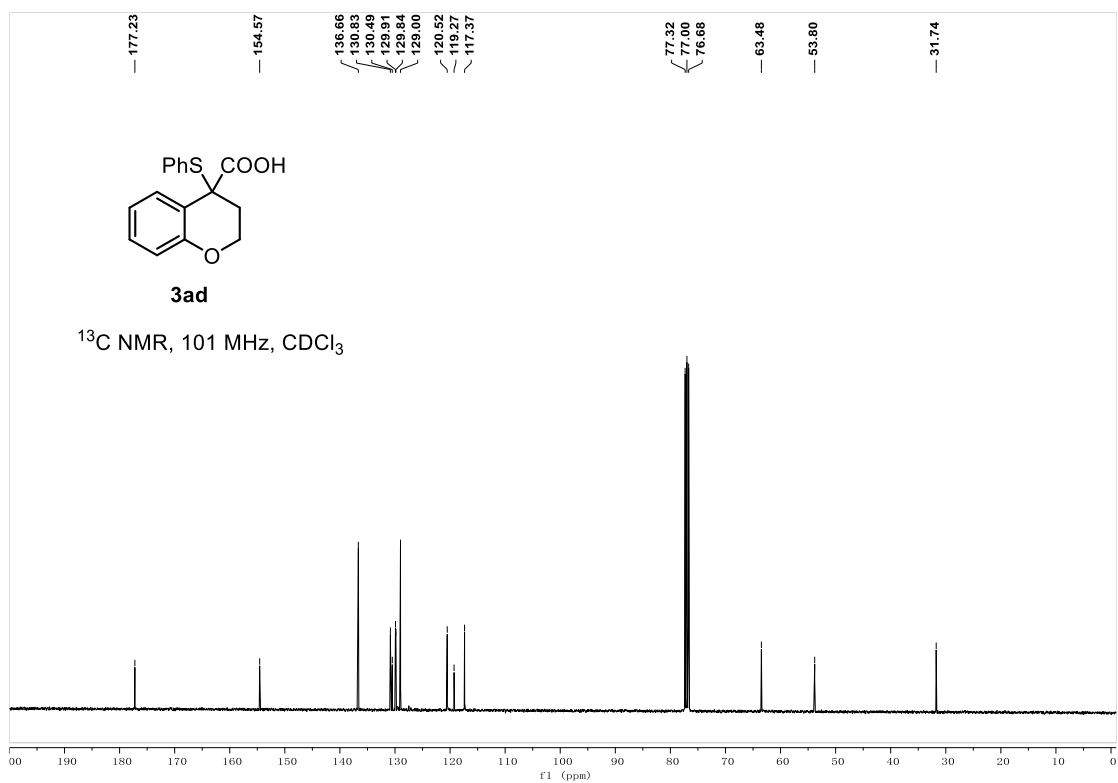

7.41  
7.41  
7.40  
7.40  
7.40  
7.39  
7.39  
7.38  
7.37  
7.36  
7.35  
7.35  
7.34  
7.34  
7.33  
7.32  
7.31  
7.31  
7.30  
7.30  
7.29  
7.29  
7.28  
7.27  
7.26  
7.25  
7.25  
7.24  
7.23  
7.22  
7.21  
7.21  
7.21  
7.20  
7.19  
7.18  
7.18  
7.16  
7.16  
7.14  
7.14  
6.50  
2.20  
2.18  
2.16  
2.11  
2.10  
2.08  
2.06  
2.03  
2.01  
1.03  
1.01  
0.98

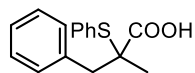

**3ae**

<sup>1</sup>H NMR, 300 MHz, CDCl<sub>3</sub>

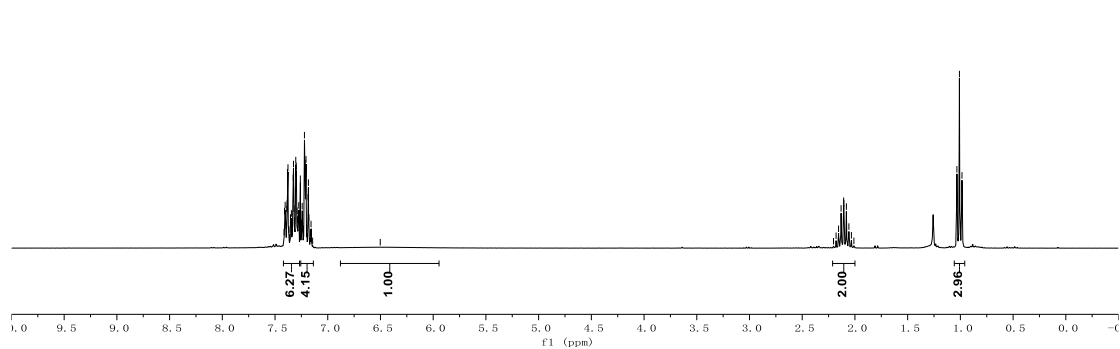

177.09  
139.03  
136.59  
130.43  
129.55  
128.96  
127.64  
127.63  
127.59  
77.42  
77.00  
76.58  
65.55  
29.14  
9.27

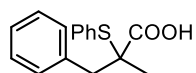

**3ae**

<sup>13</sup>C NMR, 75 MHz, CDCl<sub>3</sub>

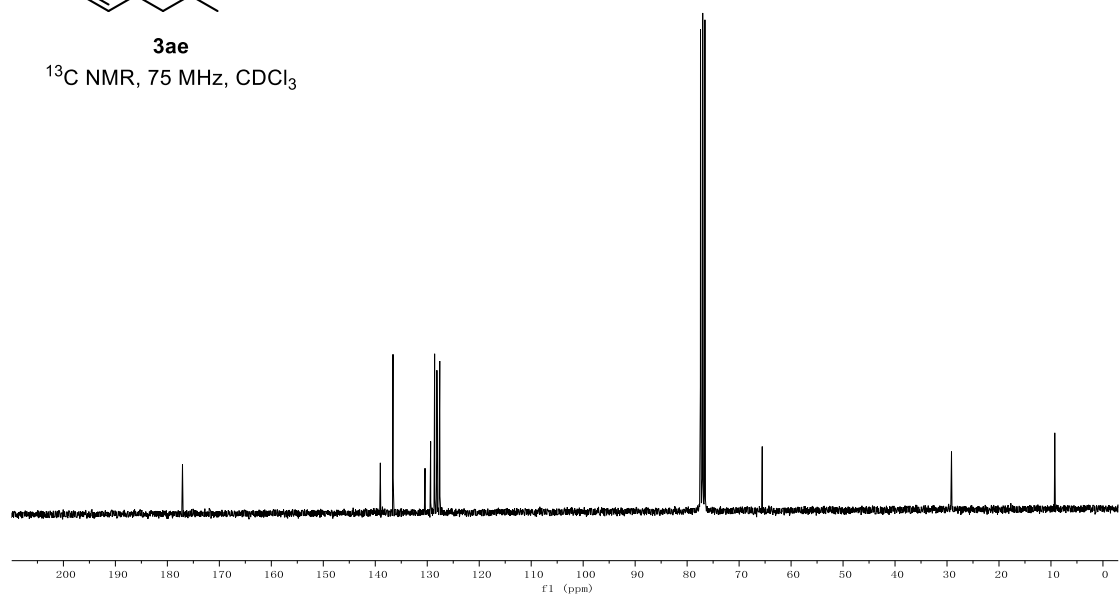

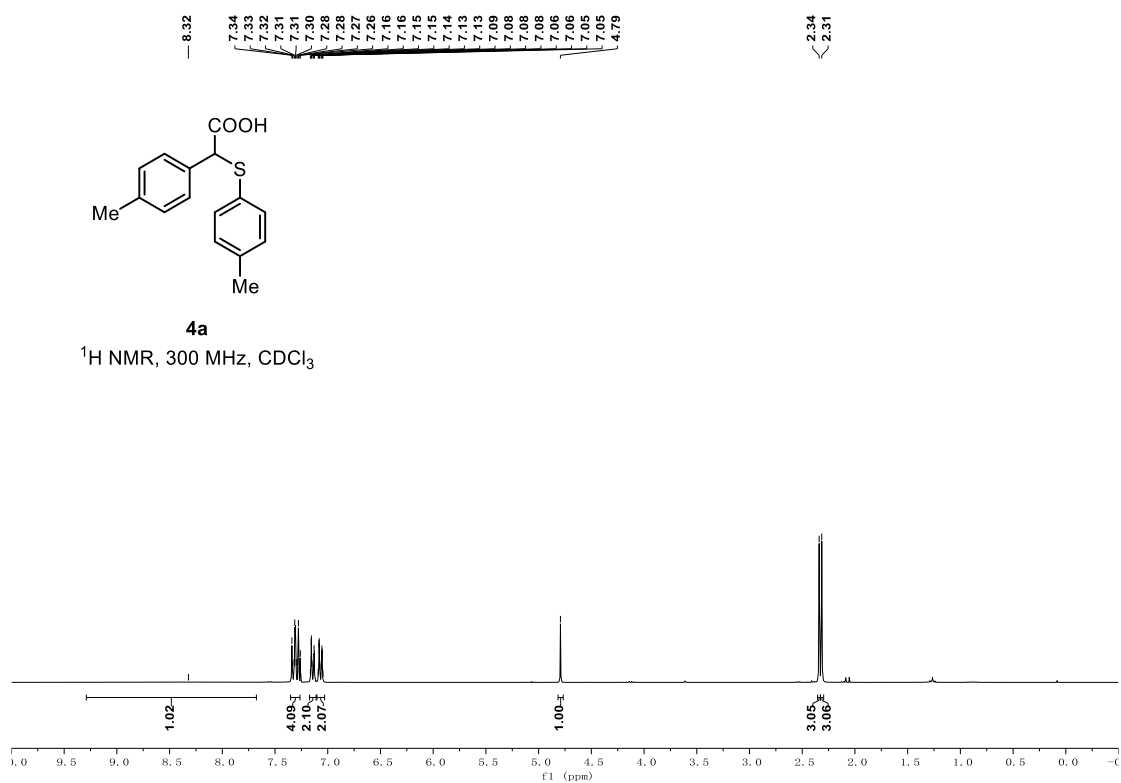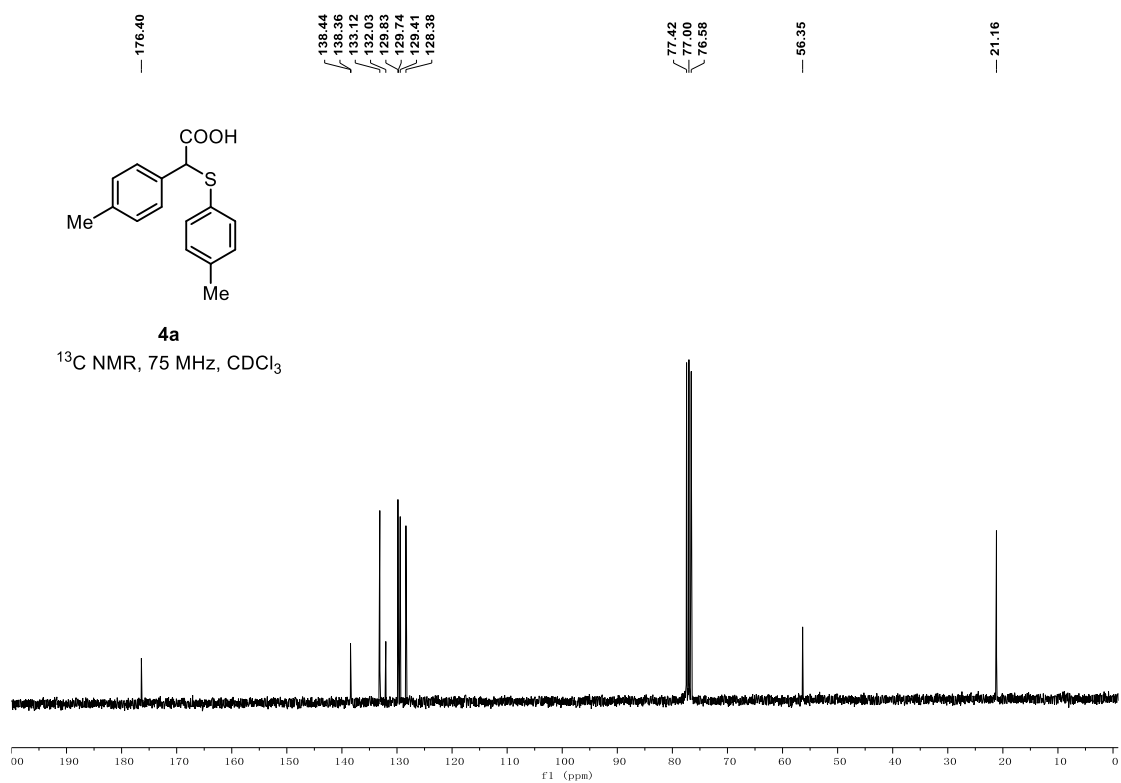

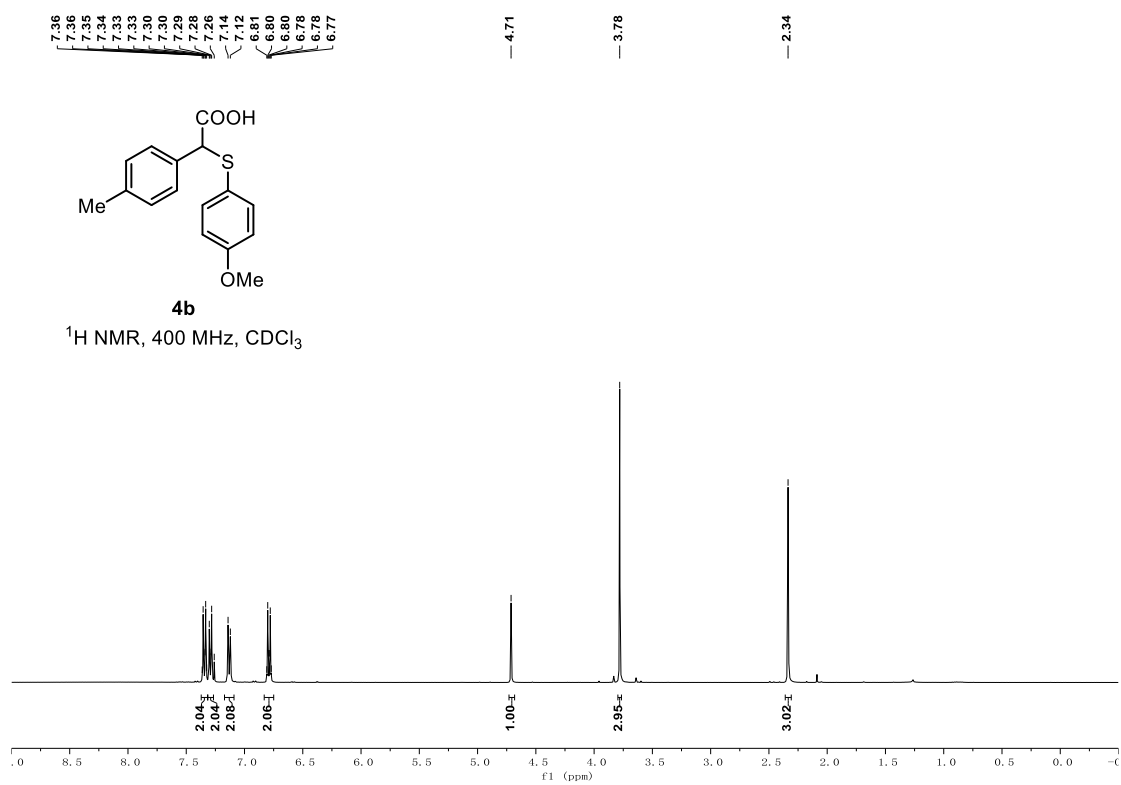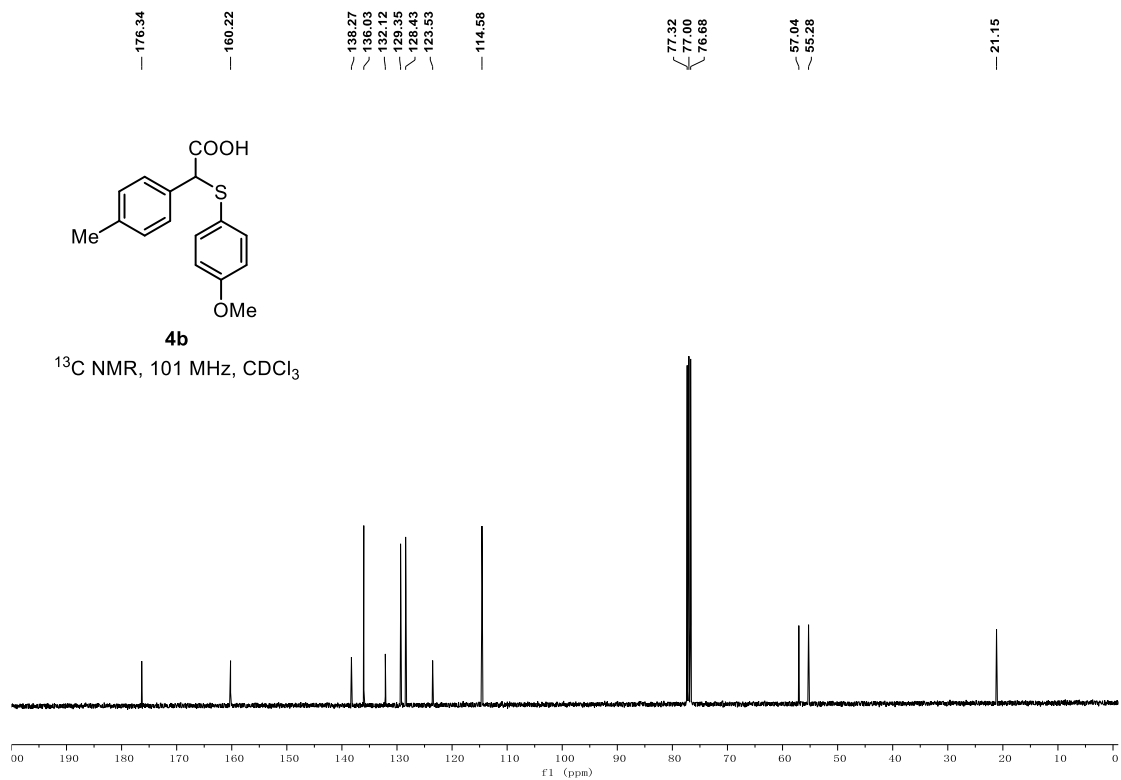



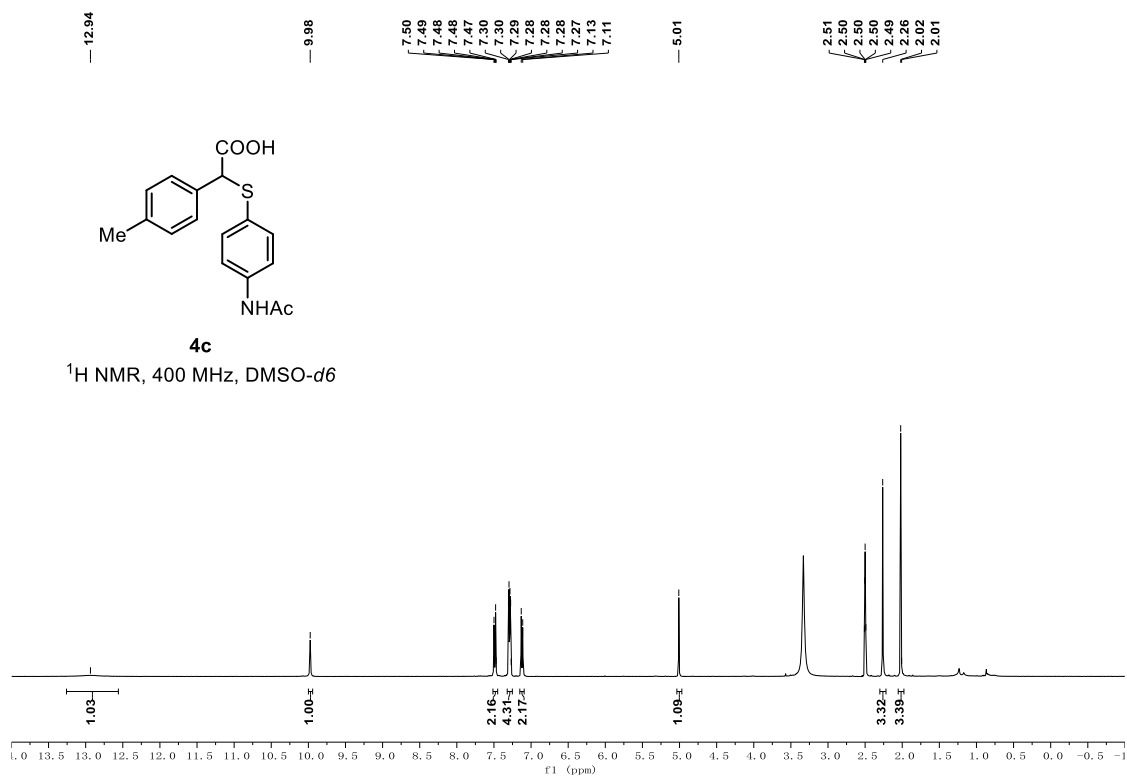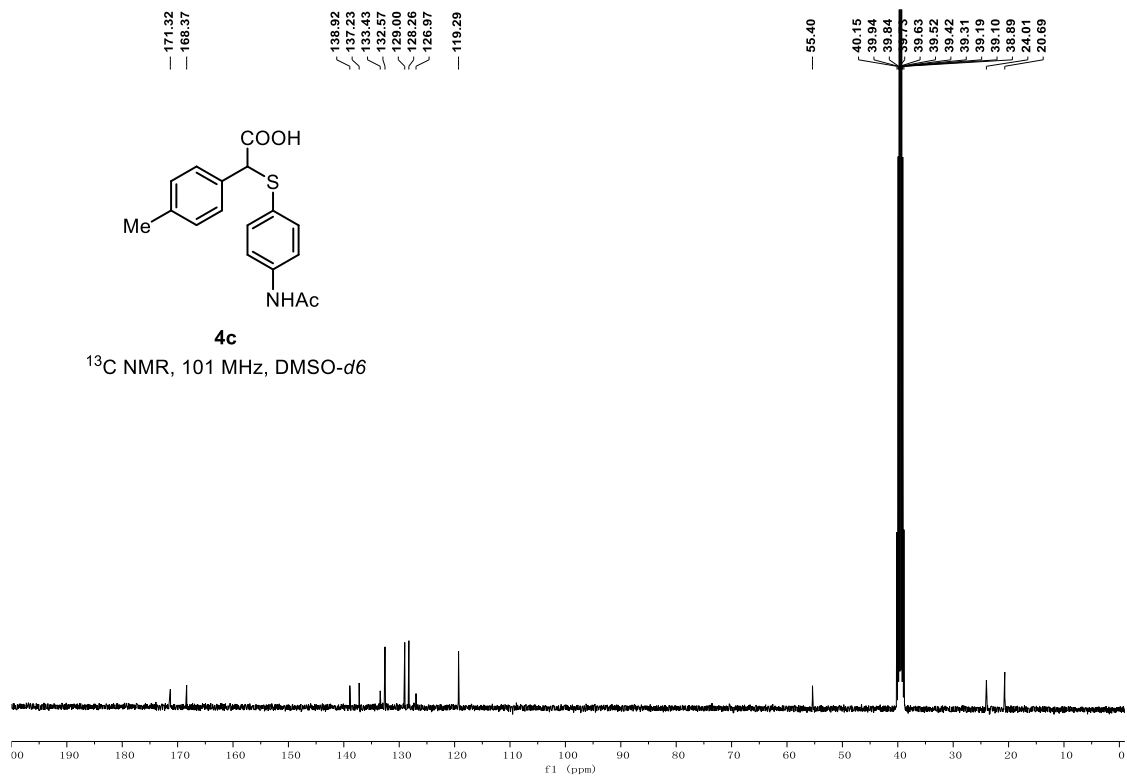

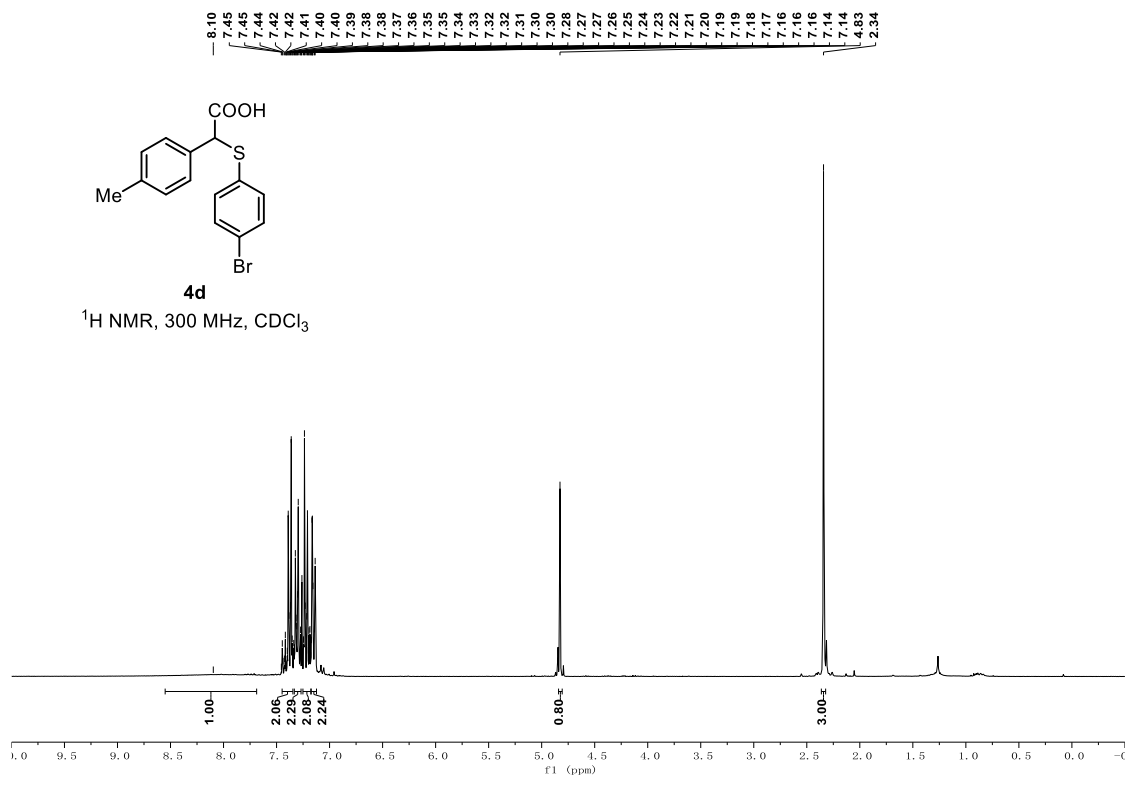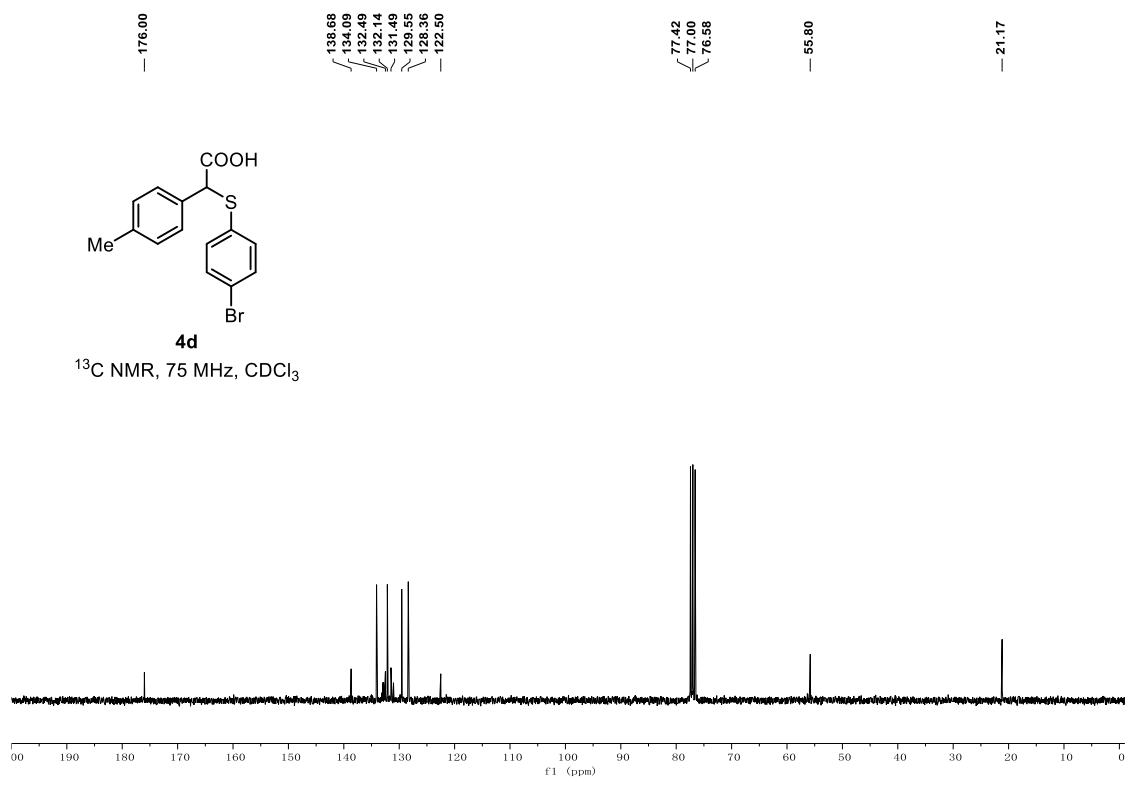

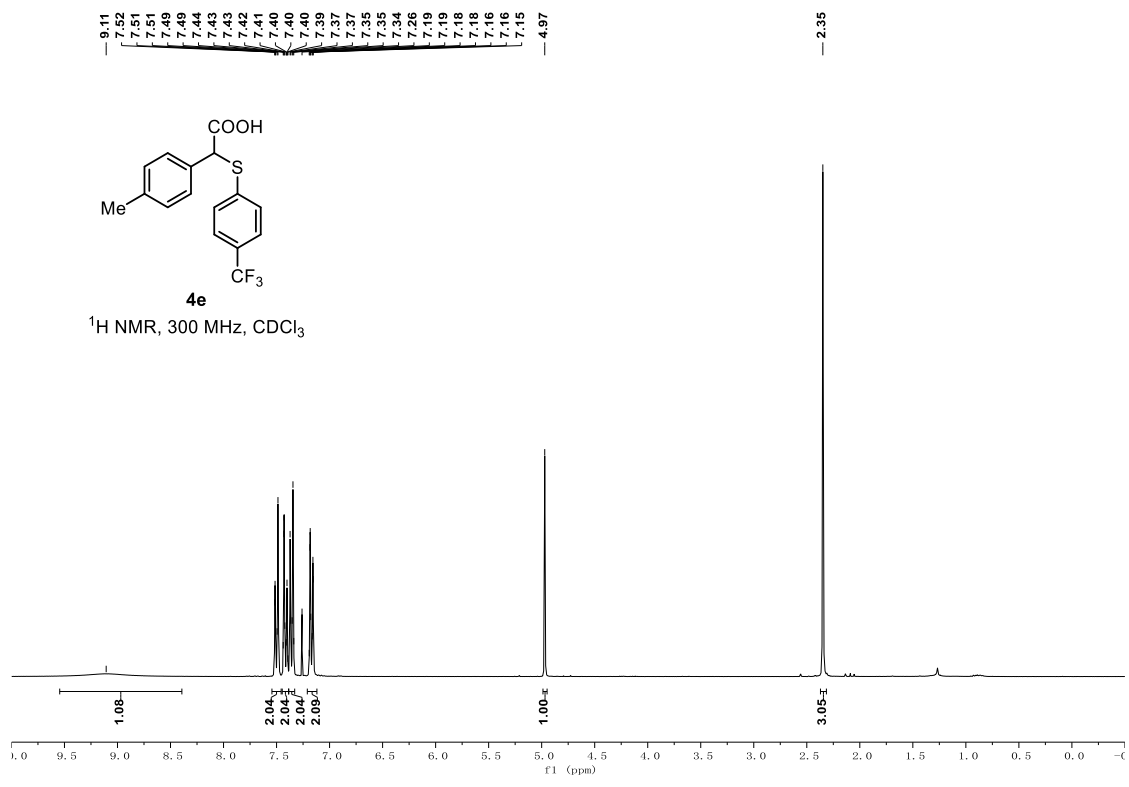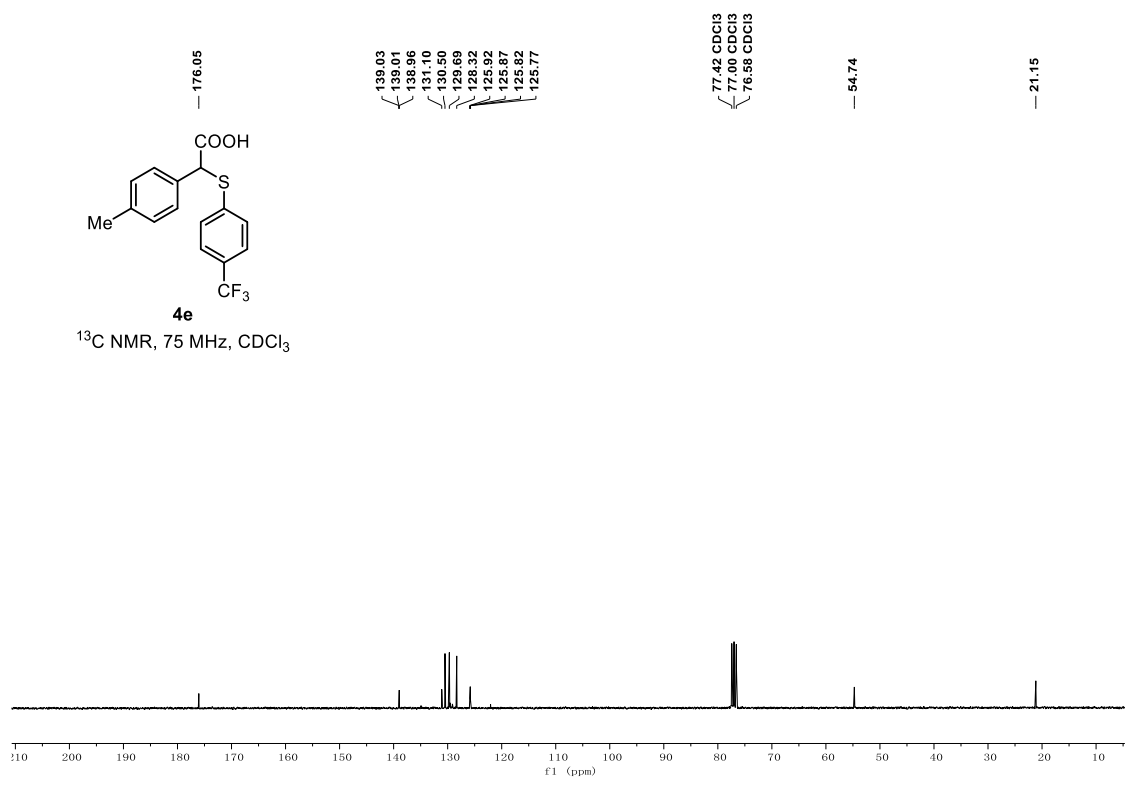

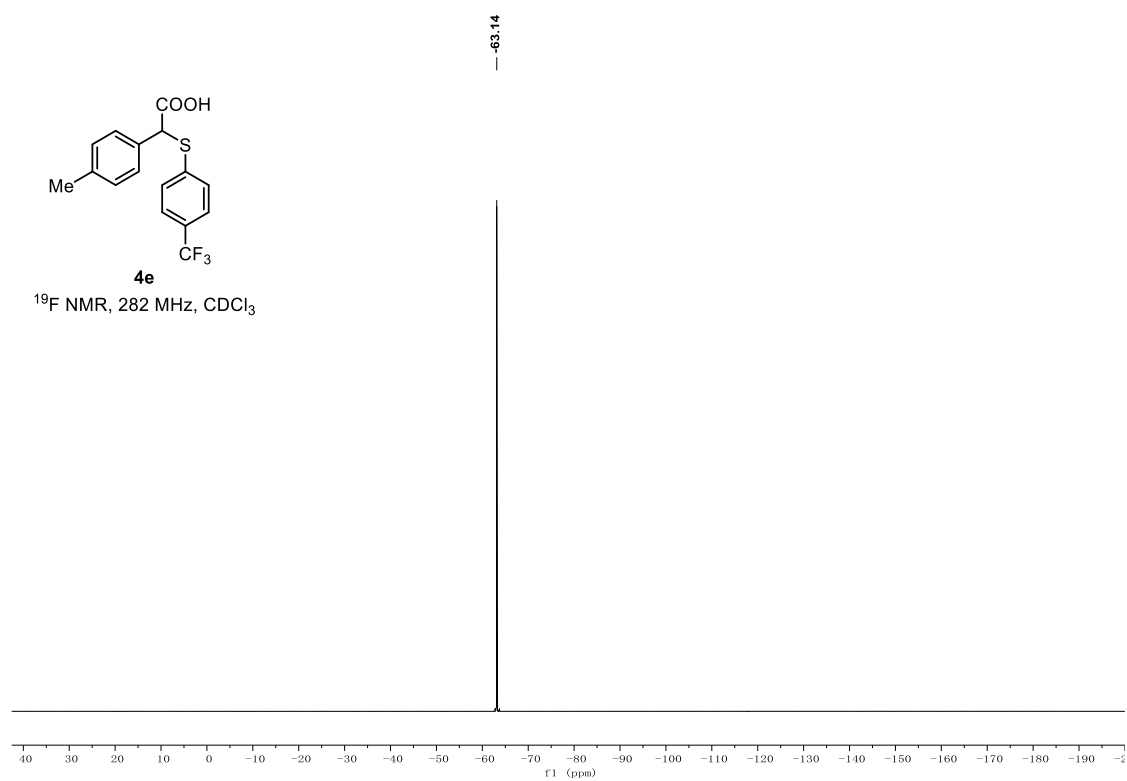

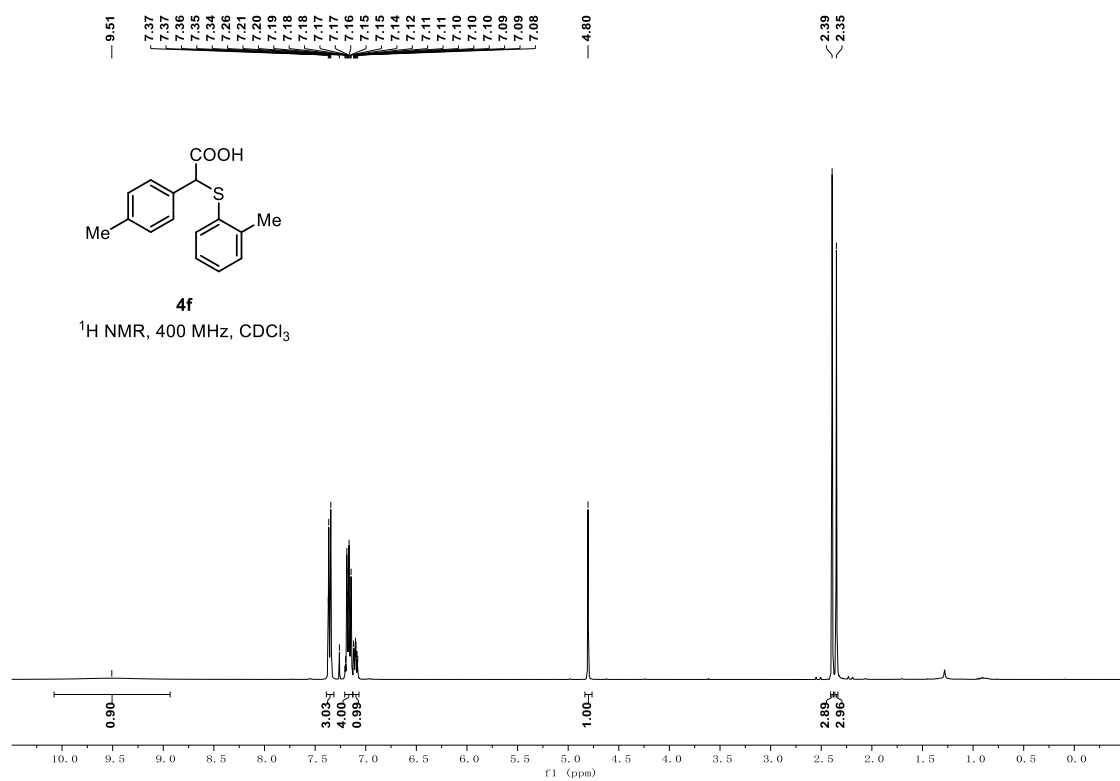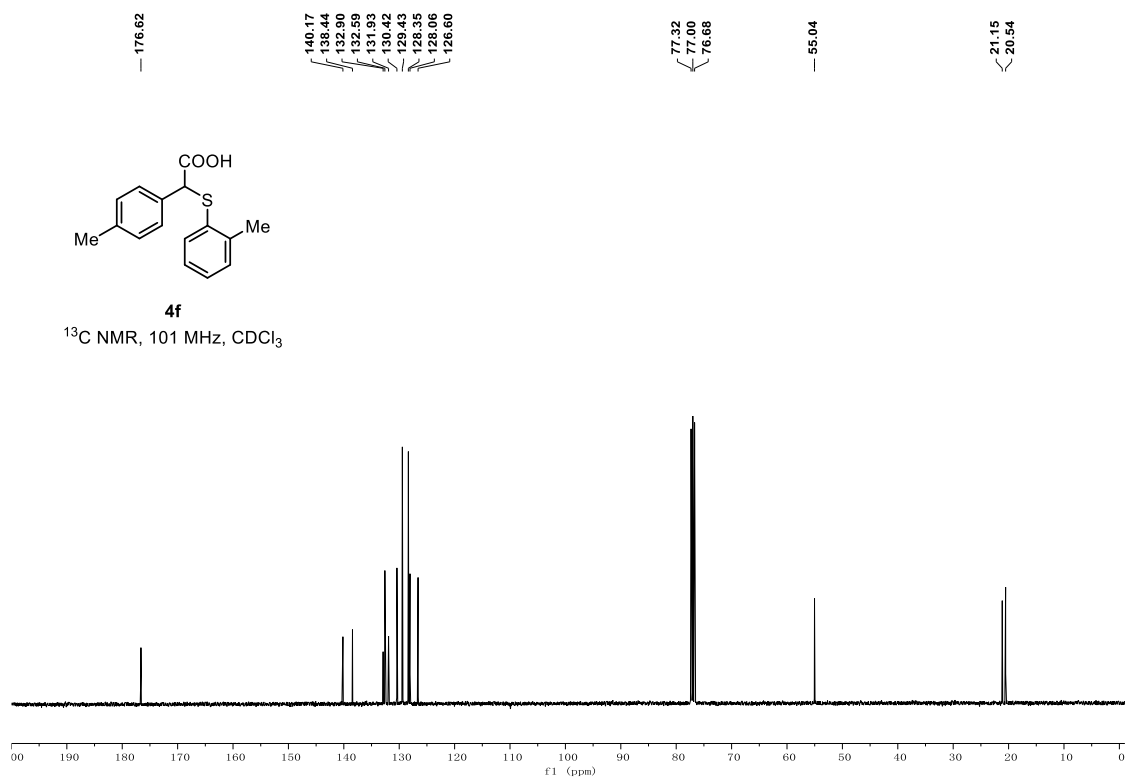

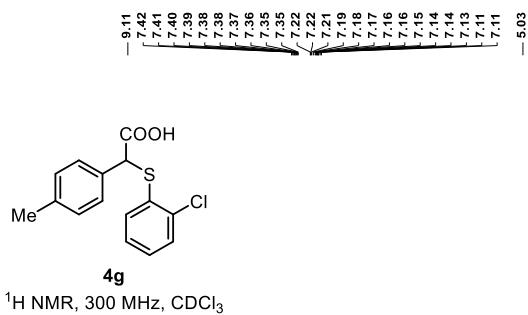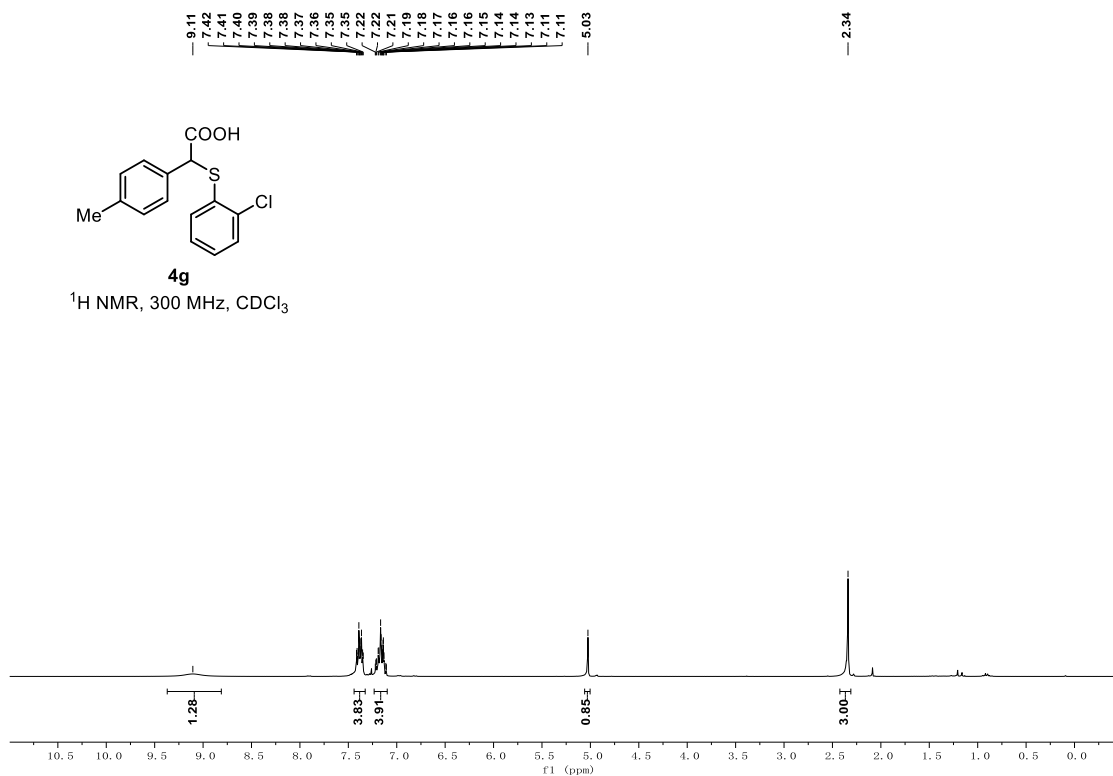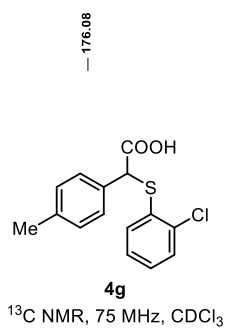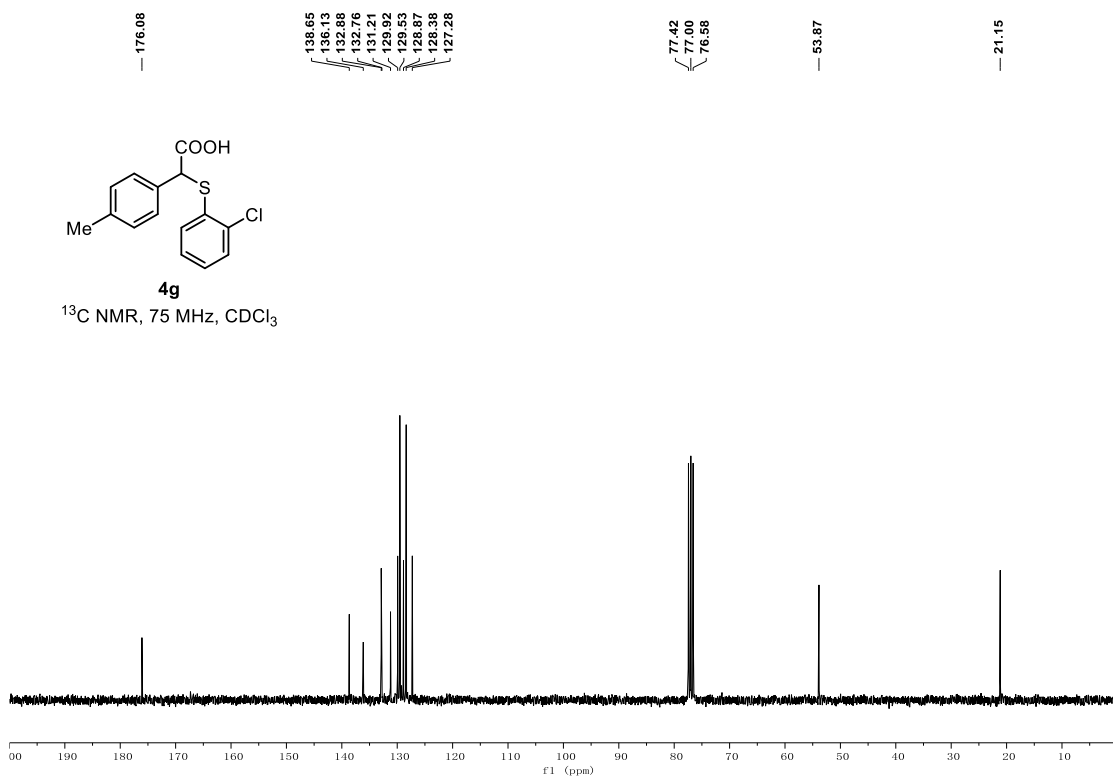

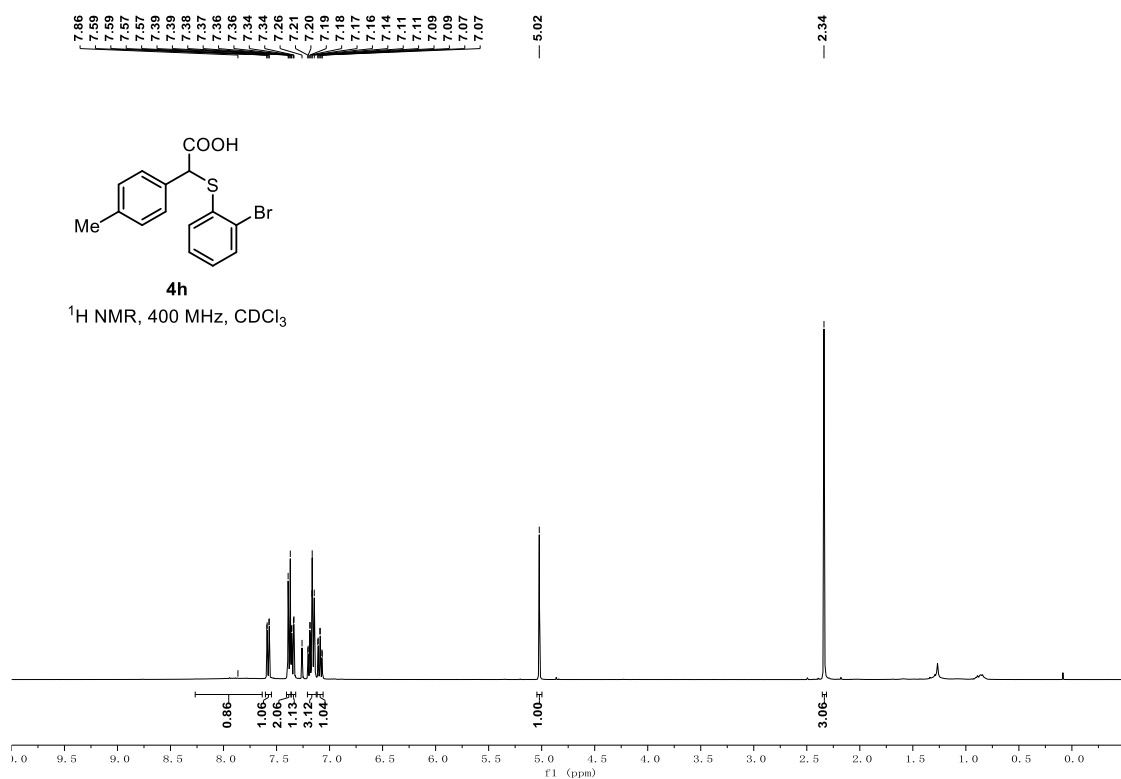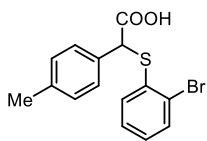

4h

<sup>1</sup>H NMR, 400 MHz, CDCl<sub>3</sub>

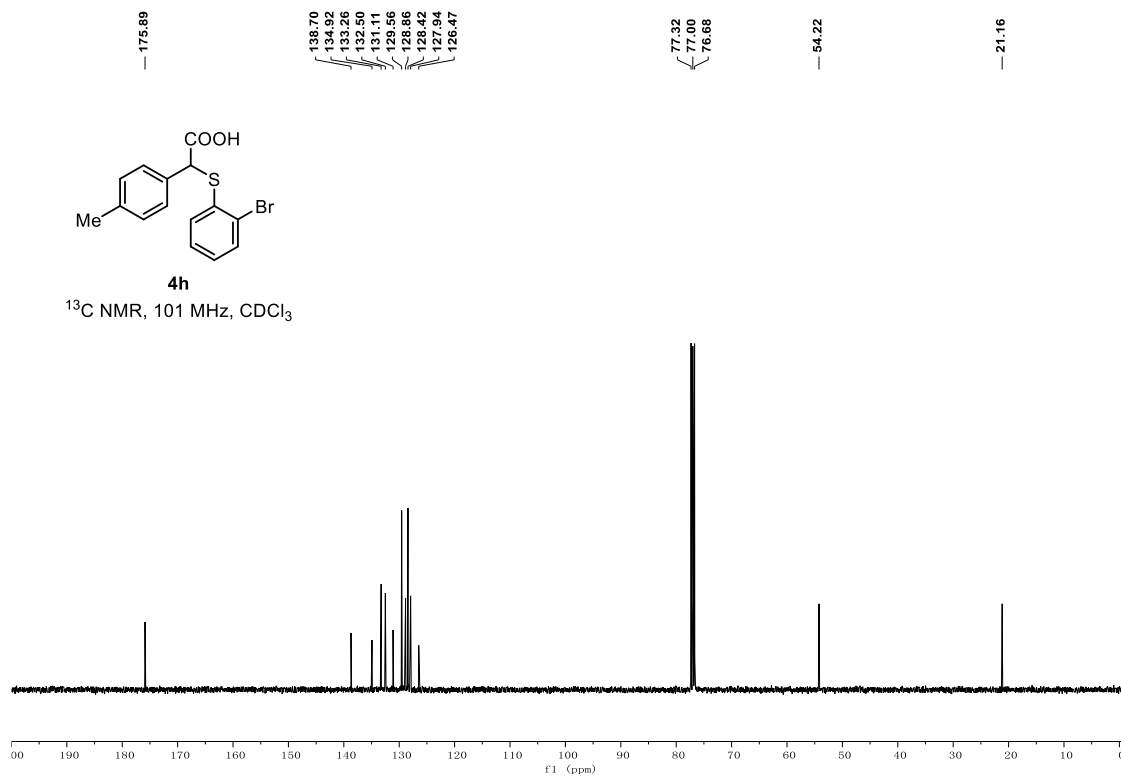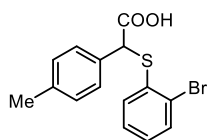

4h

<sup>13</sup>C NMR, 101 MHz, CDCl<sub>3</sub>

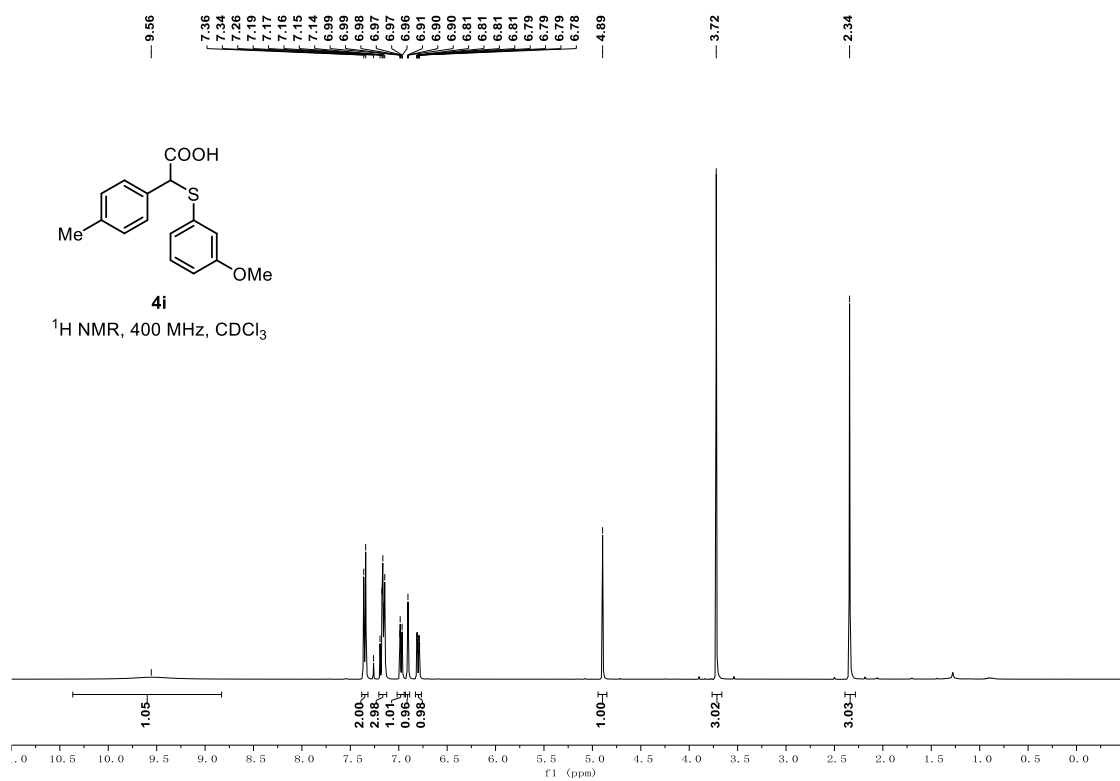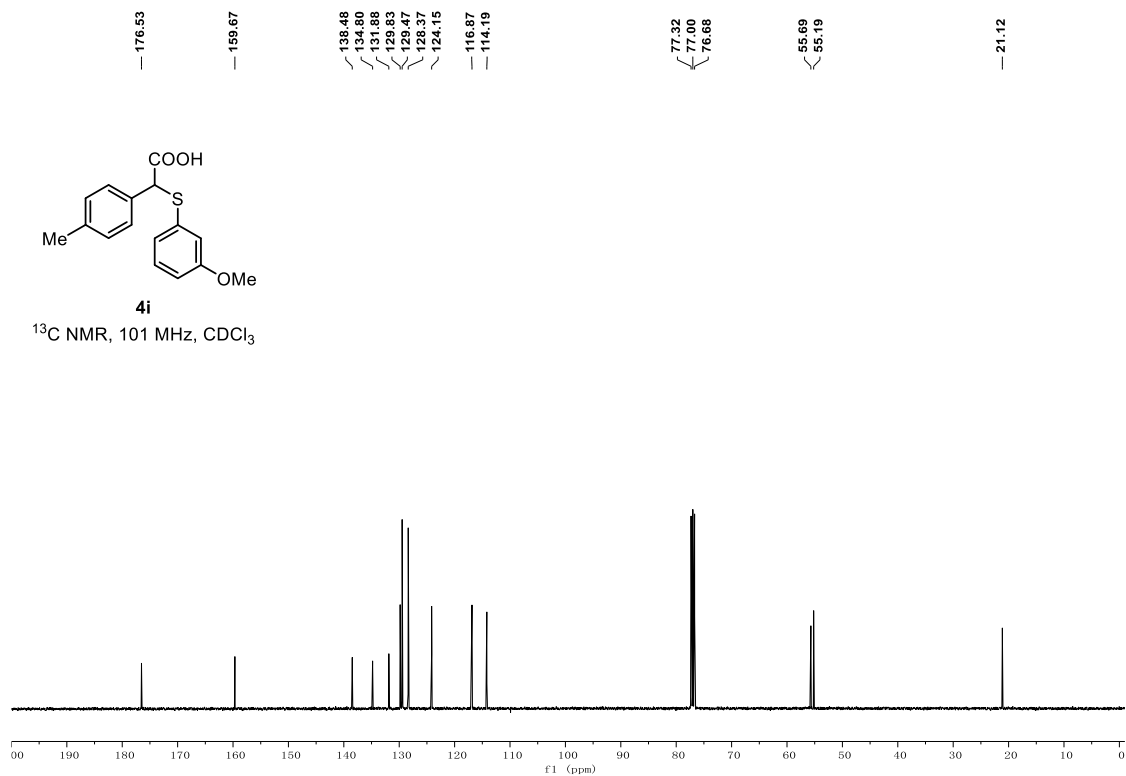



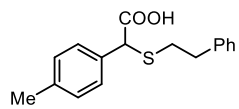

**4j**

<sup>1</sup>H NMR, 400 MHz, CDCl<sub>3</sub>

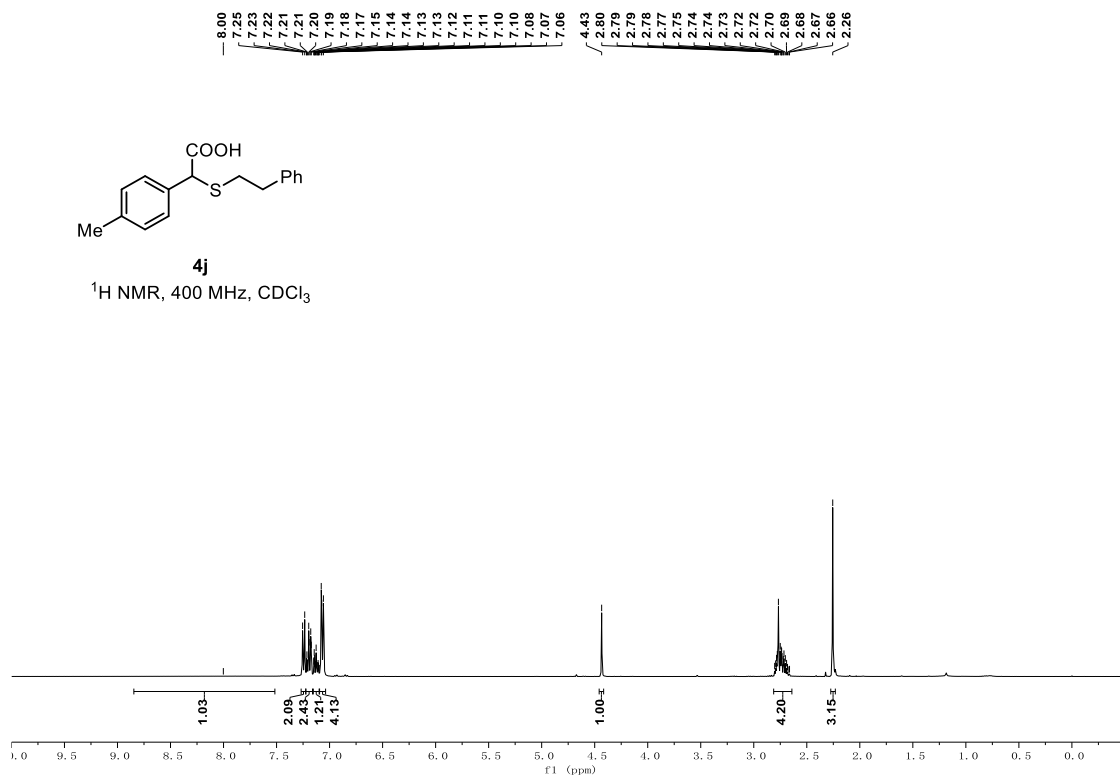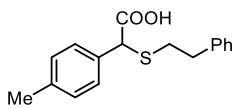

**4j**

<sup>13</sup>C NMR, 101 MHz, CDCl<sub>3</sub>

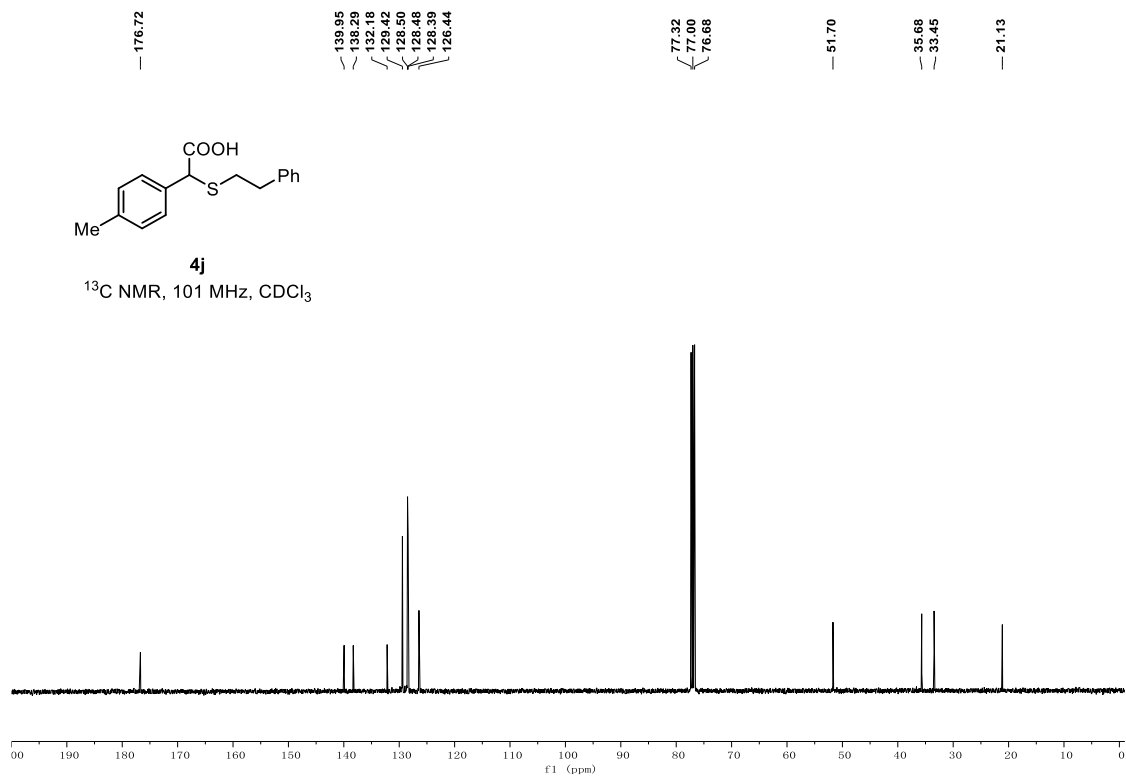

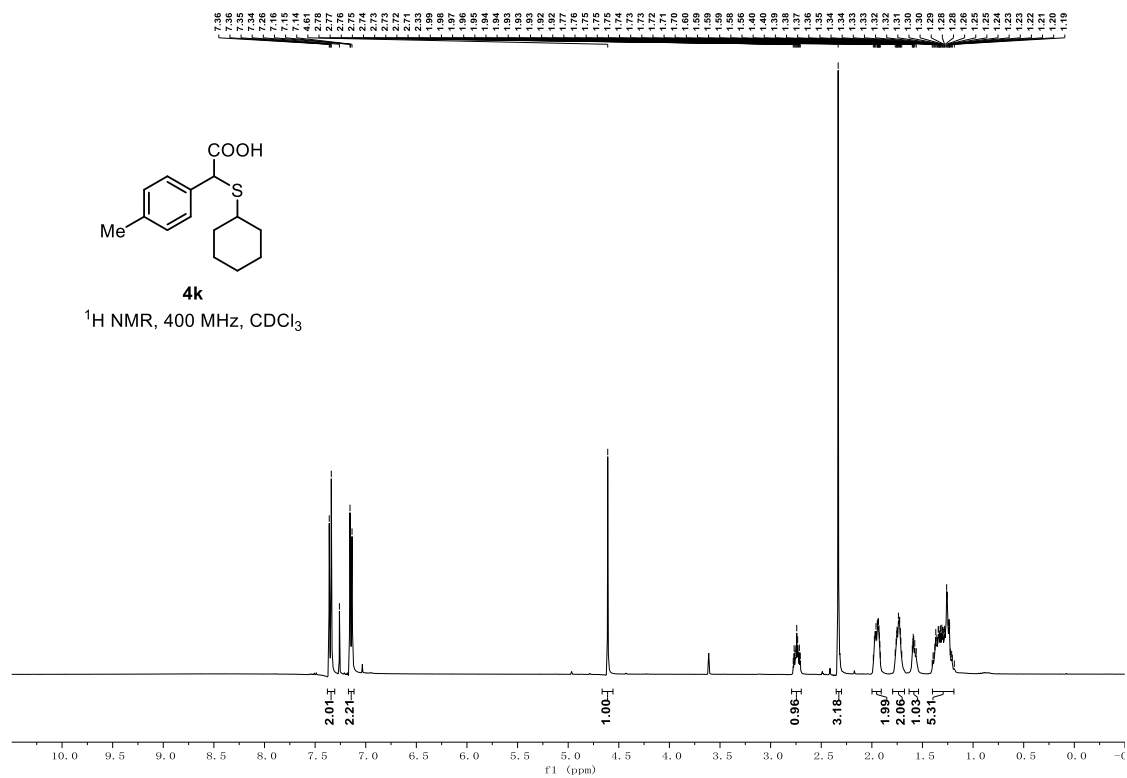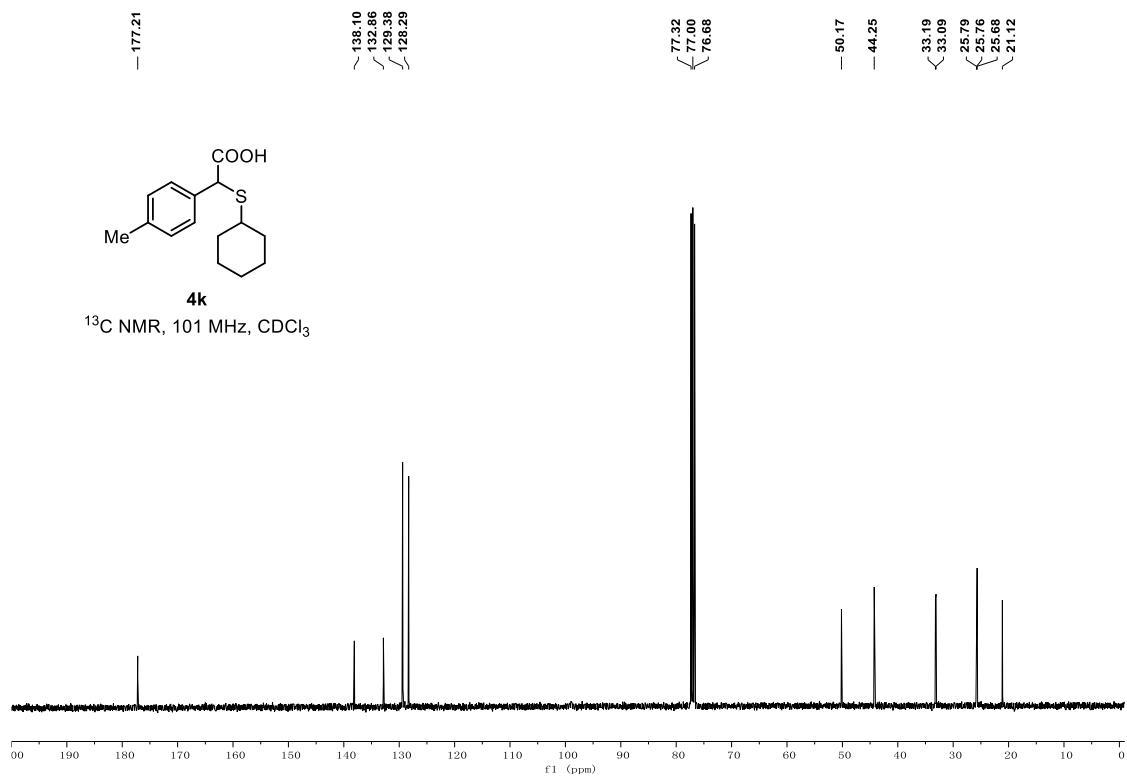

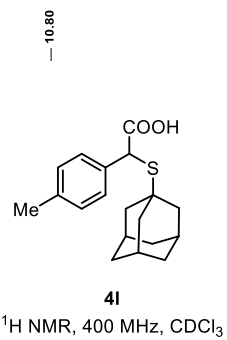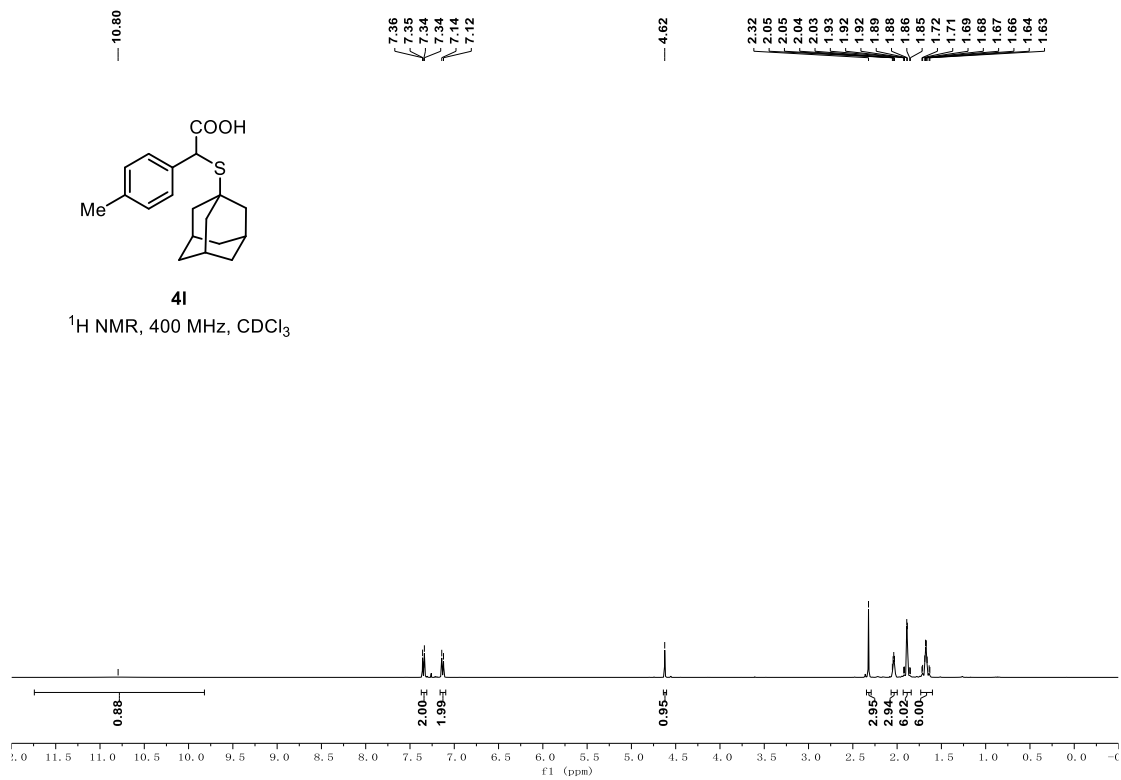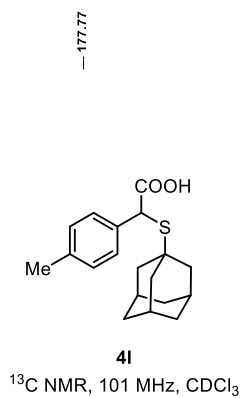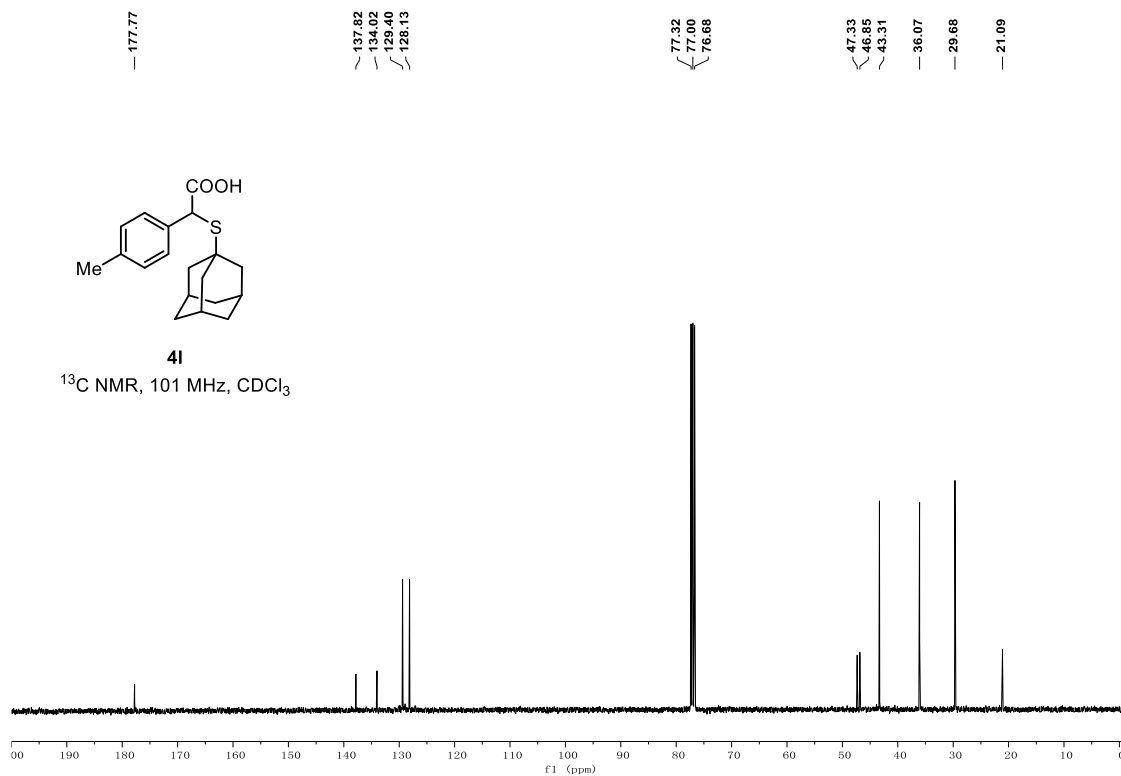

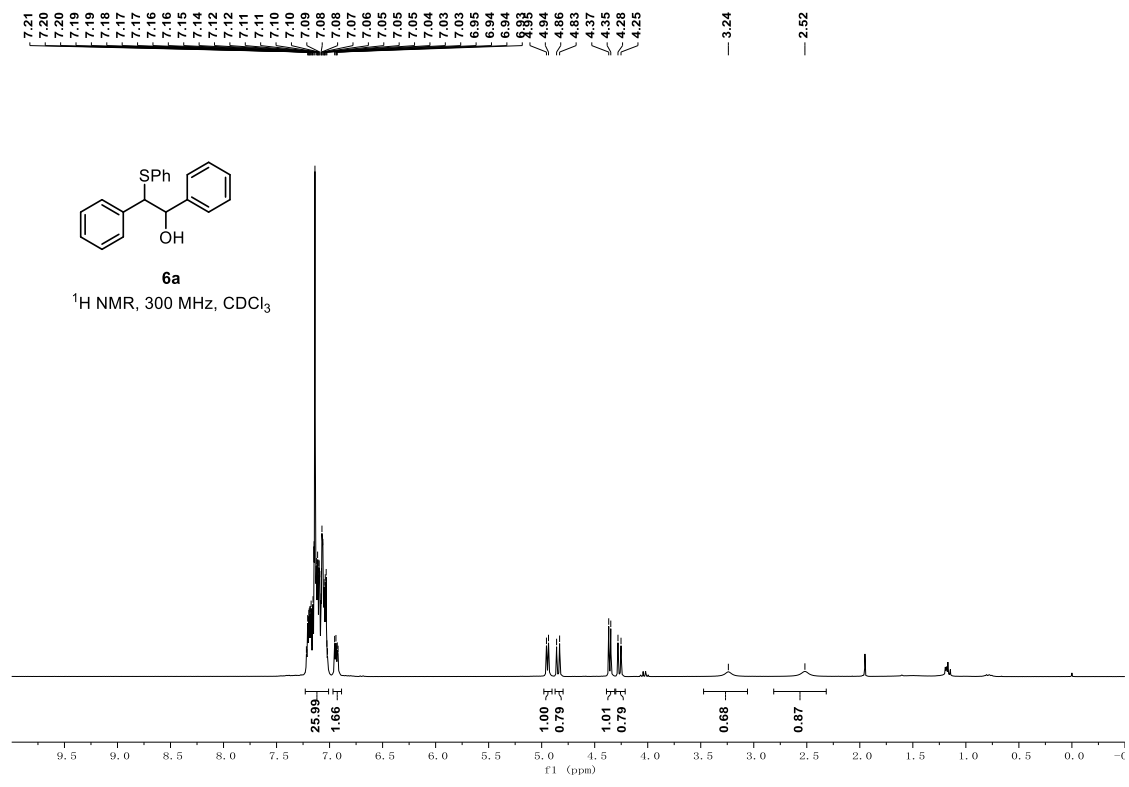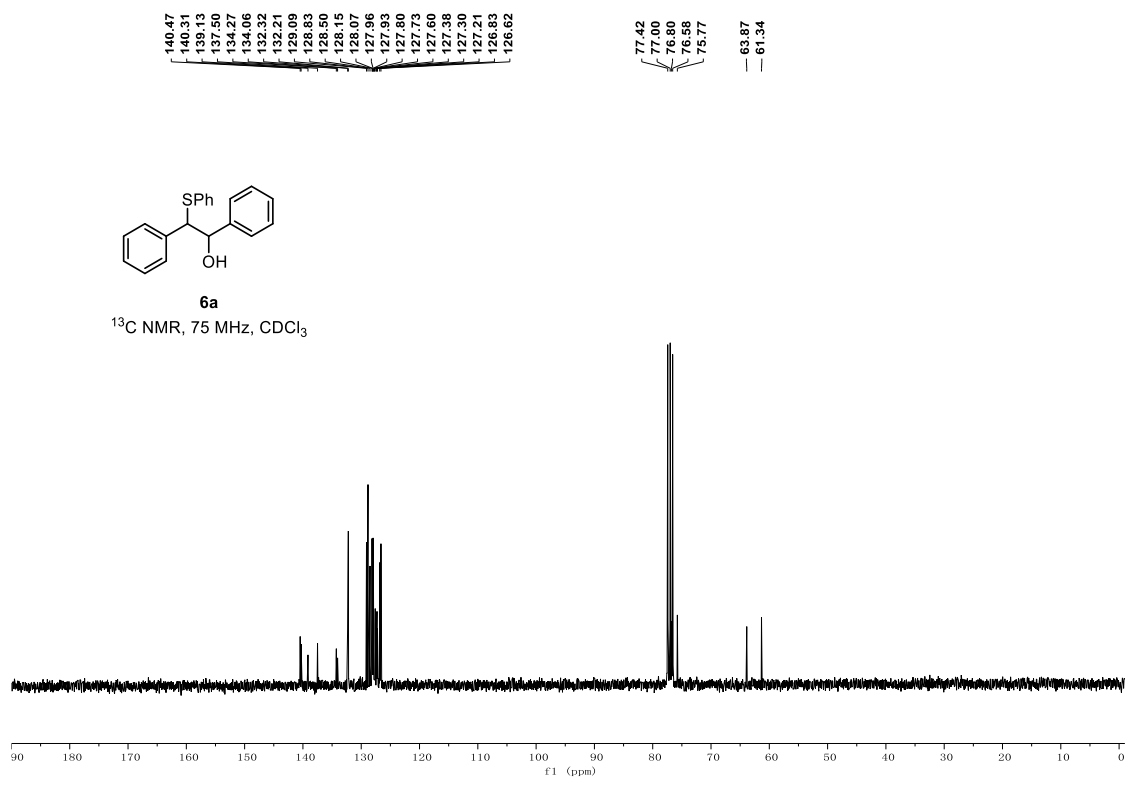

8.22  
8.21  
8.20  
8.19  
8.18  
8.16  
8.14  
8.13  
7.42  
7.40  
7.40  
7.39  
7.35  
7.34  
7.34  
7.32  
7.32  
7.31  
7.19  
7.18  
7.17  
7.17  
7.16  
7.16  
7.15  
7.15  
7.13  
7.12  
7.11  
7.10  
7.10  
7.09  
7.09  
7.08  
7.08  
7.07  
7.06  
7.06  
7.05  
7.04  
7.03  
7.01  
7.01  
7.00  
6.99  
6.98  
6.98  
6.97  
6.97  
6.96  
6.94  
6.94  
6.93  
6.92  
4.97  
4.95  
4.89  
4.86  
4.30  
4.28  
4.26  
4.24

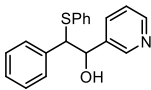

**6b**

<sup>1</sup>H NMR, 300 MHz, CDCl<sub>3</sub>

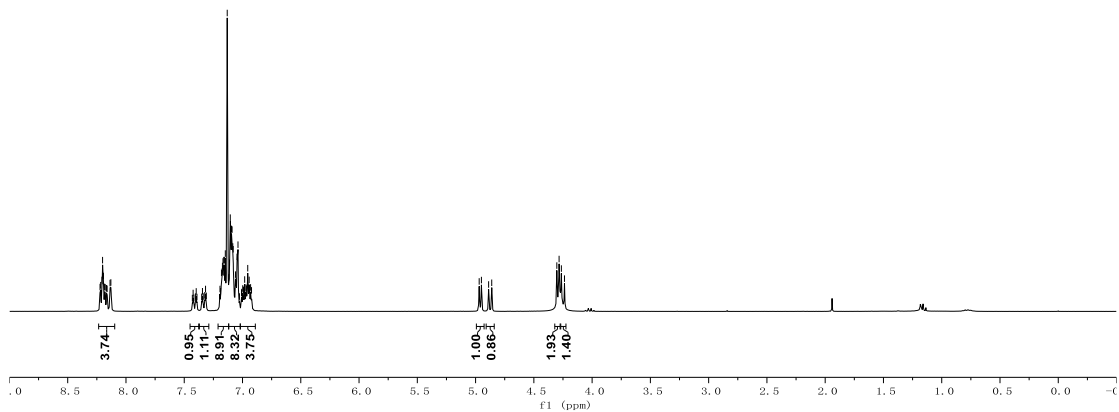

148.38  
148.32  
148.06  
147.90  
138.47  
137.23  
136.84  
136.71  
134.72  
134.61  
134.06  
133.82  
132.23  
132.09  
128.05  
128.88  
128.82  
128.50  
128.21  
127.70  
127.50  
127.38  
127.35  
127.05  
122.90  
77.42  
77.00  
76.58  
74.46  
73.52  
63.14  
61.14

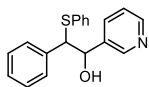

**6b**

<sup>13</sup>C NMR, 75 MHz, CDCl<sub>3</sub>

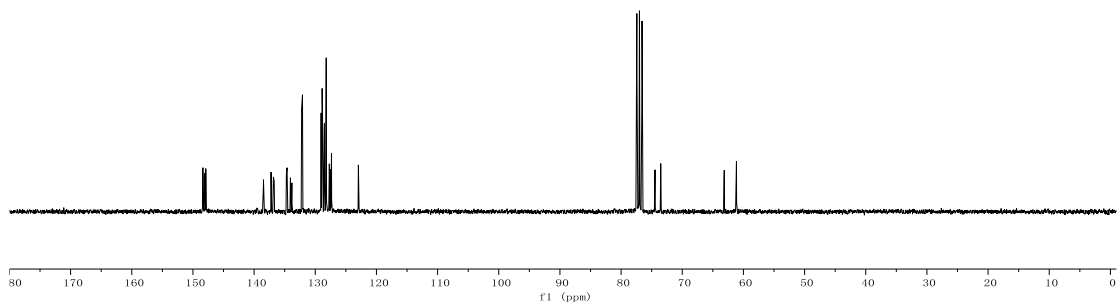



7.28  
7.28  
7.28  
7.26  
7.25  
7.24  
7.24  
7.23  
7.23  
7.22  
7.22  
7.22  
7.21  
7.21  
7.21  
7.20  
7.20  
7.19  
7.19  
7.17  
7.17  
7.16  
7.16  
7.15  
7.15  
7.14  
7.14  
7.13  
7.13  
7.13  
7.12  
7.12  
7.10  
7.09  
7.08  
7.08  
7.07  
6.24  
6.23  
6.23  
6.22  
6.14  
6.14  
6.13  
6.12  
6.06  
6.05  
6.05  
5.04  
5.03  
5.02  
4.96  
4.96  
4.94  
4.94  
4.62  
4.60  
4.59  
4.57  
3.21  
2.49

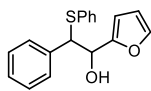

**6d**

<sup>1</sup>H NMR, 400 MHz, CDCl<sub>3</sub>

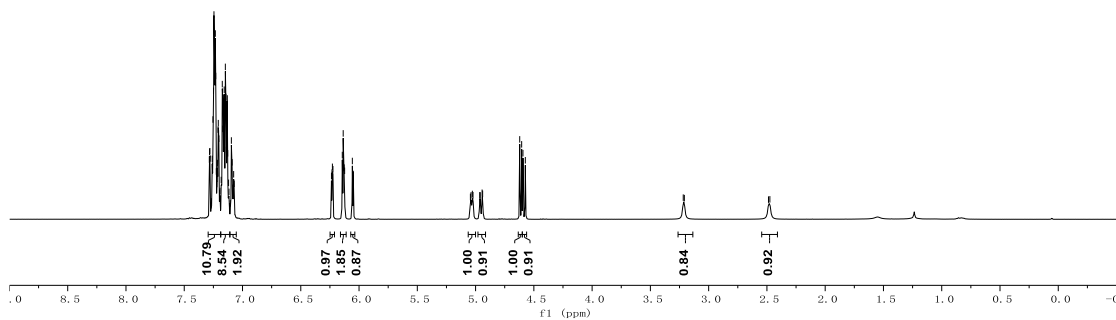

153.09  
152.56  
141.91  
138.94  
137.90  
134.04  
133.39  
132.80  
132.34  
128.81  
128.78  
128.66  
128.37  
128.14  
128.12  
127.70  
127.56  
127.37  
127.35  
110.23  
110.10  
108.23  
108.16  
77.32  
77.00  
76.68  
70.36  
70.24  
60.35  
58.71

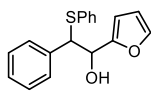

**6d**

<sup>13</sup>C NMR, 101 MHz, CDCl<sub>3</sub>

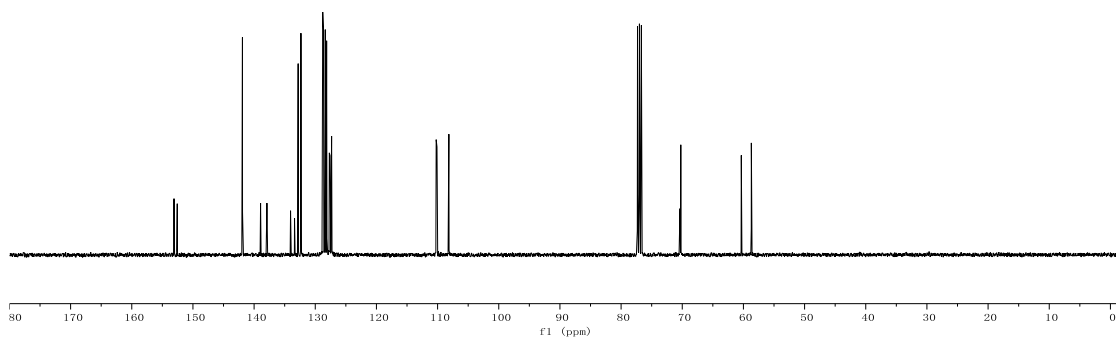

7.56  
7.55  
7.54  
7.54  
7.53  
7.53  
7.52  
7.52  
7.51  
7.44  
7.38  
7.38  
7.38  
7.37  
7.36  
7.36  
7.35  
7.35  
7.34  
7.34  
7.34  
7.33  
7.33  
7.32  
7.31  
7.31  
7.27  
7.26  
7.25  
7.25  
7.24  
7.24  
7.24  
7.23  
7.23  
7.22  
7.22  
7.19  
7.19  
7.19  
7.18  
7.17  
7.17  
7.15  
7.15  
7.12  
7.11  
7.09  
7.09  
7.07  
7.07  
7.07  
7.06  
7.06  
7.05  
7.03  
7.03  
7.01  
7.00  
6.99  
6.98  
6.91  
6.90  
6.89  
6.87  
6.87  
6.86  
6.85  
6.85  
5.19  
4.78  
1.47  
1.43

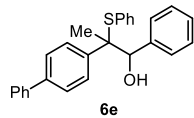

$^1\text{H NMR}$ , 400 MHz,  $\text{CDCl}_3$

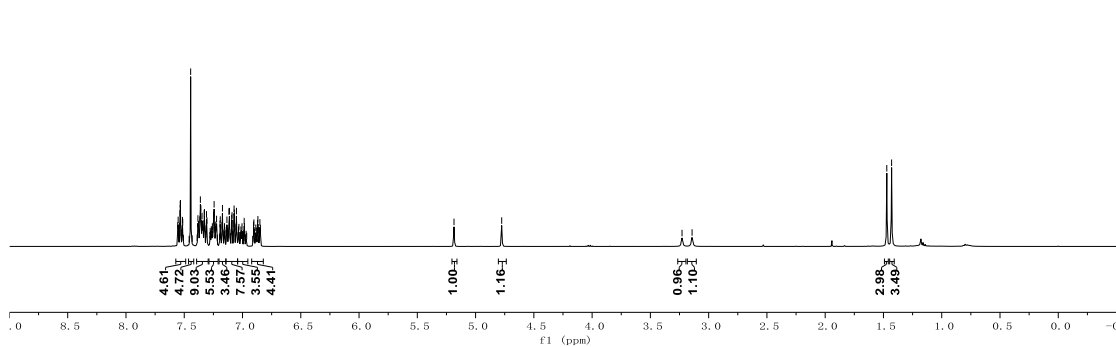

141.51  
140.41  
140.28  
139.63  
139.49  
138.96  
138.64  
138.60  
136.99  
136.29  
131.30  
130.90  
129.06  
128.94  
128.80  
128.75  
128.68  
128.63  
128.53  
128.34  
128.34  
127.83  
127.73  
127.35  
127.33  
127.31  
127.19  
126.94  
126.83  
126.19  
126.08  
79.54  
78.66  
77.32  
77.00  
76.68  
62.60  
60.30  
22.89  
18.78

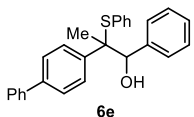

$^{13}\text{C NMR}$ , 101 MHz,  $\text{CDCl}_3$

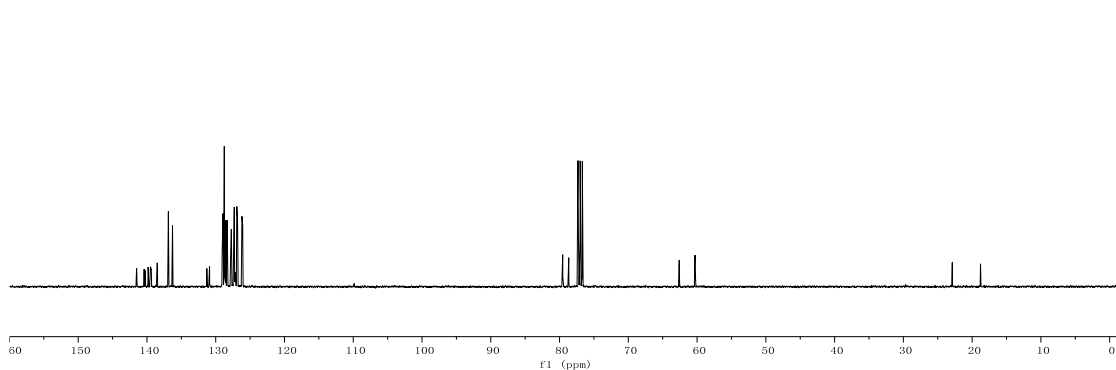



7.51  
7.51  
7.51  
7.49  
7.49  
7.41  
7.39  
7.36  
7.36  
7.35  
7.34  
7.34  
7.34  
7.33  
7.33  
7.33  
7.32  
7.32  
7.31  
7.31  
7.30  
7.30  
7.27  
7.27  
7.25  
7.25  
7.25  
7.23  
7.23  
7.21  
7.21  
7.20  
7.20  
7.19  
7.19  
7.18  
7.18  
7.18  
7.17  
7.17  
7.17  
7.16  
7.15  
7.13  
7.12  
7.12  
7.11  
7.11  
7.01  
7.01  
6.99  
6.99  
6.95  
6.94  
6.93  
6.93  
6.87  
6.87  
6.86  
6.86  
6.82  
6.81  
6.80  
6.80  
6.79  
6.50  
6.49  
6.49  
6.48  
6.48  
5.15  
4.77  
1.56  
1.53

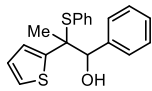

**6f**

<sup>1</sup>H NMR, 400 MHz, CDCl<sub>3</sub>

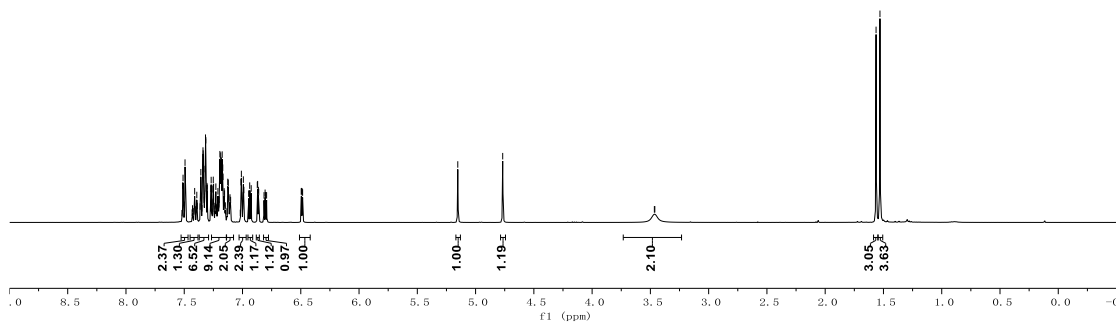

148.27  
144.28  
138.41  
138.05  
136.83  
136.48  
130.83  
130.59  
129.41  
129.11  
128.77  
128.58  
128.04  
127.93  
127.87  
127.84  
127.28  
126.80  
126.15  
126.10  
125.96  
125.63  
124.68  
79.16  
78.97  
77.32  
77.00  
76.68  
60.84  
59.18  
24.67  
20.61

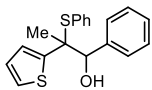

**6f**

<sup>13</sup>C NMR, 101 MHz, CDCl<sub>3</sub>

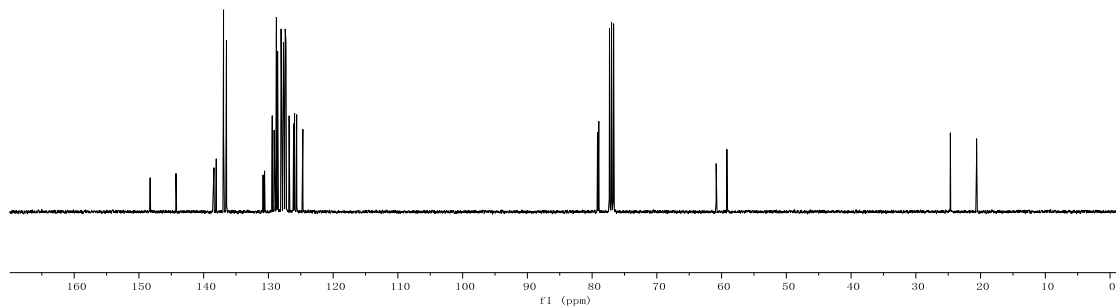

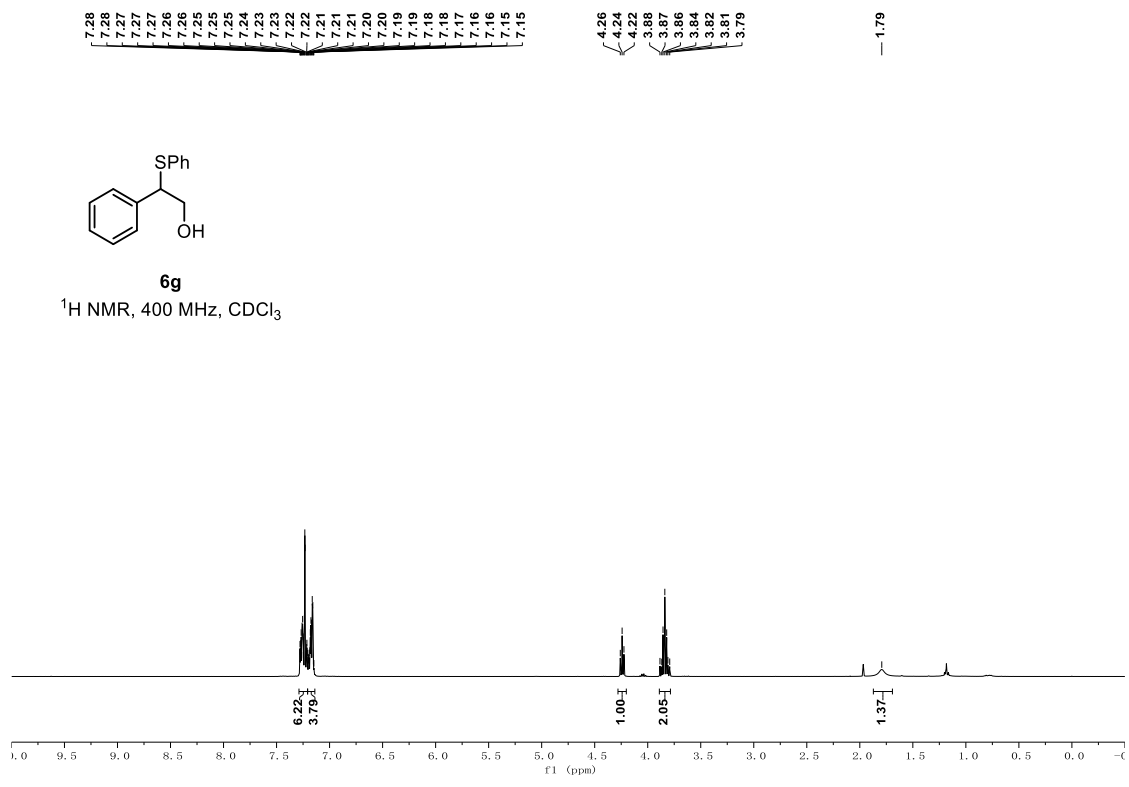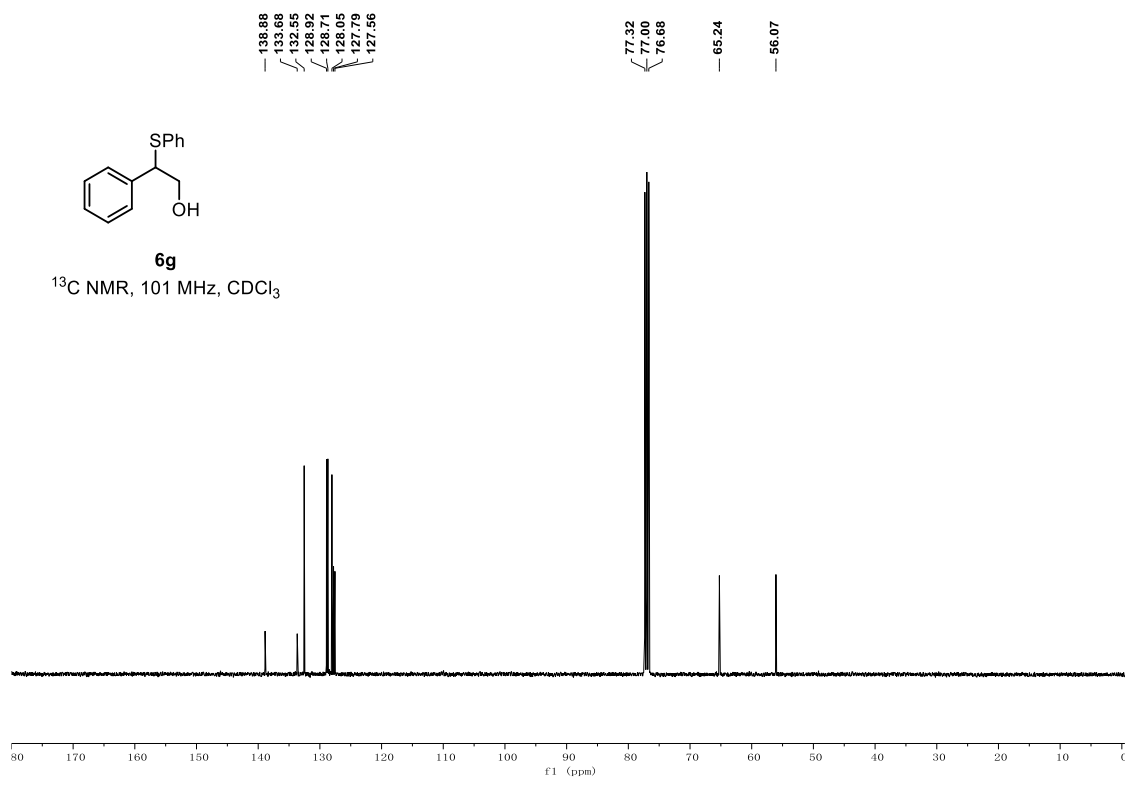

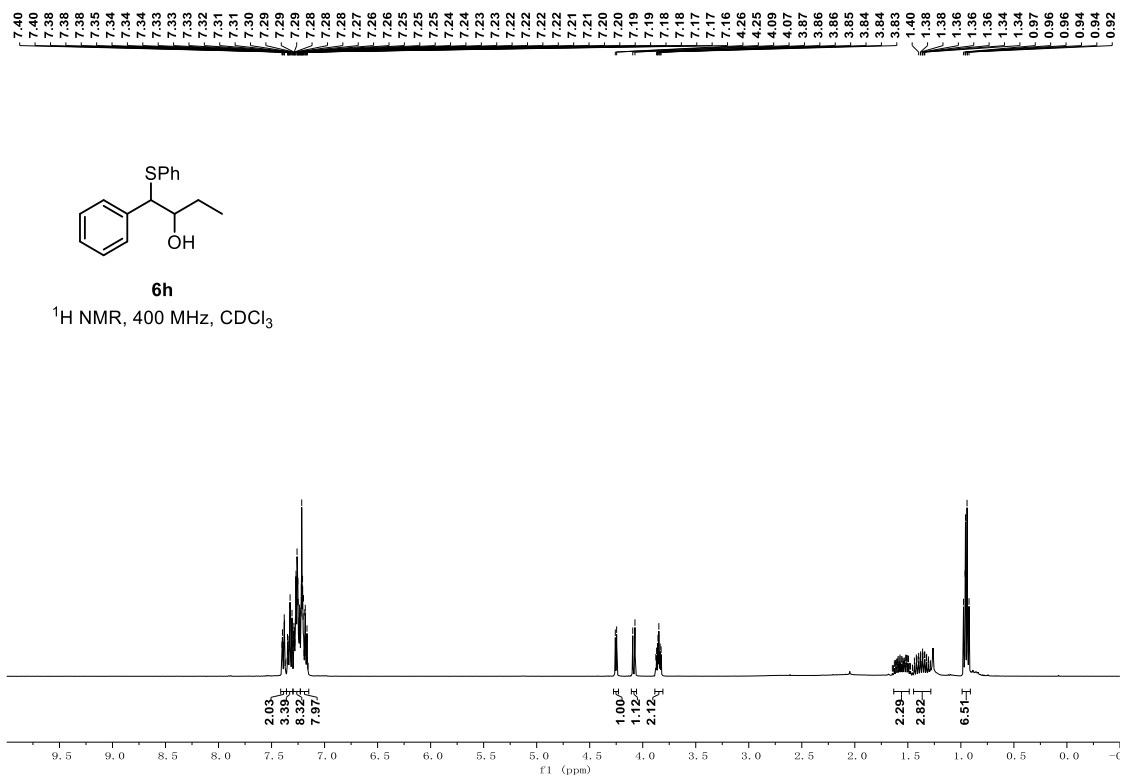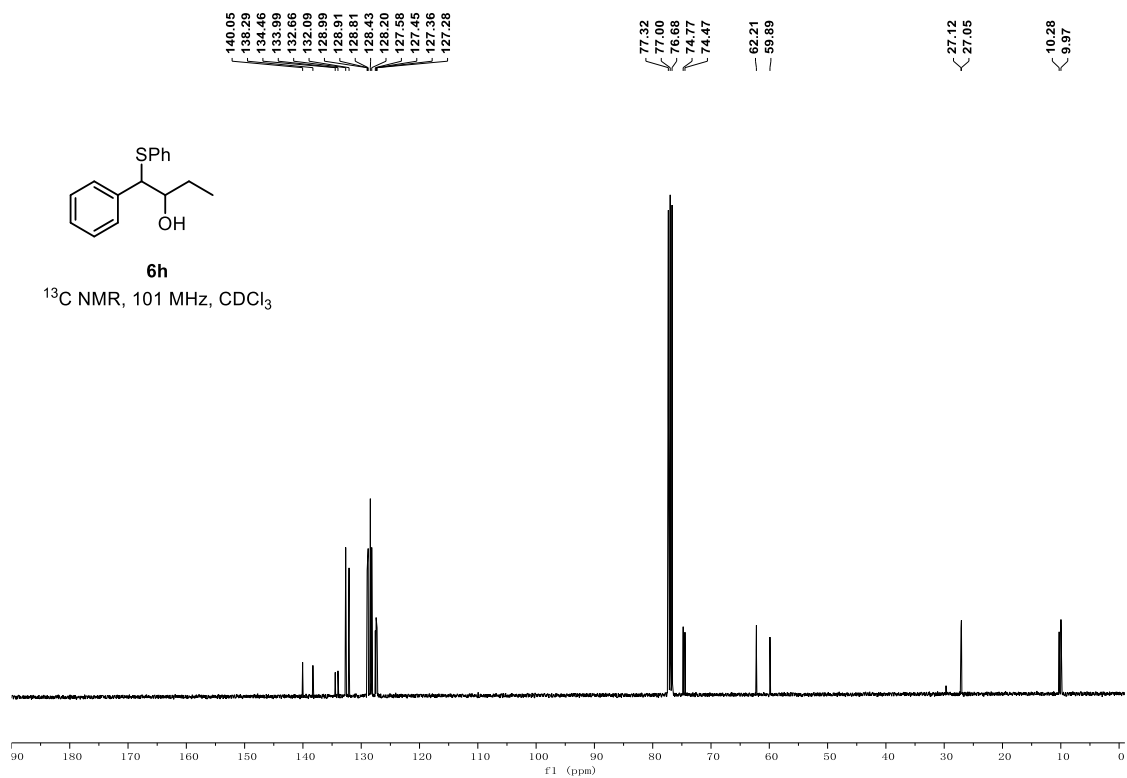

7.32  
7.30  
7.27  
7.26  
7.25  
7.23  
7.21  
7.19  
7.18  
7.16  
7.15  
7.14  
7.13  
7.12  
7.12  
7.11  
7.10  
7.09

4.16  
4.15  
4.01  
3.99  
3.87  
3.86  
3.86  
3.84  
3.84  
3.82  
3.82  
2.09  
1.97  
1.48  
1.46  
1.45  
1.44  
1.43  
1.42  
1.40  
1.39  
1.37  
1.35  
1.35  
1.34  
1.33  
1.32  
1.31  
1.31  
1.29  
1.28  
1.27  
1.26  
1.24  
1.23  
1.22  
1.22  
1.20  
1.20  
0.83  
0.80  
0.79  
0.77  
0.76  
0.74

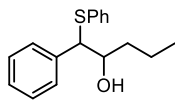

**6i**

$^1\text{H NMR}$ , 400 MHz,  $\text{CDCl}_3$

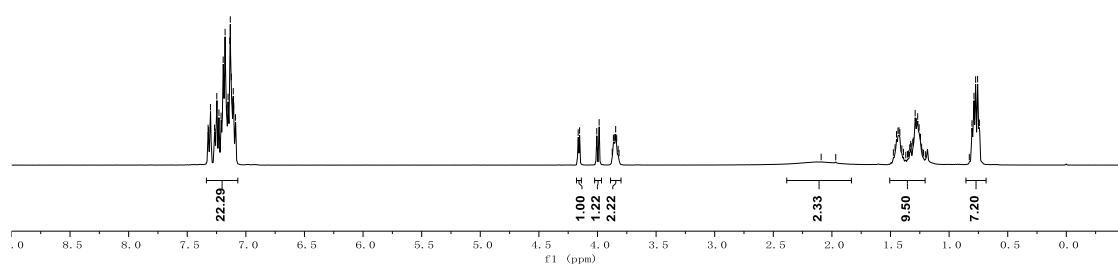

140.03  
138.29  
134.48  
134.05  
132.60  
129.00  
128.90  
128.81  
128.44  
128.42  
128.22  
127.96  
127.54  
127.54  
127.26

77.32  
77.00  
76.68  
73.31  
72.85

62.53  
60.23

36.28  
36.26

19.16  
18.96  
13.93  
13.90

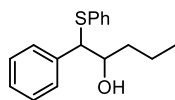

**6i**

$^{13}\text{C NMR}$ , 101 MHz,  $\text{CDCl}_3$

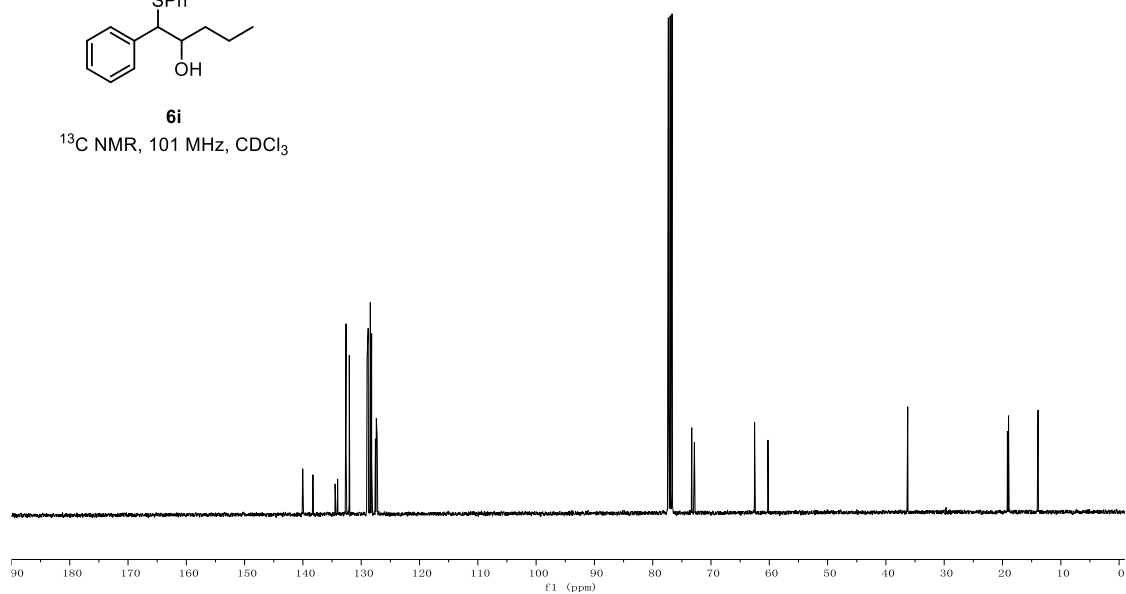

7.32  
7.31  
7.30  
7.27  
7.26  
7.25  
7.24  
7.23  
7.22  
7.21  
7.20  
7.20  
7.19  
7.19  
7.18  
7.17  
7.17  
7.16  
7.16  
7.15  
7.14  
7.14  
7.13  
7.13  
7.12  
7.12  
7.11  
7.10  
7.09  
7.08  
4.17  
4.16  
4.01  
3.99  
3.83  
3.83  
1.38  
1.37  
1.36  
1.36  
1.28  
1.27  
1.26  
1.26  
1.26  
1.23  
1.22  
1.21  
1.21  
1.20  
1.20  
1.19  
1.18  
1.18  
1.17  
1.17  
0.79  
0.78  
0.77  
0.76  
0.75  
0.73

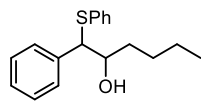

**6j**

<sup>1</sup>H NMR, 400 MHz, CDCl<sub>3</sub>

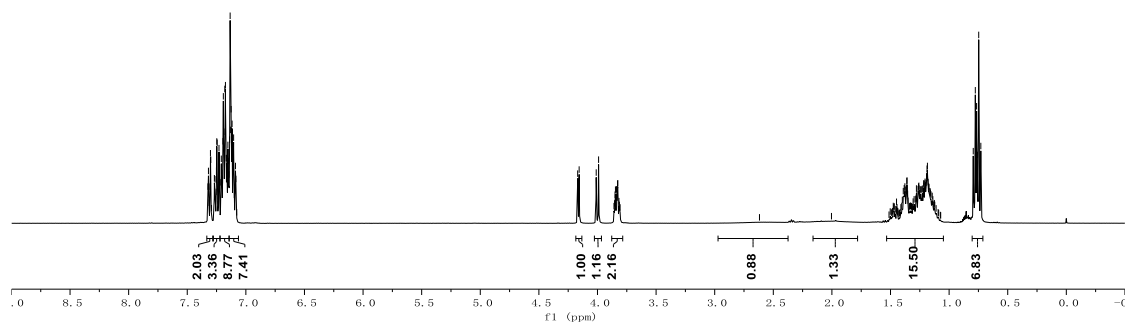

140.05  
138.29  
134.49  
134.04  
132.81  
132.05  
128.99  
128.90  
128.80  
128.43  
128.21  
127.56  
127.41  
127.35  
127.26

77.32  
77.00  
76.68  
73.52  
73.11

62.49  
60.19

33.87  
33.83  
28.10  
27.89  
22.57  
22.51

13.98  
13.95

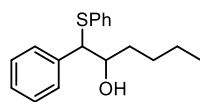

**6j**

<sup>13</sup>C NMR, 101 MHz, CDCl<sub>3</sub>

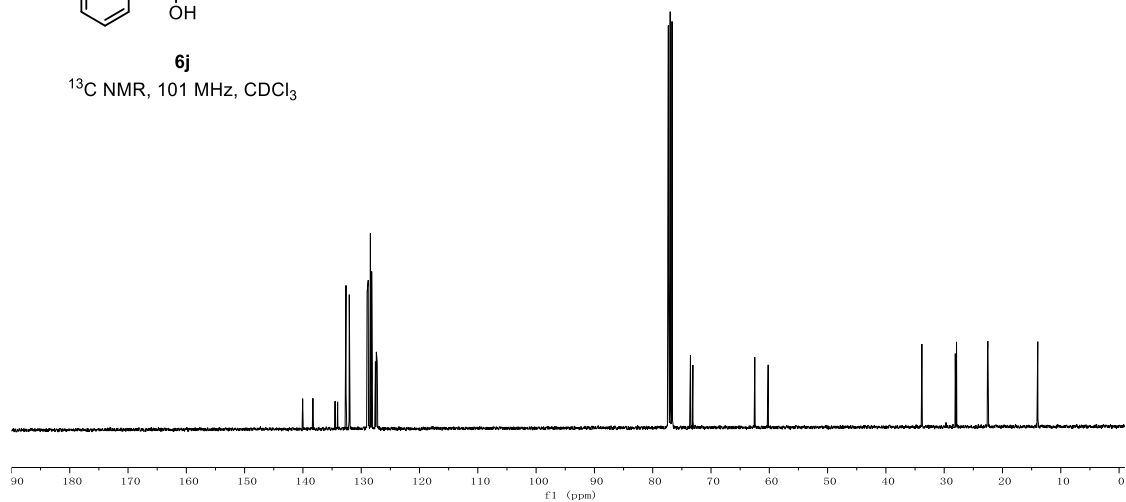

7.32  
7.31  
7.30  
7.27  
7.26  
7.25  
7.24  
7.23  
7.22  
7.21  
7.21  
7.21  
7.20  
7.20  
7.19  
7.19  
7.18  
7.18  
7.17  
7.16  
7.15  
7.15  
7.14  
7.14  
7.13  
7.13  
7.12  
7.12  
7.12  
7.11  
7.10  
7.10  
7.09  
7.08  
7.08  
4.15  
4.13  
3.99  
3.97  
3.95  
3.94  
3.93  
3.93  
3.91  
3.91  
1.29  
1.27  
1.26  
1.26  
1.25  
1.25  
1.23  
1.23  
1.23  
1.21  
1.18  
1.18  
0.80  
0.78  
0.77  
0.77  
0.76  
0.74

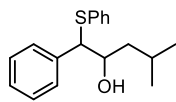

**6k**

$^1\text{H NMR}$ , 400 MHz,  $\text{CDCl}_3$

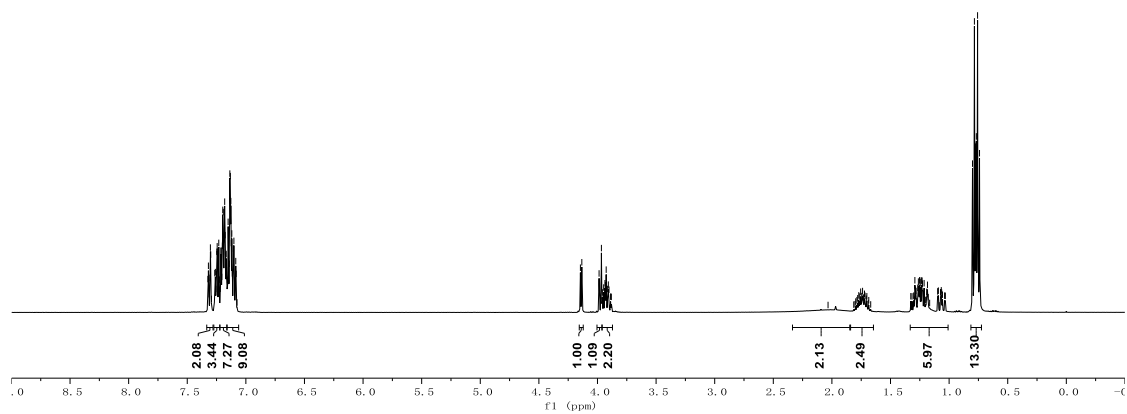

140.01  
138.26  
134.53  
134.11  
132.59  
131.97  
129.03  
128.89  
128.82  
128.45  
128.42  
128.23  
127.96  
127.51  
127.35  
127.23

77.32  
77.00  
76.68  
71.71  
71.19

62.95  
60.61

43.33  
43.26

24.81  
24.78  
23.68  
23.47  
21.76  
21.36

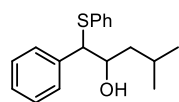

**6k**

$^{13}\text{C NMR}$ , 101 MHz,  $\text{CDCl}_3$

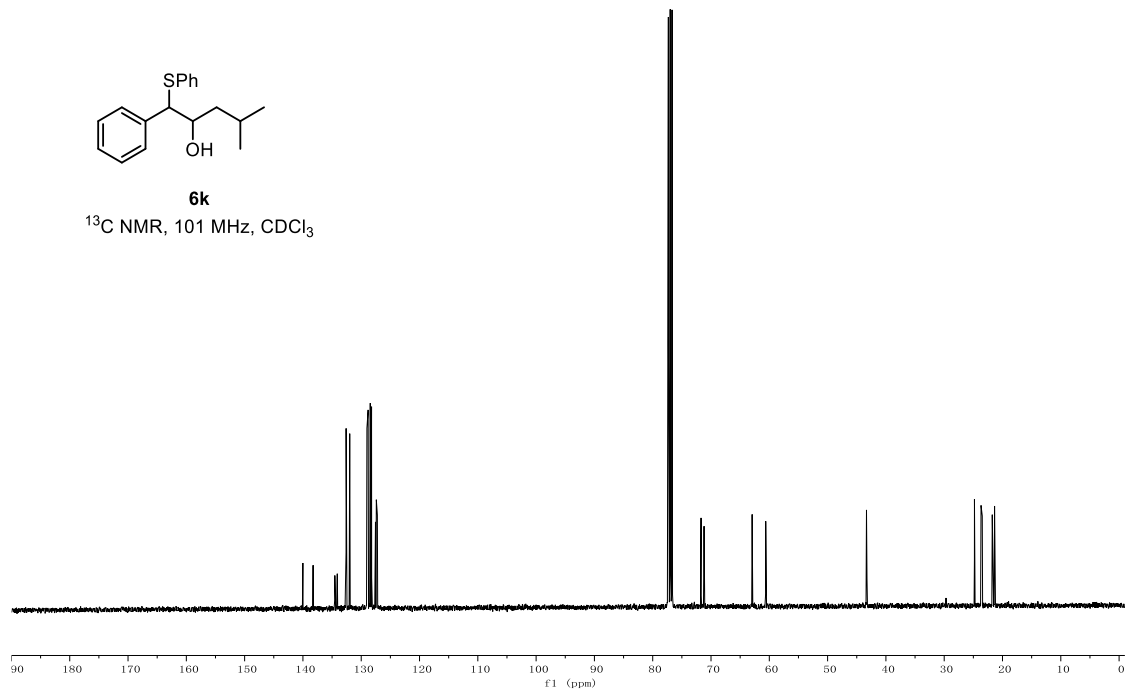

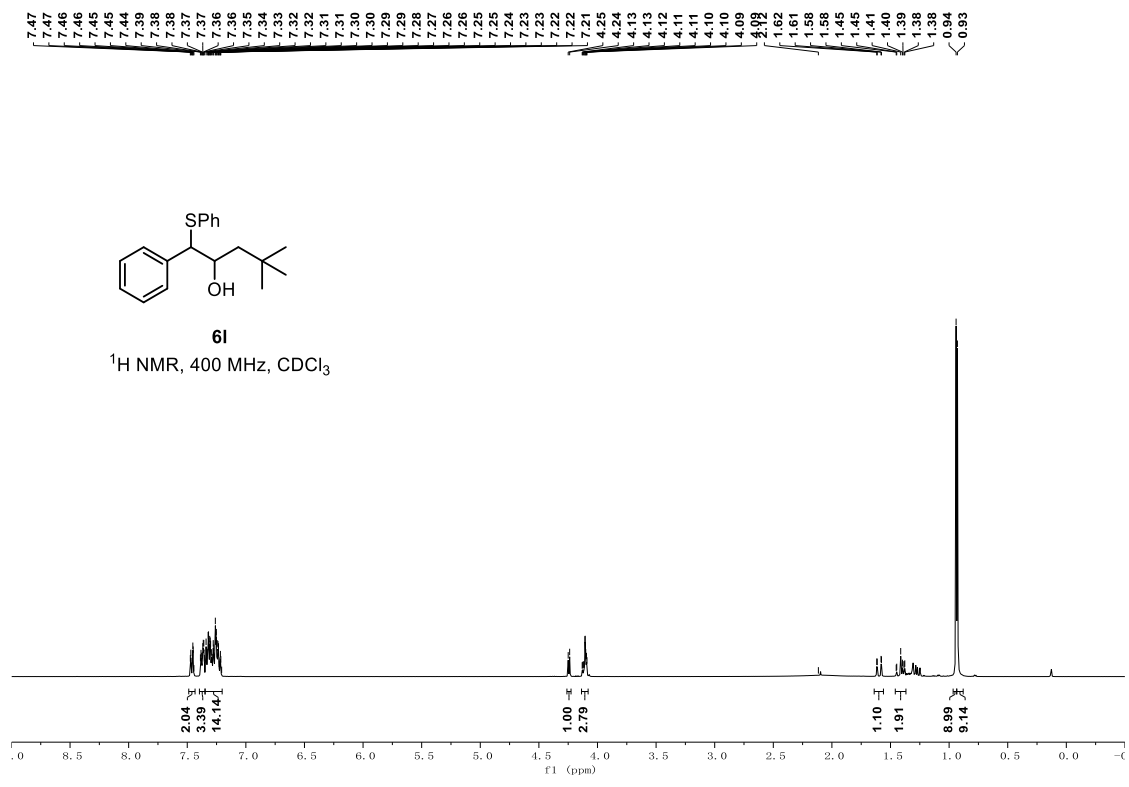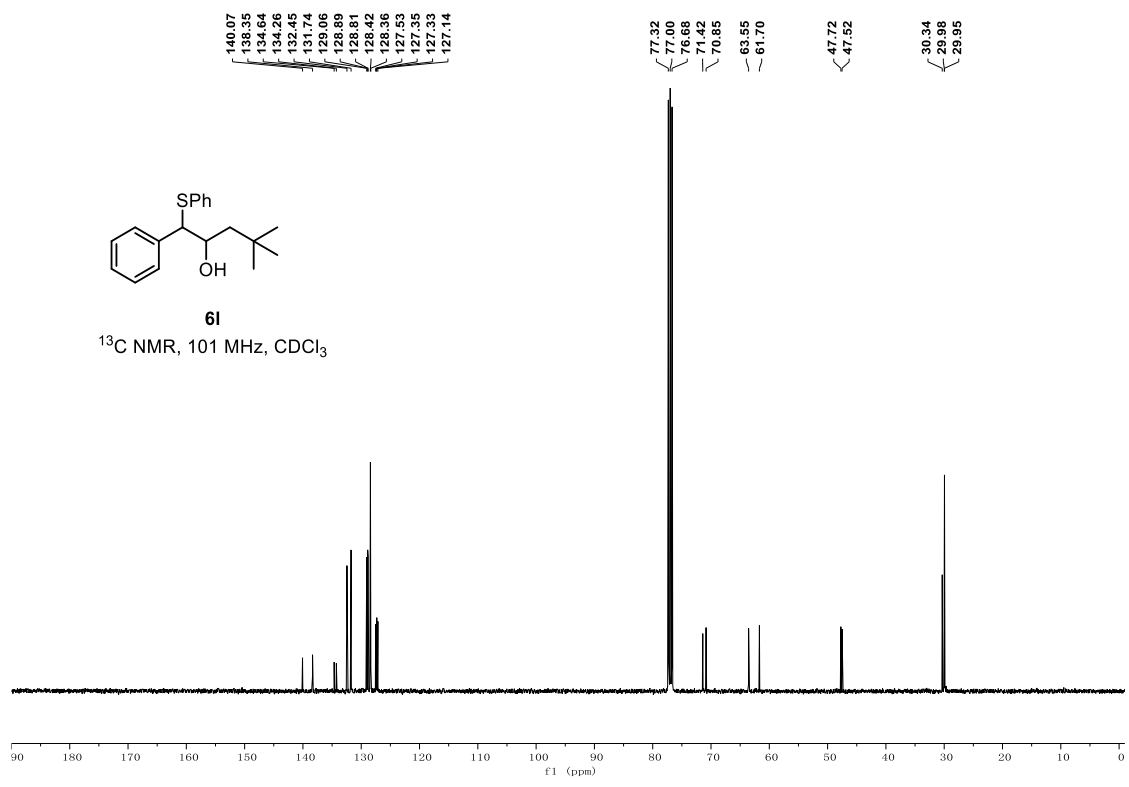

7.42  
7.41  
7.41  
7.40  
7.39  
7.35  
7.35  
7.34  
7.33  
7.32  
7.31  
7.30  
7.30  
7.29  
7.28  
7.27  
7.27  
7.26  
7.25  
7.24  
7.24  
7.23  
7.23  
7.22  
7.22  
7.21  
7.21  
7.20  
7.20  
7.19  
7.19  
7.18  
7.17  
7.16  
7.16  
7.15  
7.14  
7.14  
4.33  
4.31  
4.18  
4.15  
3.78  
3.76  
3.74  
3.63  
3.61  
3.59  
1.62  
1.79  
1.62  
1.61  
1.00  
0.98  
0.97  
0.95  
0.94  
0.92  
0.90  
0.89  
0.87  
0.85

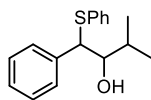

**6m**

<sup>1</sup>H NMR, 300 MHz, CDCl<sub>3</sub>

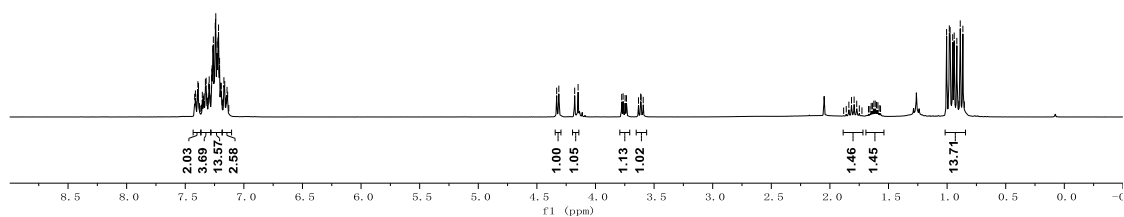

140.26  
138.38  
134.12  
133.81  
132.92  
132.49  
129.14  
128.91  
128.77  
128.46  
128.42  
128.06  
127.57  
127.50  
127.45  
127.29

77.42  
77.00  
76.58

60.70  
57.65

30.51  
29.76

20.56  
19.53  
17.52  
14.82

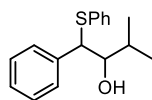

**6m**

<sup>13</sup>C NMR, 75 MHz, CDCl<sub>3</sub>

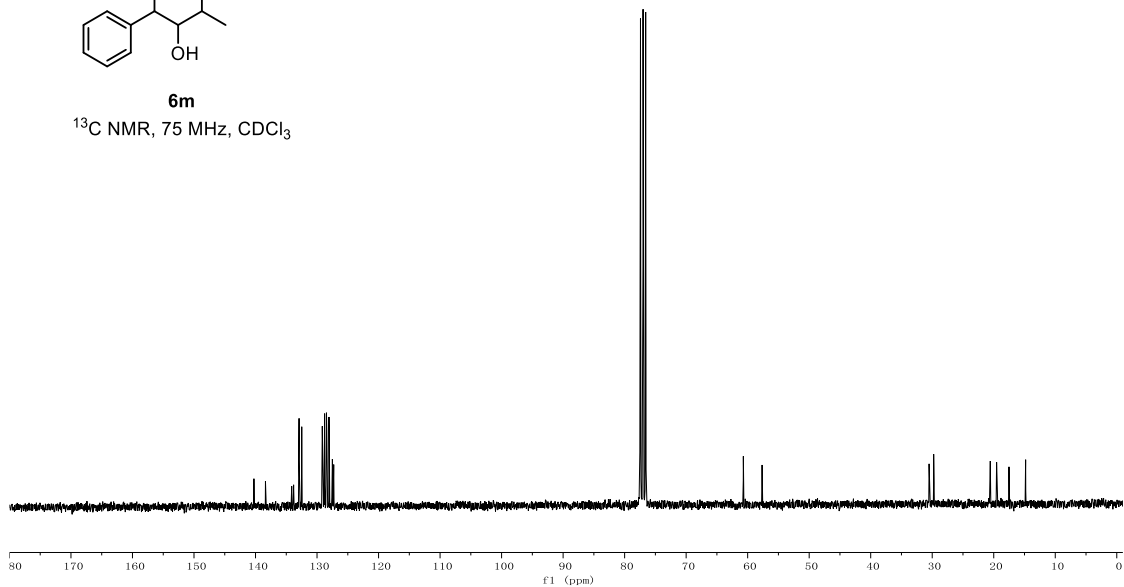



7.23  
7.22  
7.21  
7.20  
7.19  
7.18  
7.17  
7.16  
7.15  
7.14  
7.13  
7.12  
7.10  
7.08  
7.07  
7.06  
6.93  
6.92  
6.91  
6.91  
4.06  
4.04  
4.04  
4.03  
4.02  
3.98  
3.97  
3.96  
3.95  
3.95  
2.88  
2.86  
2.85  
2.83  
2.71  
2.70  
2.68  
2.66  
2.64  
2.47  
2.34  
1.24  
1.23  
1.21  
1.19

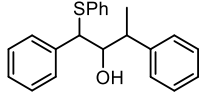

**6n**

<sup>1</sup>H NMR, 400 MHz, CDCl<sub>3</sub>

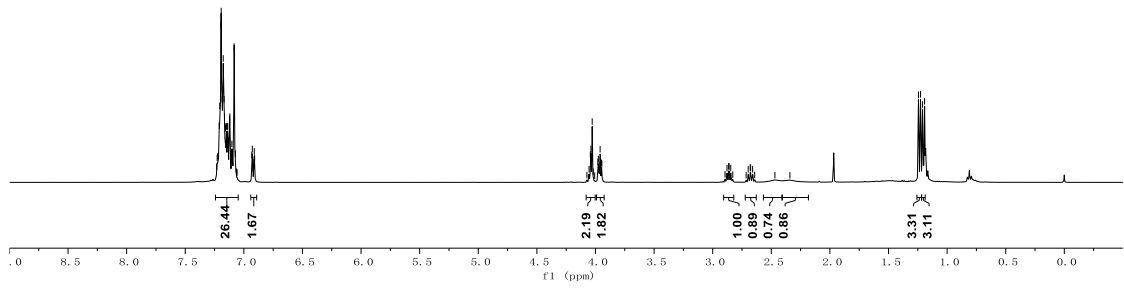

144.69  
144.10  
140.66  
137.33  
134.08  
134.01  
132.52  
132.09  
129.56  
128.83  
128.71  
128.58  
128.50  
128.44  
128.23  
128.02  
127.90  
127.68  
127.58  
127.37  
127.23  
126.58  
126.49

78.81  
77.32  
77.00  
76.68  
76.11

59.53  
56.42

42.91  
42.22

18.48  
14.94

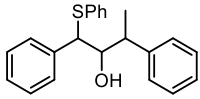

**6n**

<sup>13</sup>C NMR, 101 MHz, CDCl<sub>3</sub>

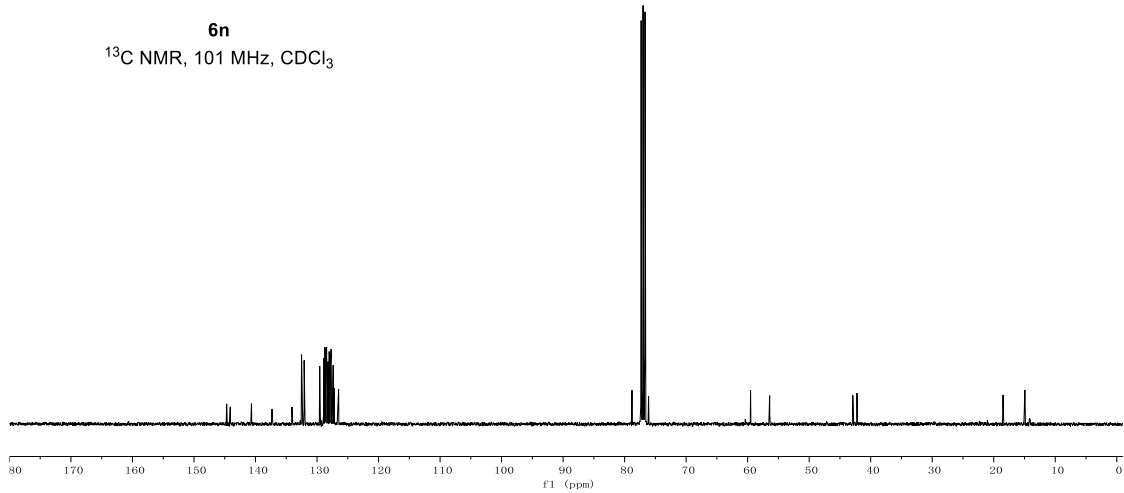

7.42  
7.41  
7.39  
7.38  
7.35  
7.34  
7.33  
7.32  
7.31  
7.30  
7.29  
7.28  
7.27  
7.26  
7.25  
7.24  
7.23  
7.22  
7.21  
7.20  
7.19  
7.18  
7.17  
4.37  
4.27  
4.24  
3.65  
3.64  
1.72  
1.71  
1.70  
1.69  
1.68  
1.67  
1.66  
1.62  
1.60  
1.58  
1.57  
1.57  
1.35  
1.34  
1.33  
1.32  
1.31  
1.19  
1.15  
1.12  
1.11  
1.10  
1.09  
1.08  
1.07  
1.06

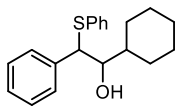

**6o**

<sup>1</sup>H NMR, 300 MHz, CDCl<sub>3</sub>

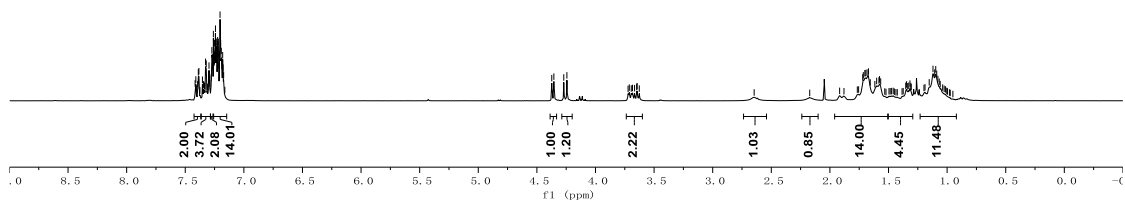

140.40  
138.40  
134.28  
134.14  
132.50  
132.34  
129.13  
128.90  
128.75  
128.48  
128.09  
127.53  
127.37  
127.29  
127.27  
77.75  
77.42  
77.00  
76.85  
76.38  
39.94  
39.73  
30.56  
29.66  
27.74  
26.35  
26.31  
25.98  
25.91  
25.82  
25.76

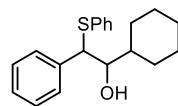

**6o**

<sup>13</sup>C NMR, 75 MHz, CDCl<sub>3</sub>

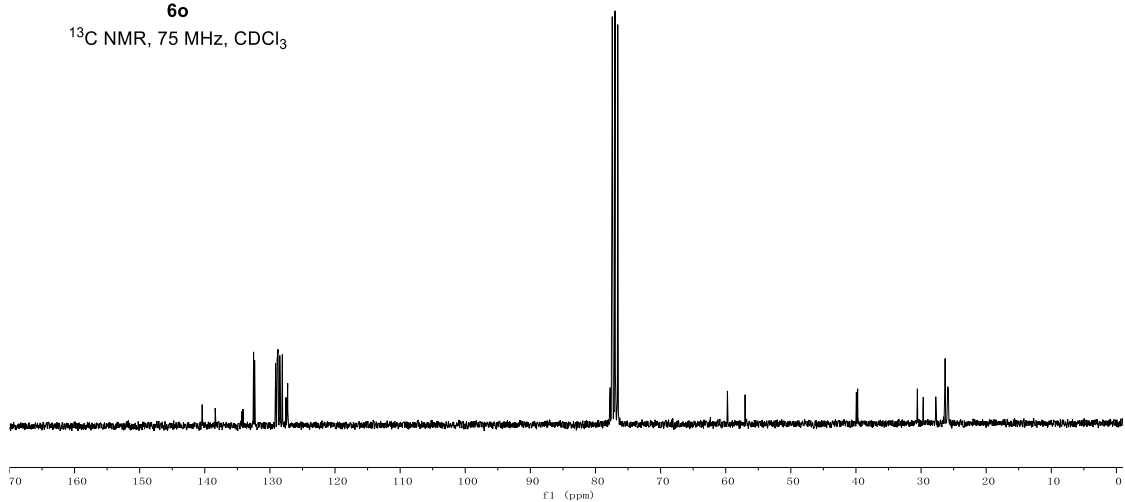

7.63  
7.63  
7.62  
7.61  
7.32  
7.32  
7.30  
7.30  
7.26

3.04  
3.02  
3.01  
2.42  
2.29  
2.29  
2.28  
2.27  
2.27  
2.26  
2.26  
2.25

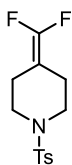

**9a**

$^1\text{H NMR}$ , 400 MHz,  $\text{CDCl}_3$

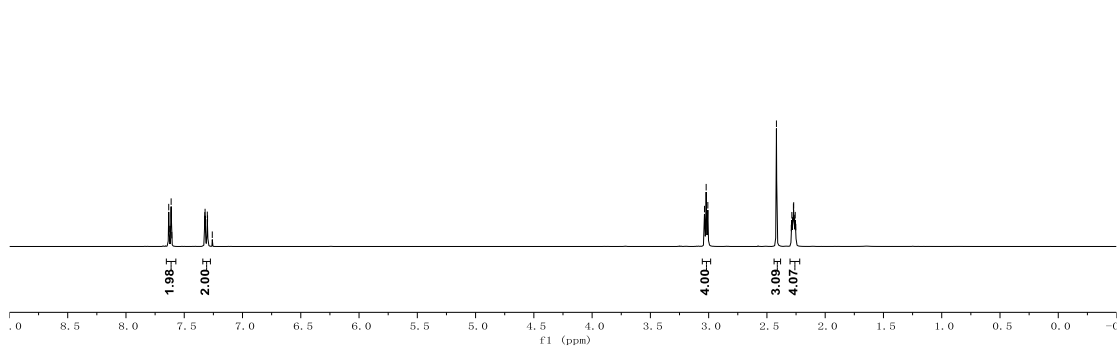

154.04  
151.23  
148.42  
143.67  
133.15  
129.67  
127.56

83.85  
83.65  
83.44  
77.32  
77.06  
76.86

46.22  
46.20  
46.18

23.64  
23.62  
23.60  
21.47

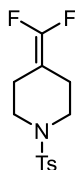

**9a**

$^{13}\text{C NMR}$ , 101 MHz,  $\text{CDCl}_3$

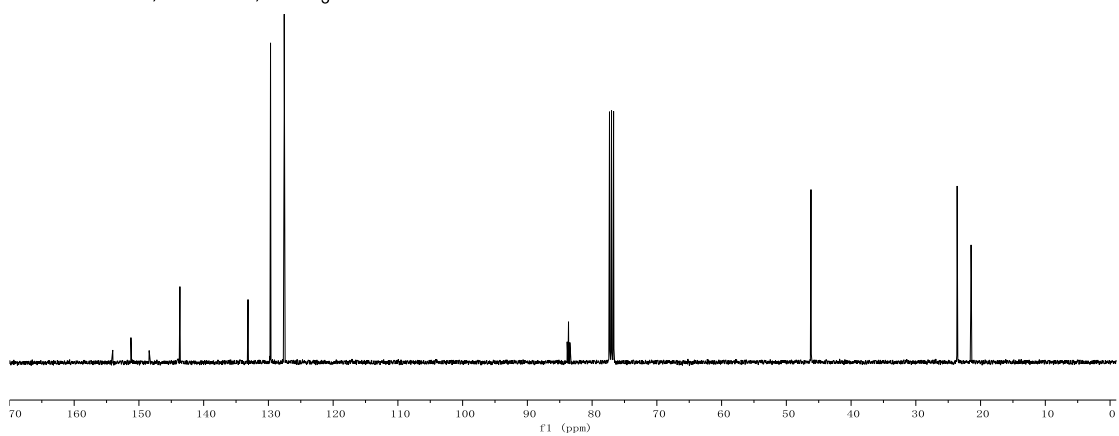

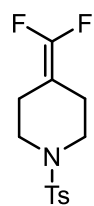

**9a**  
<sup>19</sup>F NMR, 377 MHz, CDCl<sub>3</sub>

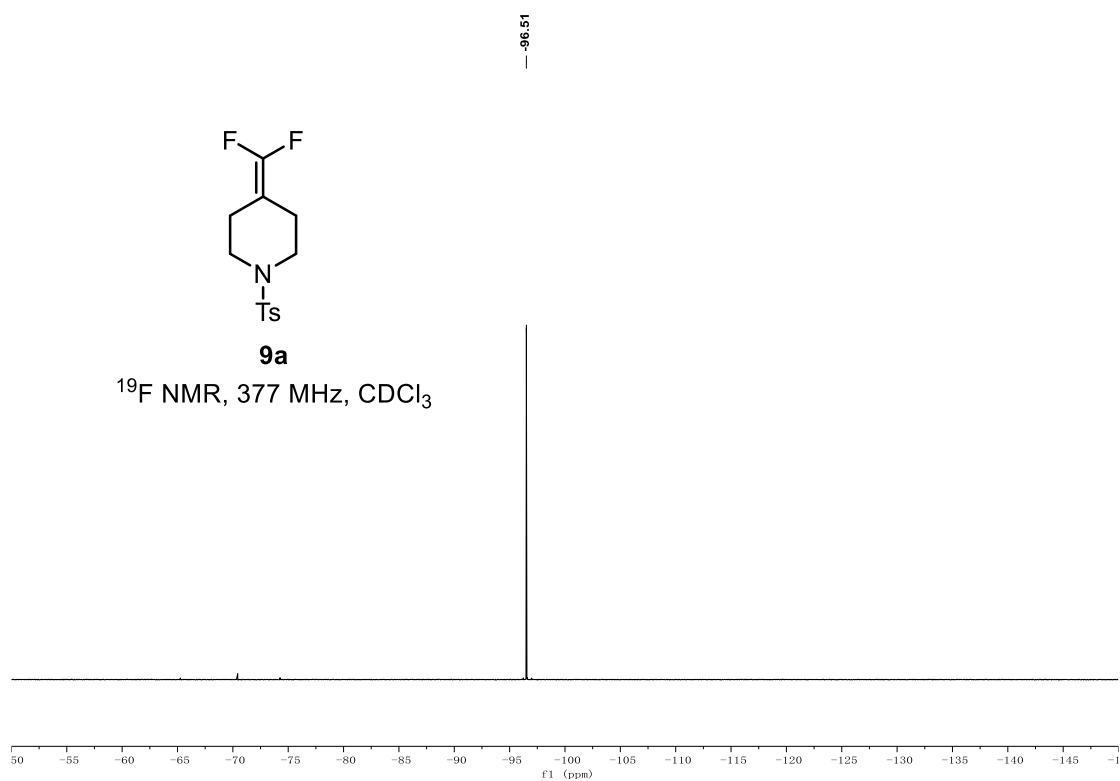

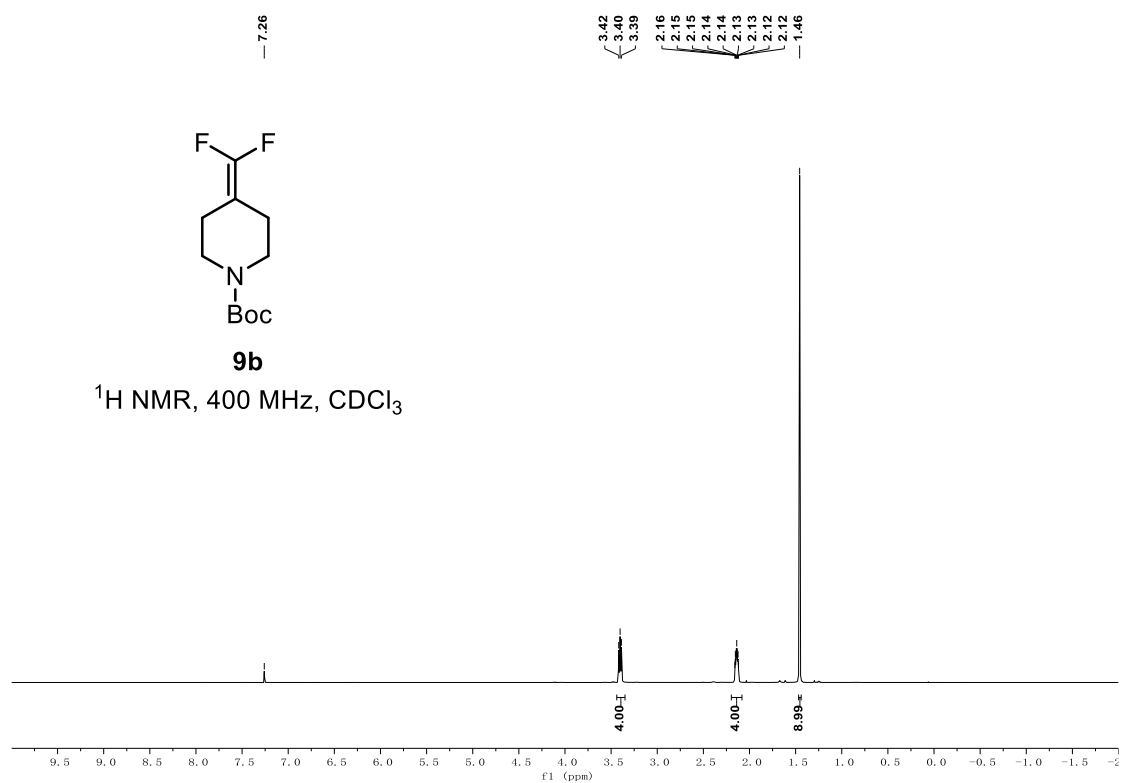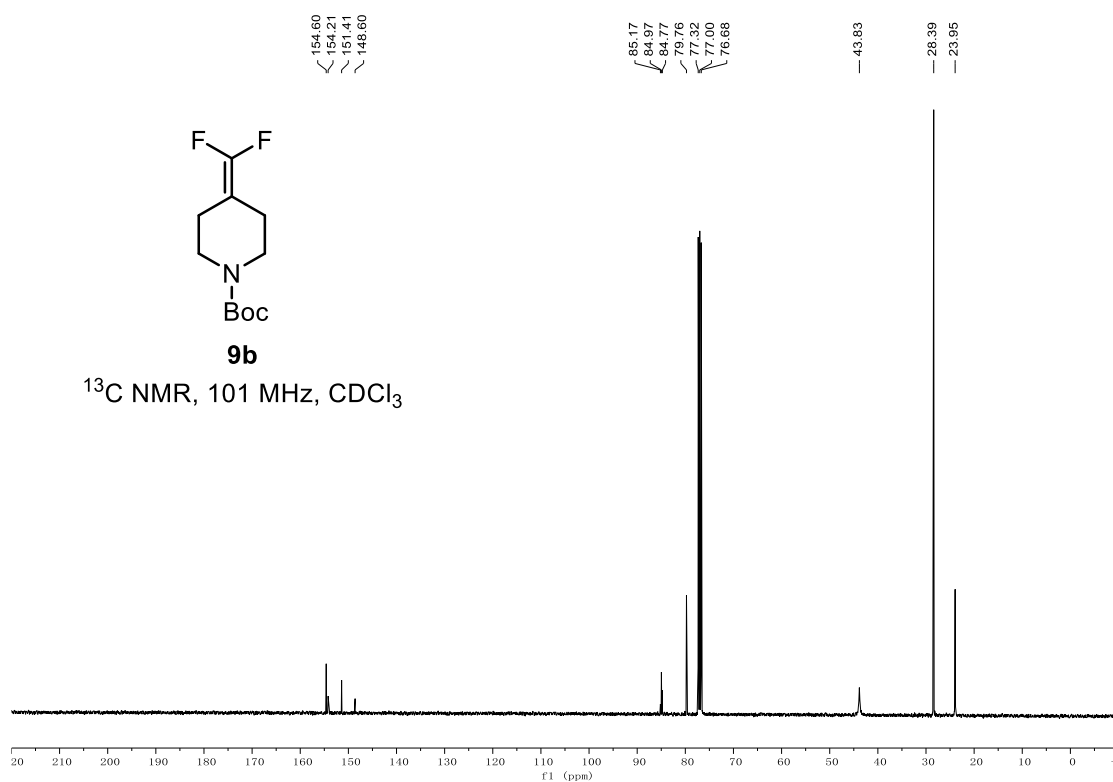

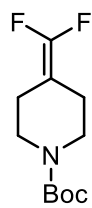

**9b**

$^{19}\text{F}$  NMR, 377 MHz,  $\text{CDCl}_3$

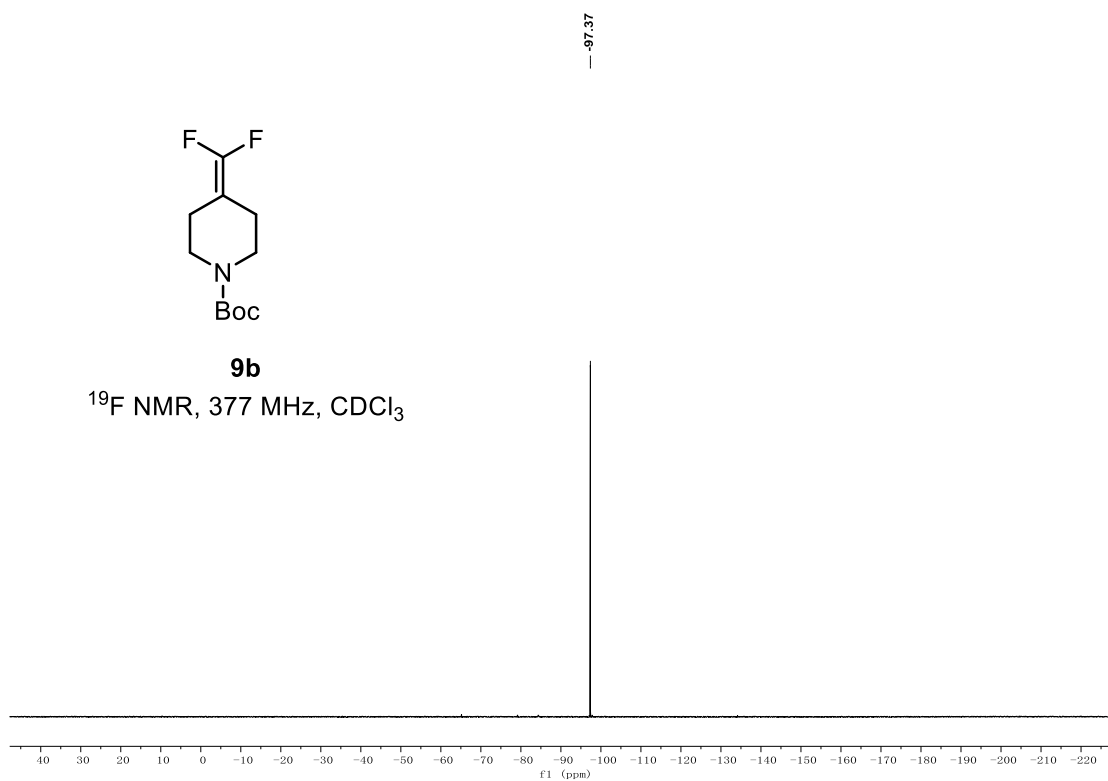

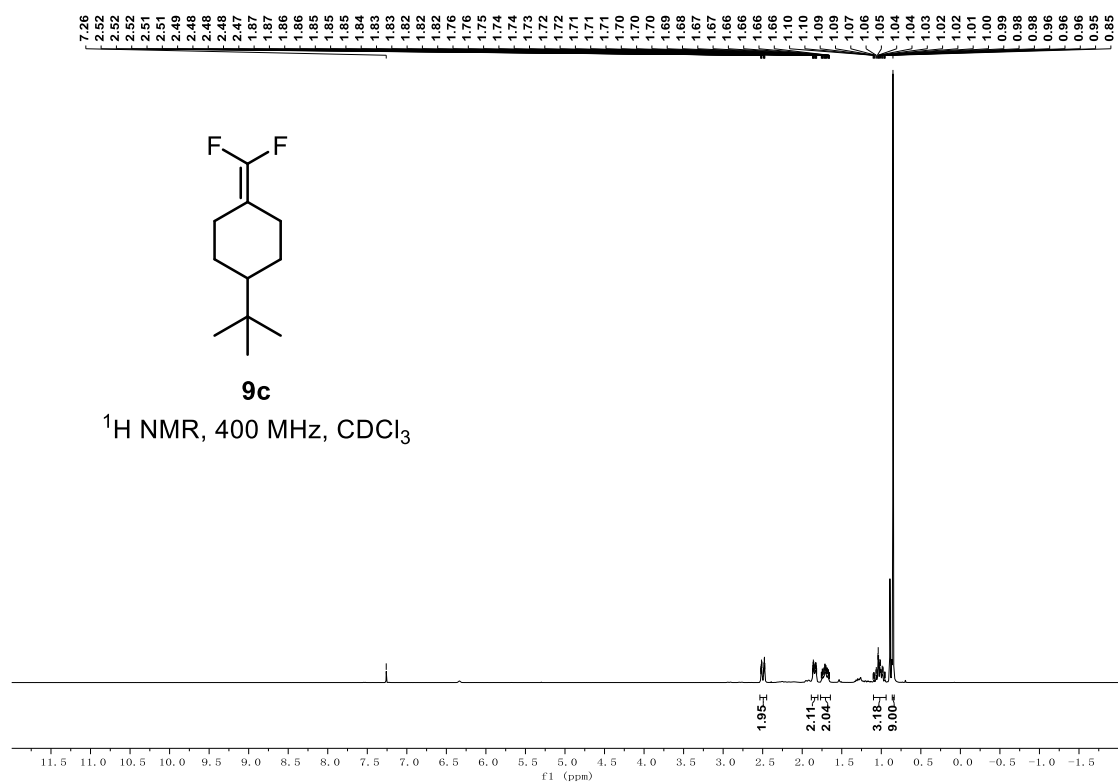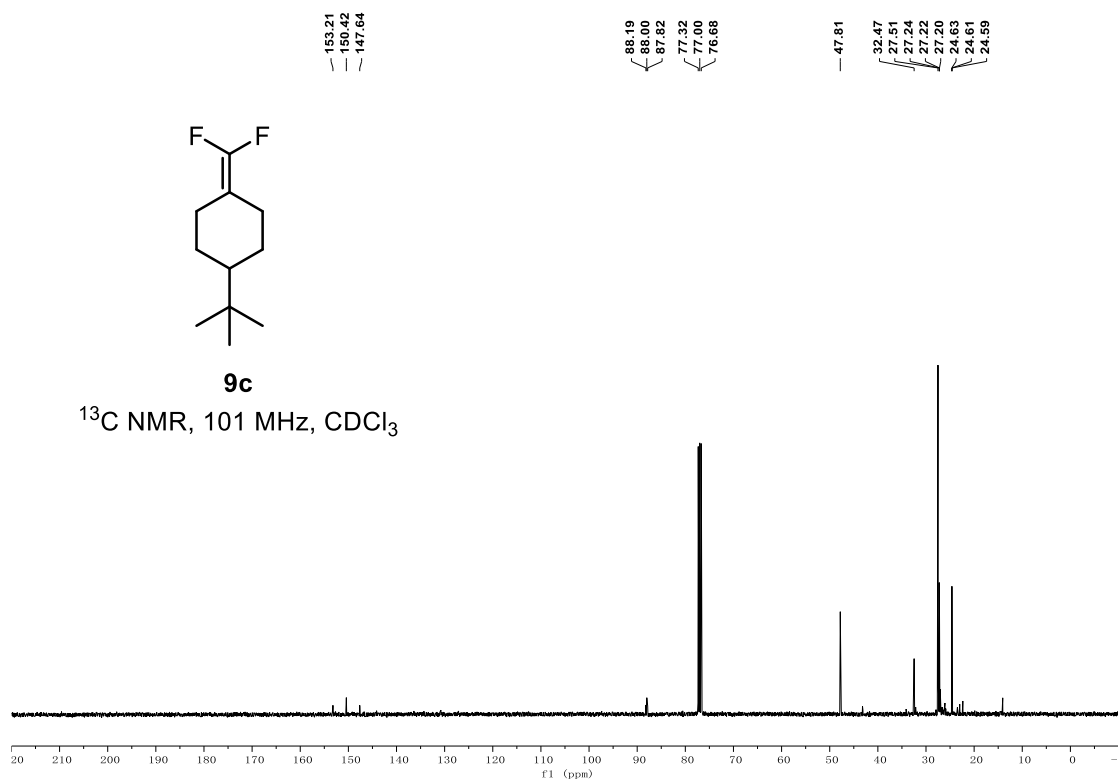

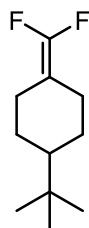

**9c**

$^{19}\text{F}$  NMR, 377 MHz,  $\text{CDCl}_3$

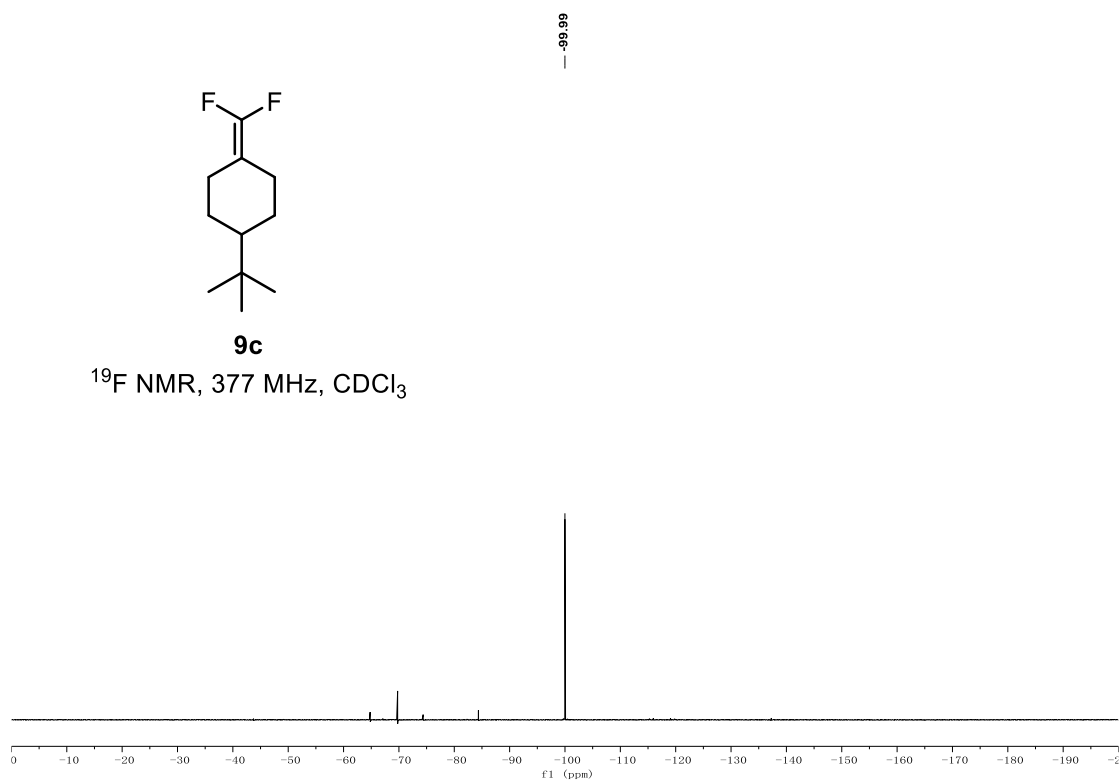



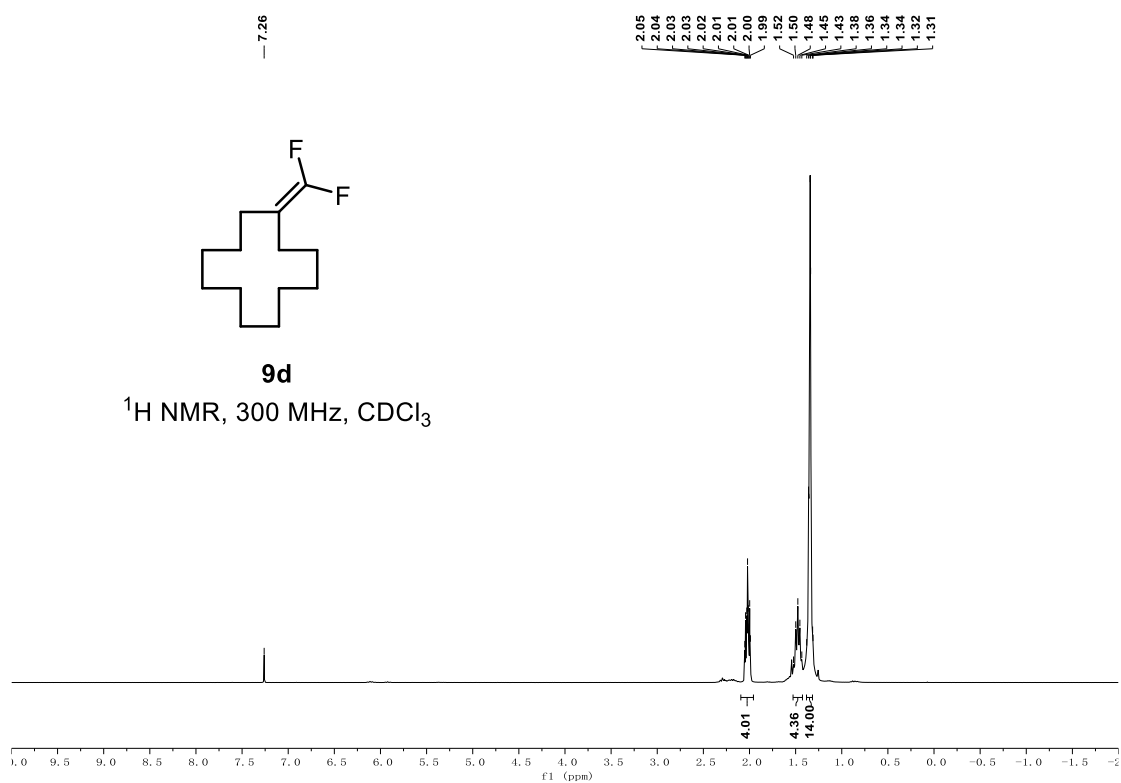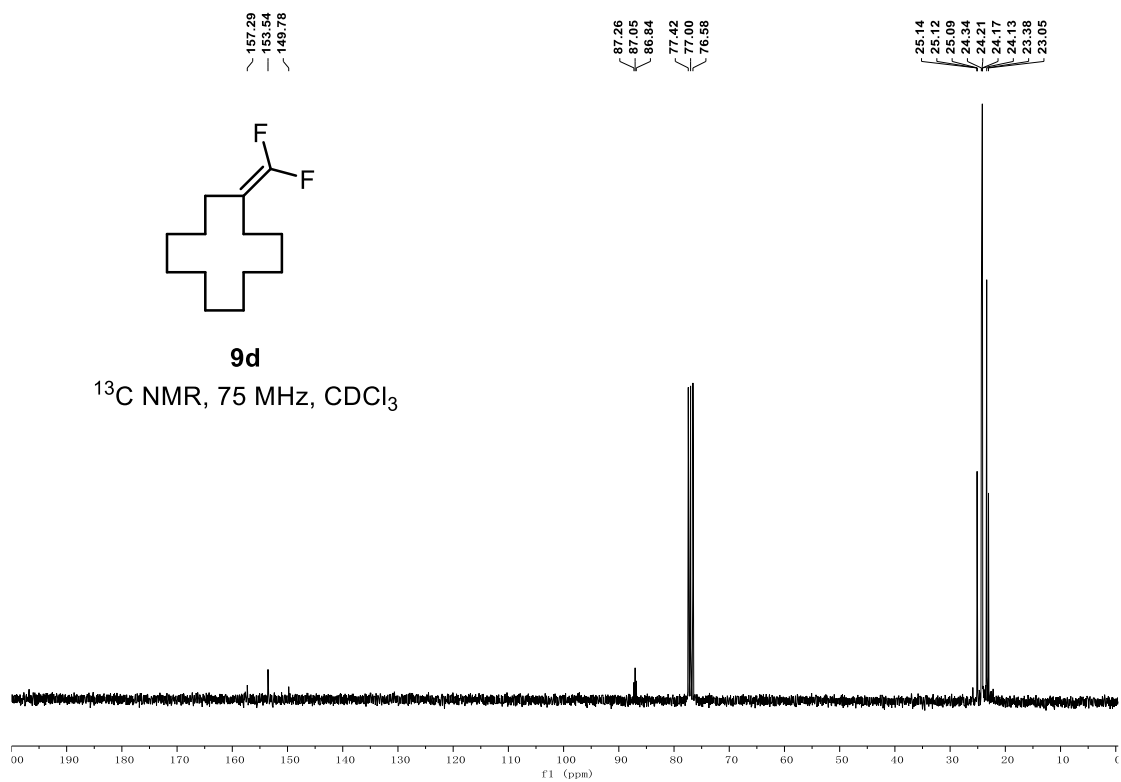

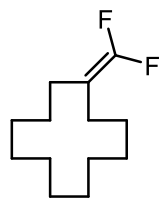

**9d**

$^{19}\text{F}$  NMR, 282 MHz,  $\text{CDCl}_3$

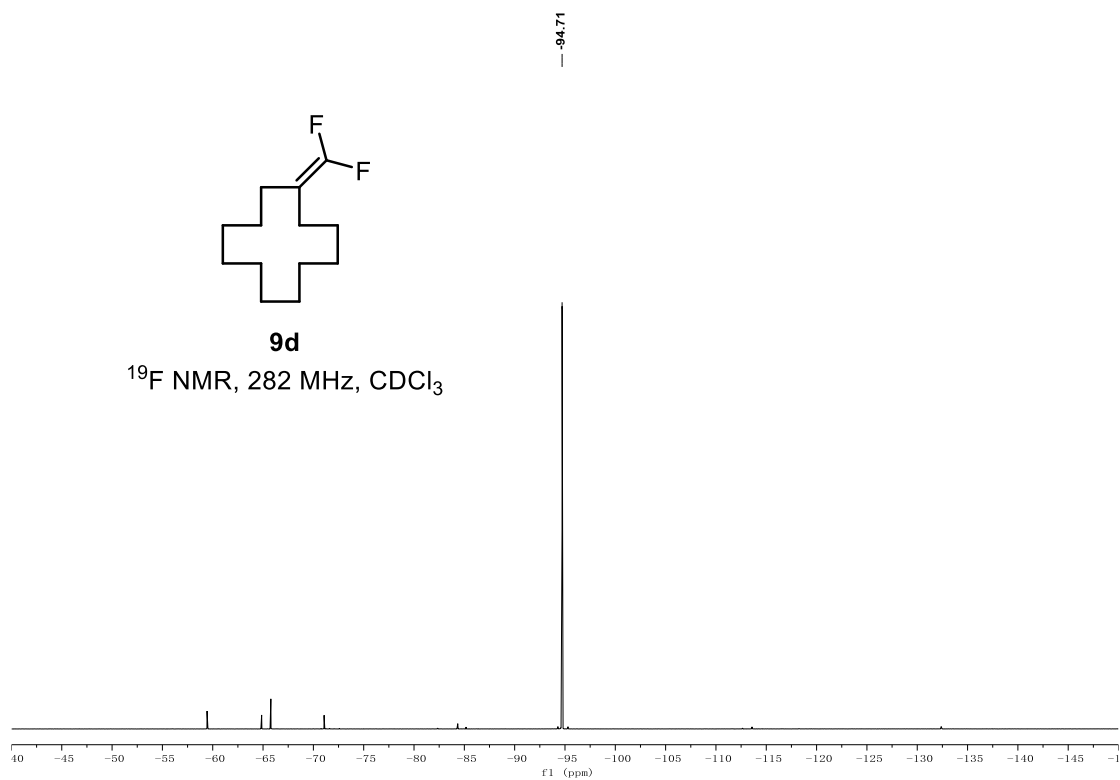

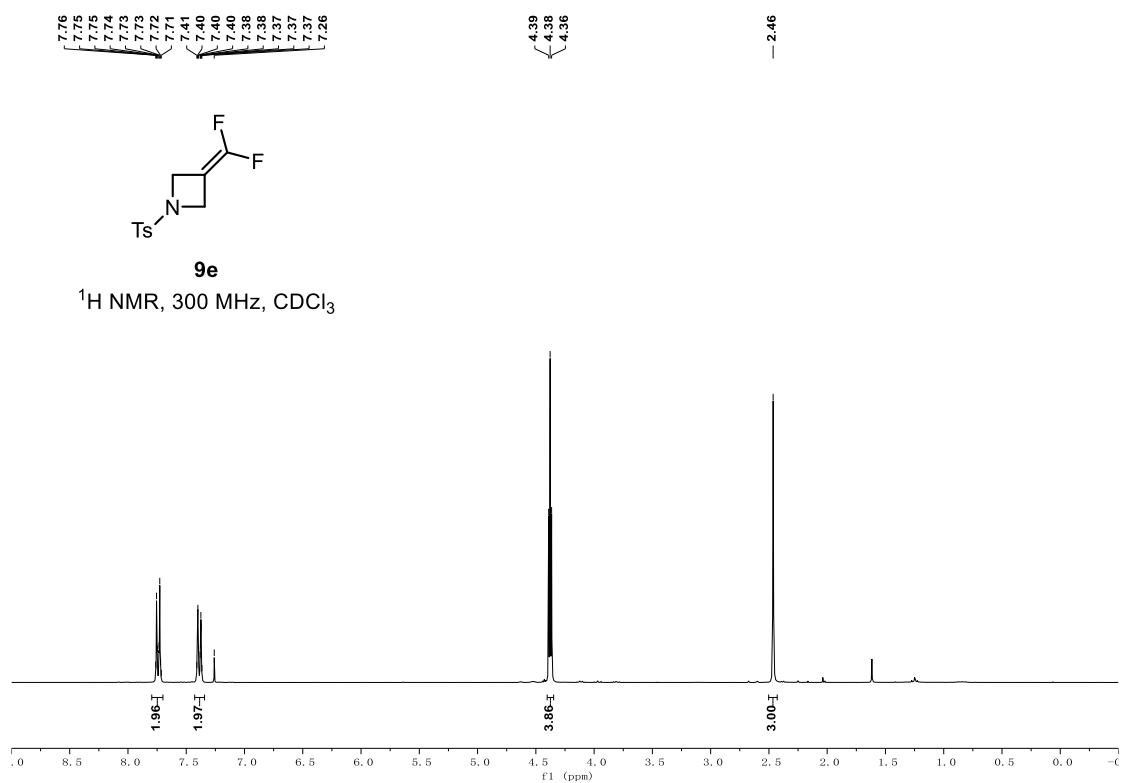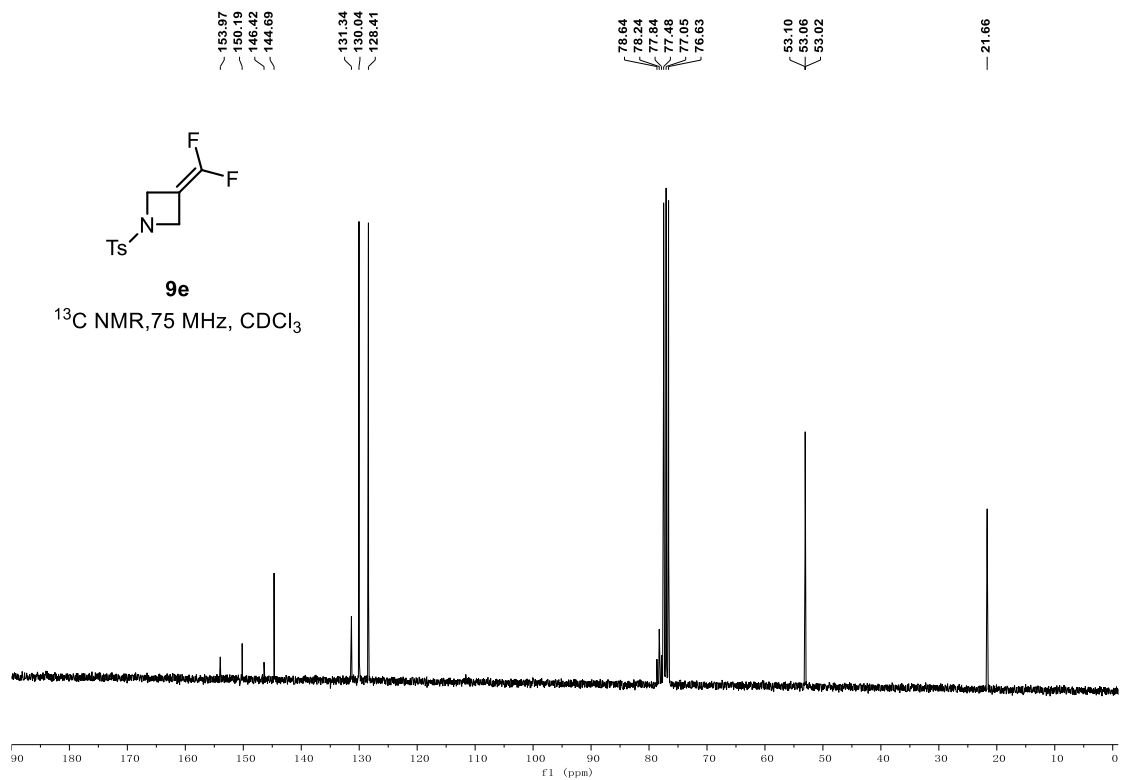

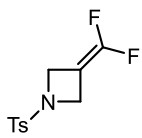

**9e**

<sup>19</sup>F NMR, 282 MHz, CDCl<sub>3</sub>

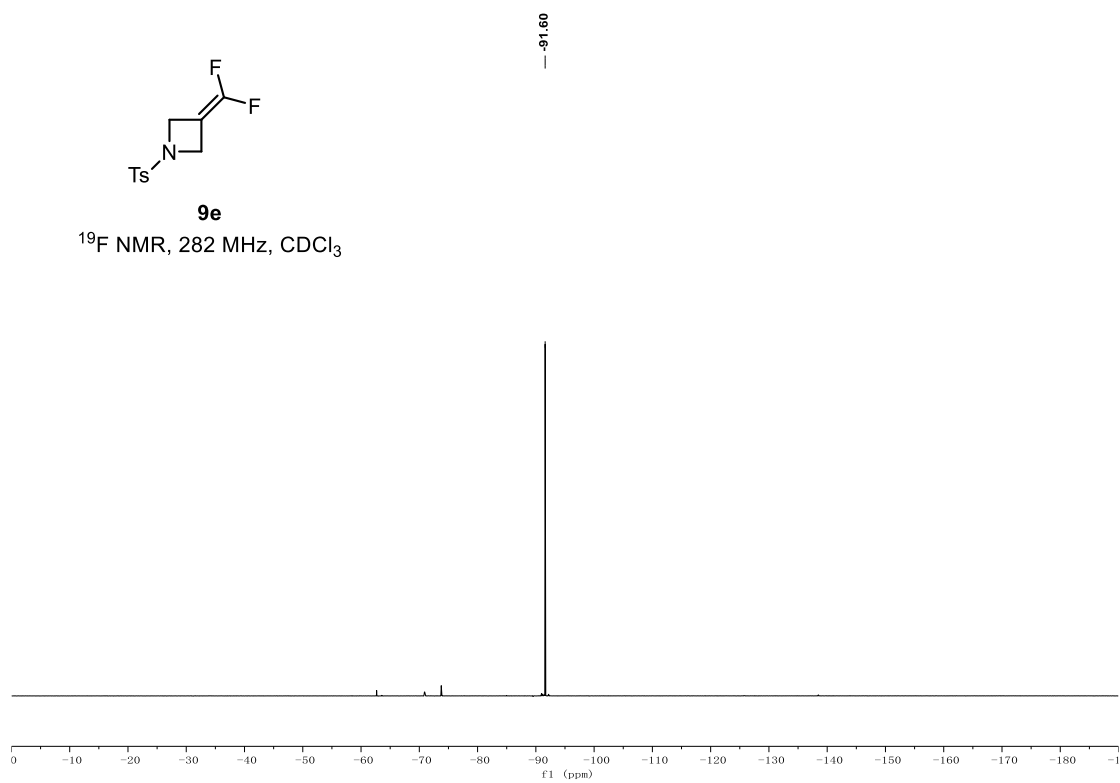

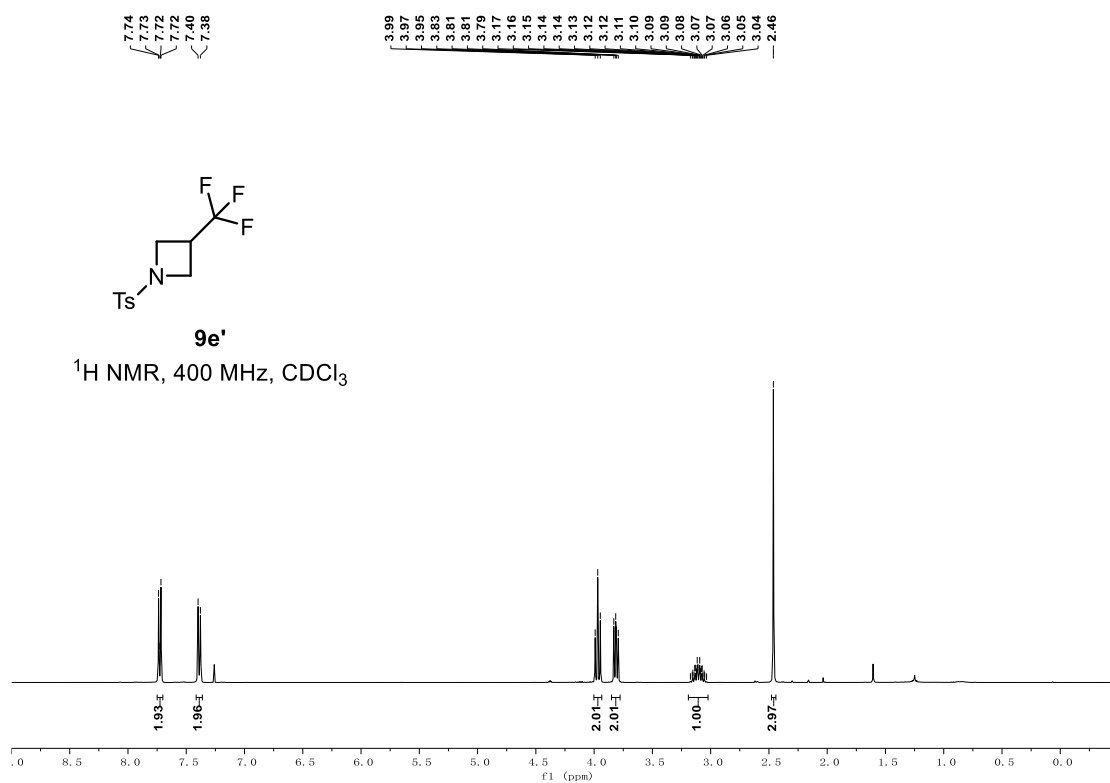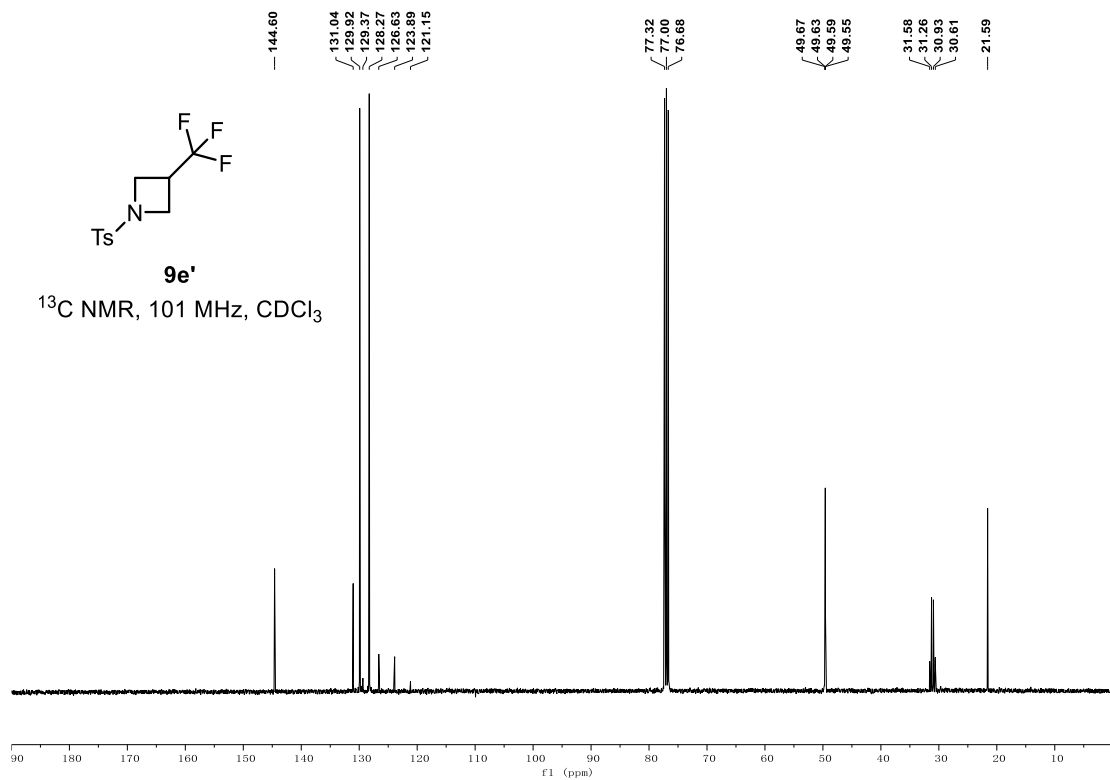

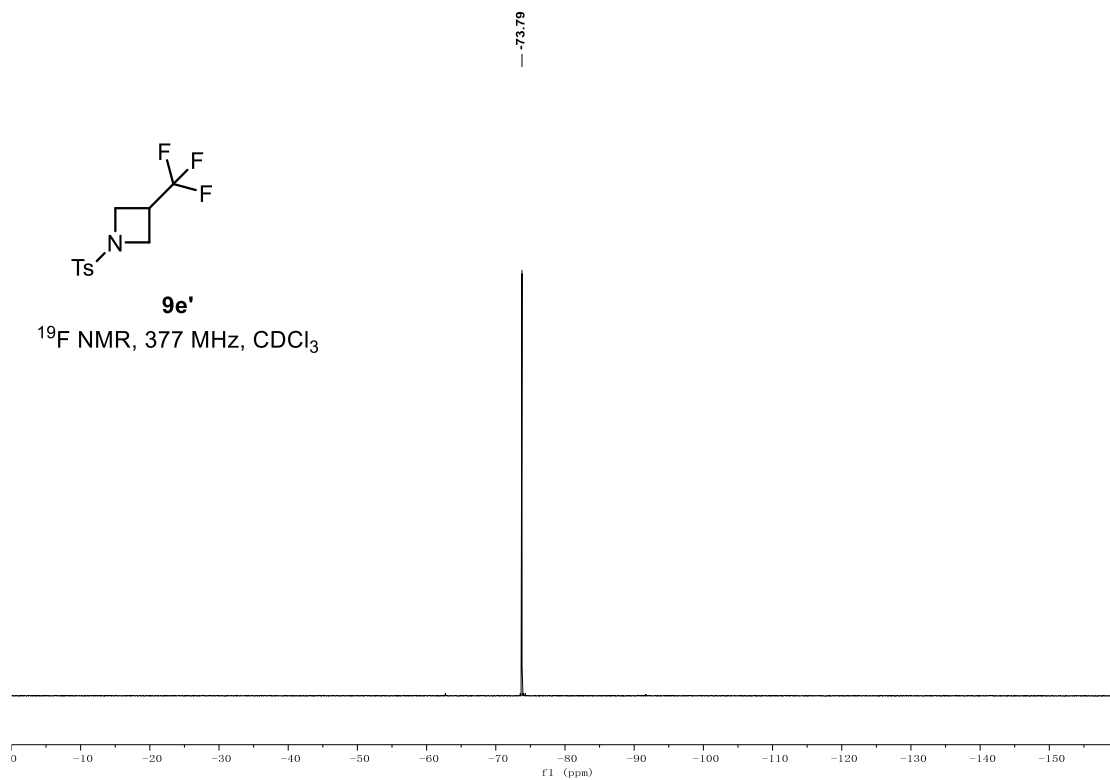

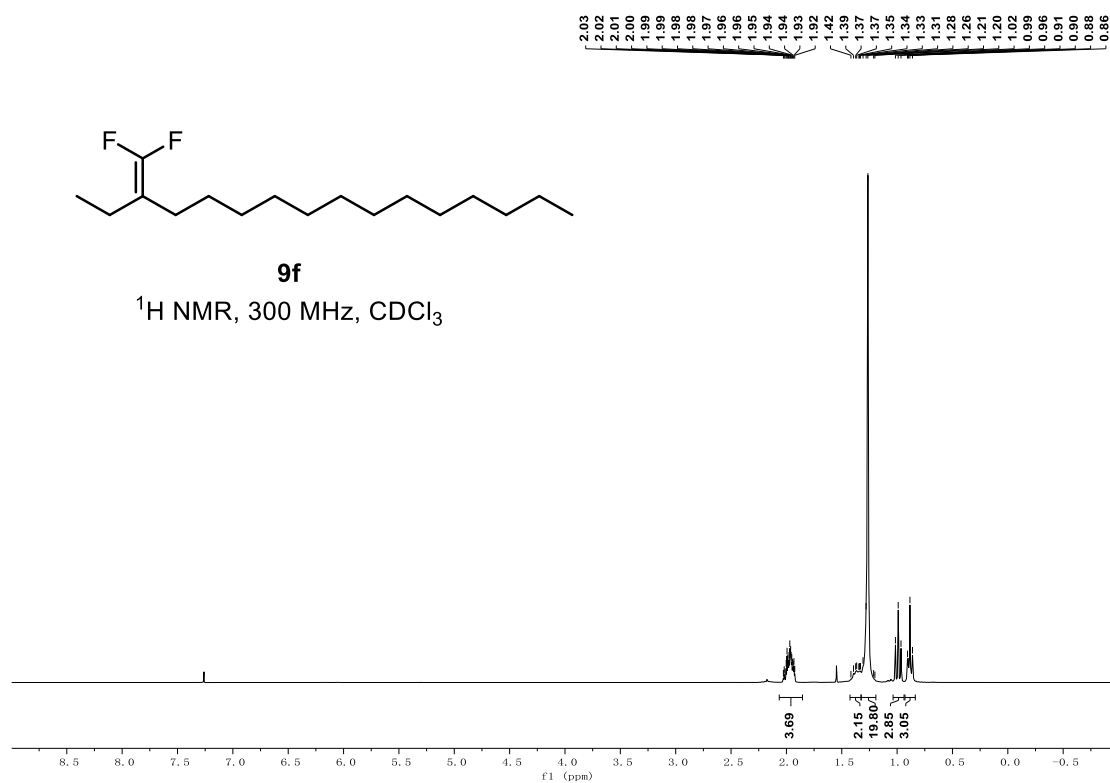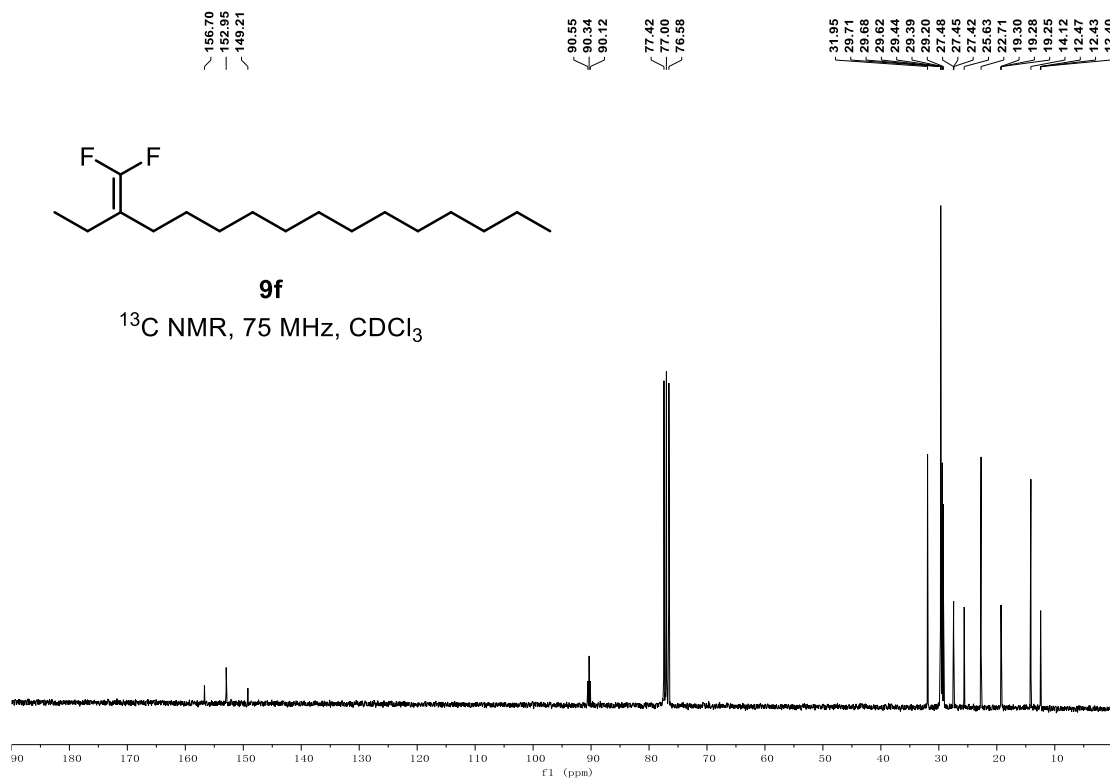

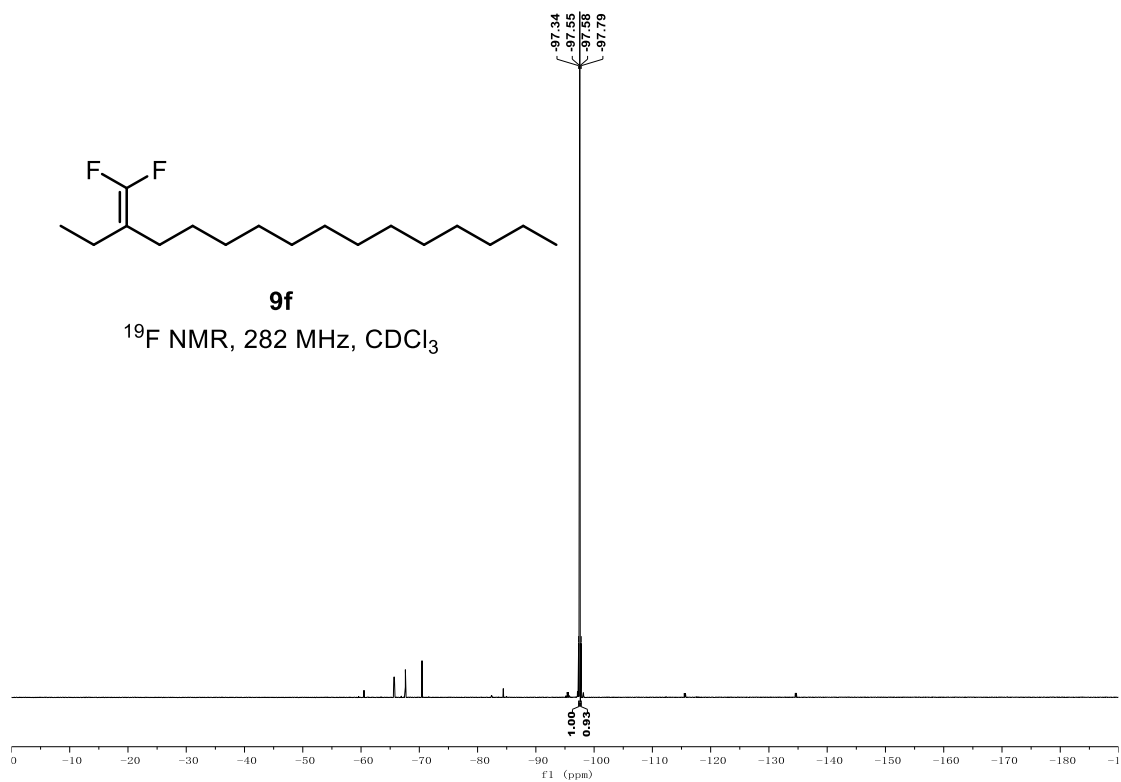



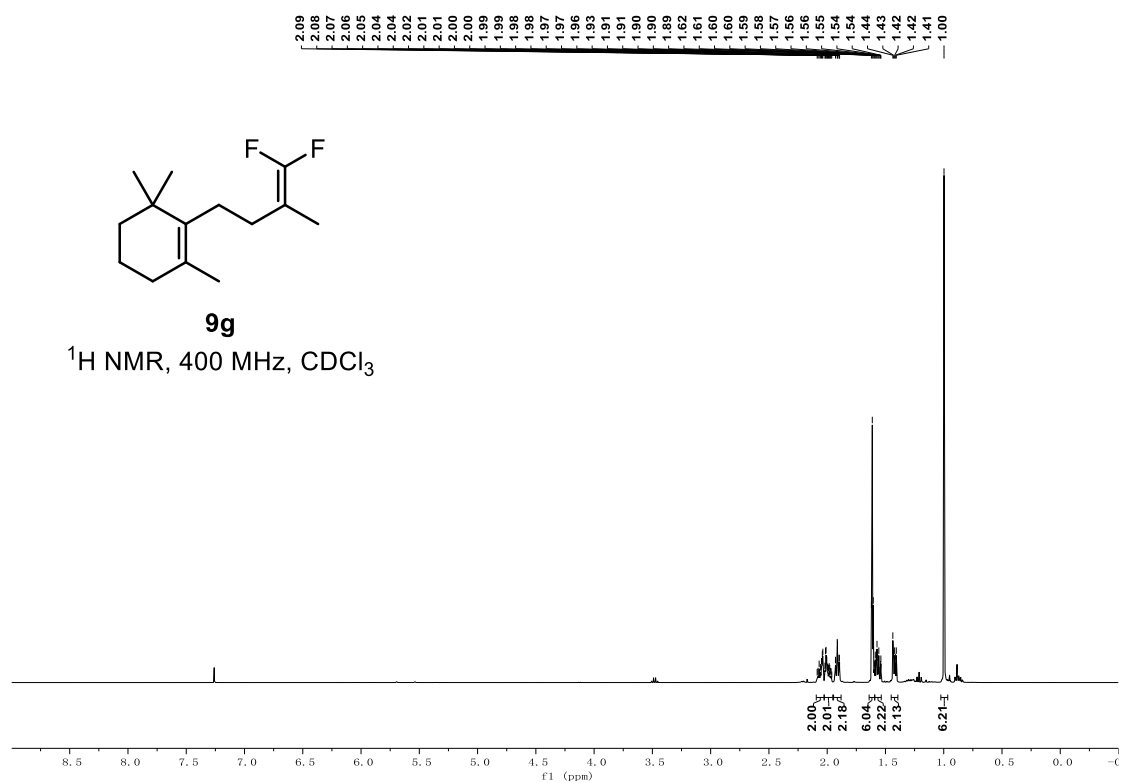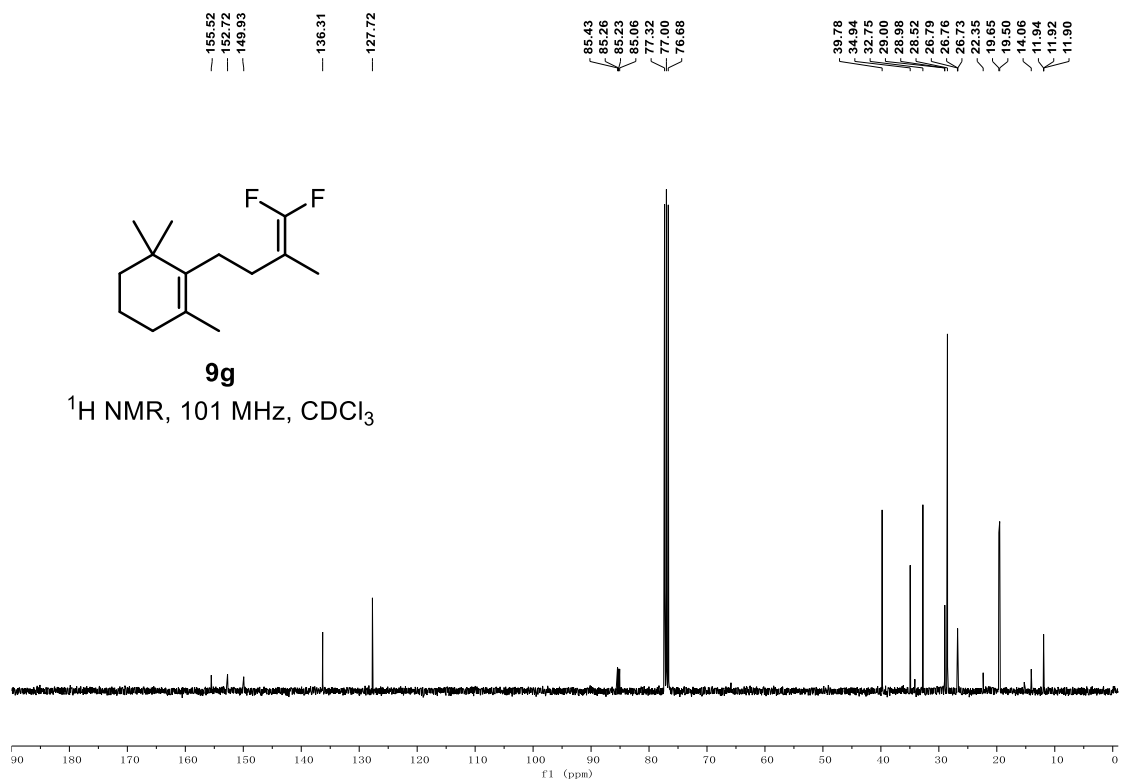

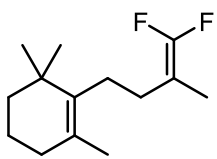

**9g**

$^{19}\text{F}$  NMR, 377 MHz,  $\text{CDCl}_3$

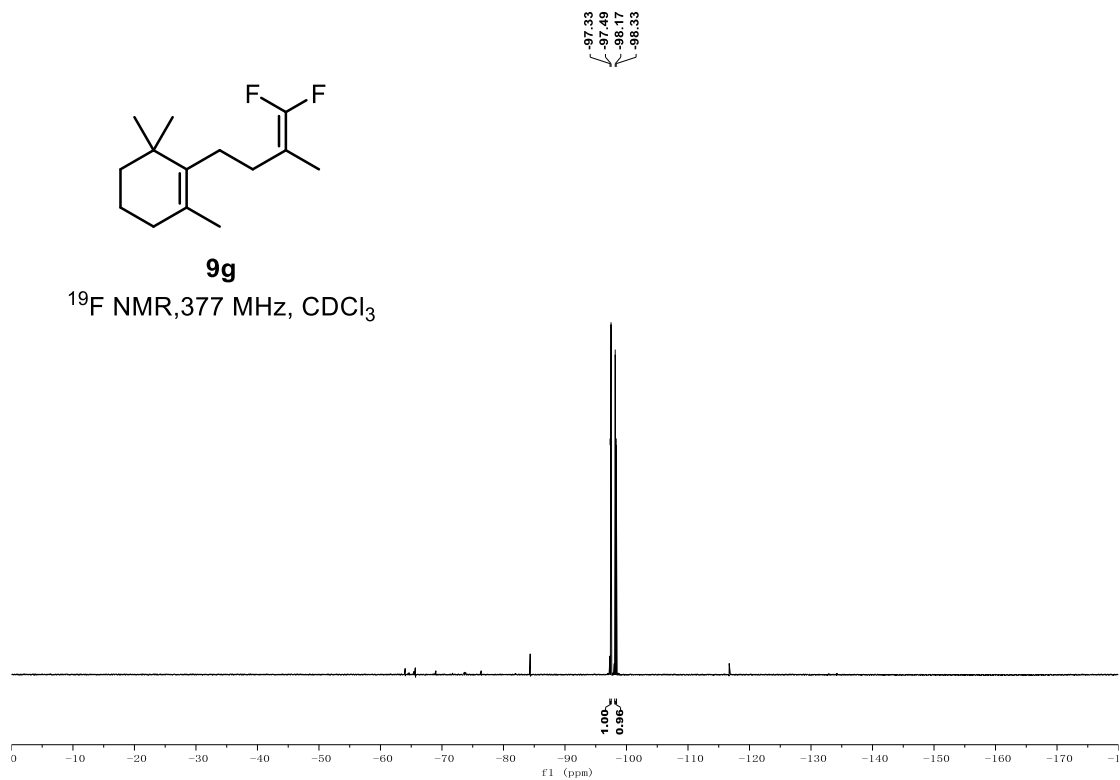

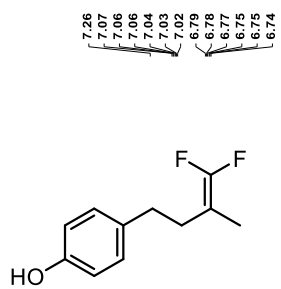

**9h**

<sup>1</sup>H NMR, 300 MHz, CDCl<sub>3</sub>

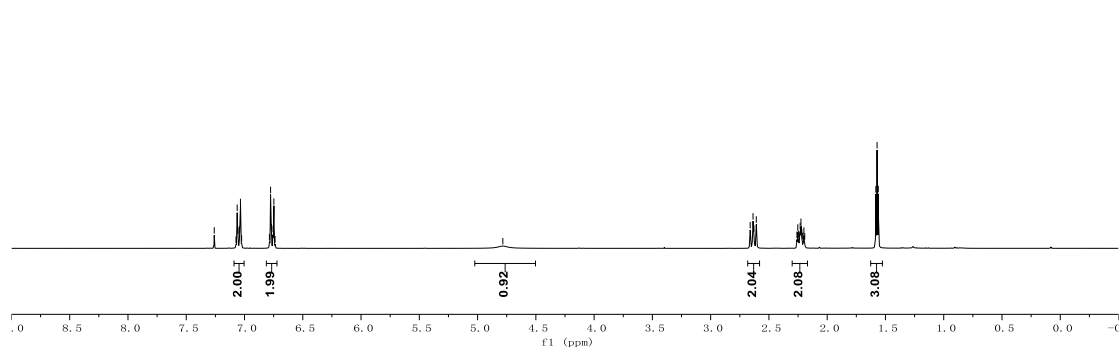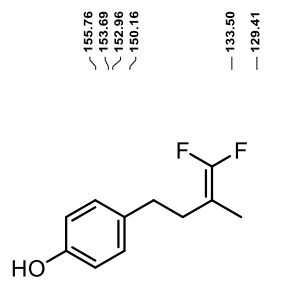

**9h**

<sup>13</sup>C NMR, 75 MHz, CDCl<sub>3</sub>

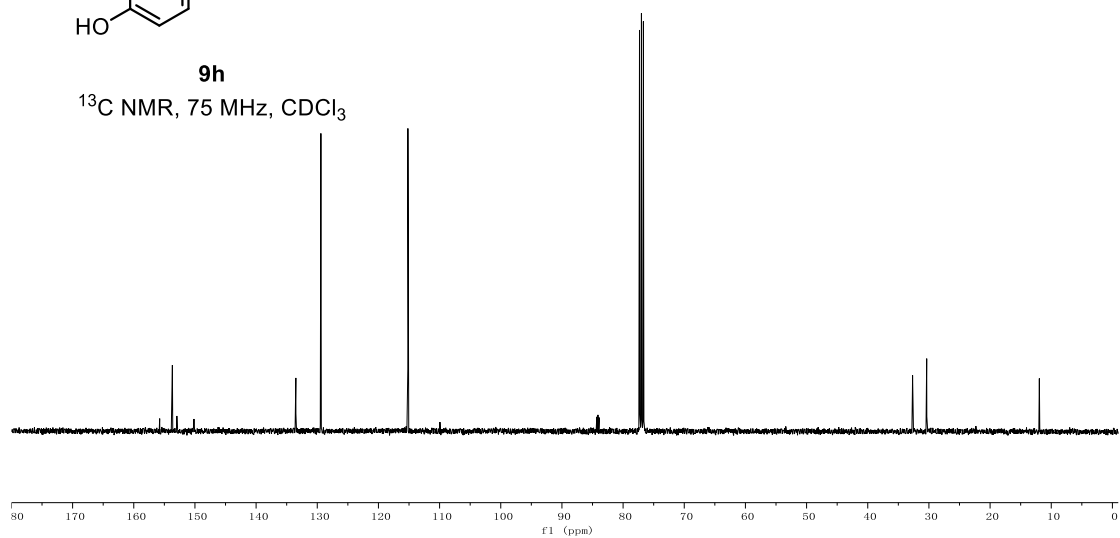

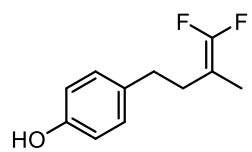

**9h**

$^{19}\text{F}$  NMR, 377 MHz,  $\text{CDCl}_3$

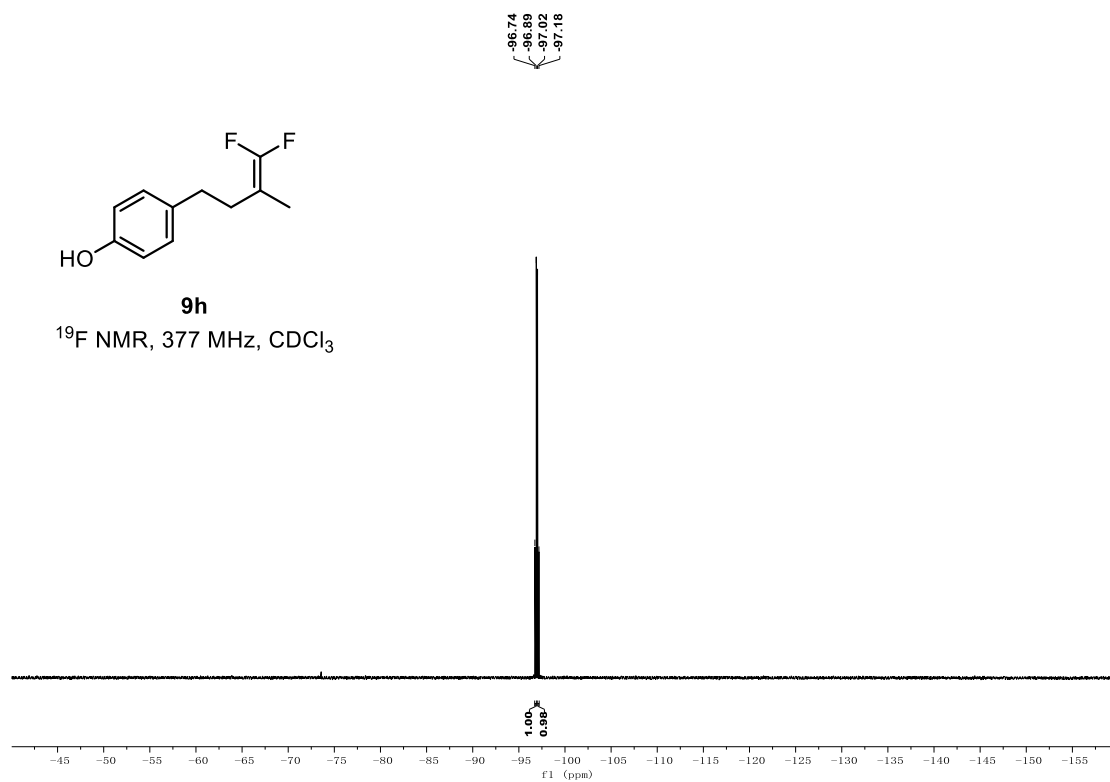

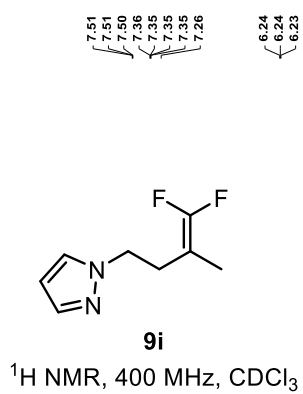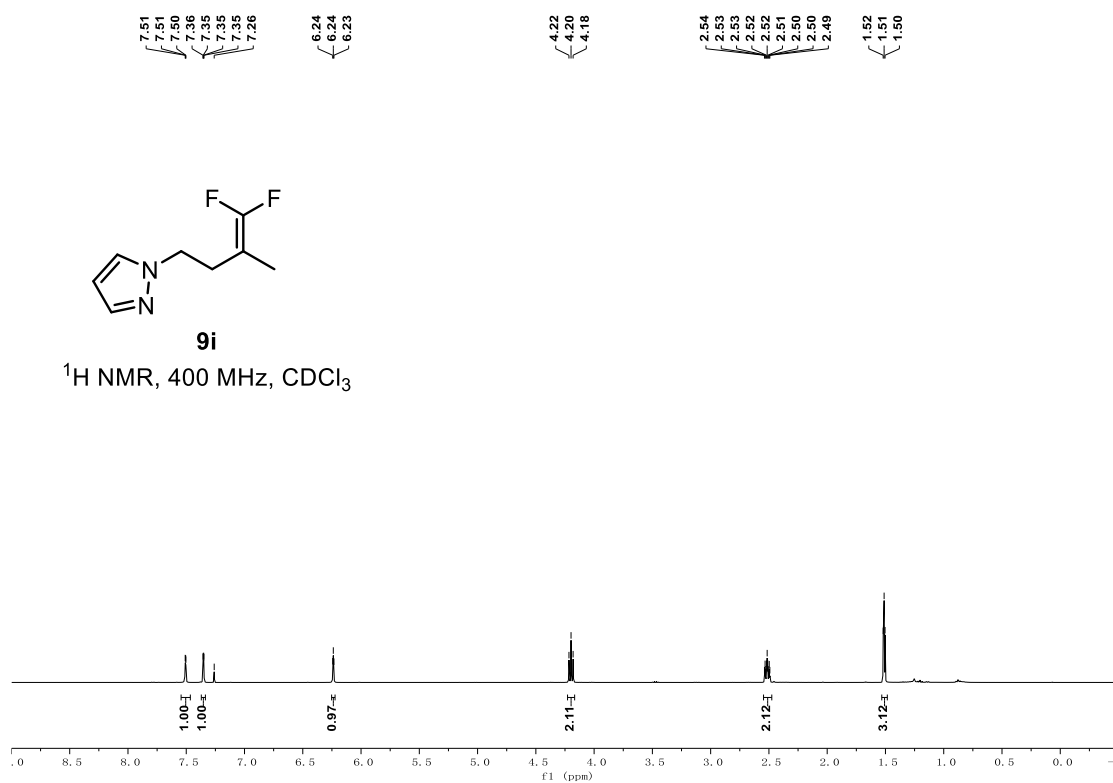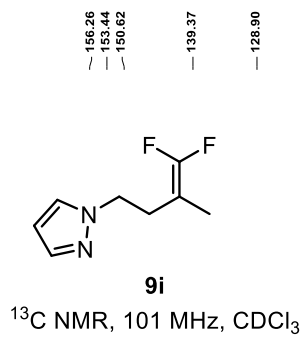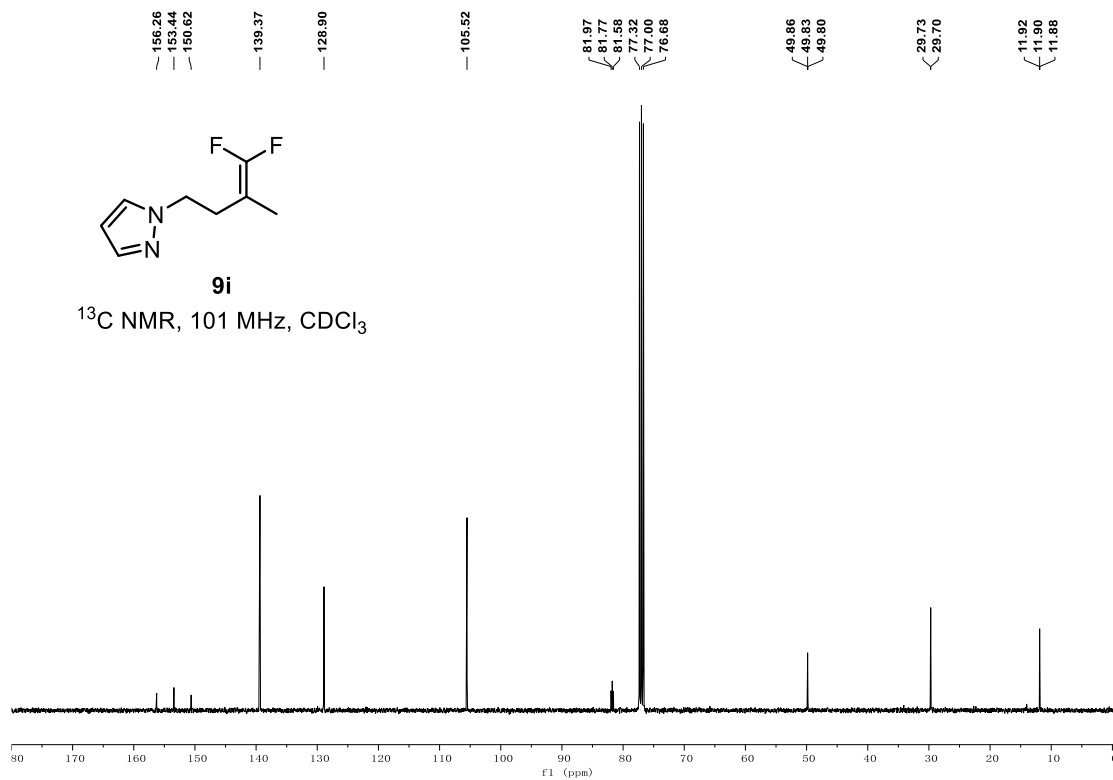

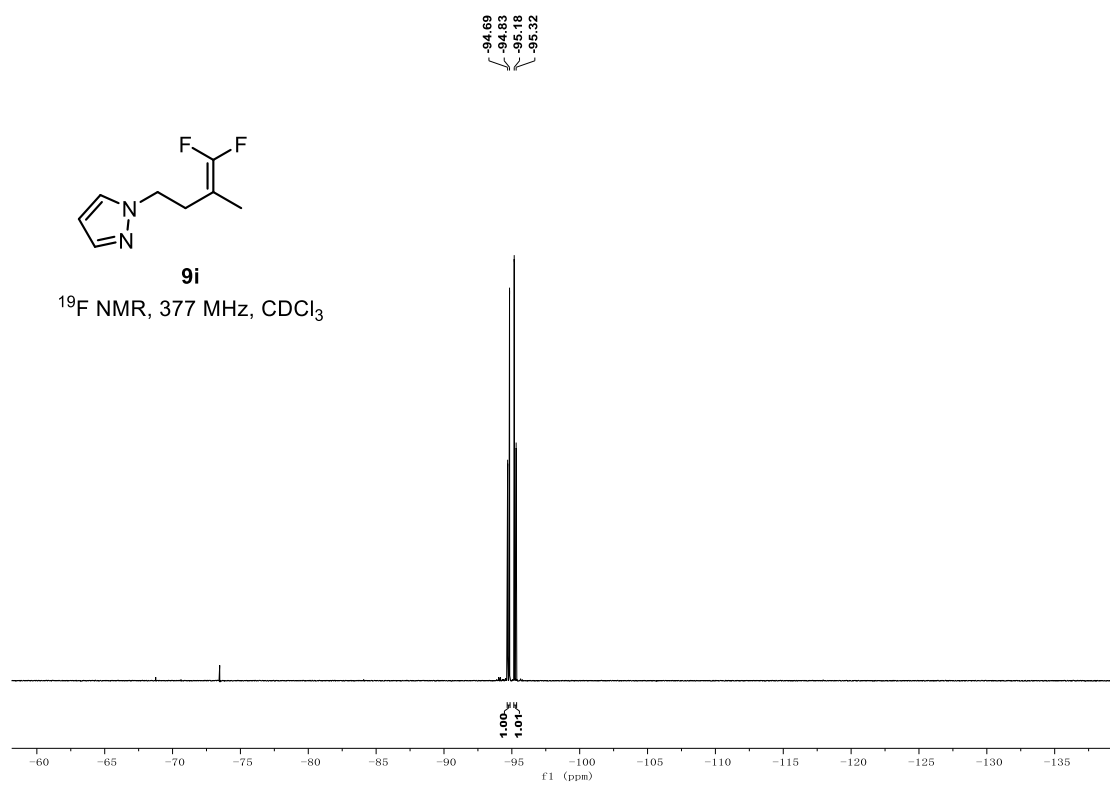

7.86  
7.85  
7.85  
7.84  
7.83  
7.82  
7.81  
7.80  
7.79  
7.73  
7.72  
7.71  
7.69  
7.68  
7.67  
7.67

3.67  
3.65  
3.65  
3.64  
3.64  
3.62  
2.06  
2.05  
2.05  
2.04  
2.03  
2.02  
2.01  
2.00  
2.00  
1.82  
1.80  
1.79  
1.78  
1.77  
1.76  
1.75  
1.74  
1.74  
1.72  
1.56  
1.56

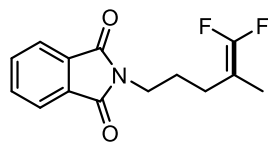

**9j**

<sup>1</sup>H NMR, 300 MHz, CDCl<sub>3</sub>

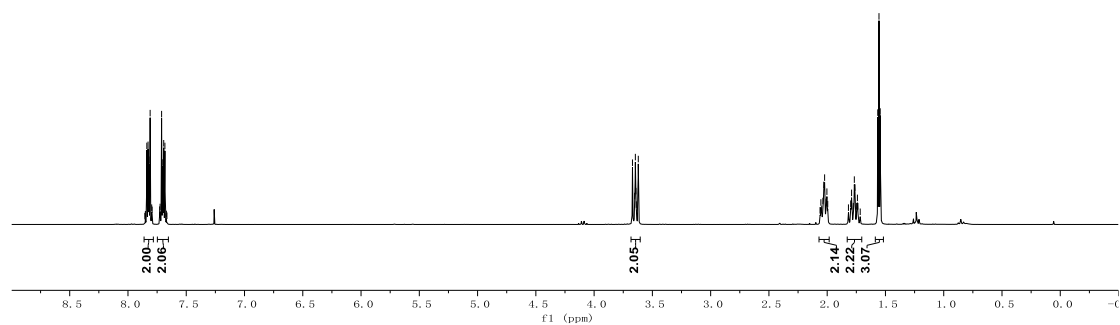

168.24

156.48

152.74

149.00

133.88

132.01

123.15

83.86

83.61

83.36

77.42

77.00

76.58

37.39

25.90

25.87

25.83

25.60

25.57

25.55

11.57

11.54

11.51

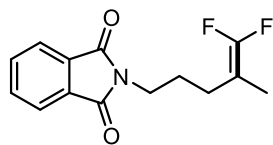

**9j**

<sup>13</sup>C NMR, 75 MHz, CDCl<sub>3</sub>

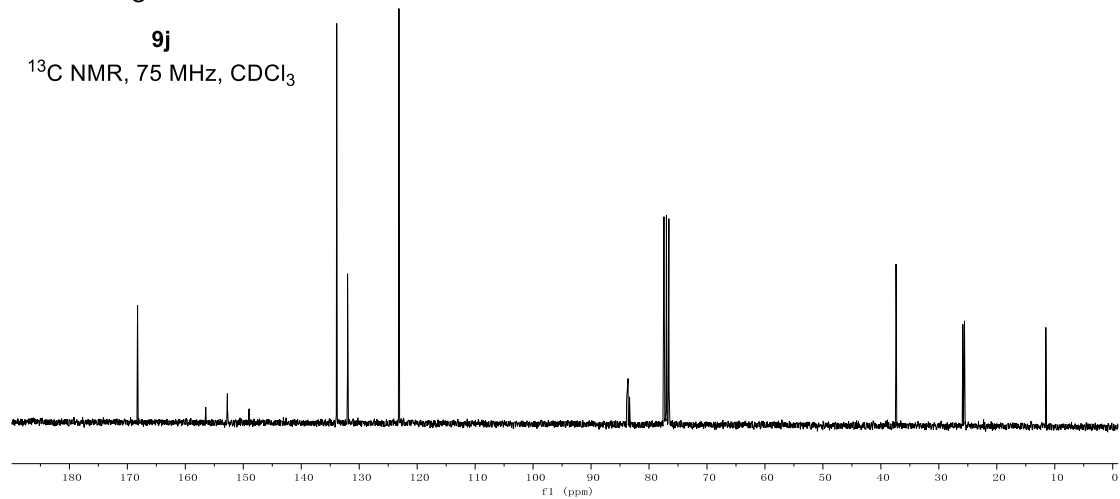

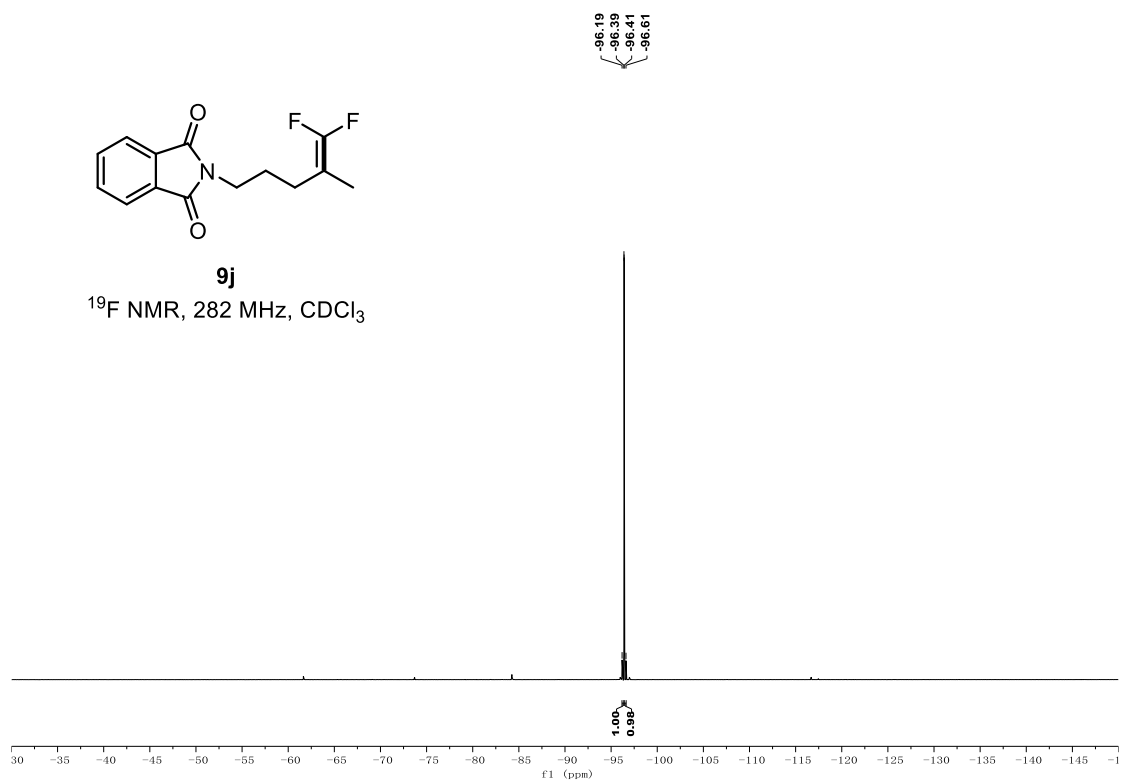



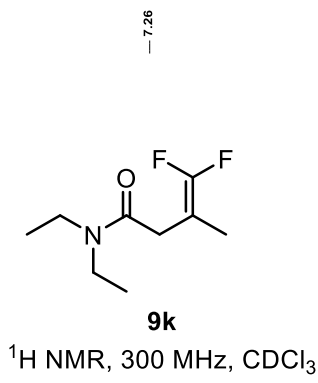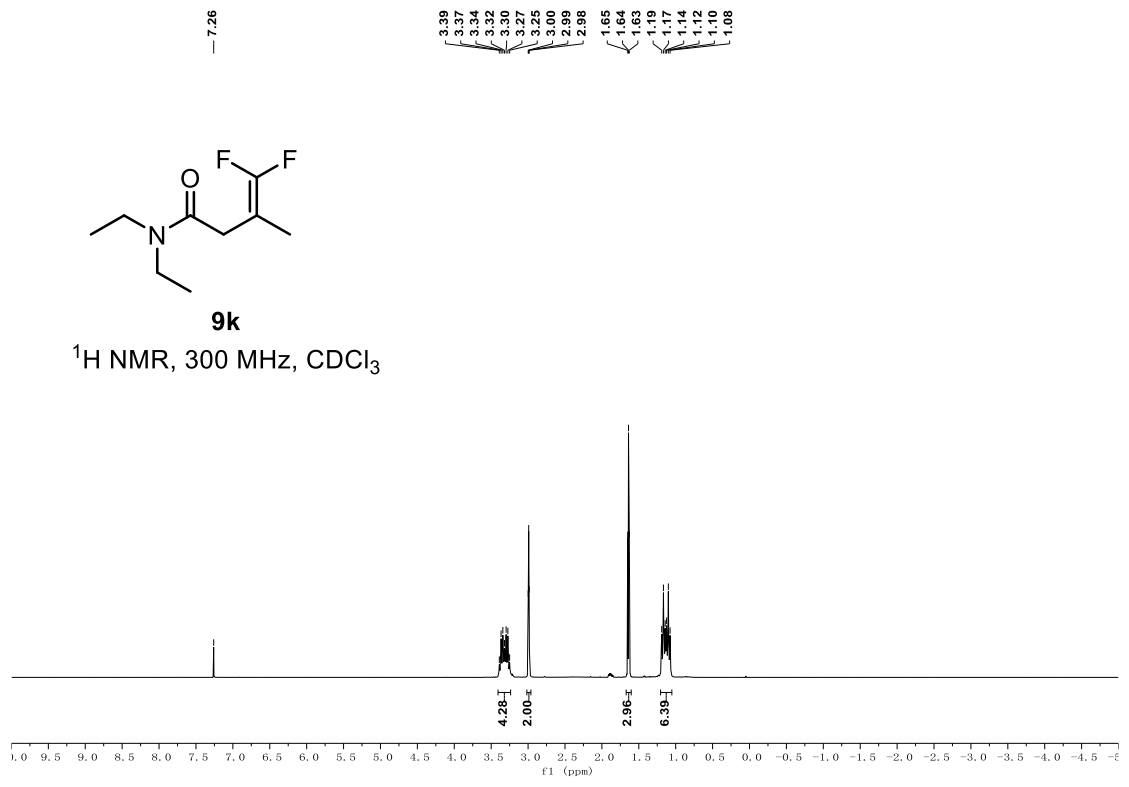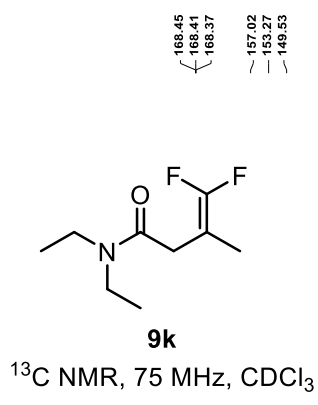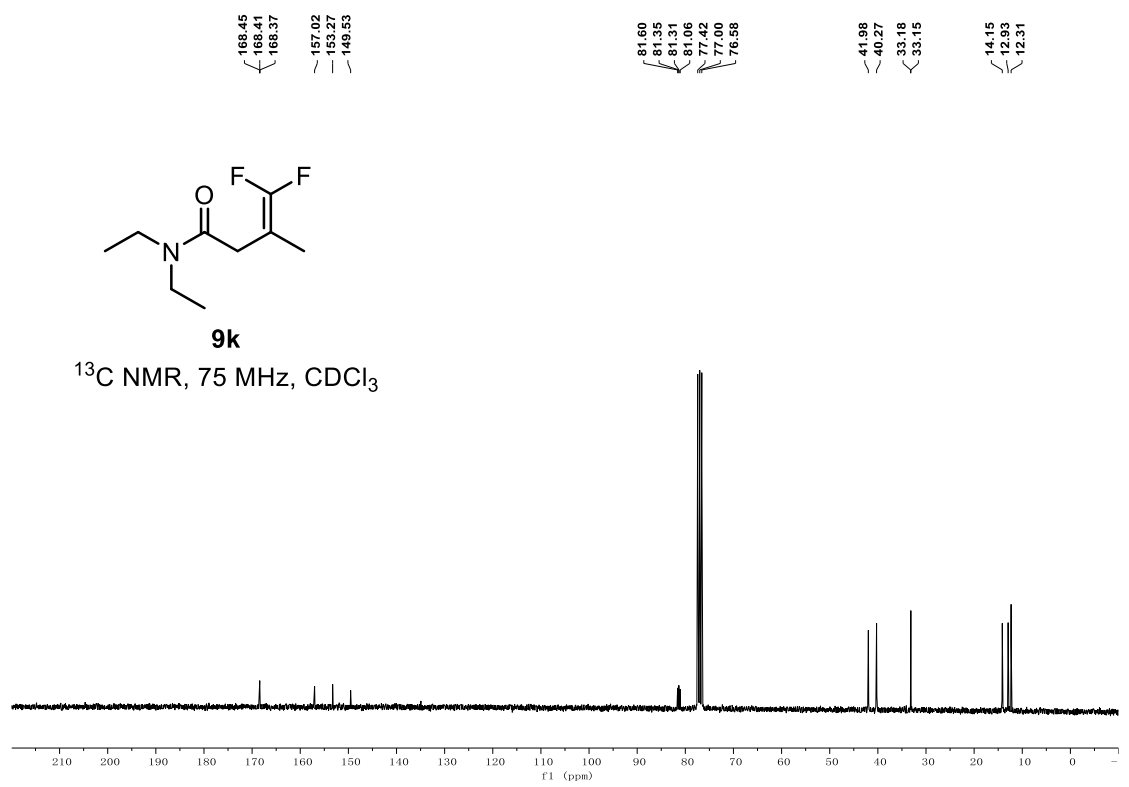

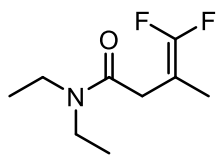

**9k**

$^{19}\text{F}$  NMR, 282 MHz,  $\text{CDCl}_3$

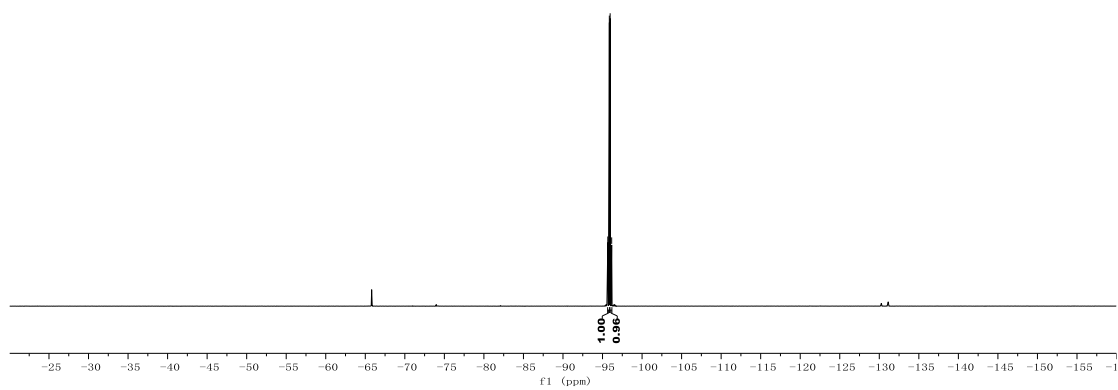

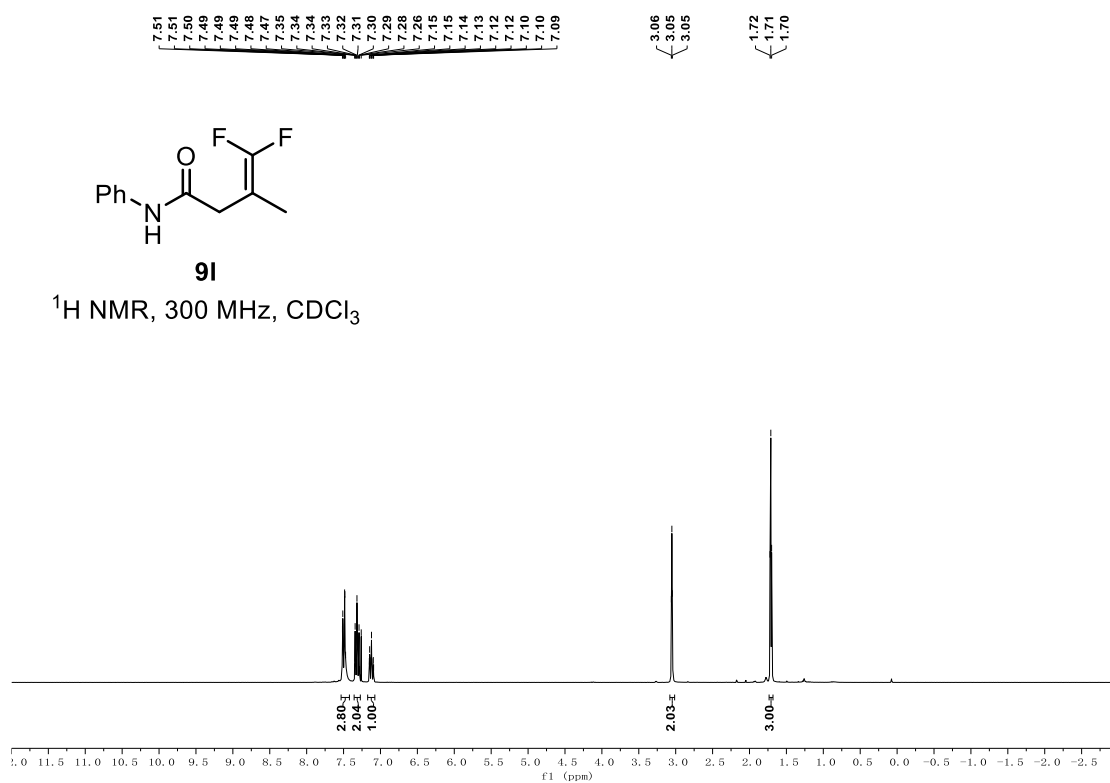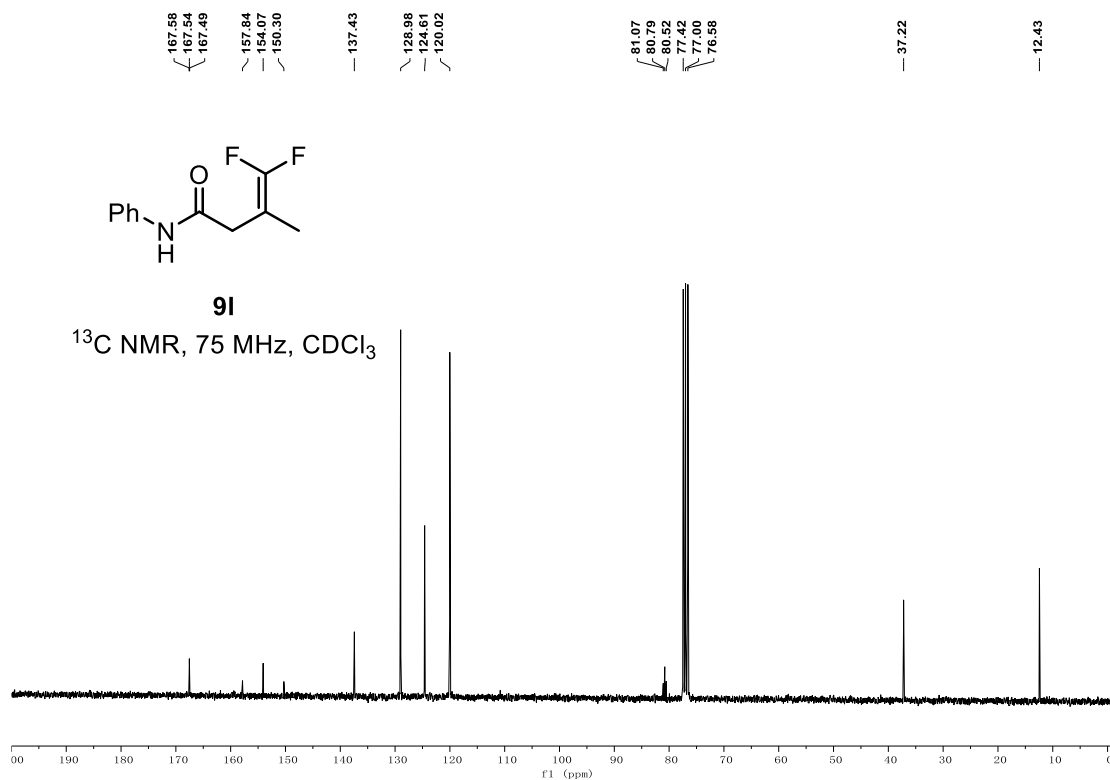

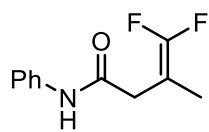

**9l**

$^{19}\text{F}$  NMR, 282 MHz,  $\text{CDCl}_3$

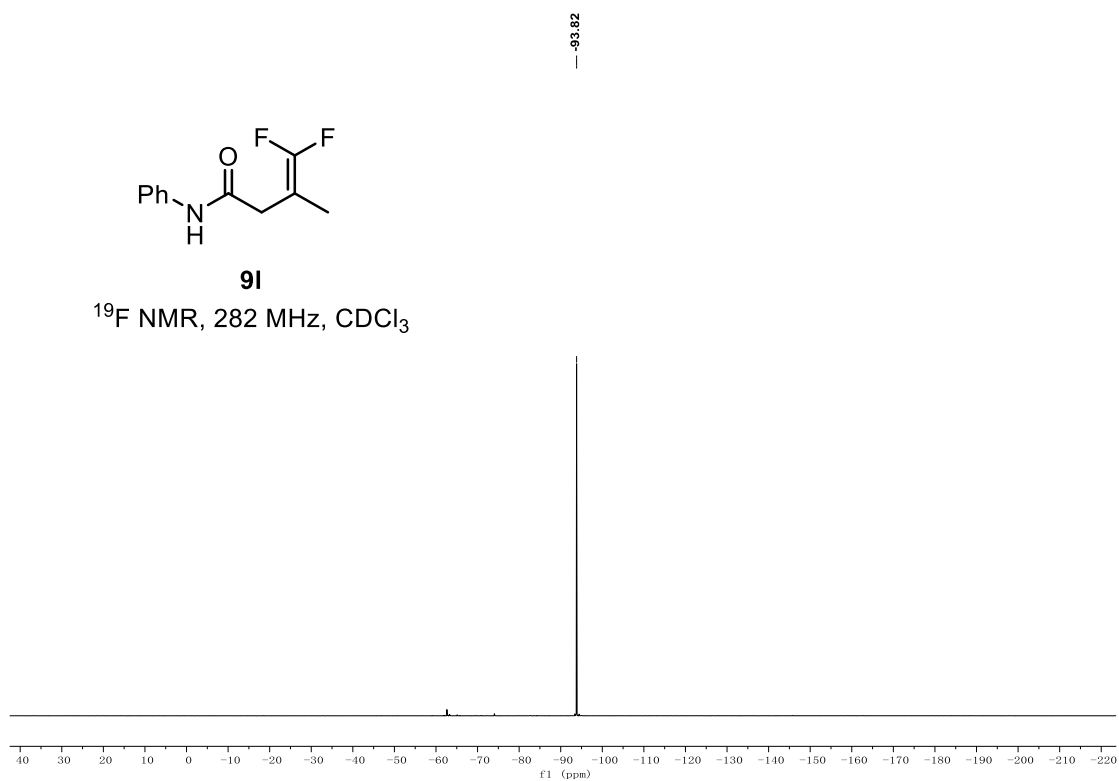

7.63  
7.62  
7.62  
7.61  
7.61  
7.60  
7.60  
7.60  
7.59  
7.59  
7.58  
7.57  
7.57  
7.56  
7.55  
7.55  
7.55  
7.54  
7.49  
7.49  
7.48  
7.48  
7.47  
7.47  
7.46  
7.46  
7.45  
7.44  
7.44  
7.43  
7.43  
7.39  
7.38  
7.38  
7.37  
7.37  
7.36  
7.36  
7.35  
7.35  
7.34  
7.34  
7.33  
7.33  
7.30  
7.29  
7.28  
7.27  
7.26  
7.25  
7.25  
3.36  
3.35  
3.34  
1.57  
1.56  
1.55  
1.54

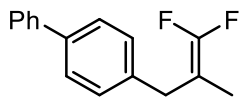

**9m**

$^1\text{H}$  NMR, 300 MHz,  $\text{CDCl}_3$

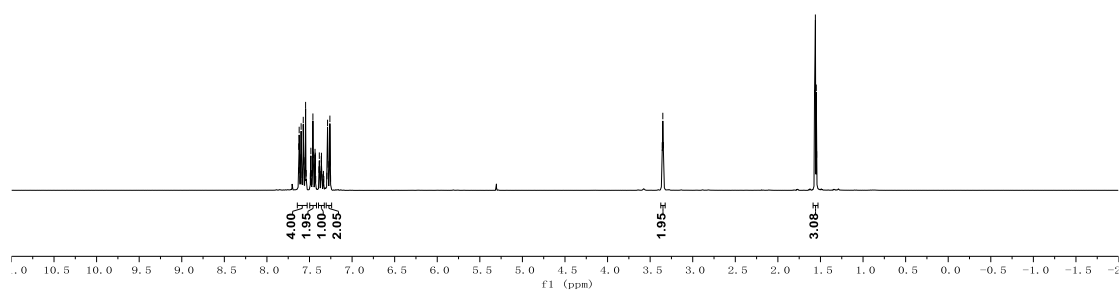

157.05  
153.32  
153.31  
149.57  
140.86  
139.43  
137.66  
137.62  
137.59  
128.96  
128.73  
127.21  
127.15  
126.99  
84.86  
84.61  
84.35  
77.42  
76.58  
34.17  
34.15  
34.14  
34.12  
11.86  
11.84  
11.82

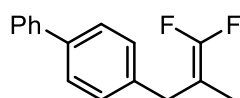

**9m**

$^{13}\text{C}$  NMR, 75 MHz,  $\text{CDCl}_3$

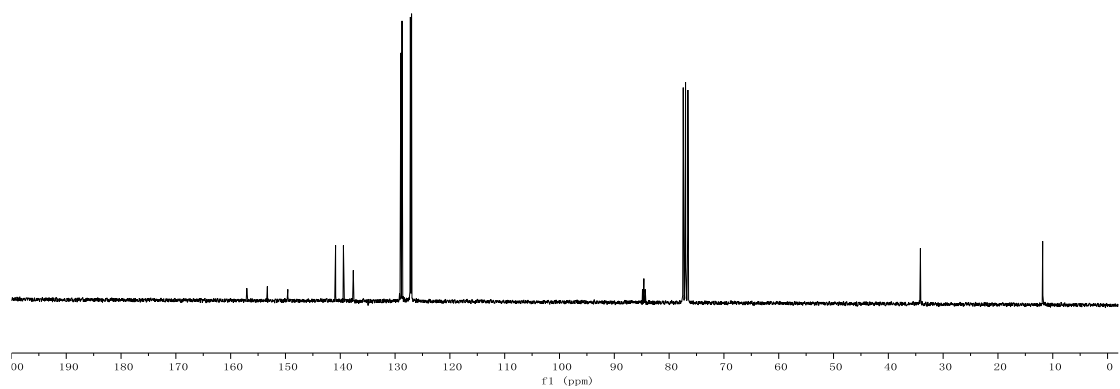

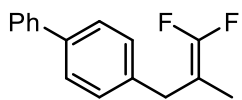

**9m**

$^{19}\text{F}$  NMR, 282 MHz,  $\text{CDCl}_3$

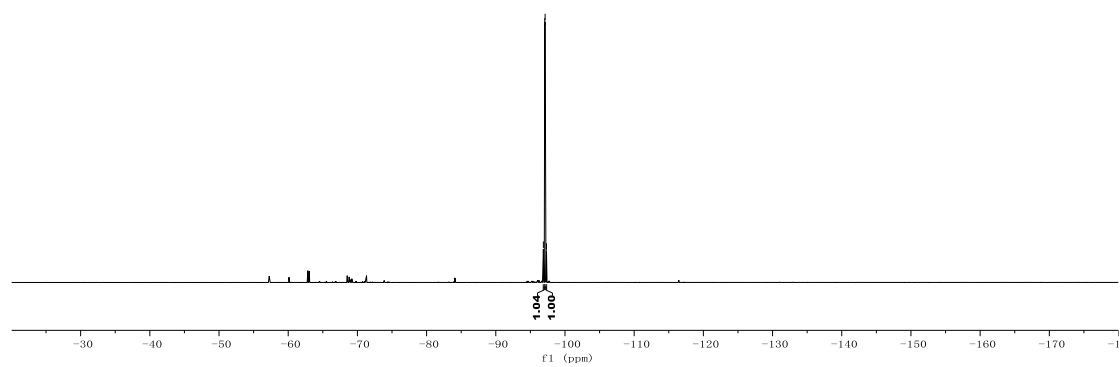

-96.88  
-97.07  
-97.13  
-97.33

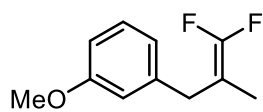

**9n**

$^1\text{H}$  NMR, 300 MHz,  $\text{CDCl}_3$

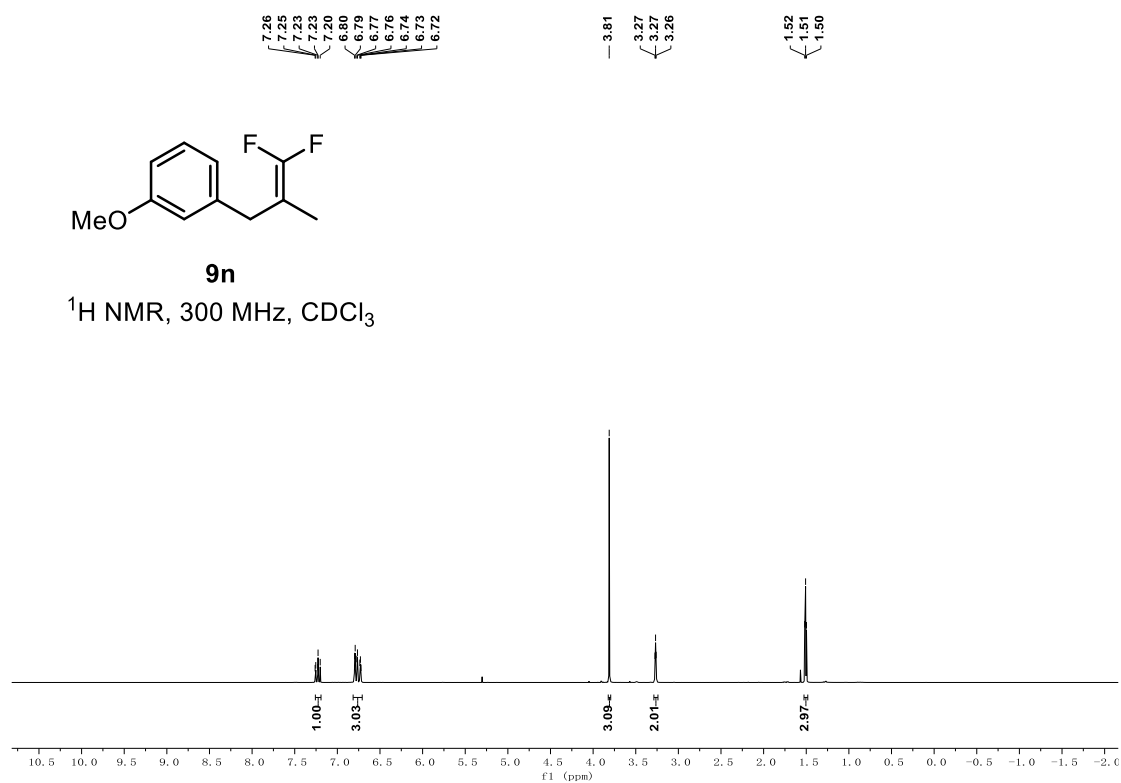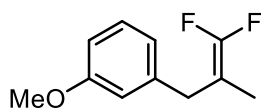

**9n**

$^{13}\text{C}$  NMR, 75 MHz,  $\text{CDCl}_3$

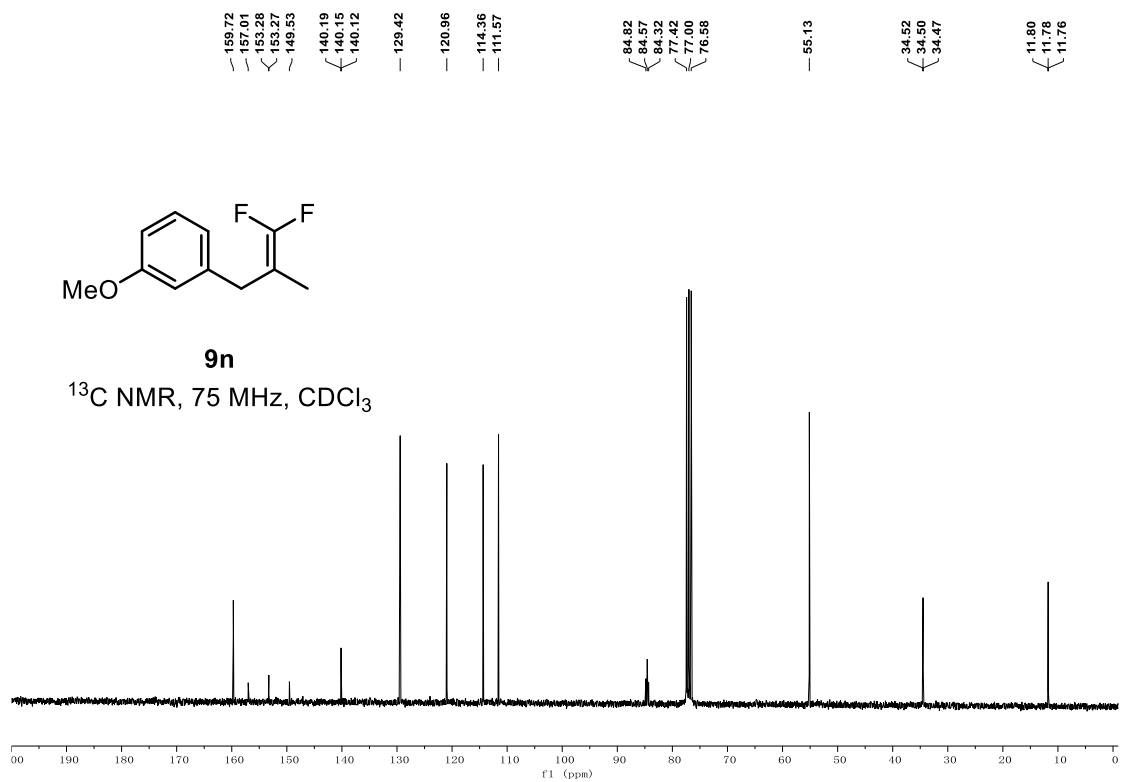

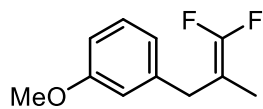

**9n**

$^{19}\text{F}$  NMR, 282 MHz,  $\text{CDCl}_3$

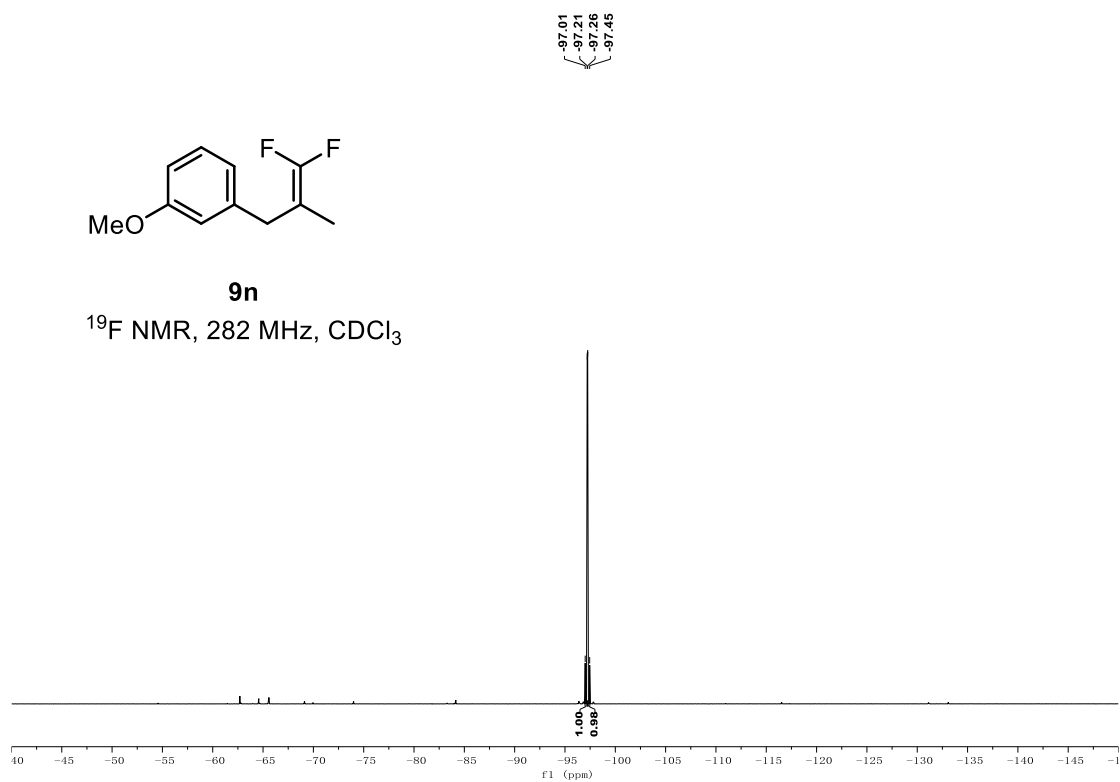



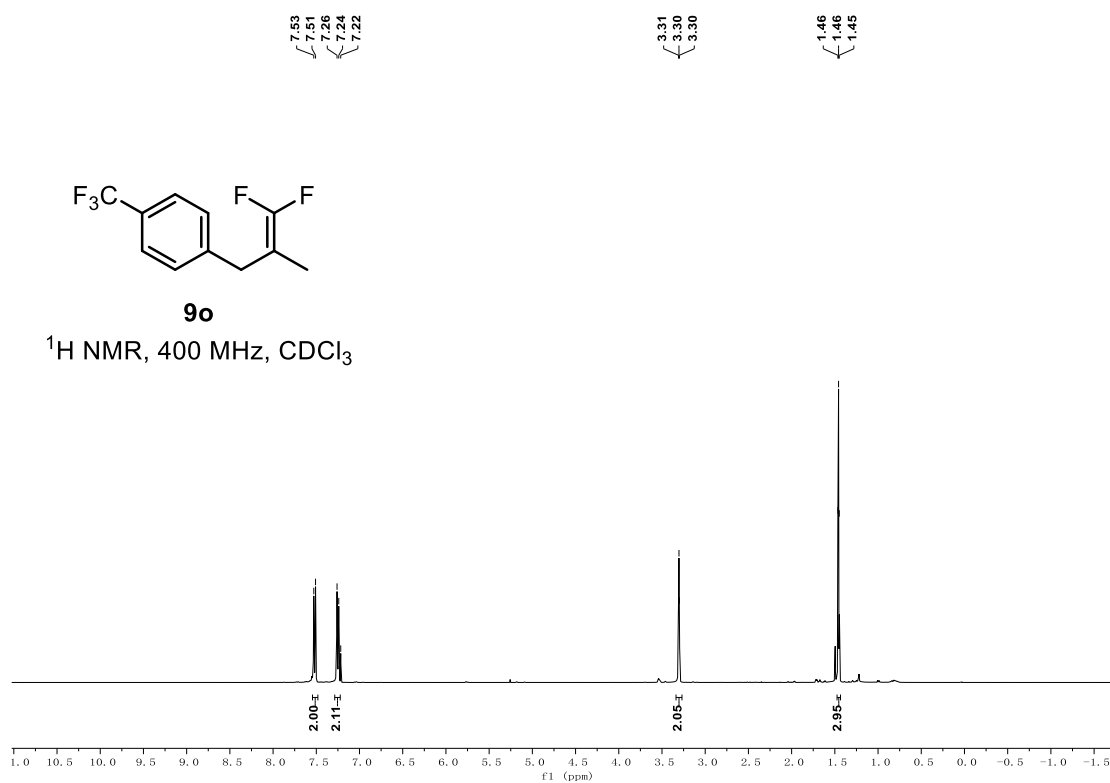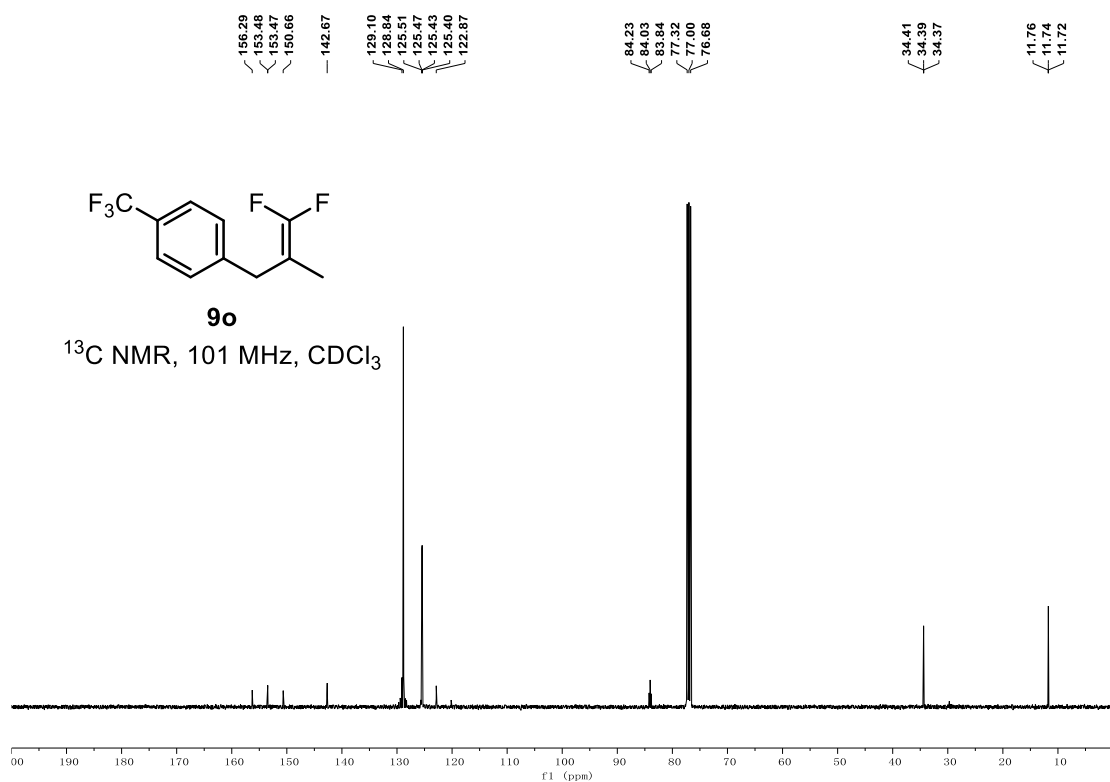

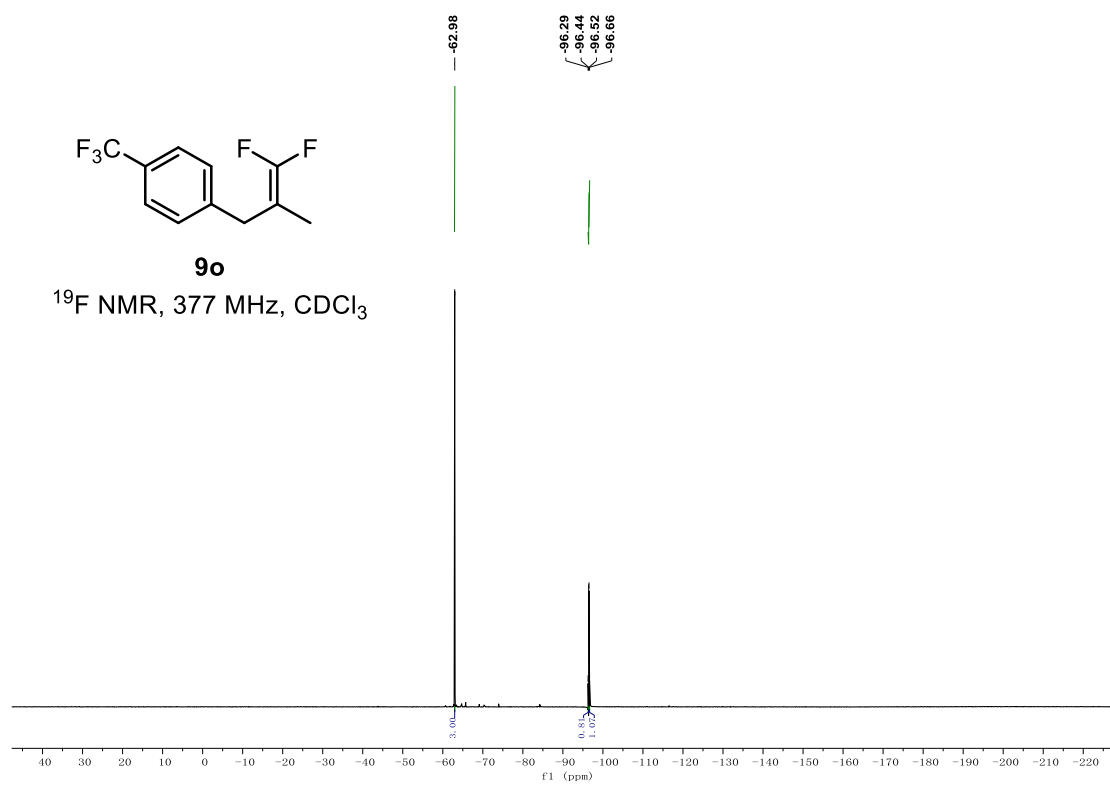

7.34  
7.33  
7.32  
7.31  
7.30  
7.29  
7.28  
7.26  
7.25  
7.24  
7.23  
7.22  
7.21  
7.15  
7.13

3.21  
3.21  
3.20

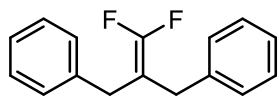

**9p**

$^1\text{H}$  NMR, 400 MHz,  $\text{CDCl}_3$

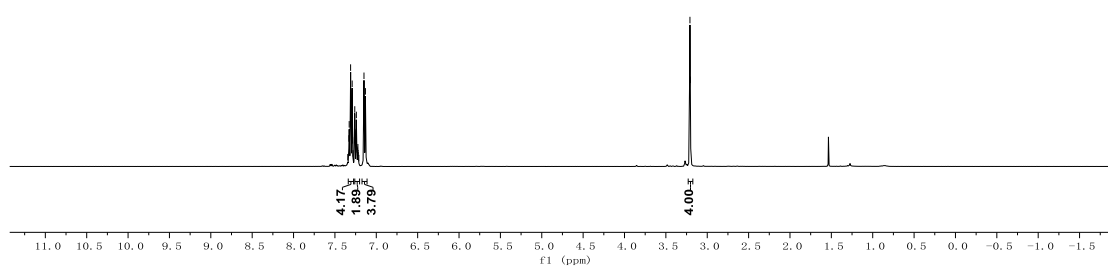

157.04  
154.22  
151.39

138.33  
138.30  
138.27  
128.76  
126.50  
126.49

89.15  
88.97  
88.80

77.32  
77.00  
76.68

31.57  
31.55  
31.54

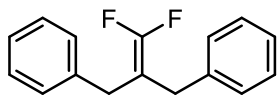

**9p**

$^{13}\text{C}$  NMR, 101 MHz,  $\text{CDCl}_3$

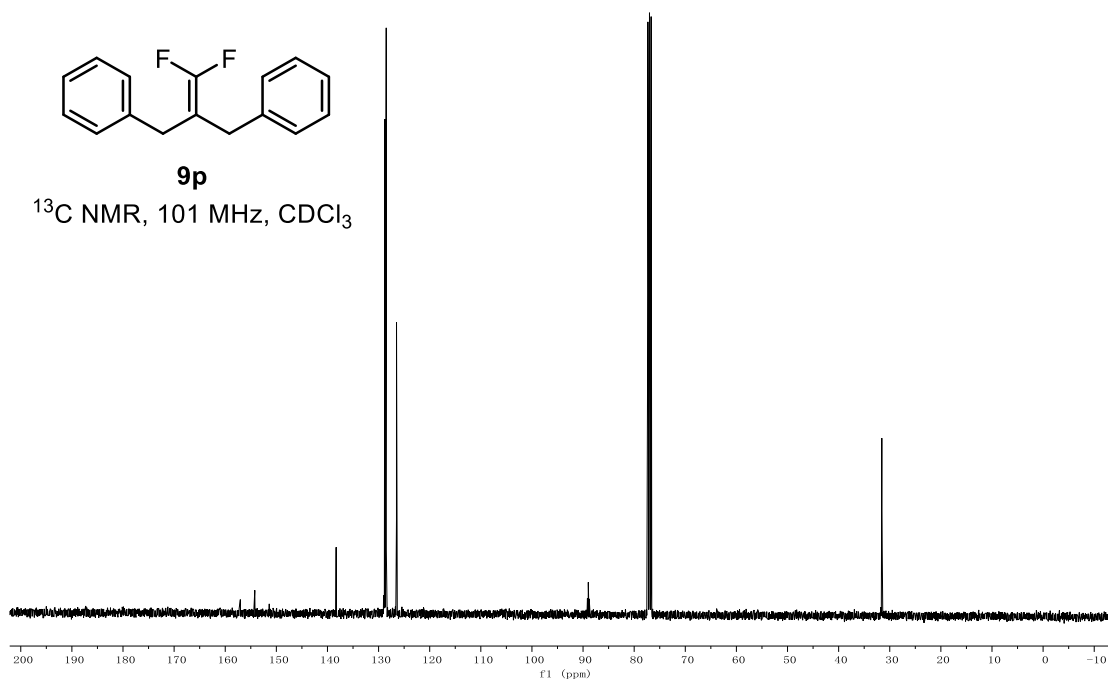

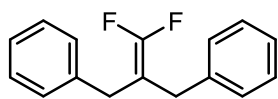

**9p**

$^{19}\text{F}$  NMR, 376 MHz,  $\text{CDCl}_3$

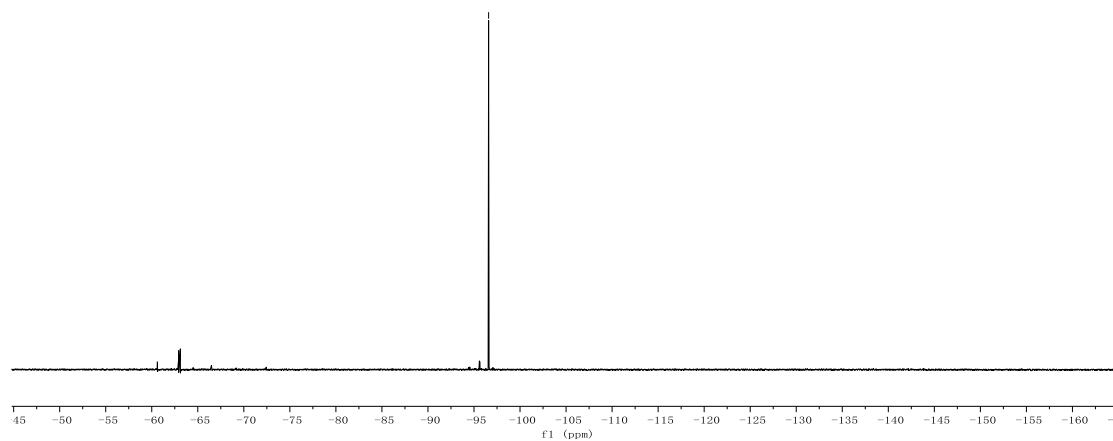

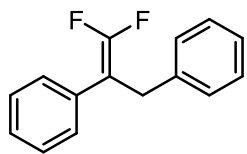

**9q**

<sup>1</sup>H NMR, 300 MHz, CDCl<sub>3</sub>

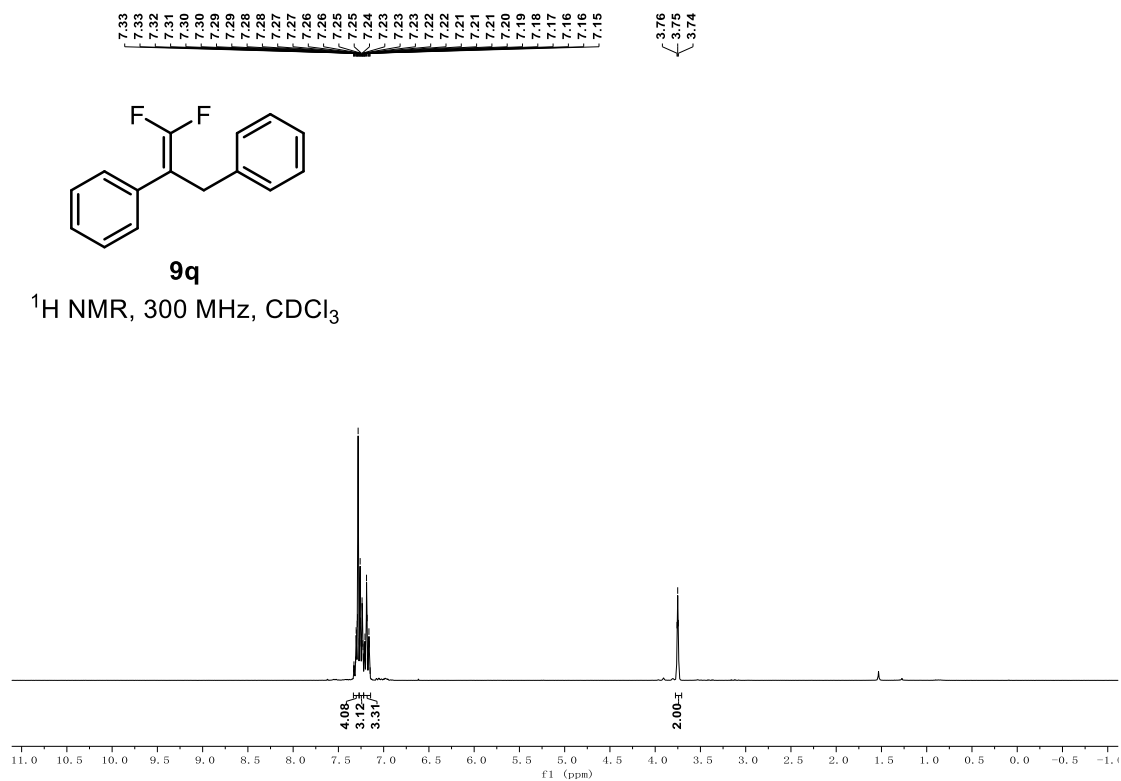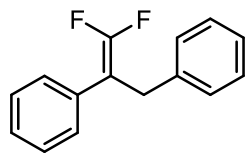

**9q**

<sup>13</sup>C NMR, 75 MHz, CDCl<sub>3</sub>

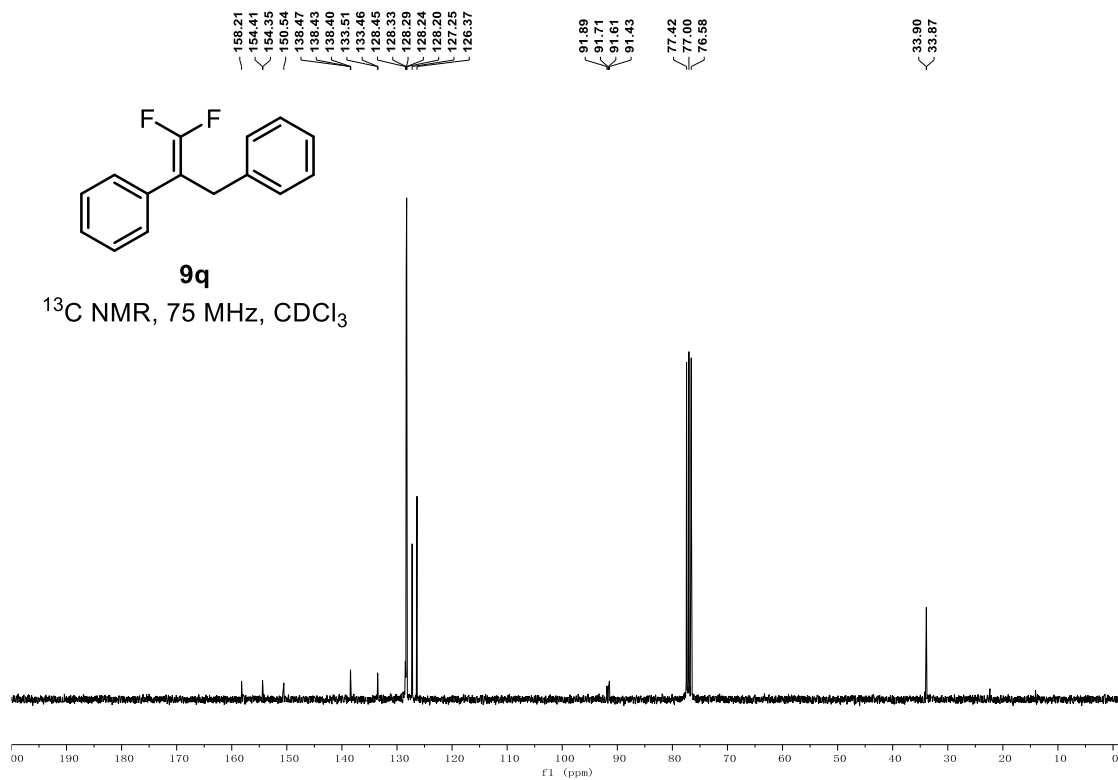

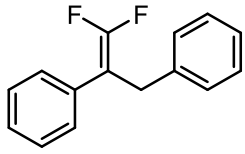

9q

$^{19}\text{F}$  NMR, 282 MHz,  $\text{CDCl}_3$

-90.90  
-90.94  
-91.36  
-91.50

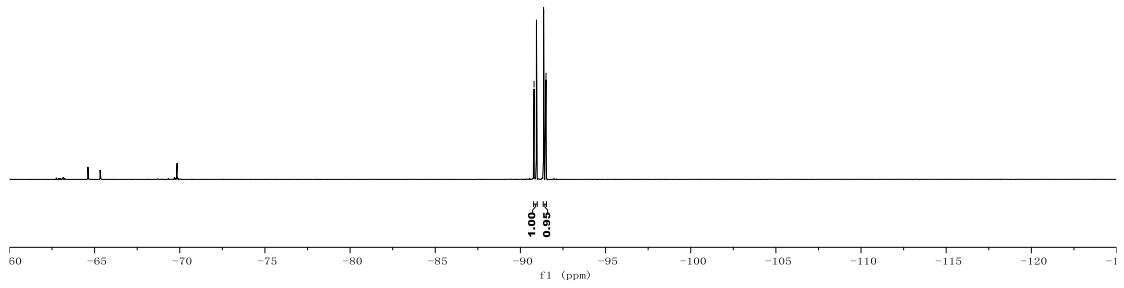

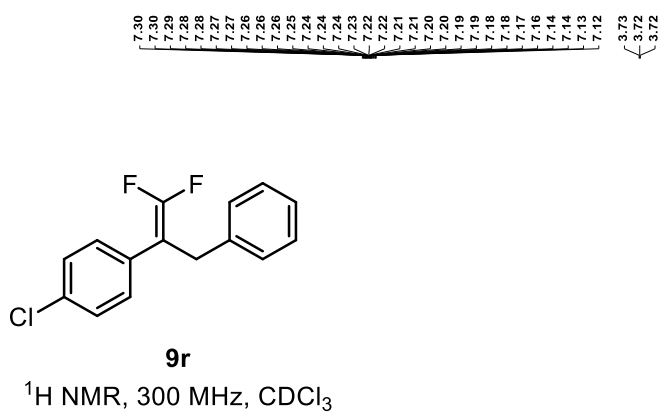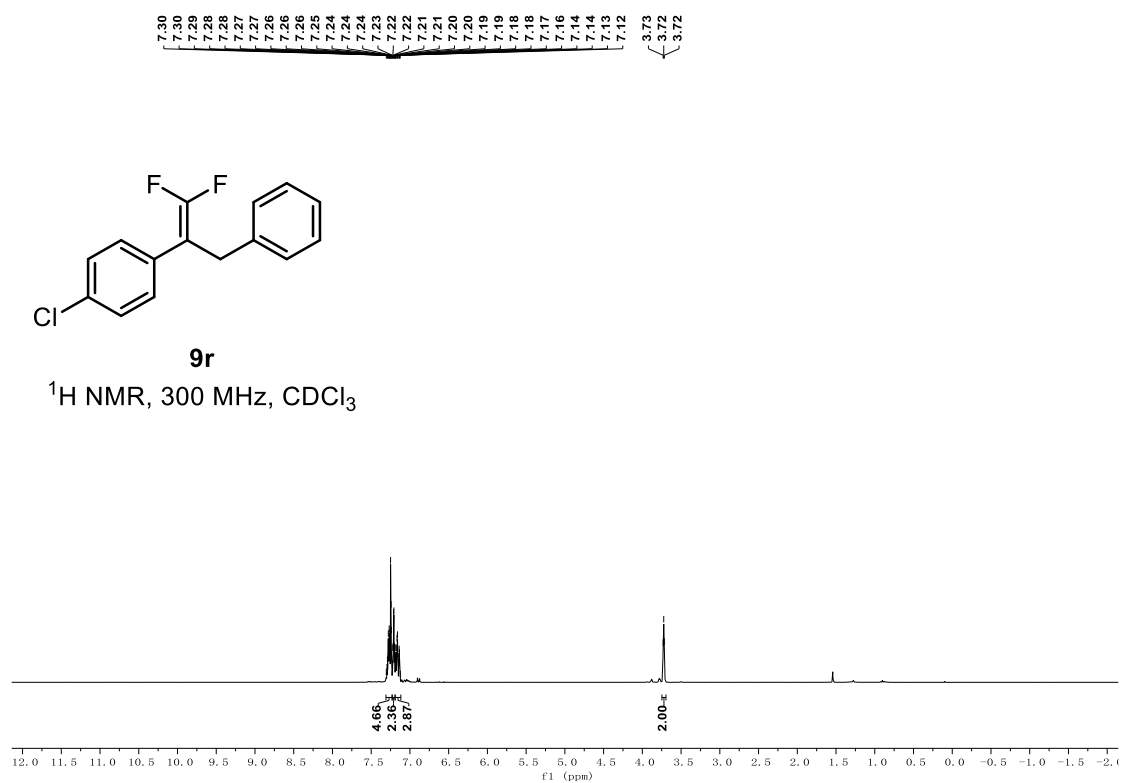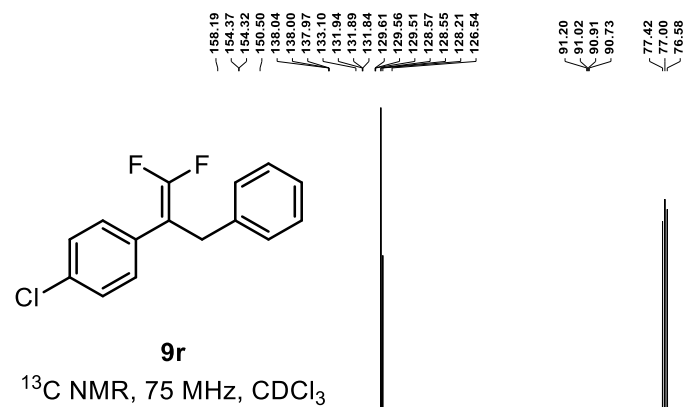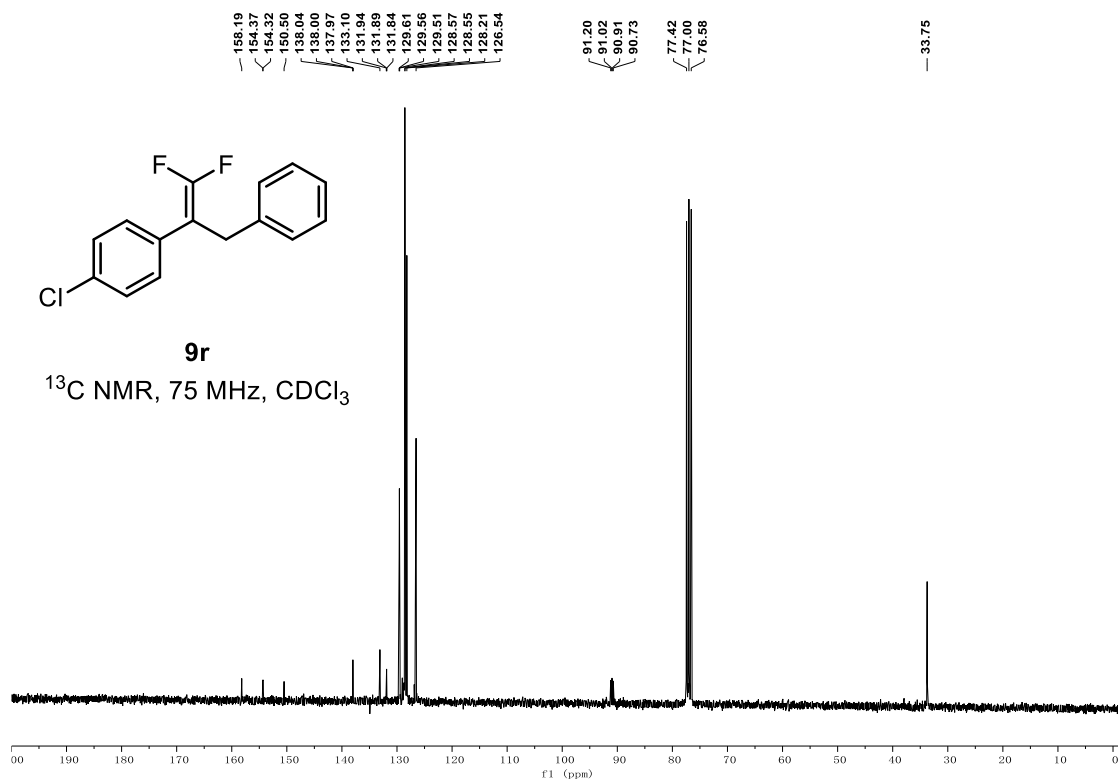

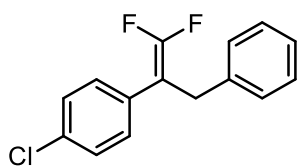

**9r**

$^{19}\text{F}$  NMR, 282 MHz,  $\text{CDCl}_3$

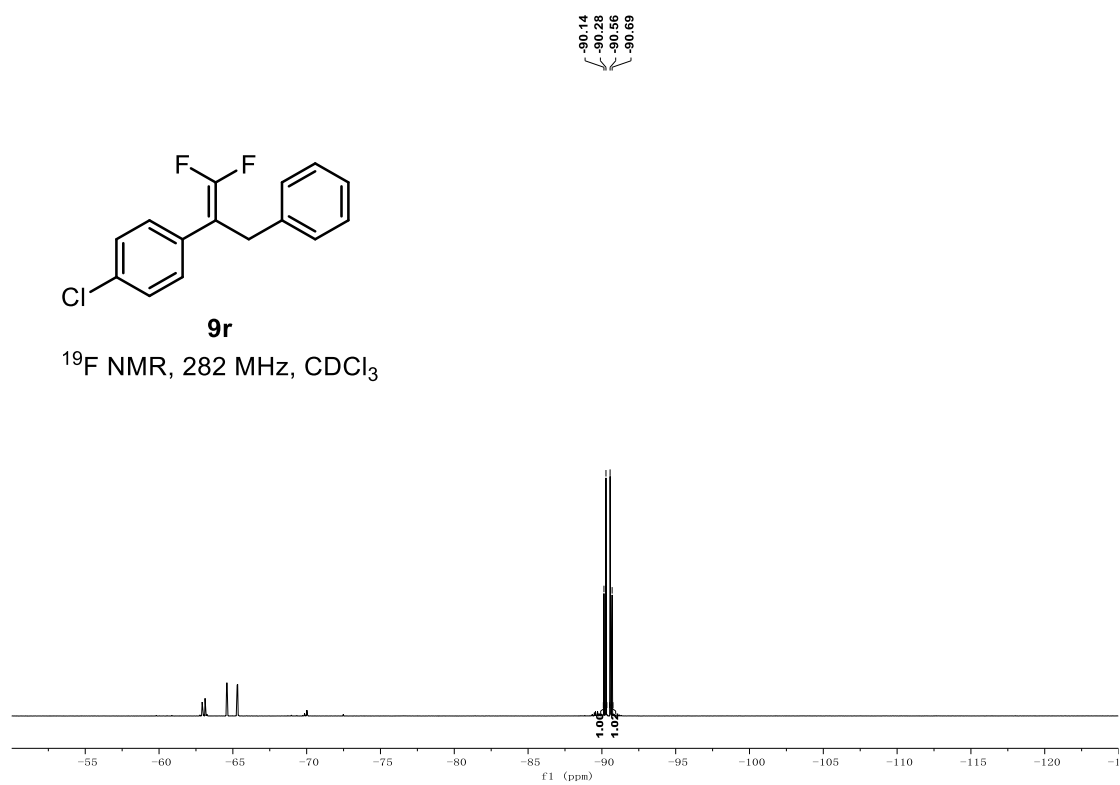



7.18  
7.18  
7.16  
7.15  
7.14  
7.14  
7.11  
7.11  
7.10  
7.10  
7.09  
7.09  
7.08  
7.08  
7.07  
7.07  
7.06  
6.74  
6.74  
6.72  
6.72  
6.71  
6.71

3.68  
3.62  
3.62  
3.61

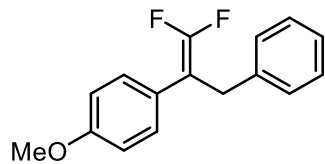

**9s**

$^1\text{H NMR}$ , 400 MHz,  $\text{CDCl}_3$

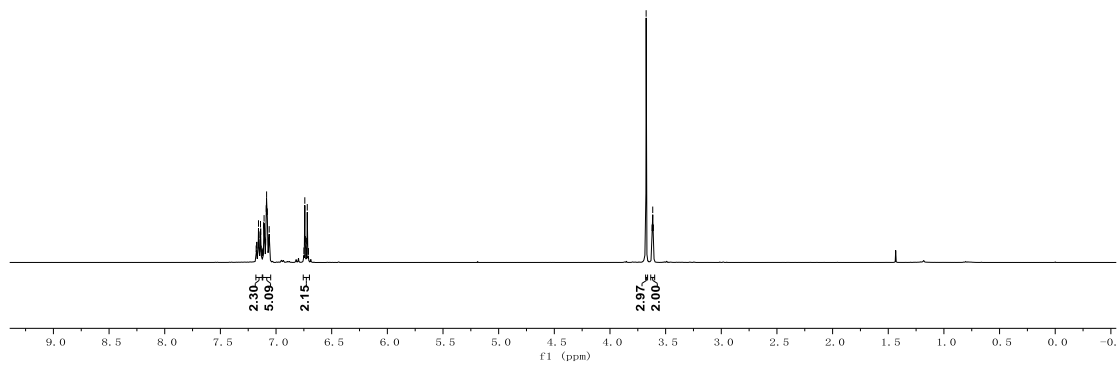

158.62  
157.10  
154.25  
154.21  
151.36  
138.59  
138.57  
138.54  
129.42  
129.38  
129.35  
128.43  
128.27  
126.33  
113.79

91.30  
91.16  
91.09  
90.95

77.32  
77.00  
76.68

55.15

34.01  
33.96

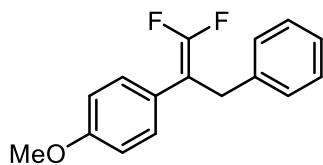

**9s**

$^{13}\text{C NMR}$ , 101 MHz,  $\text{CDCl}_3$

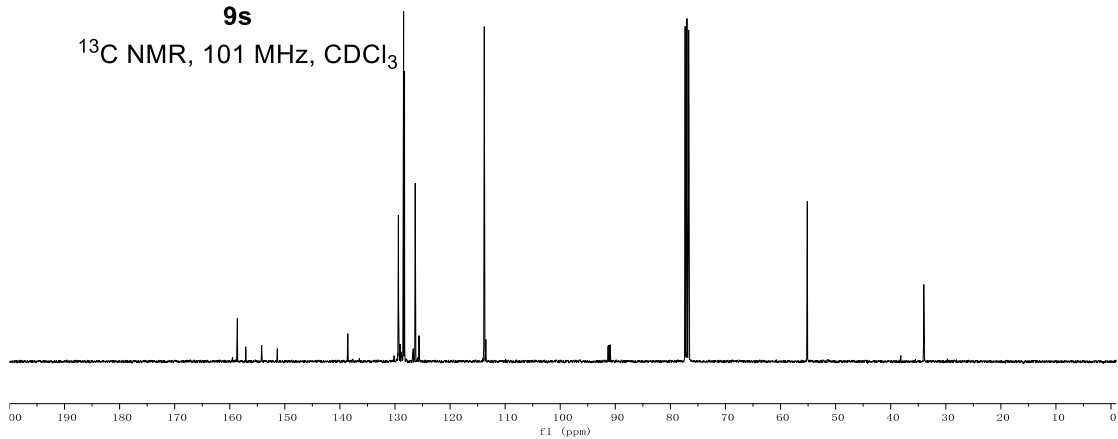

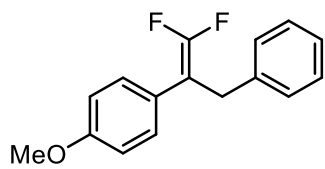

**9s**

$^{19}\text{F}$  NMR, 376 MHz,  $\text{CDCl}_3$

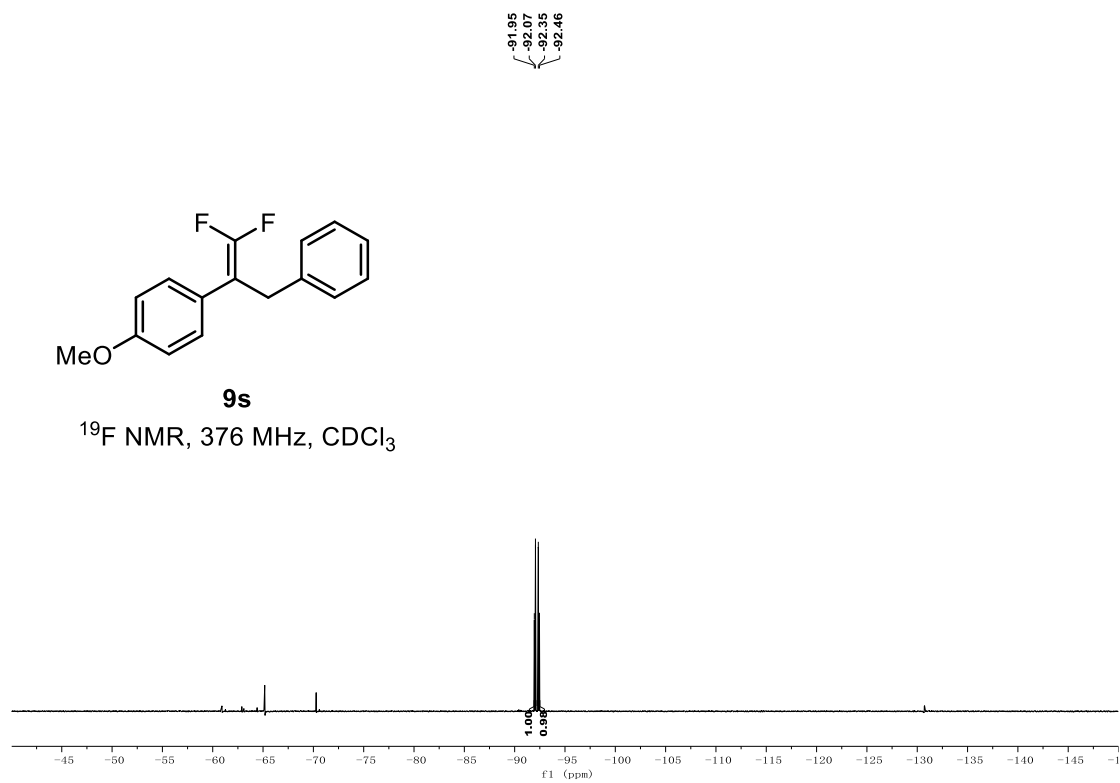

7.46  
7.45  
7.45  
7.44  
7.44  
7.43  
7.43  
7.42  
7.41  
7.40  
7.40  
7.39  
7.38  
7.38  
7.37  
7.37  
7.36  
7.36  
7.35  
7.35  
7.34  
7.34  
7.33  
7.33  
7.32  
7.32  
7.31  
7.31  
7.30  
7.30  
7.29  
7.29  
7.27  
7.26  
7.26  
7.25  
7.24  
7.24  
7.23  
7.22  
7.22  
7.21  
7.21  
7.20  
7.20  
7.19  
7.18  
7.17  
7.17  
7.16  
7.15  
7.15  
2.80  
2.80  
2.79  
2.78  
2.77  
2.77  
2.76  
2.75  
2.74  
2.74  
2.73  
2.73  
2.72  
2.71  
2.71  
2.69  
2.67  
2.66

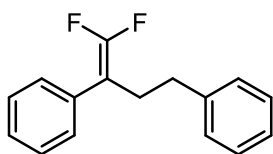

**9t**

$^1\text{H NMR}$ , 300 MHz,  $\text{CDCl}_3$

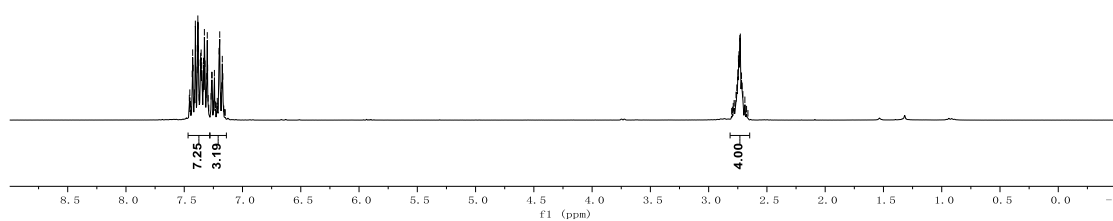

156.59  
153.74  
153.70  
150.85  
141.00  
133.50  
133.47  
133.45  
133.42  
133.05  
128.48  
128.38  
128.35  
128.31  
128.28  
128.25  
127.50  
126.07  
91.99  
91.95  
91.77  
91.64  
77.32  
77.00  
76.68  
34.04  
34.01  
33.99  
29.68  
29.66

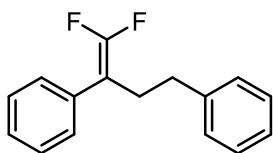

**9t**

$^{13}\text{C NMR}$ , 75 MHz,  $\text{CDCl}_3$

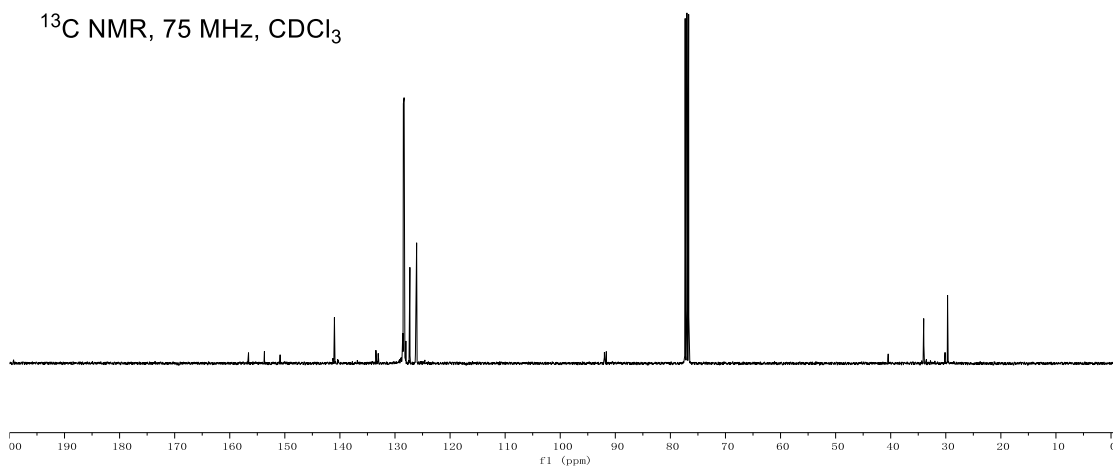

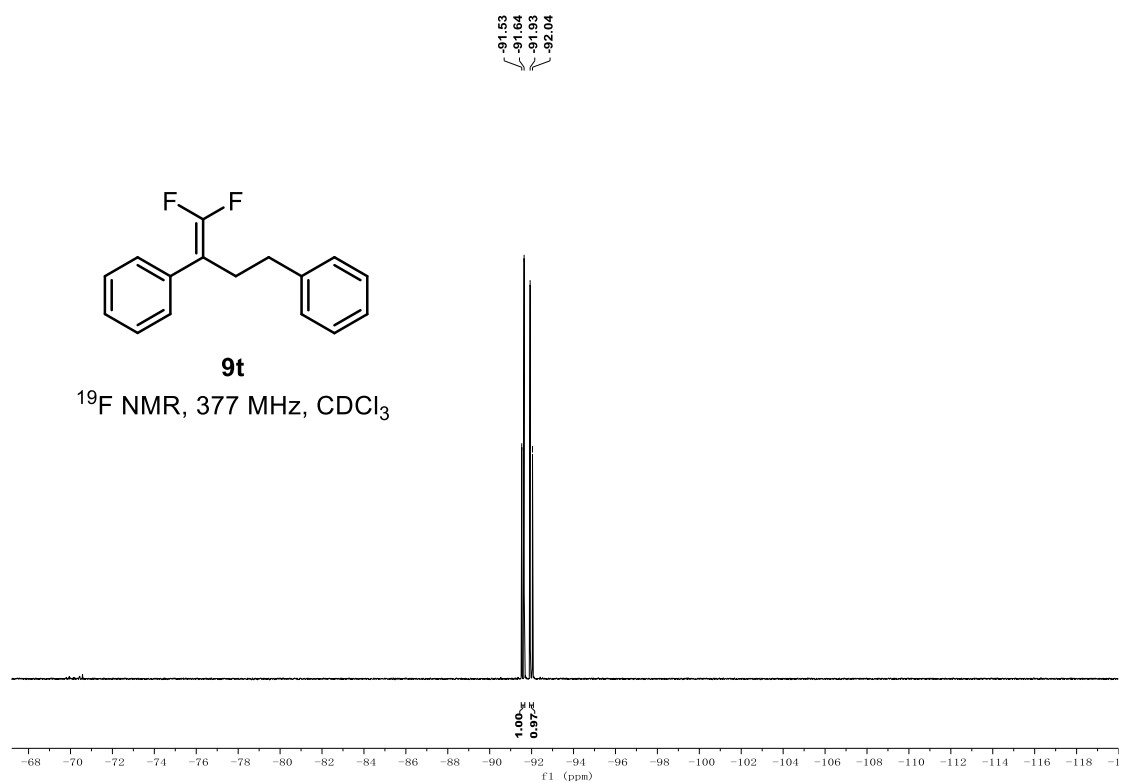

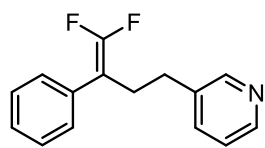

**9u**

<sup>1</sup>H NMR, 400 MHz, CDCl<sub>3</sub>

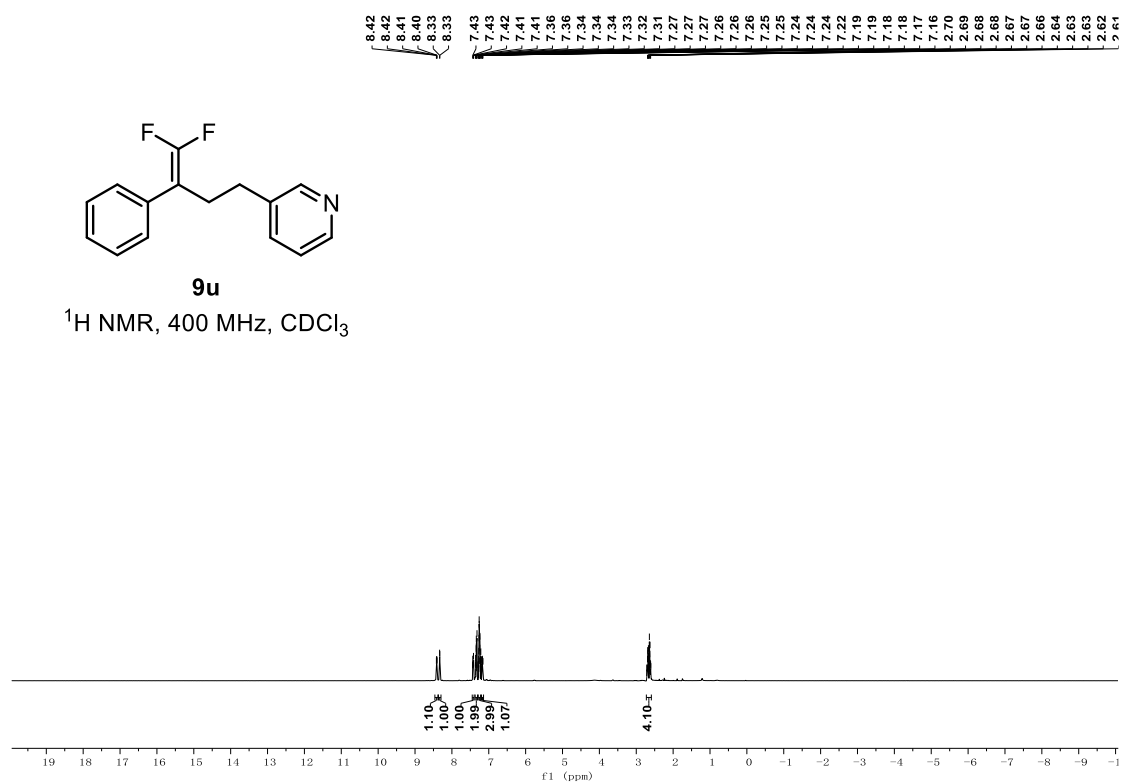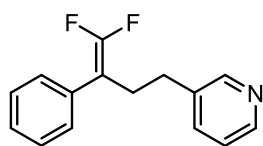

**9u**

<sup>13</sup>C NMR, 101 MHz, CDCl<sub>3</sub>

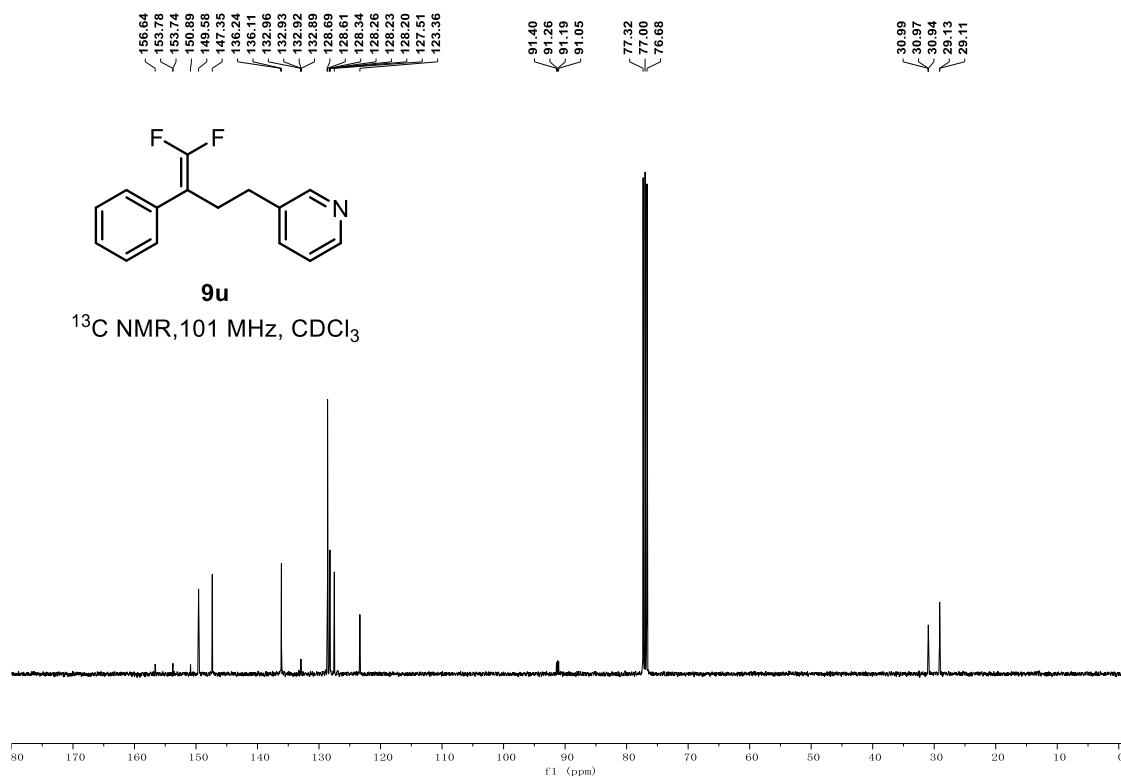

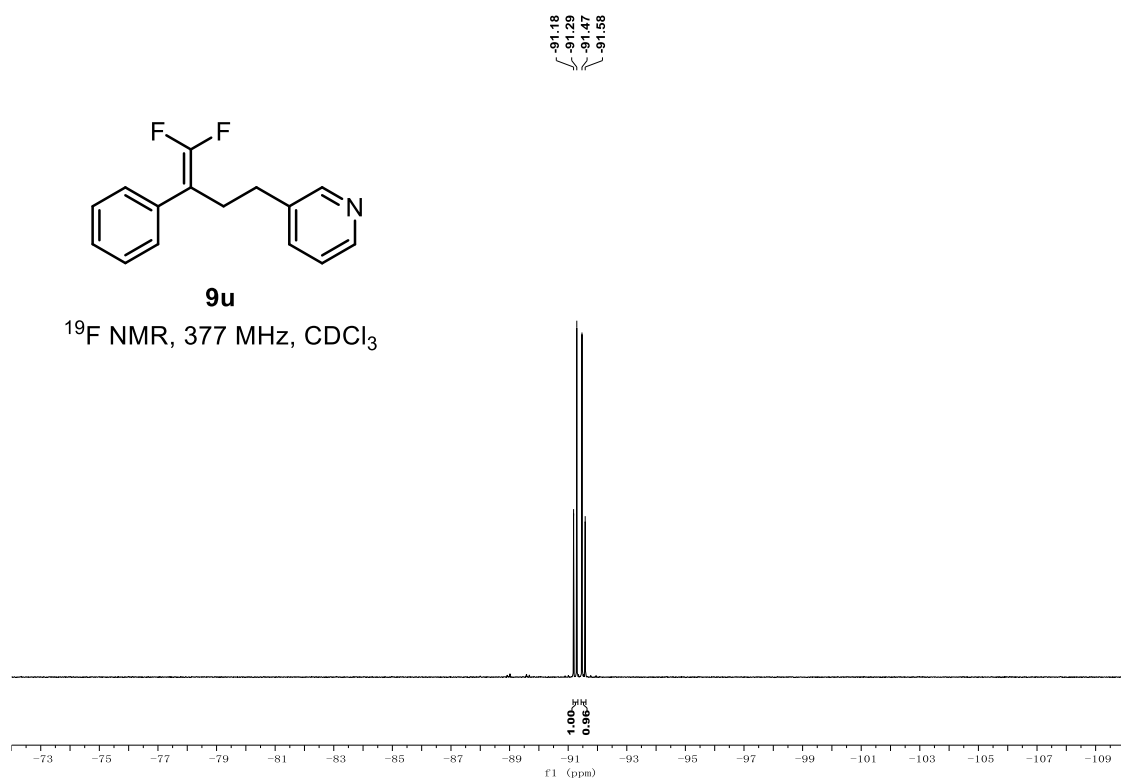

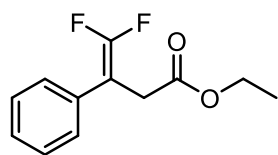

**9v**

$^1\text{H}$  NMR, 300 MHz,  $\text{CDCl}_3$

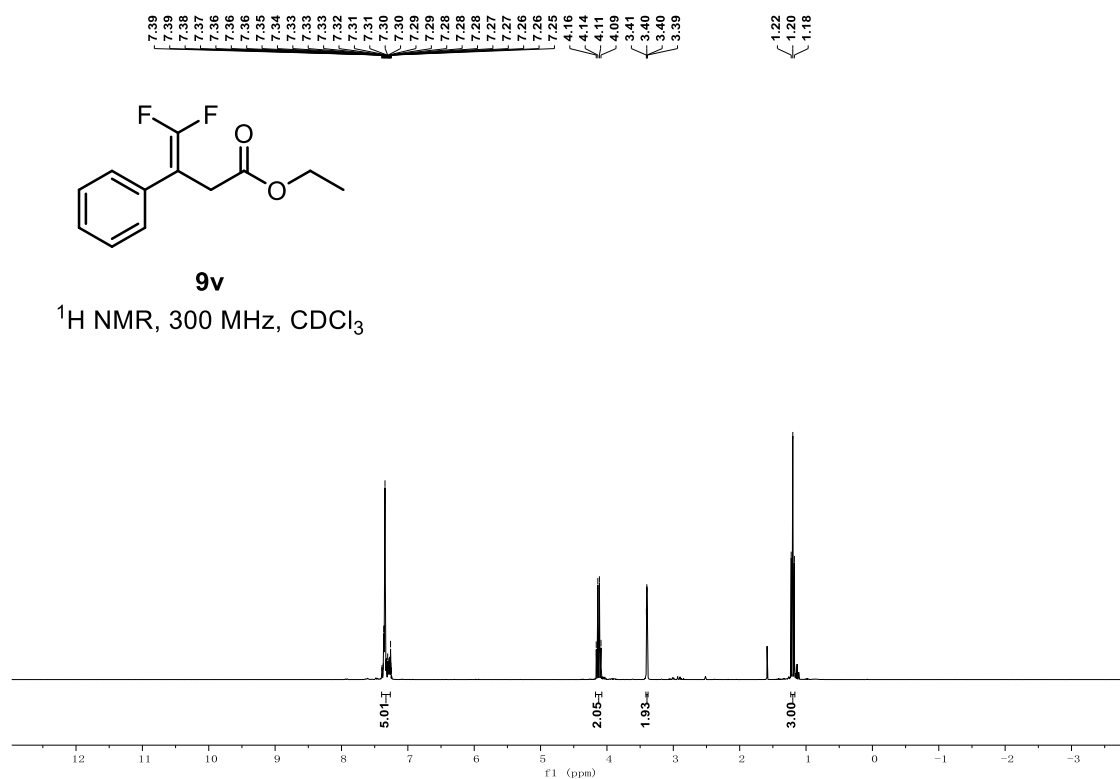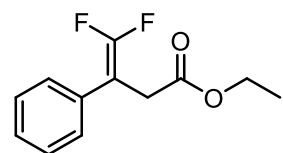

**9v**

$^{13}\text{C}$  NMR, 75 MHz,  $\text{CDCl}_3$

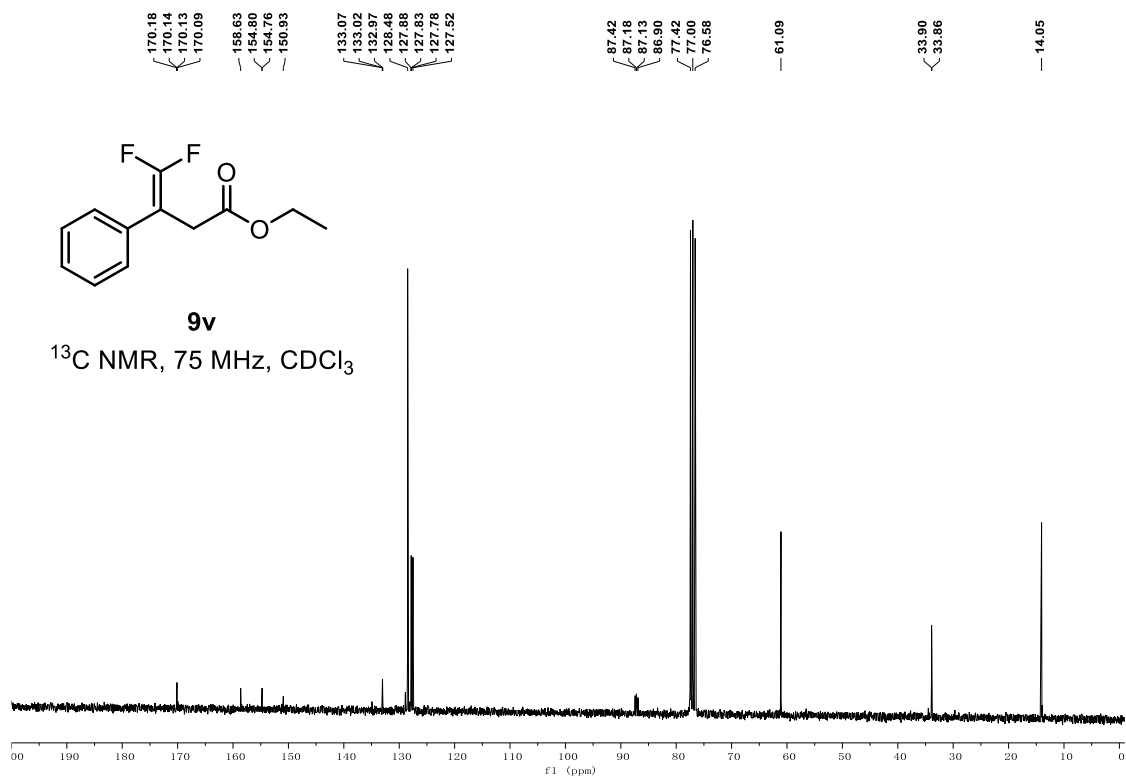

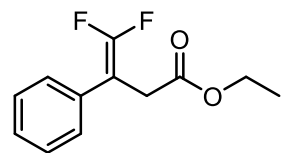

**9v**

$^{19}\text{F}$  NMR, 282 MHz,  $\text{CDCl}_3$

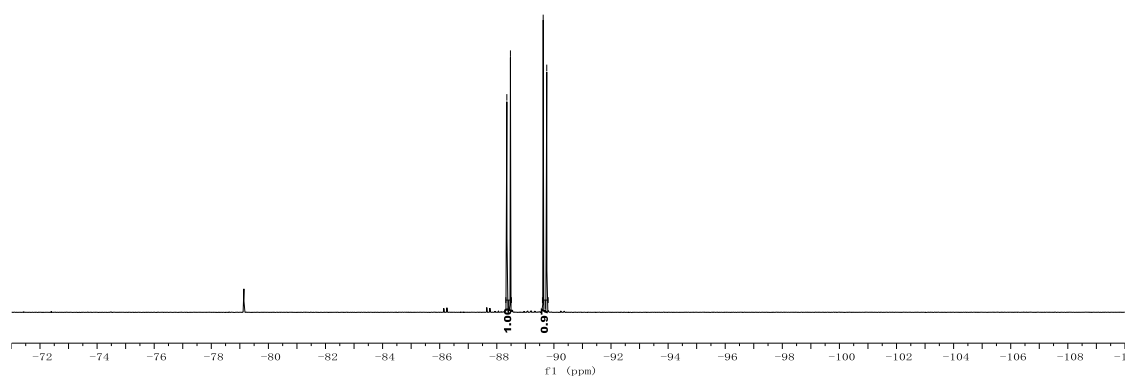

-88.35  
-88.48  
-89.62  
-89.75



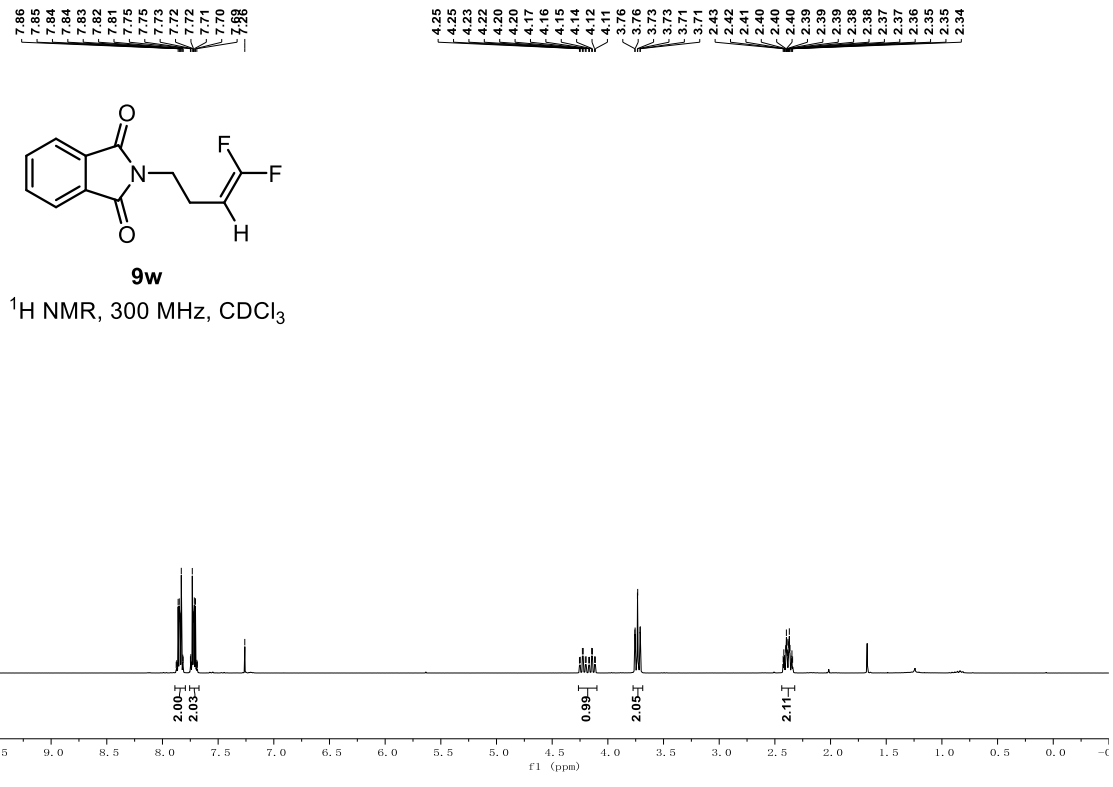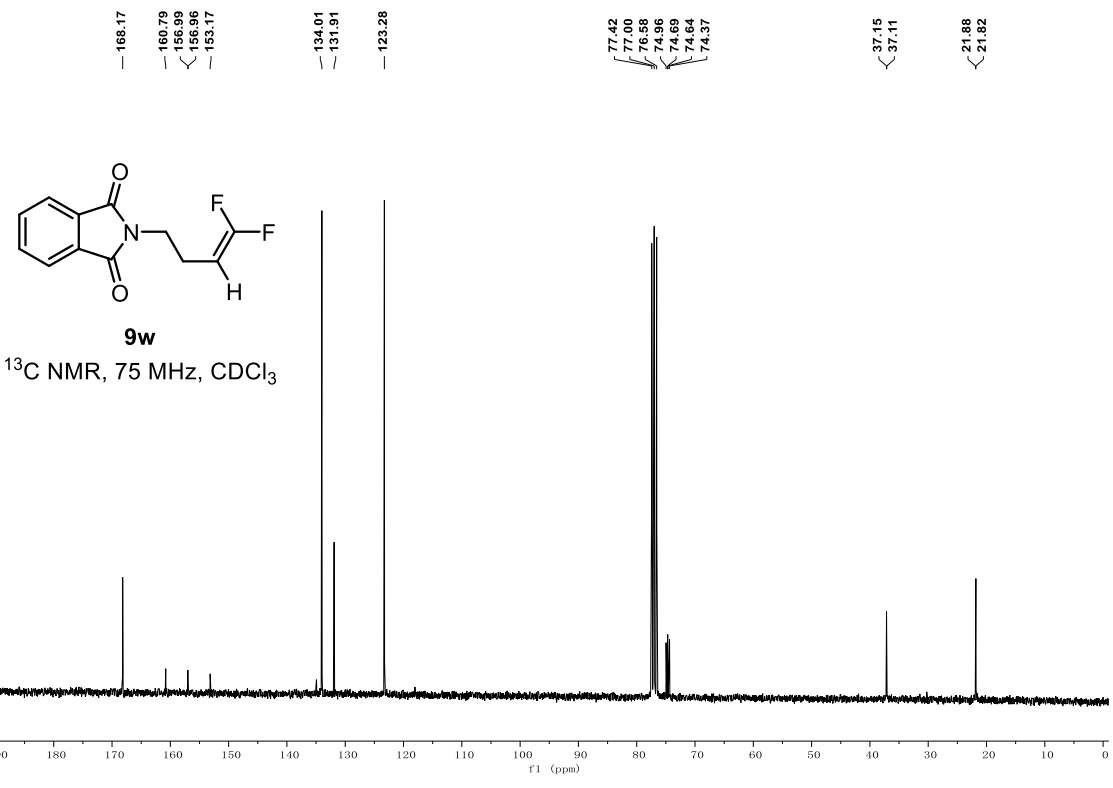

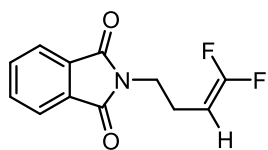

**9w**

$^{19}\text{F}$  NMR, 282 MHz,  $\text{CDCl}_3$

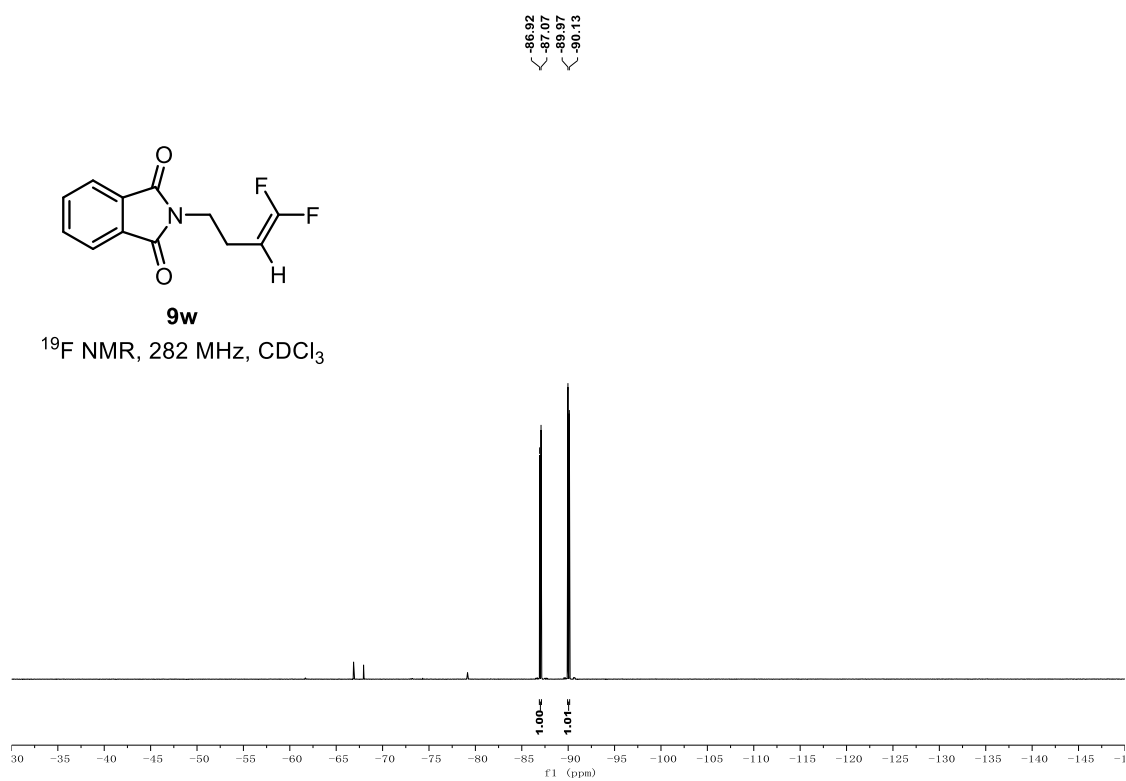

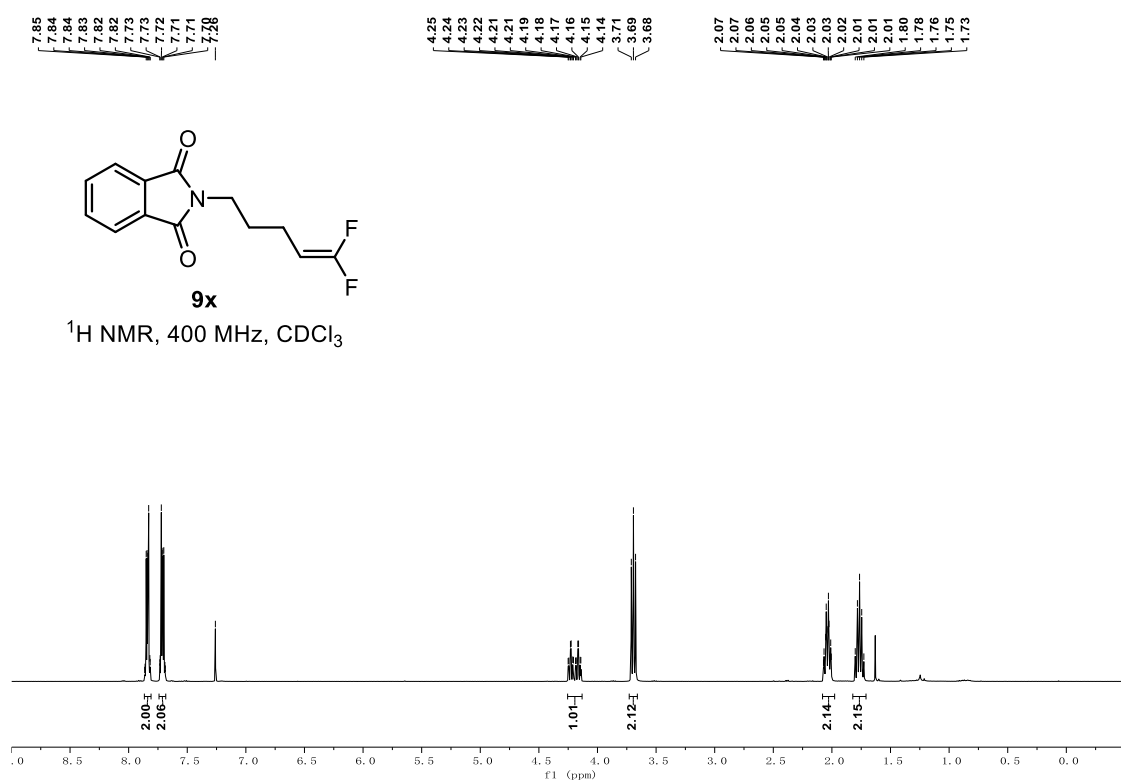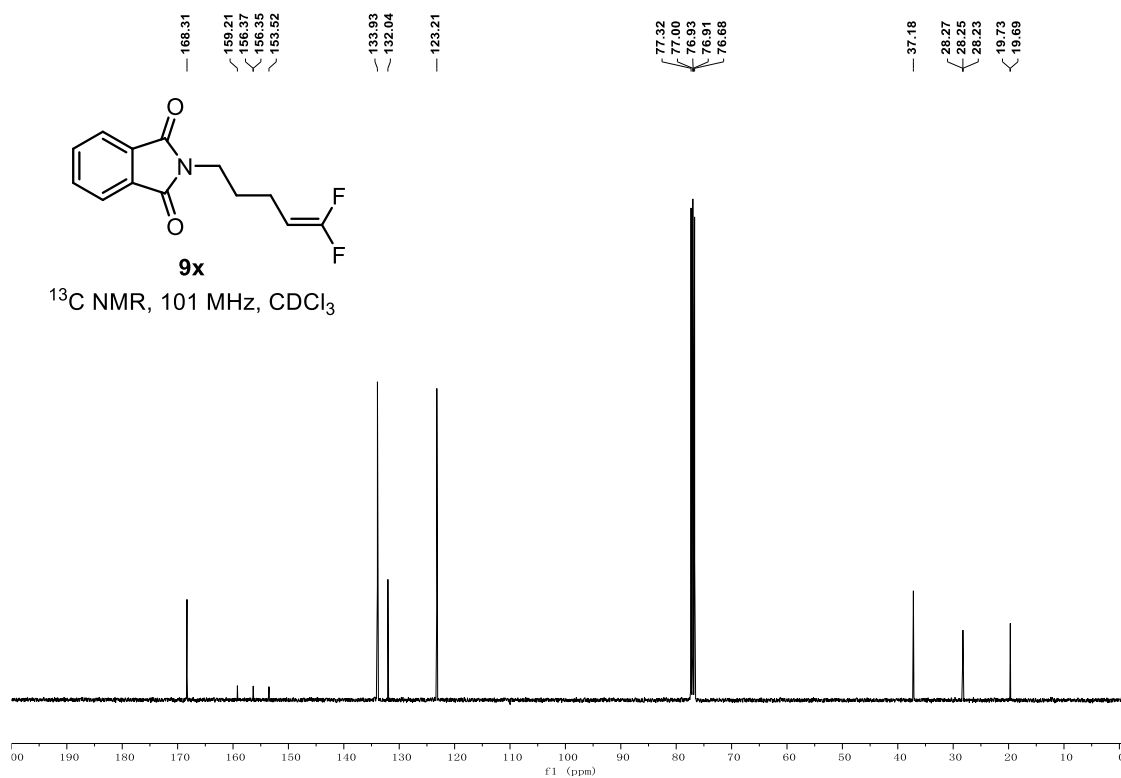

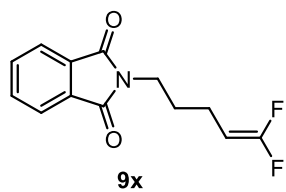

$^{19}\text{F}$  NMR, 377 MHz,  $\text{CDCl}_3$

88.85  
88.98  
-91.07  
-91.19

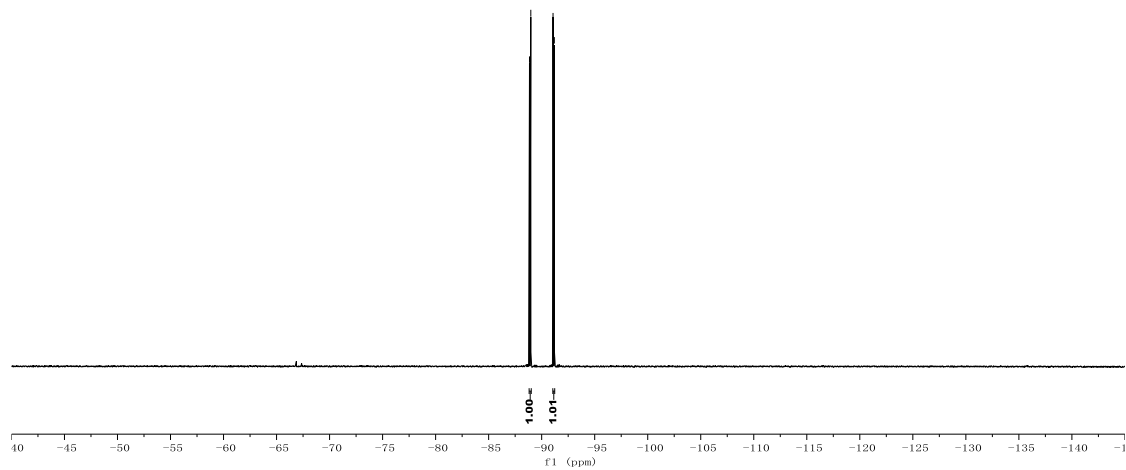

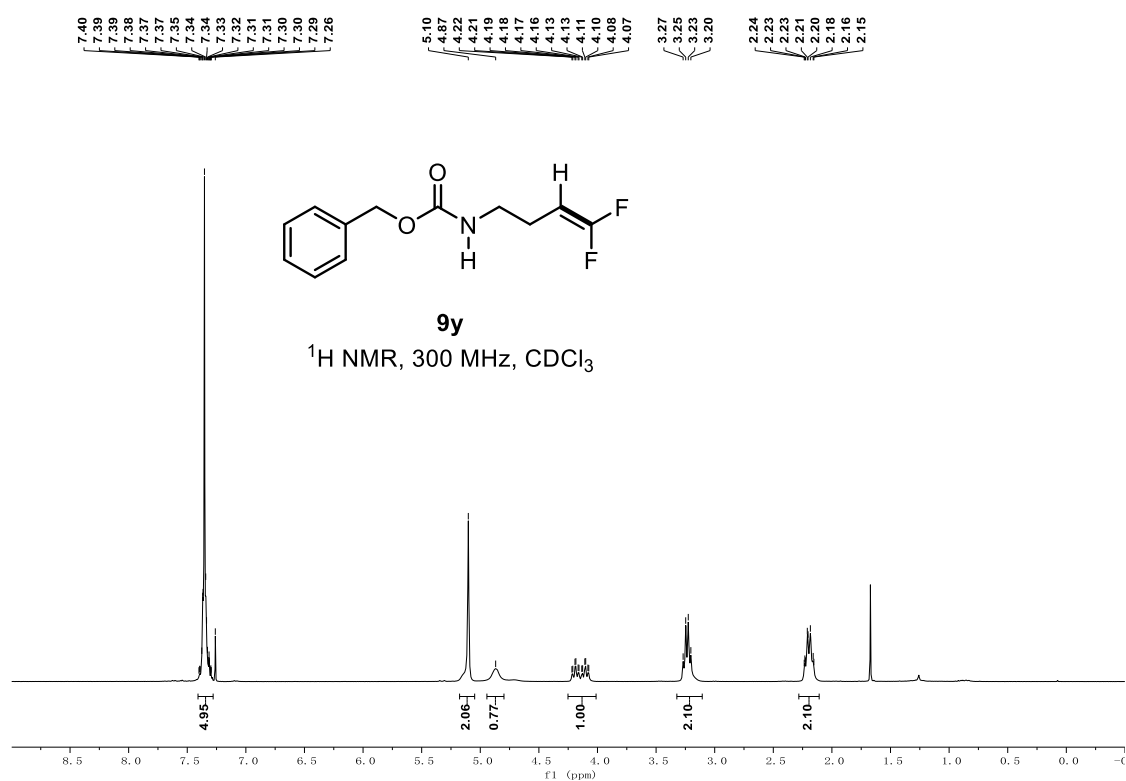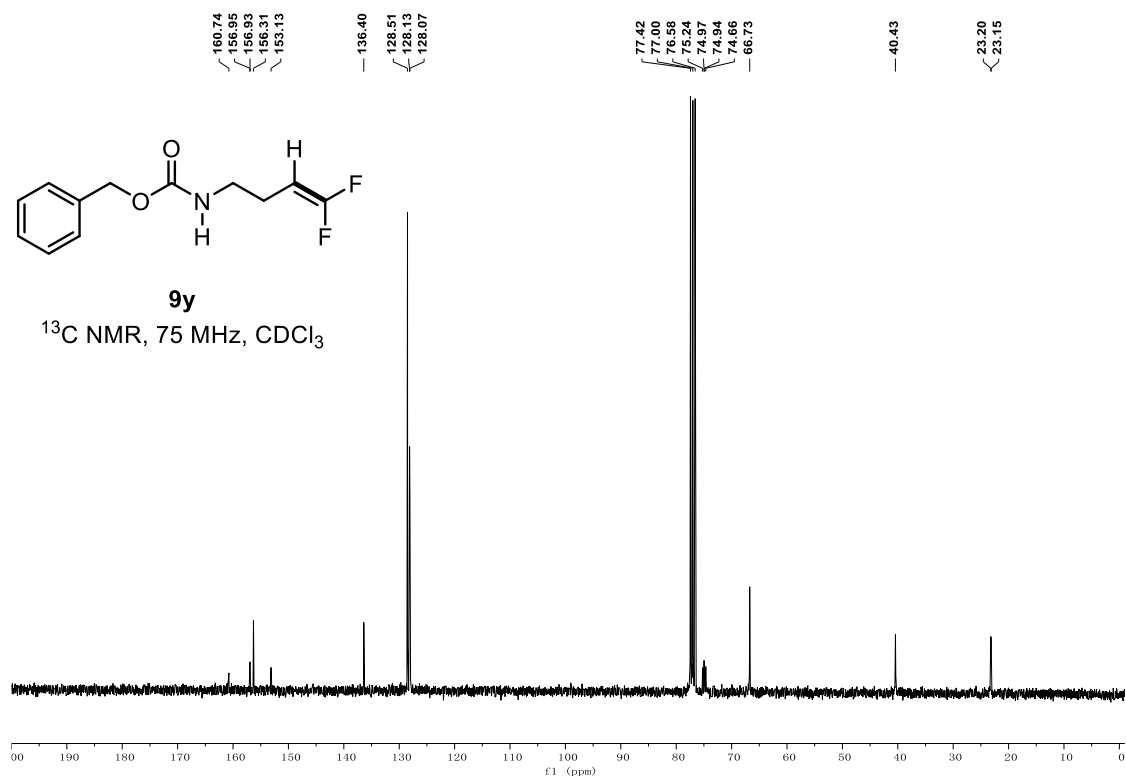

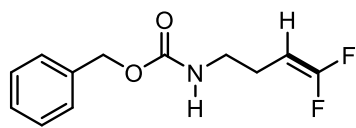

**9y**

$^{19}\text{F}$  NMR, 282 MHz,  $\text{CDCl}_3$

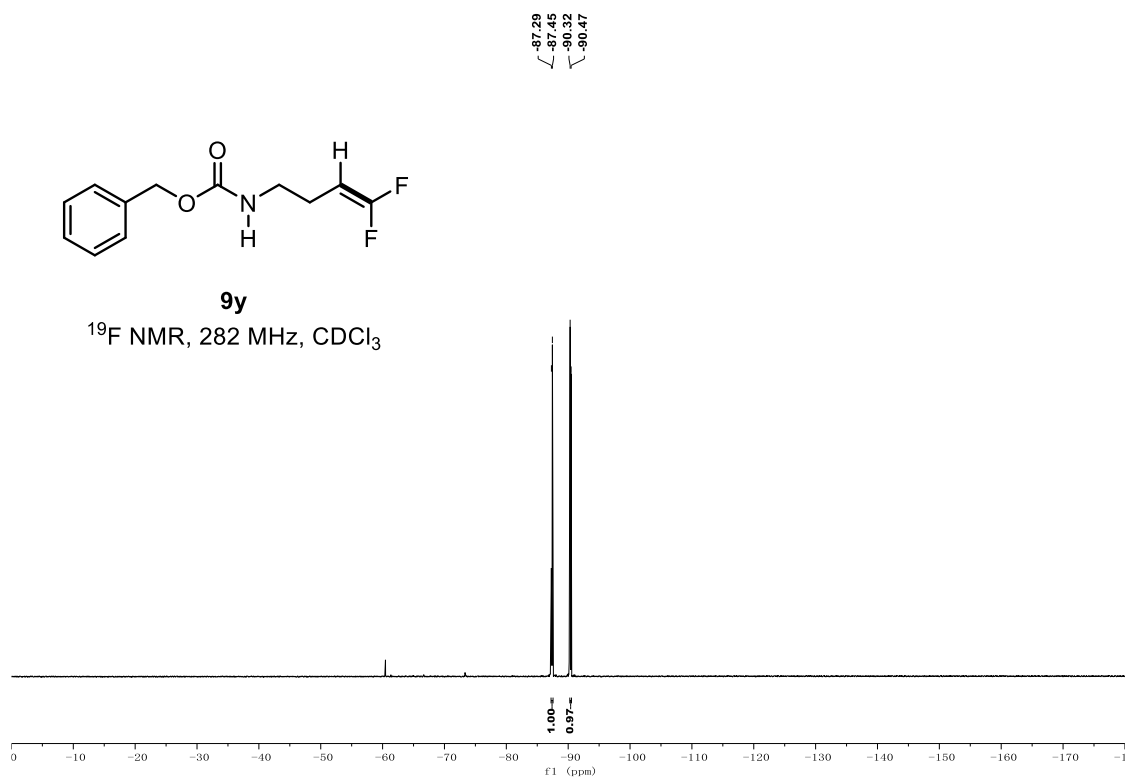

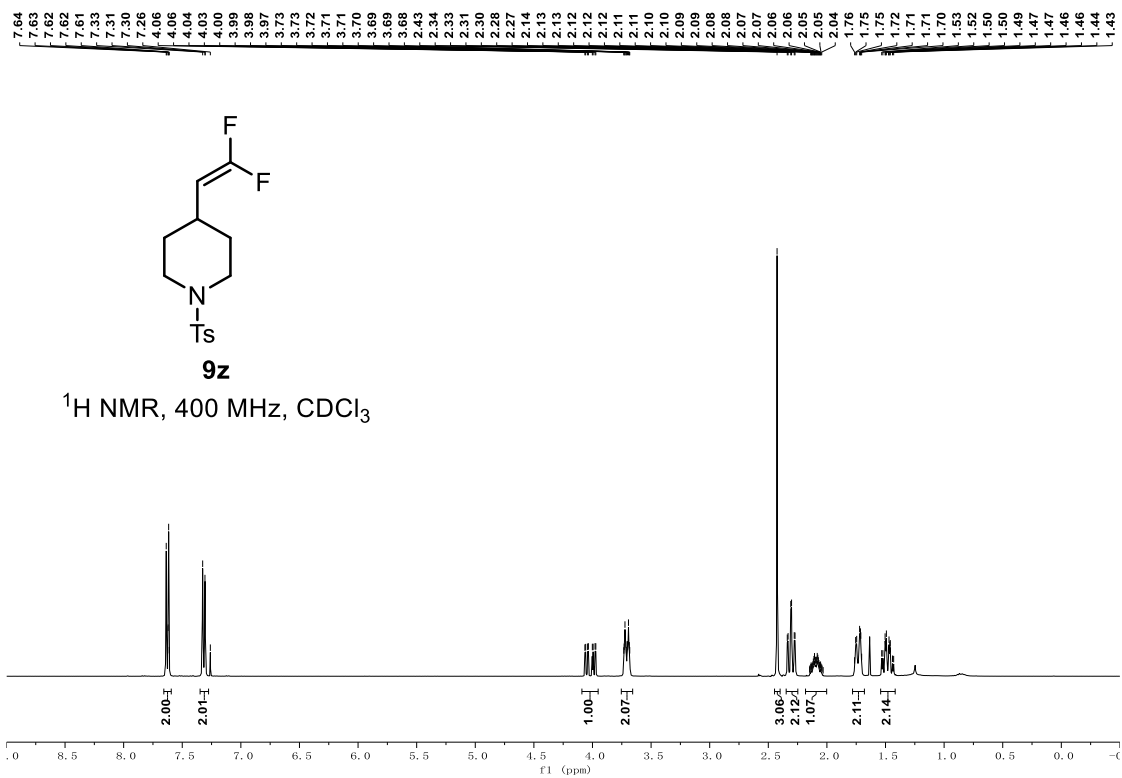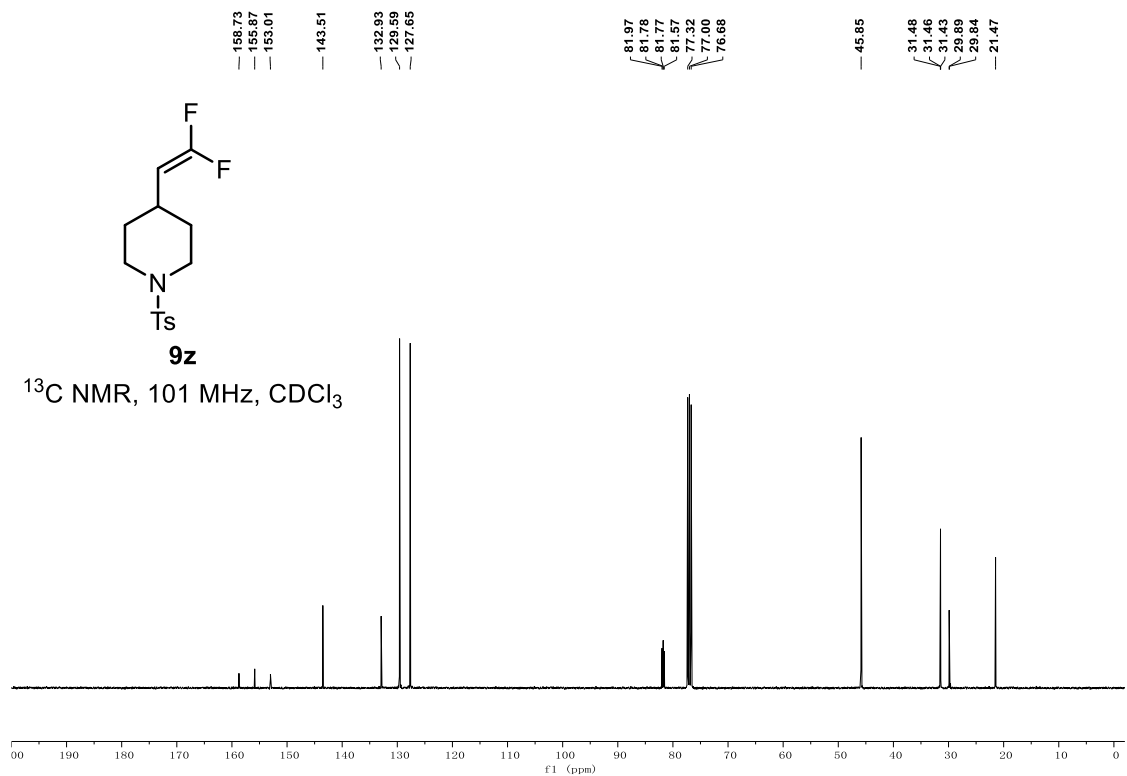

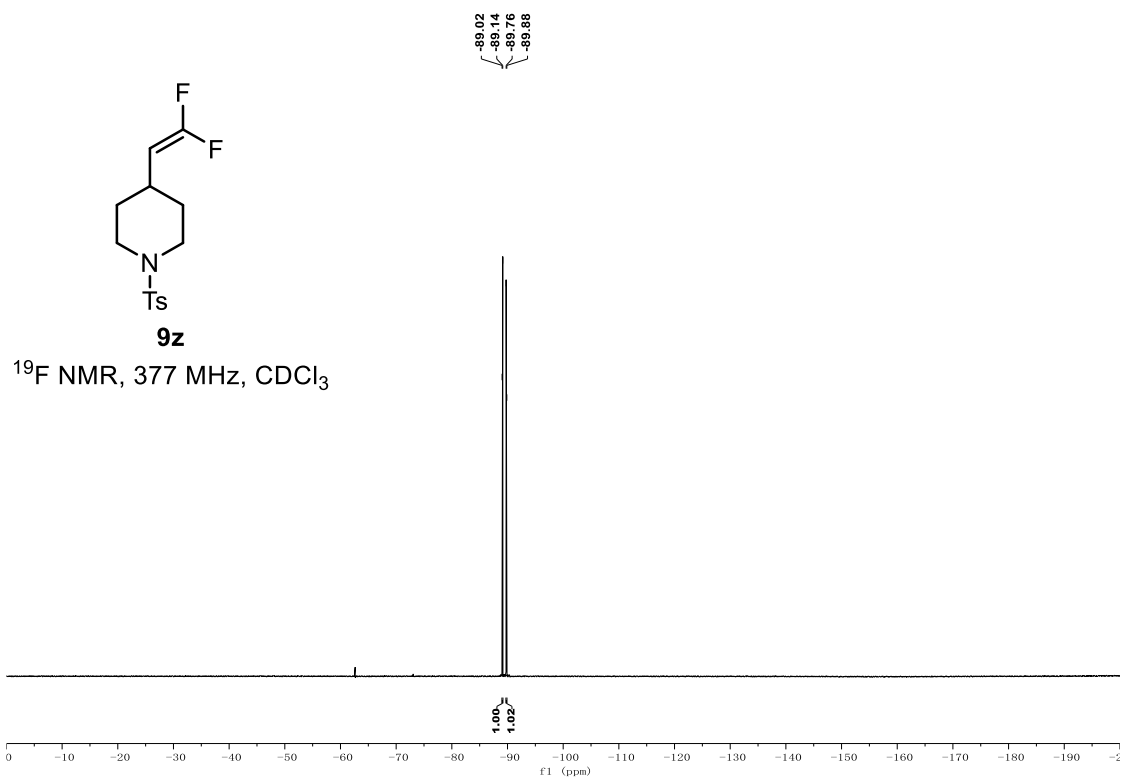



7.24  
7.24  
7.24  
7.23  
7.22  
7.21  
7.20  
7.20  
7.16  
7.16  
7.15  
7.15  
7.14  
7.13  
7.12  
7.12  
7.11  
7.10  
7.10  
7.08  
7.08  
7.08  
7.08  
4.82  
4.81  
4.80  
4.79  
4.79  
4.73  
4.73  
4.71  
4.70  
4.67  
4.65  
4.64

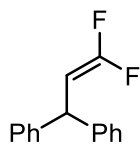

**9aa**

$^1\text{H NMR}$ , 400 MHz,  $\text{CDCl}_3$

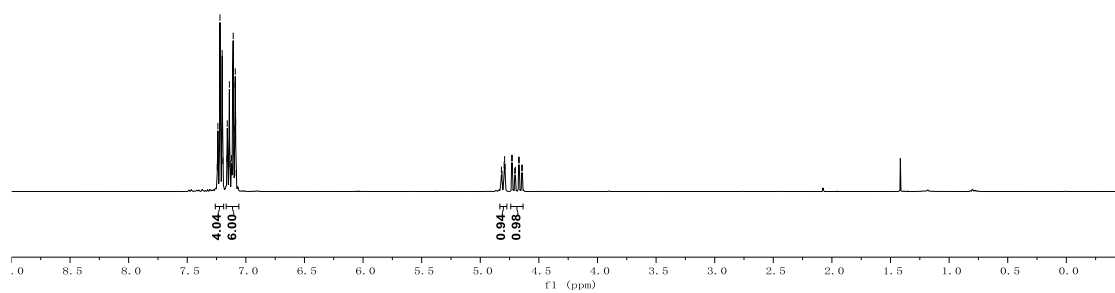

158.82  
155.96  
155.95  
153.09

143.11  
143.09  
143.07

128.60  
127.89  
126.69

82.20  
82.01  
81.96  
81.79  
77.32  
77.00  
76.68

44.54  
44.49

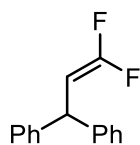

**9aa**

$^{13}\text{C NMR}$ , 101 MHz,  $\text{CDCl}_3$

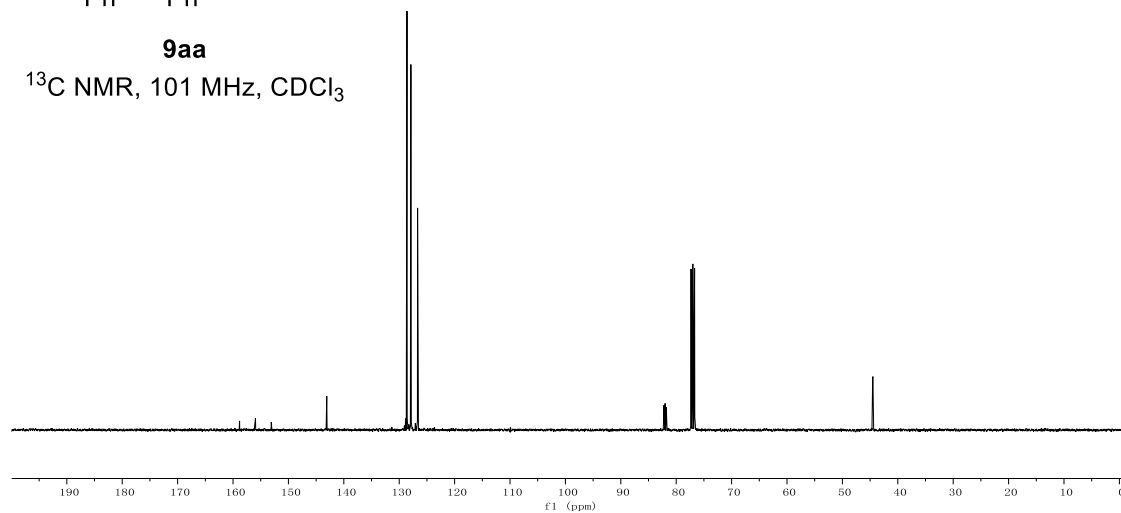

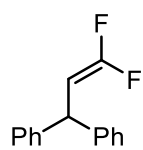

**9aa**

<sup>19</sup>F NMR, 377 MHz, CDCl<sub>3</sub>

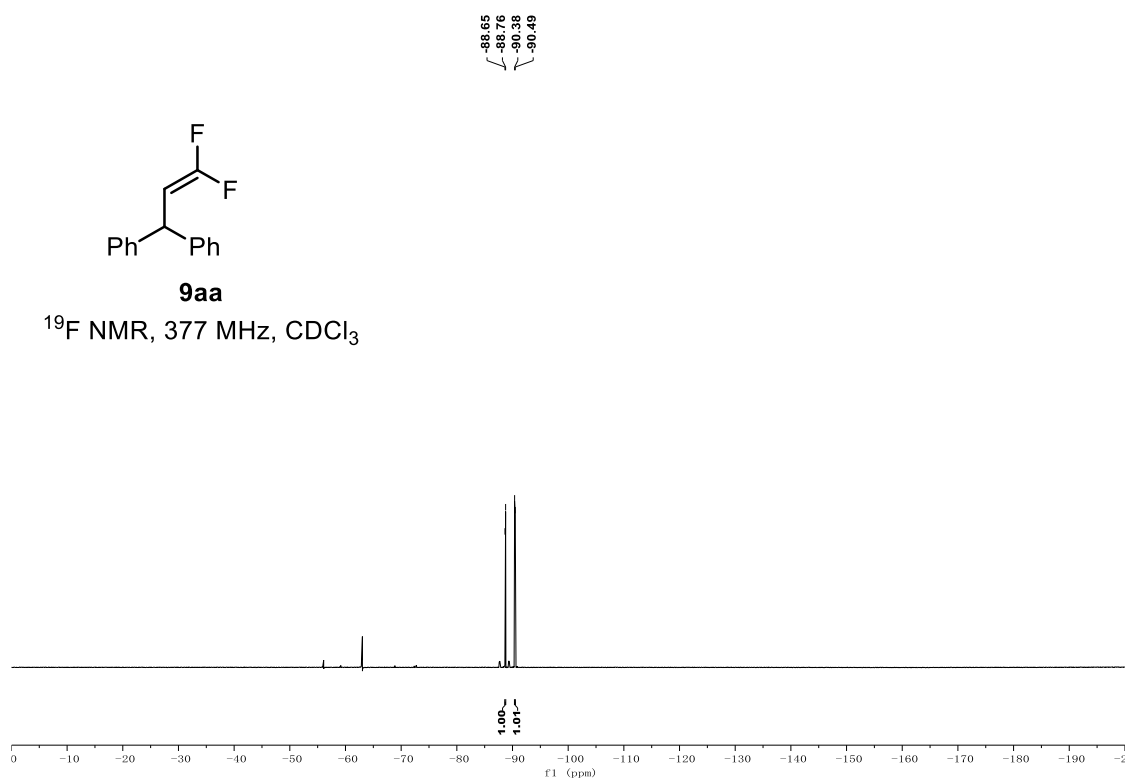

7.71  
7.70  
7.70  
7.68  
7.68  
7.67  
7.56  
7.56  
7.55  
7.55  
7.32  
7.32  
7.29  
7.29  
7.26  
7.26  
7.16  
7.15  
7.13  
7.13  
7.12

3.92

2.87  
2.84  
2.84  
2.82  
2.39  
2.38  
2.37  
2.37  
2.36  
2.35  
2.35  
2.34  
2.34  
2.33  
2.32  
1.82  
1.82  
1.81

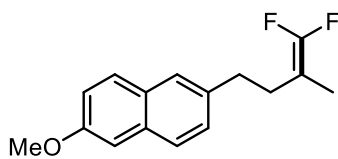

**9ab**

$^1\text{H NMR}$ , 300 MHz,  $\text{CDCl}_3$

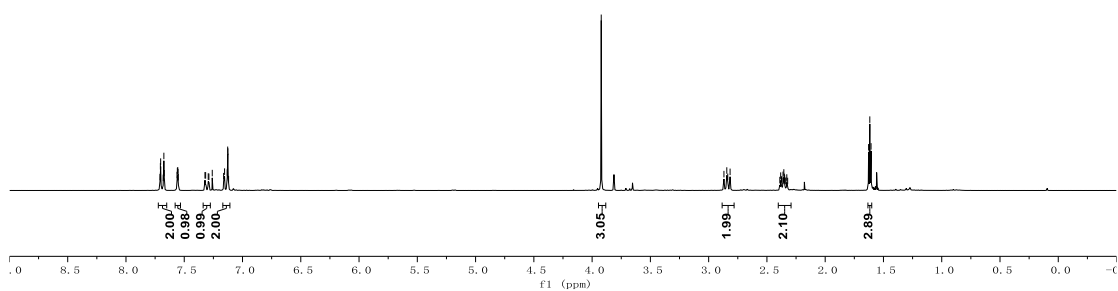

157.20  
156.69  
152.96  
152.95  
149.22

136.39  
133.05  
129.03  
128.90  
127.54  
126.79  
126.26  
118.72

105.59

84.48  
84.25  
84.25  
83.96  
77.42  
77.00  
76.58

55.25

33.61  
33.57  
33.54  
30.19  
30.16

12.05  
12.02  
11.99

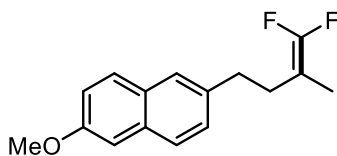

**9ab**

$^{13}\text{C NMR}$ , 75 MHz,  $\text{CDCl}_3$

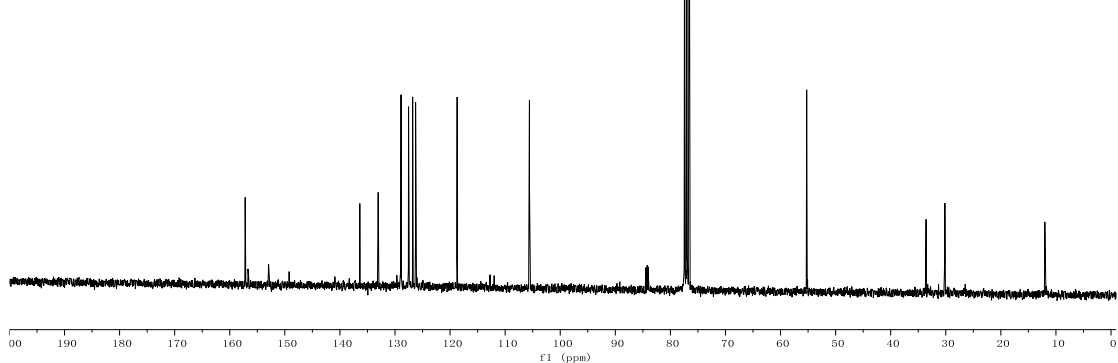

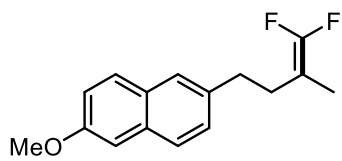

**9ab**

$^{19}\text{F}$  NMR, 282 MHz,  $\text{CDCl}_3$

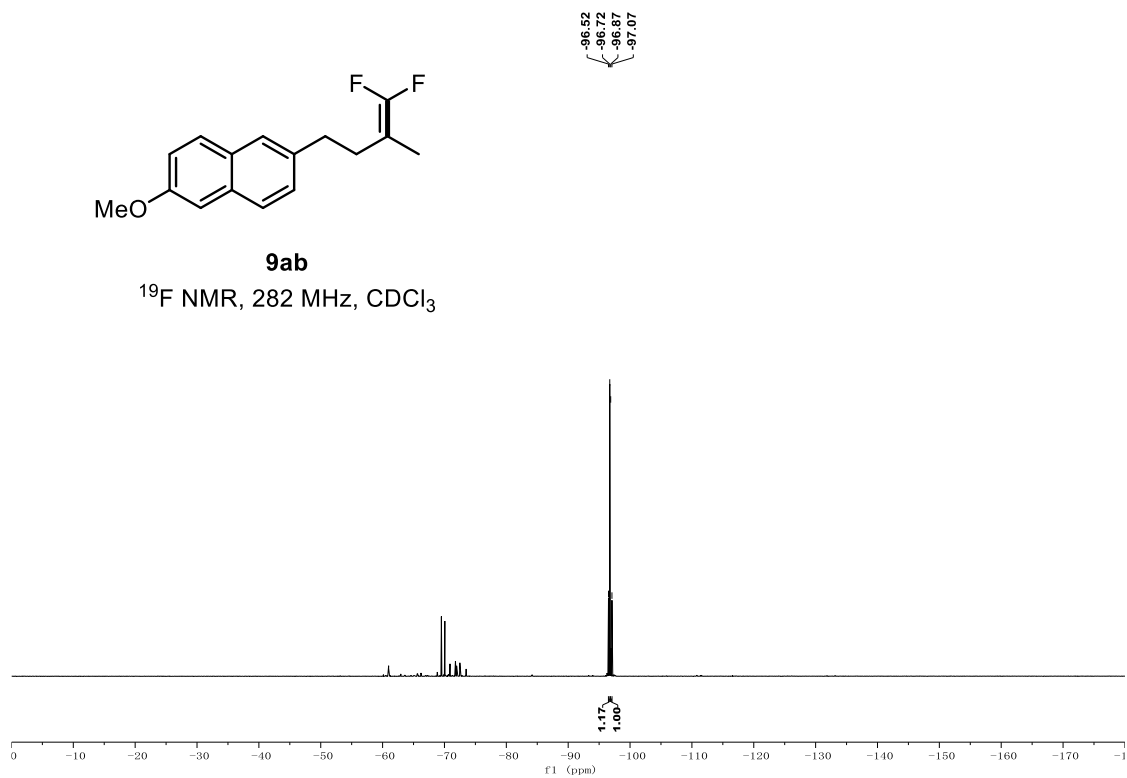

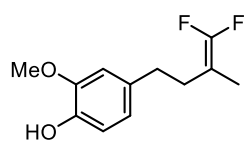

**9ac**

<sup>1</sup>H NMR, 400 MHz, CDCl<sub>3</sub>

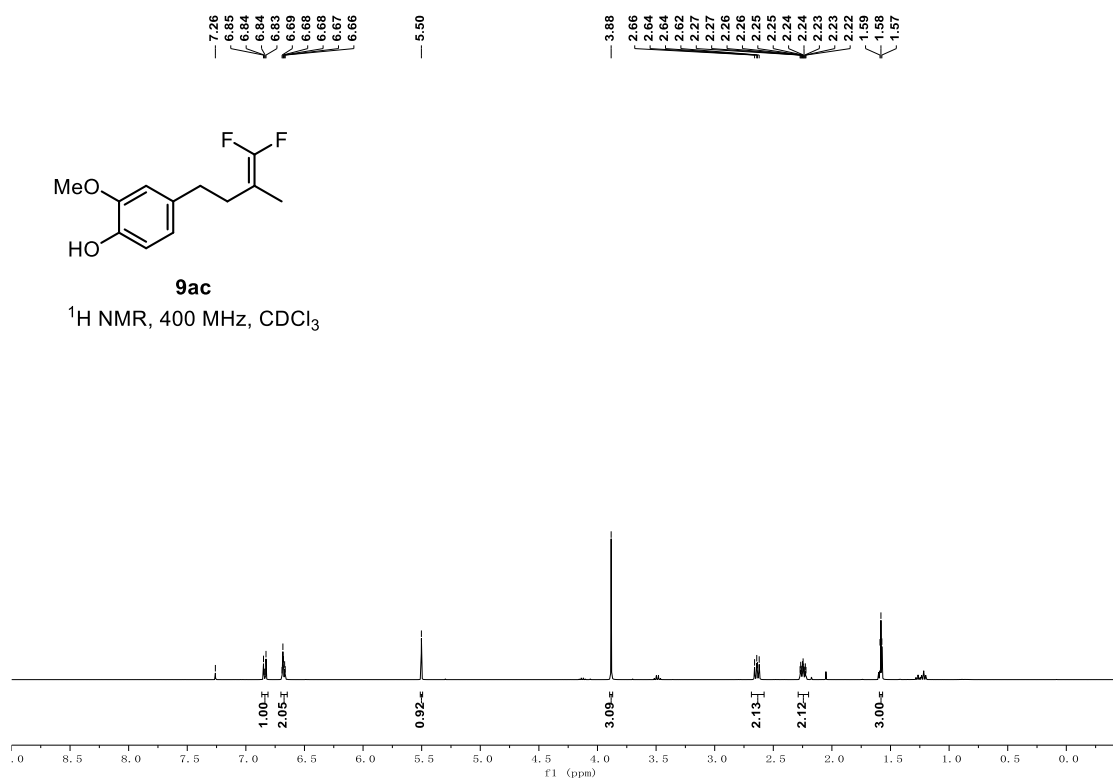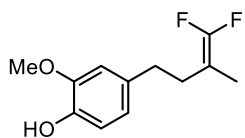

**9ac**

<sup>13</sup>C NMR, 101 MHz, CDCl<sub>3</sub>

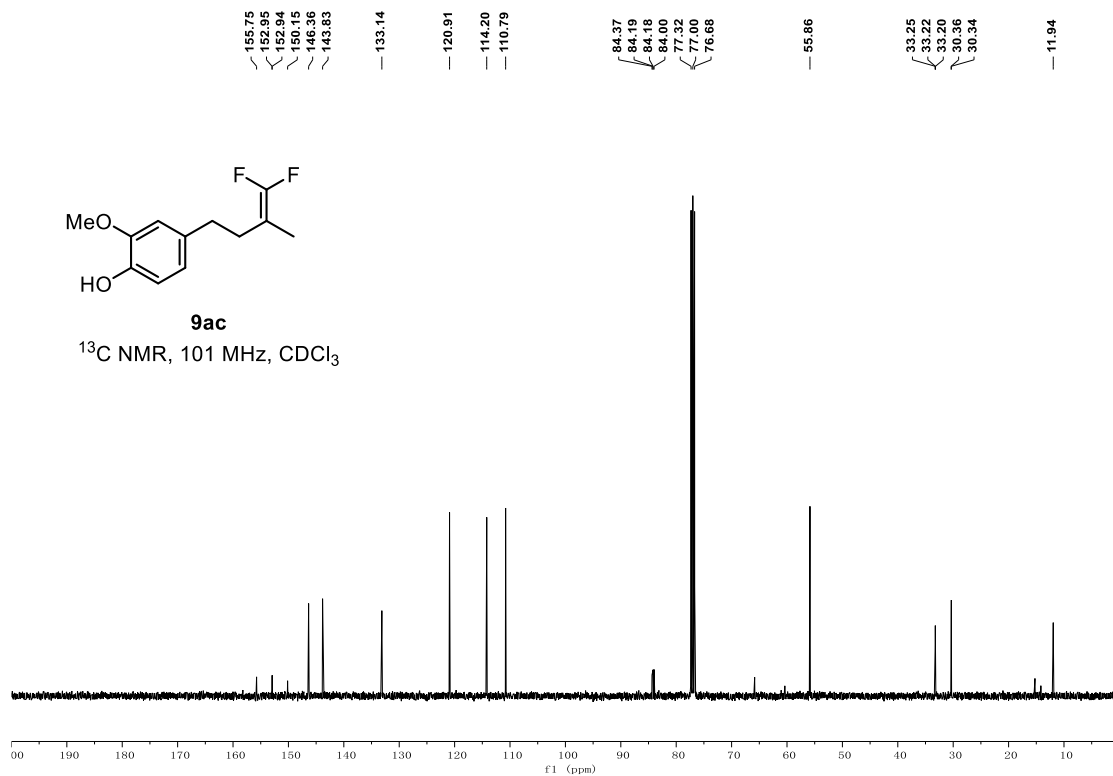

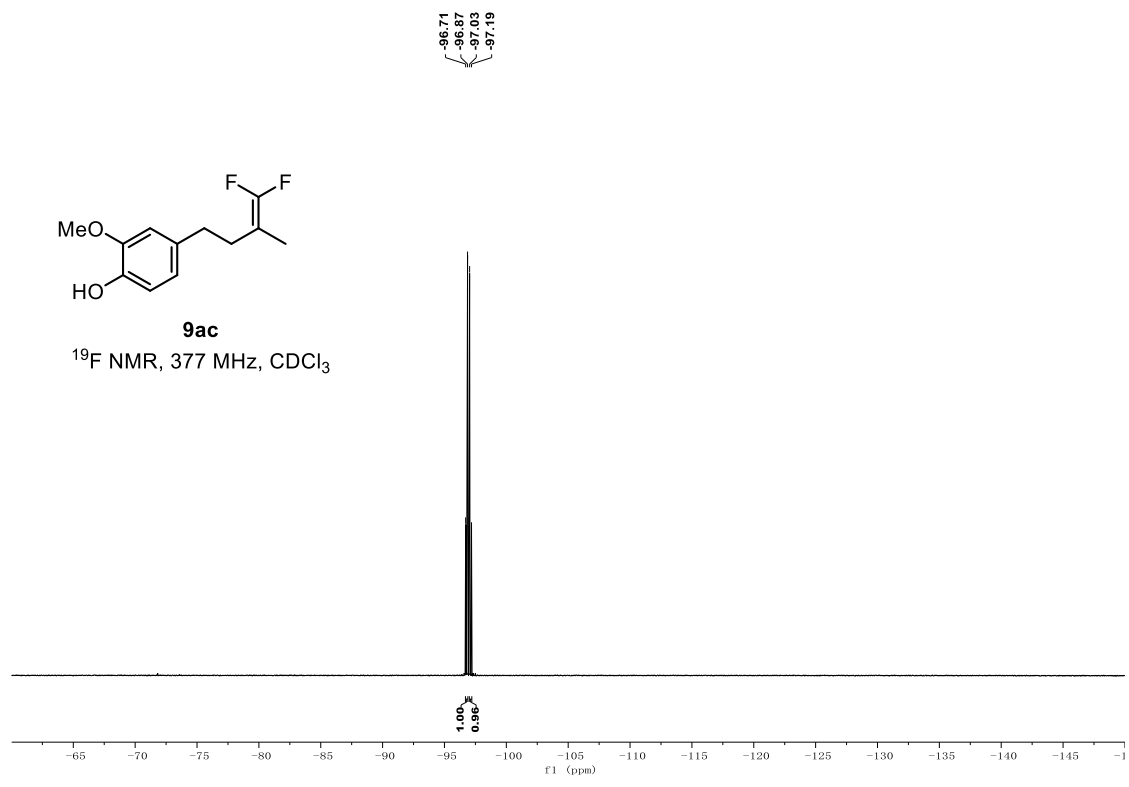

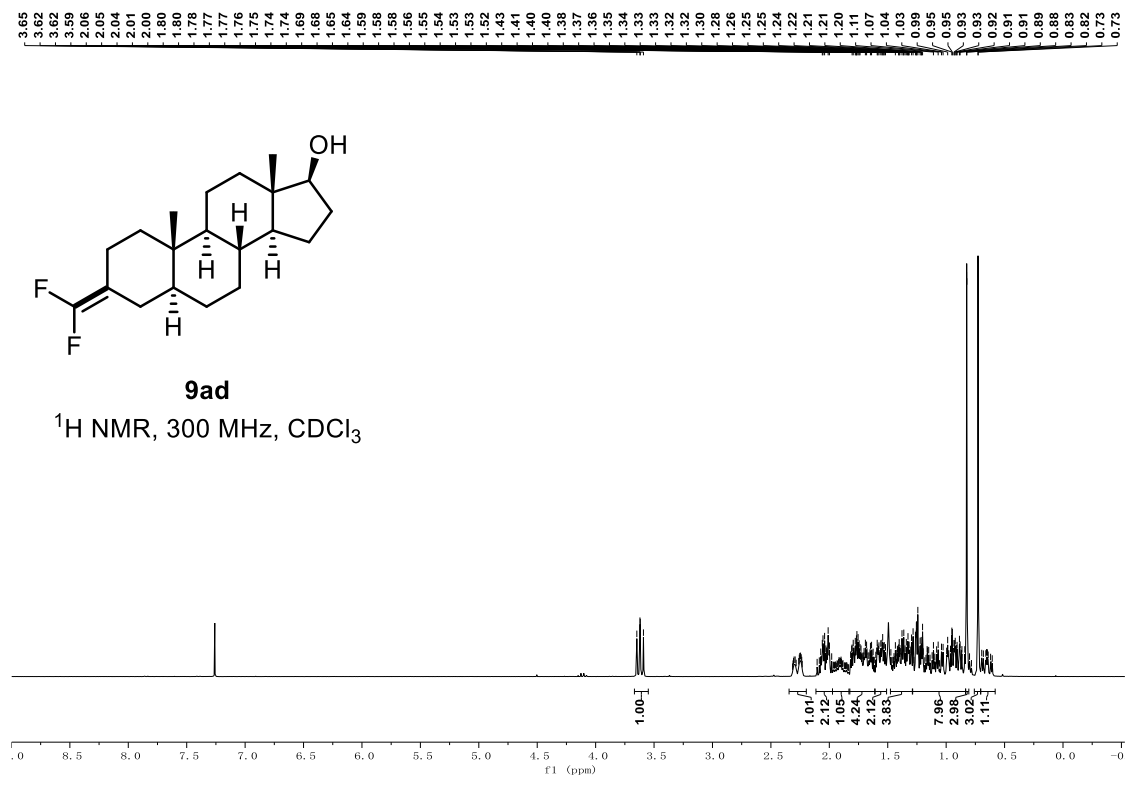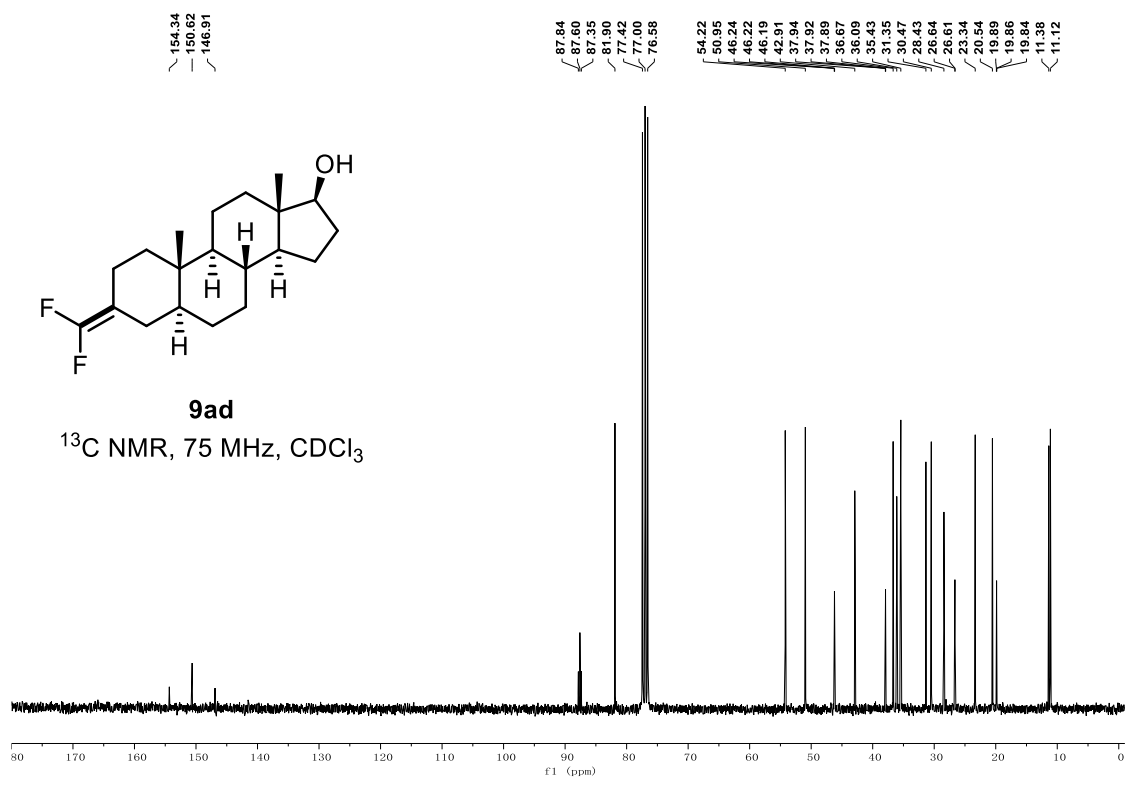

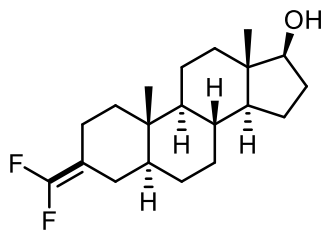

**9ad**

$^{19}\text{F}$  NMR, 282 MHz,  $\text{CDCl}_3$

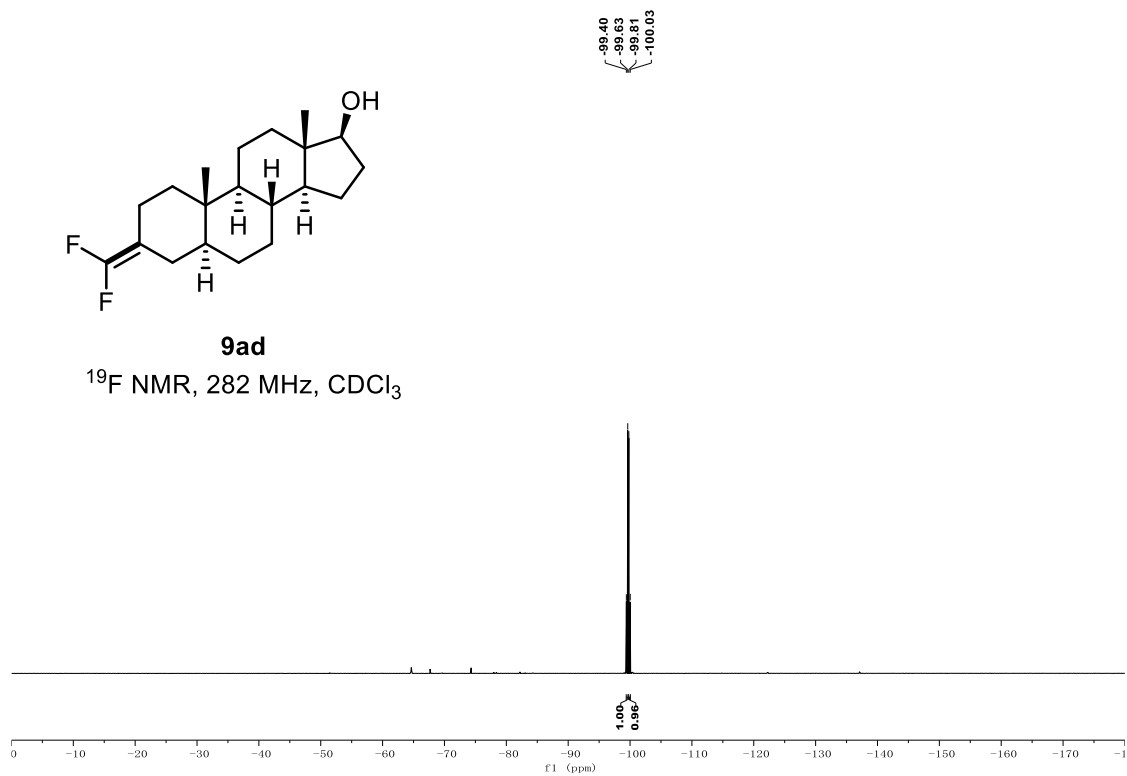



7.76  
7.75  
7.75  
7.74  
7.74  
7.66  
7.66  
7.65  
7.64  
7.64  
7.42  
7.42  
7.41  
7.41  
7.40  
7.40  
7.39  
7.39  
7.38  
7.37  
7.37  
7.36  
7.36  
7.36  
7.35  
7.35  
7.34  
7.31  
7.31  
7.30  
7.29  
7.28  
7.28  
7.26  
7.26  
7.25  
7.24  
7.24  
7.24  
7.23  
7.22  
7.22  
7.21  
7.21  
7.20  
7.19  
7.19  
7.19  
7.18  
7.18  
7.14  
7.13  
7.13  
7.13  
7.12  
7.11  
7.11  
7.10  
7.10  
7.10  
7.09  
7.08  
7.08  
7.05  
7.05  
7.04  
7.03  
7.01  
6.97  
6.97  
6.96  
6.95  
6.80

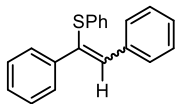

Z and E isomer

<sup>1</sup>H NMR, 400 MHz, CDCl<sub>3</sub>

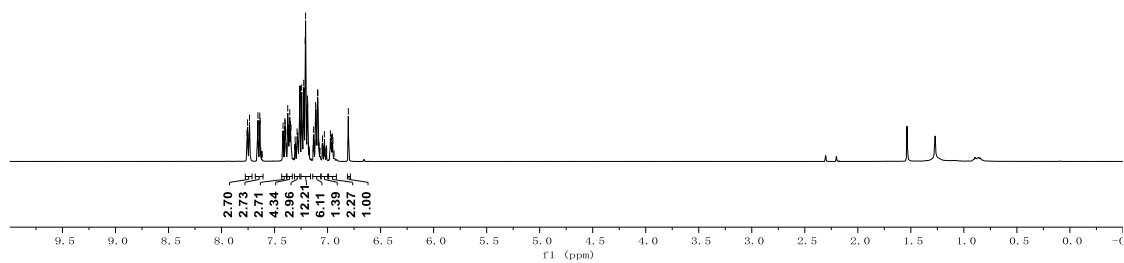

145.19  
144.89  
139.96  
138.15  
136.94  
134.73  
126.94  
125.75  
124.94  
124.72  
124.51  
123.82  
122.37  
121.91  
121.38  
120.96  
120.40  
119.63  
116.34  
111.60  
109.52  
109.45  
109.40  
77.32  
77.00  
76.68

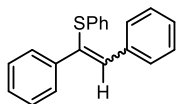

Z and E isomer

<sup>13</sup>C NMR, 101 MHz, CDCl<sub>3</sub>

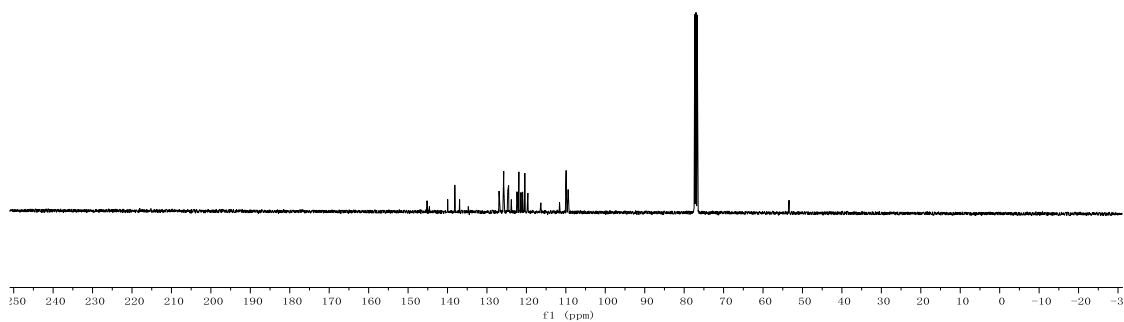

7.55  
7.55  
7.54  
7.54  
7.54  
7.53  
7.53  
7.52  
7.52  
7.51  
7.51  
7.50  
7.33  
7.32  
7.31  
7.31  
7.30  
7.30  
7.29  
7.29  
7.28  
7.28  
7.22  
7.22  
7.21  
7.21  
7.20  
7.20  
7.19  
7.19  
7.19  
7.18  
7.18  
7.17  
7.17  
7.16  
7.16  
7.15  
7.15  
7.14  
7.14  
7.13  
7.13  
7.12  
7.12  
6.97  
6.97  
5.21

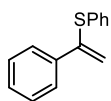

$^1\text{H NMR}$ , 300 MHz,  $\text{CDCl}_3$

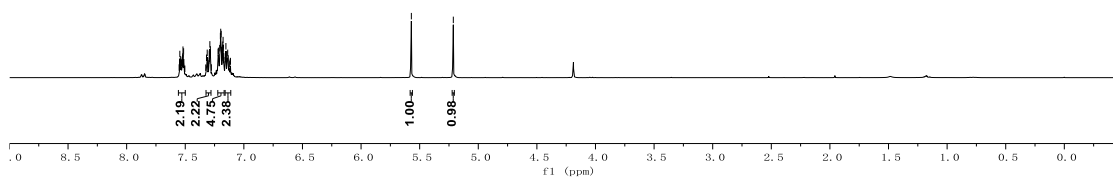

144.43  
138.69  
133.75  
131.90  
129.01  
128.44  
128.26  
127.12  
115.81  
77.42  
77.00  
76.58

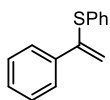

$^{13}\text{C NMR}$ , 75 MHz,  $\text{CDCl}_3$

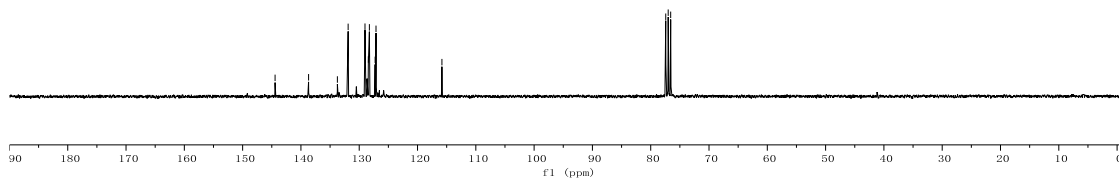

Supplement: ja0c00629_si_001.pdf [file ja0c00629_si_001.pdf]
